# Supplementary material
Source: PubMed Central journal article supplement (PMC3971961)
Supplement: ja4128289_si_001.pdf [file ja4128289_si_001.pdf]

## SUPPORTING INFORMATION

# Dynamics and a Unified Understanding of Competitive [2,3]- and [1,2]-Sigmatropic Rearrangements

Bibaswan Biswas, Sean C. Collins, and Daniel A. Singleton\*

*Department of Chemistry, Texas A&M University, PO Box 30012,  
College Station, Texas 77842, United States*

[singleton@mail.chem.tamu.edu](mailto:singleton@mail.chem.tamu.edu)

|                                                                                                                                                   |    |
|---------------------------------------------------------------------------------------------------------------------------------------------------|----|
| Papers Observing Mixtures of [2,3] and [1,2] Rearrangements .....                                                                                 | 5  |
| Experimental Procedures .....                                                                                                                     | 8  |
| Synthesis and Rearrangement of 1.....                                                                                                             | 8  |
| NMR Measurements .....                                                                                                                            | 10 |
| NMR Results and Calculation of KIEs.....                                                                                                          | 10 |
| Synthesis and Rearrangement of 4.....                                                                                                             | 11 |
| Synthesis and Rearrangement of 4-d <sub>8</sub> .....                                                                                             | 13 |
| Simulation of the Crossover Results with a Kinetic Model, and Error Analysis.....                                                                 | 15 |
| Synthesis and Rearrangement of 1-d <sub>5</sub> .....                                                                                             | 16 |
| Synthesis and Rearrangement of 1-d <sub>2</sub> .....                                                                                             | 18 |
| Computational Procedures and Supporting Computational Results.....                                                                                | 19 |
| General.....                                                                                                                                      | 19 |
| On the Need for Variational Transition State Theory in These Reactions .....                                                                      | 19 |
| GAUSSRATE / POLYRATE Calculations .....                                                                                                           | 19 |
| KIE Predictions .....                                                                                                                             | 20 |
| Table S3. KIE Predictions (25 °C, k <sub>12C</sub> /k <sub>13C</sub> ) versus C <sup>3</sup> -N and C <sup>1</sup> -C <sup>5</sup> Distances..... | 21 |
| Exploration of DFT and ab initio Methods.....                                                                                                     | 22 |
| Energetics of [2,3]-Rearrangement versus Bond Cleavage in Structures A and B.....                                                                 | 23 |
| The Energy Surface for Cleavage During Trajectory Calculations .....                                                                              | 25 |
| Wave Function Stability and Spin Contamination.....                                                                                               | 28 |
| Variational TST Rates for C-N Bond Cleavage versus [2,3]-Rearrangement.....                                                                       | 28 |
| Initialization of Trajectories and Additional Details on Trajectories .....                                                                       | 29 |
| Programs for Calculations and NMR Integrations, and Sample Input Files.....                                                                       | 31 |
| Program Suite PROGDYN .....                                                                                                                       | 31 |
| Program progdynstarterHP .....                                                                                                                    | 32 |
| Program proggenHP.....                                                                                                                            | 37 |
| Program prog1stpoint.....                                                                                                                         | 44 |
| Program prog2ndpoint .....                                                                                                                        | 47 |
| Program progdynb .....                                                                                                                            | 51 |
| Program progcfour .....                                                                                                                           | 55 |
| Program randgen.c .....                                                                                                                           | 56 |
| Program proganal.....                                                                                                                             | 56 |
| progdyn.conf .....                                                                                                                                | 58 |
| Sample Input Files for Gaussrate .....                                                                                                            | 60 |

|                                                                    |    |
|--------------------------------------------------------------------|----|
| poly.fu5 .....                                                     | 60 |
| esp.fu70 .....                                                     | 64 |
| esp.fu71 .....                                                     | 64 |
| esp.fu73 .....                                                     | 65 |
| esp.fu75 .....                                                     | 65 |
| NMR Integration Macro .....                                        | 66 |
| Calculated Structures and Complete Energies .....                  | 70 |
| Guide to Structures, Structure Titles and Their Organization ..... | 70 |
| Structures for the Rearrangement of 2 .....                        | 72 |
| Cation-B3LYP-D2/6-31+G**/PCM- Conf2 .....                          | 72 |
| 23TS-B3LYP-D2/6-31+G**/PCM .....                                   | 72 |
| Cation-B3LYP-D2/6-31+G**/SMD- Conf2 .....                          | 72 |
| 23TS-B3LYP-D2/6-31+G**/SMD .....                                   | 73 |
| Cation-B3LYP-D2/6-31G*/PCM- Conf2 .....                            | 73 |
| 23TS-B3LYP-D2/6-31G*/PCM .....                                     | 74 |
| Cation- B97D3/6-31G*/PCM- Conf2 .....                              | 74 |
| 23TS-B97D3/6-31G*/PCM .....                                        | 74 |
| Cation- N12/6-31+G**/PCM- Conf2 .....                              | 75 |
| 23TS-N12/6-31+G**/PCM .....                                        | 75 |
| 23TS-UN12/6-31+G**/PCM .....                                       | 76 |
| Cation- M06/6-31+G**/PCM- Conf2 .....                              | 76 |
| 23TS- UM06/6-31+G**/PCM .....                                      | 76 |
| 23TS- UM06/6-31+G**/PCM(water) .....                               | 77 |
| Cation- M052X/6-31+G**/PCM .....                                   | 77 |
| 23TS- M052X/6-31+G**/PCM .....                                     | 77 |
| Cation M062X/6-31+G**/PCM Conf1 .....                              | 78 |
| Cation- M062X/6-31+G**/PCM-Conf2 .....                             | 78 |
| TS M062X/6-31+G**/PCM .....                                        | 79 |
| Cation- SOGGA11/6-31G*/Gas- Conf2 .....                            | 79 |
| TS- SOGGA11/6-31G*/Gas .....                                       | 79 |
| Cation- M11/6-31G*/Gas- Conf2 .....                                | 80 |
| TS- M11/6-31G*/Gas .....                                           | 80 |
| Cation- SOGGA11X/6-31G*/Gas- Conf2 .....                           | 81 |
| TS- SOGGA11X/6-31G*/Gas .....                                      | 81 |
| Cation- M11L/6-31G*/Gas- Conf2 .....                               | 81 |
| TS- M11L/6-31G*/Gas .....                                          | 82 |
| Cation- MN12L/6-31G*/Gas- Conf2 .....                              | 82 |
| TS- MN12L/6-31G*/Gas .....                                         | 83 |
| Cation- N12/6-31G*/Gas- Conf2 .....                                | 83 |
| TS- N12/6-31G*/Gas .....                                           | 83 |
| Cation- N12SX/6-31G*/Gas- Conf2 .....                              | 84 |
| TS- N12SX/6-31G*/Gas .....                                         | 84 |
| Cation- MN12SX/6-31G*/Gas- Conf2 .....                             | 85 |
| TS- MN12SX/6-31G*/Gas .....                                        | 85 |
| Cation- APFD/6-31G*/Gas- Conf2 .....                               | 85 |
| TS- APFD/6-31G*/Gas .....                                          | 86 |

|                                            |     |
|--------------------------------------------|-----|
| Cation- B3LYPGD2/6-31G*/Gas- Conf2.....    | 86  |
| TS- B3LYPGD2/6-31G*/Gas.....               | 87  |
| Cation- PBEPBEGD2/6-31G*/Gas- Conf2 .....  | 87  |
| TS- PBEPBEGD2/6-31G*/Gas .....             | 87  |
| Cation- BLYPGD2/6-31G*/Gas-Conf2.....      | 88  |
| TS- BLYPGD2/6-31G*/Gas.....                | 88  |
| Cation- BP86GD2/6-31G*/Gas- Conf2 .....    | 89  |
| TS- BP86GD2/6-31G*/Gas .....               | 89  |
| Cation- B3LYPGD3/6-31G*/Gas-Conf2.....     | 89  |
| TS- B3LYPGD3/6-31G*/Gas.....               | 90  |
| Cation- M06GD3/6-31G*/Gas-Conf2 .....      | 90  |
| TS- M06GD3/6-31G*/Gas.....                 | 91  |
| Cation- PBE1PBEGD3/6-31G*/Gas- Conf2 ..... | 91  |
| TS- PBE1PBEGD3/6-31G*/Gas .....            | 91  |
| Cation1- wB97XD/6-31G*/PCM-Conf1 .....     | 92  |
| Cation3/wb97xd /6-31G */PCM-Conf3.....     | 92  |
| Cation4wb97xd /6-31G */PCM-Conf4.....      | 93  |
| CationB971/6-31G*/PCM-Conf2 .....          | 93  |
| TS B971/6-31G */PCM- .....                 | 93  |
| CationB972/6-31G*/PCM-Conf2 .....          | 94  |
| TS B972/6-31G */ PCM-TS .....              | 94  |
| Cation B97D/6-31G*/PCM-Conf2 .....         | 95  |
| TS B97D/6-31G */ PCM-TS .....              | 95  |
| Cation B97D/6-31+G**/PCM-Conf2.....        | 95  |
| TS B97D/6-31+G **/ PCM-TS .....            | 96  |
| Cation B98/6-31G */PCM-Conf2 .....         | 96  |
| TS B98/6-31G */ PCM-TS .....               | 97  |
| Cation B98/6-31+G* */PCM-Conf2.....        | 97  |
| TS B98/6-31+G **/ PCM-TS .....             | 97  |
| Cation wB97/6-31G */PCM-Conf2 .....        | 98  |
| TS WB97/6-31G */ PCM-TS.....               | 98  |
| Cation wB97XD/6-31G */PCM-Conf2 .....      | 99  |
| WB97XD/6-31G */ PCM-TS .....               | 99  |
| Cation wB97XD/6-31+G **/PCM-Conf2 .....    | 99  |
| TS WB97XD/6-31+G **/ PCM-TS.....           | 100 |
| Cation wB97X/6-31G */PCM-Conf2 .....       | 100 |
| TS wB97x/6-31G*/PCM-TS .....               | 101 |
| Cation wb97x /6-31+G **/PCM-Conf2 .....    | 101 |
| TSwb97x/6-31+G**/PCM .....                 | 101 |
| Cation LC-B97D /6-31G */PCM-Conf2.....     | 102 |
| TS LC-B97D/6-31G */ PCM-TS .....           | 102 |
| Cation- B3LYP /6-31+G**/PCM-Conf2.....     | 103 |
| TS- B3LYP/6-31+G**/PCM .....               | 103 |
| TS- UB3LYP/6-31+G**/PCM .....              | 103 |
| Cation- M06/6-31+G**/PCM-Conf2 .....       | 104 |
| TS-M06/6-31+G**/PCM.....                   | 104 |

|                                               |     |
|-----------------------------------------------|-----|
| Cation/ APFD/6-31G*/PCM- Conf2 .....          | 104 |
| TS/ APFD /6-31G*/PCM.....                     | 105 |
| Cation-B3LYPGD2/6-31G*/PCM-Conf2 .....        | 105 |
| TS/ B3LYPGD2 /6-31G*/PCM .....                | 106 |
| Cation/ PBEGD2/6-31G*/PCM- Conf2 .....        | 106 |
| TS/ PBEGD2 /6-31G*/PCM.....                   | 107 |
| Cation/ BLYPGD2/6-31G*/PCM- Conf2.....        | 107 |
| TS/ BLYPGD2 /6-31G*/PCM.....                  | 107 |
| Cation/ BP86GD2/6-31G*/PCM- Conf2.....        | 108 |
| TS/ BP86GD2 /6-31G*/PCM .....                 | 108 |
| Cation/ B3LYPGD3/6-31G*/PCM- Conf2.....       | 109 |
| TS/ B3LYPGD3 /6-31G*/PCM.....                 | 109 |
| Cation/ M06GD3/6-31G*/PCM- Conf2 .....        | 110 |
| TS/ M06GD3 /6-31G*/PCM.....                   | 110 |
| Cation/ PBE0GD3/6-31G*/PCM- Conf2 .....       | 110 |
| TS/ PBE0GD3 /6-31G*/PCM.....                  | 111 |
| Cation/ B3LYP /6-31G*/PCM-Conf2 .....         | 111 |
| TS/ B3LYP/6-31G*/PCM.....                     | 112 |
| Cation/M11/6-31G*/PCM-Conf2 .....             | 112 |
| TS M11 /6-31G*/PCM .....                      | 112 |
| Cation/M11L/6-31G*/PCM-Conf2.....             | 113 |
| TS/ M11L /6-31G*/PCM.....                     | 113 |
| Cation/MN12L/6-31G*/PCM-Conf2.....            | 113 |
| TS MN12L /6-31G*/PCM .....                    | 114 |
| Cation/MN12SX/6-31G*/PCM-Conf2 .....          | 114 |
| TS MN12SX /6-31G*/PCM .....                   | 115 |
| Cation/N12/6-31G*/PCM-Conf2.....              | 115 |
| TS N12 /6-31G*/PCM .....                      | 115 |
| Cation/N12SX/6-31G*/PCM-Conf2.....            | 116 |
| TS N12SX /6-31G*/PCM.....                     | 116 |
| Cation/ SOGGA11/6-31G*/PCM-Conf2.....         | 117 |
| TS SOGGA11 /6-31G*/PCM .....                  | 117 |
| Cation/ SOGGA11X /6-31G*/PCM-Conf2 .....      | 117 |
| TS SOGGA11X /6-31G*/PCM .....                 | 118 |
| Structures for Reactions of 5.....            | 118 |
| TSCleavageA/ UB3LYP-D2/6-31G*/PCM.....        | 118 |
| TSCleavageB/ UB3LYP-D2/6-31G*/ PCM .....      | 119 |
| TSCleavageA/ UM062X/6-31G*/PCM.....           | 119 |
| TS23/ N12/6-31G*/ exo s-cis /PCM(DMF) .....   | 120 |
| TSCleavageA/ UM06/6-31G*/PCM.....             | 120 |
| TS23/ UM062X/6-31G*/ endo s-cis /PCM .....    | 120 |
| TS23/ UM06/6-31G*/ endo s-trans /PCM .....    | 121 |
| TSCleavageA/ UM06/6-31+G**/ PCM .....         | 121 |
| TS23/ UM062X/6-31G*/ endo s-trans / Gas ..... | 122 |
| TS23/ UM062X/6-31G*/ exo s-trans / PCM .....  | 122 |
| TS23/ UM06/6-31G*/ endo s-cis / PCM .....     | 123 |

|                                                                            |     |
|----------------------------------------------------------------------------|-----|
| TS23/ UM062X/6-31G* exo s-cis /PCM .....                                   | 123 |
| TSCleavageA/ UB3LYP-D2/6-31+G**/ PCM.....                                  | 124 |
| TS23/ UM06/6-31G*/ exo s-cis /PCM .....                                    | 124 |
| TS23/ B3LYP-D2/6-31G*/exo-cis/ PCM.....                                    | 125 |
| TS23/ MPW1KSCF/6-31G*/ endo s-cis /PCM .....                               | 125 |
| TS23/BH AND HLYP/6-31G*/exo s-cis/PCM .....                                | 126 |
| TS23/B3LYP-D2/6-31+G**/exo s-cis/PCM .....                                 | 126 |
| TS23/UM06/6-31G*/exo-trans/PCM .....                                       | 127 |
| TSCleavageA/UM062X/6-31+G**/PCM.....                                       | 127 |
| Polyrate structures for rearrangement of 5: B3LYP-D2/6-31+G**/PCM .....    | 127 |
| 23 Starting Material .....                                                 | 127 |
| 23 Product .....                                                           | 128 |
| 23 Transition State .....                                                  | 128 |
| Polyrate structures for rearrangement of 5: M06/6-31+G**/PCM.....          | 129 |
| 23 Starting Material .....                                                 | 129 |
| 23 Product .....                                                           | 129 |
| 23 Transition State .....                                                  | 130 |
| Polyrate structures for rearrangement of 5: M062X/6-31+G**/PCM .....       | 130 |
| 23 Starting Material .....                                                 | 130 |
| 23 Product .....                                                           | 131 |
| 23 Transition State .....                                                  | 131 |
| Polyrate structures for C-N Bond Cleavage in 5: B3LYP-D2/6-31+G**/PCM..... | 132 |
| Cleavage A Starting Material.....                                          | 132 |
| Cleavage A Product .....                                                   | 132 |
| Cleavage A Transition State .....                                          | 133 |
| Polyrate structures for C-N Bond Cleavage in 5: M06/6-31+G**/PCM.....      | 133 |
| Cleavage A Starting Material.....                                          | 133 |
| Cleavage A Product .....                                                   | 134 |
| Cleavage A Transition State .....                                          | 134 |
| Polyrate structures for C-N Bond Cleavage in 5: M062X/6-31+G**/PCM.....    | 135 |
| Cleavage A Starting Material.....                                          | 135 |
| Cleavage A Product .....                                                   | 135 |
| Cleavage A Transition State .....                                          | 136 |
| Polyrate structures for rearrangement of 2: M06/6-31+G**/PCM(DMF) .....    | 136 |
| 23 Starting Material .....                                                 | 136 |
| 23 Product .....                                                           | 137 |
| 23 Transition State .....                                                  | 137 |
| Polyrate structures for rearrangement of 2: M062X/6-31+G**/PCM(DMF).....   | 137 |
| 23 Starting Material .....                                                 | 137 |
| 23 Product .....                                                           | 138 |
| 23 Transition State .....                                                  | 138 |
| References, and Complete Reference 5b: .....                               | 139 |

## Papers Observing Mixtures of [2,3] and [1,2] Rearrangements

1. Schöllkopf, U.; Fellenberger, K. *Justus Liebigs Ann. Chem.* **1966**, 698, 80-85

2. Schöllkopf, U.; Fellenberger, K.; Rizk, M. *Justus Liebigs Ann. Chem.* **1970**, 734, 106-115.
3. Potter, S. E.; Sutherland, I. O. *Chem. Commun.* **1973**, 520-521.
4. Workman, J. A.; Garrido, N. P.; Sançon, J.; Roberts, E.; Wessel, H. P.; Sweeney, J. B. *J. Am. Chem. Soc.* **2004**, 127, 1066-1067.
5. Tayama, E.; Kimura, H. *Angew. Chem., Int. Ed.* **2007**, 46, 8869-8871.
6. Tayama, E.; Orihara, K.; Kimura, H. *Org. Biomol. Chem.* **2008**, 6, 3673-3680.
7. Tomoyasu, T.; Tomooka, K.; Nakai, T. *Tetrahedron Lett.* **2003**, 44, 1239-1242.
8. Tsubuki, M.; Okita, H.; Honda, T. *Chem. Commun.* **1995**, 2135-2136.
9. Vedejs, E.; Mullins, M. J. *J. Org. Chem.* **1979**, 44, 2947-2948.
10. Vedejs, E.; Hagen, J. P.; Roach, B. L.; Spear, K. L. *J. Org. Chem.* **1978**, 43, 1185-1190.
11. Anderson, A. G.; Wills, M. T. *J. Org. Chem.* **1968**, 33, 3046-3050.
12. Ando, W. *Acc. Chem. Res.* **1977**, 10, 179-185.
13. Ando, W.; Yamada, M.; Matsuzaki, E.; Migita, T. *J. Org. Chem.* **1972**, 37, 3791-3797.
14. Biellmann, J.F.; Schmitt, J.L. *Tetrahedron Lett.* **1973**, 14, 4615-4618.
15. Mitchell, R. H.; Boekelheide, V. *J. Am. Chem. Soc.* **1974**, 96, 1547-1557.
16. Bol, K.M.; Liskamp, R.M.J. *Tetrahedron.* **1992**, 48, 6425-6438.
17. Bol, K.M.; Liskamp, R.M.J. *Tetrahedron Lett.* **1991**, 32, 5401-5404.
18. Bumgardner, C. L. *J. Am. Chem. Soc.* **1963**, 85, 73-78.
19. Bumgardner, C. L.; Hsu, H.-B.; Afghahi, F.; Roberts, W. L.; Purrington, S. T. *J. Org. Chem.* **1979**, 44, 2348-2353.
20. Verner, E. J.; Cohen, T. *J. Org. Chem.* **1992**, 57, 1072-1073.
21. March, P. D.; Moreno-Mañas, M.; Ripoll, I. *Chem. Ber.* **1987**, 120, 1413-1419.
22. Durst, T.; Van den Elzen, R.; LeBelle, M. J. *J. Am. Chem. Soc.* **1972**, 94, 9261-9263.
23. kemoto, H.; Sasaki, M.; Takeda, K. *Eur. J. Org. Chem.* **2010**, 6643-6650.
24. Endo, Y.; Uchida, T.; Shudo, K. *Tetrahedron Lett.* **1997**, 38, 2113-2116.
25. Giumanini, A. G.; Trombini, C.; Lercker, G.; Lepley, A. R. *J. Org. Chem.* **1976**, 41, 2187-2193.
26. Alberti, A.; Griller, D.; Nazran, A. S.; Pedulli, G. F. *J. Am. Chem. Soc.* **1986**, 108, 3024-3028.
27. Grovenstein, E.; Wentworth, G. *J. Am. Chem. Soc.* **1967**, 89, 1852-1862.
28. Hanessian, S.; Talbot, C.; Saravanan, P. *Synthesis.* **2006**, 4, 723-734.
29. Hayashi, Y.; Oda, R. *Tetrahedron Lett.* **1968**, 9, 5381-5384.
30. Jonczyk, A.; Zdrojewski, T.; Grzywaca, P.; Balcerzak, P. *Perkin Trans. I* **1996**, 2919-2923.
31. Kirmse, W.; Kund, K. *J. Am. Chem. Soc.* **1989**, 111, 1465-1473.
32. Nishimura, T.; Zhang, C.; Maeda, Y.; Shirai, N.; Ikeda, S.; Sato, Y. *Chem. Pharm. Bull.* **1999**, 47, 267-272.
33. Dossena, A.; Marchelli, R.; Casnati, G. *Perkin Trans. I* **1983**, 1141-1144.
34. Garbi, A.; Allain, L.; Chorki, F.; Ourévitch, M.; Crousse, B.; Bonnet-Delpon, D.; Nakai, T.; Bégué, J.-P. *Org. Lett.* **2001**, 3, 2529-2531.
35. Burdon, M. G.; Moffatt, J. G. *J. Am. Chem. Soc.* **1966**, 88, 5855-5864.
36. Jemison, R. W.; Laird, T.; Ollis, W. D.; Sutherland, I. O. *Perkin Trans. I* **1980**, 1450-1457.
37. Rautenstrauch, V. *Chem. Commun.* **1970**, 4-6.
38. Tomooka, K.; Igarashi, T.; Kishi, N.; Nakai, T. *Tetrahedron Lett.* **1999**, 40, 6257-6260.
39. Aggarwal, V. K.; Fang, G. y.; Charmant, J. P. H.; Meek, G. *Org. Lett.* **2003**, 5, 1757-1760.

40. Jemison, R. W.; Laird, T.; Ollis, W. D.; Sutherland, I. O. *Perkin Trans. I* **1980**, 1436-1449.
41. Laird, T.; Ollis, W. D.; Sutherland, I. O. *Perkin Trans. I* **1980**, 1477-1486.
42. Mageswaran, S.; Ollis, W. D.; Southam, D. A.; Sutherland, I. O.; Thebtaranonth, Y. *Perkin Trans. I* **1981**, 1969-1980.
43. Chantrapromma, K.; Ollis, W. D.; Somanathan, R.; Sutherland, I. O. *Perkin Trans. I* **1983**, 1041-1048.
44. Chantrapromma, K.; Ollis, W. D.; Sutherland, I. O. *Perkin Trans. I* **1983**, 1029-1039.
45. Pine, S. H.; Munemo, E. M.; Phillips, T. R.; Bartolini, G.; Cotton, W. D.; Andrews, G. C. *J. Org. Chem.* **1971**, *36*, 984-991.
46. Archer, D. A. *J. Chem. Soc., Organic*, **1971**, 1329-1331.
47. Rautenstrauch, V. *Helv. Chim. Acta*, **1972**, 2233-2241.
48. Zhang, C.; Maeda, Y.; Shirai, N.; Sato, Y. *Perkin Trans. I* **1997**, 25-28.
49. Nakano, M.; Sato, Y. *Chem. Commun.* **1985**, 1684-1685.
50. Tanaka, T.; Shirai, N.; Sato, Y. *Chem. Pharm. Bull.* **1992**, *40*, 518-520.
51. Sato, Y.; Yagi, Y.; Koto, M. *J. Org. Chem.* **1980**, *45*, 613-617.
52. Nakano, M.; Sato, Y. *J. Org. Chem.* **1987**, *52*, 1844-1847.
53. Shirai, N.; Sato, Y. *J. Org. Chem.* **1988**, *53*, 194-196.
54. Shirai, N.; Watanabe, Y.; Sato, Y. *J. Org. Chem.* **1990**, *55*, 2767-2770.
55. Okazaki, S.; Shirai, N.; Sato, Y. *J. Org. Chem.* **1990**, *55*, 334-337.
56. Tanaka, T.; Shirai, N.; Sugimori, J.; Sato, Y. *J. Org. Chem.* **1992**, *57*, 5034-5036.
57. Sato, Y.; Shirai, N.; Machida, Y.; Ito, E.; Yasui, T.; Kurono, Y.; Hatano, K. *J. Org. Chem.* **1992**, *57*, 6711-6716.
58. Maeda, Y.; Shirai, N.; Sato, Y.; Tatewaki, H. *J. Org. Chem.* **1994**, *59*, 7897-7901.
59. Sakuragi, A.; Shirai, N.; Sato, Y.; Kurono, Y.; Hatano, K. *J. Org. Chem.* **1994**, *59*, 148-153.
60. Kawanishi, N.; Shirai, N.; Sato, Y.; Hatano, K.; Kurono, Y. *J. Org. Chem.* **1995**, *60*, 4272-4275.
61. Narita, K.; Shirai, N.; Sato, Y. *J. Org. Chem.* **1997**, *62*, 2544-2549.
62. Maeda, Y.; Shirai, N.; Sato, Y. *Perkin Trans. I* **1994**, 393-398.
63. Kitano, T.; Shirai, N.; Motoi, M.; Sato, Y. *Perkin Trans. I* **1992**, 2851-2854.
64. Tanzawa, T.; Shirai, N.; Sato, Y.; Hatano, K.; Kurono, Y. *Perkin Trans. I* **1995**, 2845-2848.
65. Baldwin, J. E.; DeBernar, J.; Patrick, J. E. *Tetrahedron Lett.* **1970**, 353-356.
66. Chantrapromma, K.; Ollis, W. D.; Sutherland, I. O. *Chem. Commun.* **1977**, 97-99.
67. Blid, J.; Panknin, O.; Tuzina, P.; Somfai, P. *J. Org. Chem.* **2007**, *72*, 1294-1300.
68. Still, W. C.; Mitra, A. *J. Am. Chem. Soc.* **1978**, *100*, 1927-1928.
69. Usami, T.; Shirai, N.; Sato, Y. *J. Org. Chem.* **1992**, *57*, 5419-5425.
70. Sato, Y.; Sakakibara, H. *J. Organomet. Chem.* **1979**, *166*, 303-307.
71. Hasiak, B.; Barbry, D.; Couturier, D. *Tetrahedron Lett.* **1990**, *31*, 5769-5770.
72. Zdrojewski, T.; Jończyk, A. *Tetrahedron Lett* **1995**, *36*, 1355-1358.
73. Barbry, D.; Spanneut, D.; Hasiak, B.; Couturier, D. *Tetrahedron* **1991**, *47*, 47-52.
74. Chantrapromma, K.; Ollis, W. D.; Sutherland, I. O. *Chem. Commun.* **1978**, 670-671.
75. Laird, T.; Ollis, W. D. *Chem. Commun.* **1973**, 658-660.
76. Chantrapromma, K.; Ollis, W. D.; Sutherland, I. O. *Chem. Commun.* **1978**, 673-675.
77. Ollis, W. D.; Rey, M.; Sutherland, I. O. *Chem. Commun.* **1978**, 675-676.

78. Jemison, R. W.; Laird, T.; Ollis, W. D. *Chem. Commun.* **1972**, 556-557.
79. Laird, T.; Ollis, W. D.; Sutherland, I. O. *Perkin Trans. I* **1980**, 2033-2048.
80. Chantrapromma, K.; Ollis, W. D.; Sutherland, I. O. *Perkin Trans. I* **1983**, 1049-1061.
81. Yamamoto, Y.; Oda, J. i.; Inouye, Y. *Tetrahedron Lett.* **1979**, 20, 2411.
82. Jemison, R. W.; Ollis, W. D.; Sutherland, I. O.; Tannock, J. *Perkin Trans. I* **1980**, 1462.
83. Tsubuki, M.; Kamata, T.; Okita, H.; Arai, M.; Shigihara, A.; Honda, T. *Chem. Commun.* **1999**, 2263-2264.
84. Murata, Y.; Nakai, T. *Chem. Lett.* **1990**, 19, 2069-2072.
85. Sugimura, T.; Paquette, L. A. *J. Am. Chem. Soc.* **1987**, 109, 3017-3024.
86. Venneri, P. C.; Warkentin, J. *J. Am. Chem. Soc.* **1998**, 120, 11182-11183.
87. Yamamoto, Y.; Oda, J.; Inouye, Y. *J. Org. Chem.* **1976**, 41, 303-306. (I think source of competition s equilibration )
88. De March, P.; Moreno-Manas, M.; Roca, J. L. *J. Org. Chem.* **1988**, 53, 5149.
89. Doi, T.; Takahashi, T. *J. Org. Chem.* **1991**, 56, 3465.
  
90. Marshall, J. A.; Bartley, G. S.; Wallace, E. M. *J. Org. Chem.* **1996**, 61, 5729-5735.
91. Hanessian, S.; Dorich, S.; Chattopadhyay, A. K.; Büschleb, M. *J. Org. Chem.* **2013**, 78, 8915-8921.
92. Hodgson, D. M.; Moreno-Clavijo, E.; Day, S. E.; Man, S. *Org. Biomol. Chem.* **2013**, 11, 5362 -5369.
93. Maleczka, R. E.; Geng, F. *Org. Lett.* **1999**, 1, 1111 -1113.
94. Mulzer, J.; Riether, D. *Org. Lett.* **2000**, 2, 3139-3141.
95. Gawley, R. E.; Moon, K. *Org. Lett.* **2007**, 9, 3093-3096.
96. Verner, E. J.; Cohen, T. *J. Am. Chem. Soc.* **1992**, 114, 375-377.
97. Gawley, R. E.; Zhang, Q.; Campagna, S. *J. Am. Chem. Soc.* **1995**, 117, 11817-11818.
98. Jaber, D. M.; Burgin, R. N.; Helper, M.; Zavalij, P. Y.; Doyle, M. P. *Org. Lett.* **2012**, 14, 1676-1669.
99. Tayama, E.; Takedachi, K.; Iwamoto, H.; Hasegawa, E. *Tetrahedron* **2010**, 66, 9389-9395.
100. Jemison, R. W.; Laird, T.; Ollis, W. D.; Sutherland, I. O. *J. Chem. Soc. Perkin Trans. I* **1980**, 1458-1461.

## Experimental Procedures

### Synthesis and Rearrangement of **1**.

Synthesis of ammonium salt **1**. The ammonium salt **1** was prepared from the reaction of *N,N*-dimethylglycine methyl ester<sup>1</sup> with allyl bromide by methods previously described.<sup>2,3</sup>

General procedures for DBU-induced rearrangements. All glassware, magnetic stirring bars, and molecular sieves used in these reactions were oven-dried overnight. Solvent was dried using 4 Å molecular sieves.

DBU-Induced Rearrangement of **1** - Sample<sup>4</sup>. *Trans*-stilbene (1.81 g, 10.0 mmol, internal standard) and **1** (20.18 g, 84.8 mmol) were dissolved in 25 mL of DMF, then DBU (1.98 g, 14.8 mmol) and 24 g of 4 Å powdered molecular sieves were added and the mixture was left stirring for 30 min at 25 °C, allowing the reaction to proceed to 11.7% conversion. The reaction mixture was diluted with 40 mL of CHCl<sub>3</sub> and 70 mL of water, and then the aqueous layer was extracted twice with 70 mL of CHCl<sub>3</sub>. The organics were washed with 50 mL of water, dried with Na<sub>2</sub>SO<sub>4</sub>,



and concentrated under reduced pressure. The residual organics were dissolved in 150 mL of Et<sub>2</sub>O, washed twice with 50 mL of water, then dried with Na<sub>2</sub>SO<sub>4</sub> and concentrated under reduced pressure. The resulting crude mixture was purified by flash chromatography using 1% MeOH in DCM to afford 0.50 g (4%) of **3**. <sup>1</sup>H NMR (CDCl<sub>3</sub>): δ 2.26 (s, 6 H), 2.35 (m, 2 H), 3.1 (dd, 1 H), 3.6 (s, 3 H), 5.0 (m, 2 H), 5.7 (m, 1 H). <sup>13</sup>C NMR (CDCl<sub>3</sub>): δ 33.7, 41.3, 50.6, 67.2, 116.8, 134.0, 171.7.

DBU-Induced Rearrangement of **1** - Standard.<sup>4</sup> *Trans*-stilbene (0.92 g, 5.1 mmol, internal standard) and **1** (3.57 g, 15 mmol) were dissolved in 15 mL of DMF, then 9.13 g (60 mmol, 4 eq.) of DBU and 12 g of 4 Å powdered molecular sieves were added and the mixture left stirring for 3h at r.t., allowing the reaction to proceed to 100% conversion. The reaction mixture was diluted with 50 mL of CHCl<sub>3</sub> and 70 mL of water, and then the aqueous layer was extracted twice with 70 mL of CHCl<sub>3</sub>. The organics were washed with 50 mL of water, dried with Na<sub>2</sub>SO<sub>4</sub>, and concentrated under reduced pressure. The residual organics were dissolved in 150 mL of Et<sub>2</sub>O, washed twice with 50 mL of water, then dried with Na<sub>2</sub>SO<sub>4</sub> and concentrated under reduced pressure. The resulting crude mixture was purified by flash chromatography using 1% MeOH in DCM to afford 0.64 g (27%) of **3**.

In each case closely analogous reactions were carried out for duplicate measurements of the KIEs. In the duplicate samples the conversion of the sample was 21.3%.

#### <sup>13</sup>C NMR Spectrum of Sample

A note on spectra: we certify that all spectra presented are unaltered screen dumps or pdf printouts of the original spectra. Please note that scales are typically increased by a factor of 5 from normal to show impurities clearly. The raw electronic files are saved and always available on request.

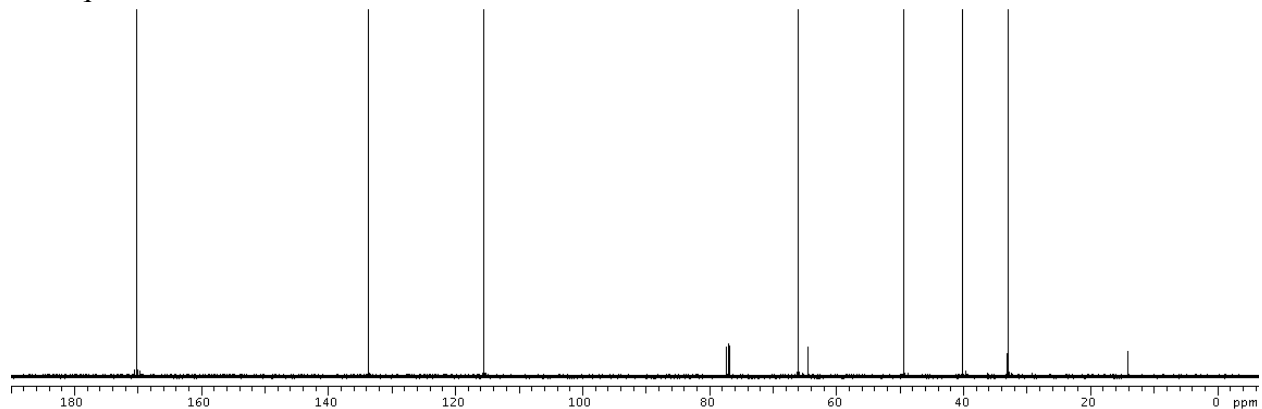

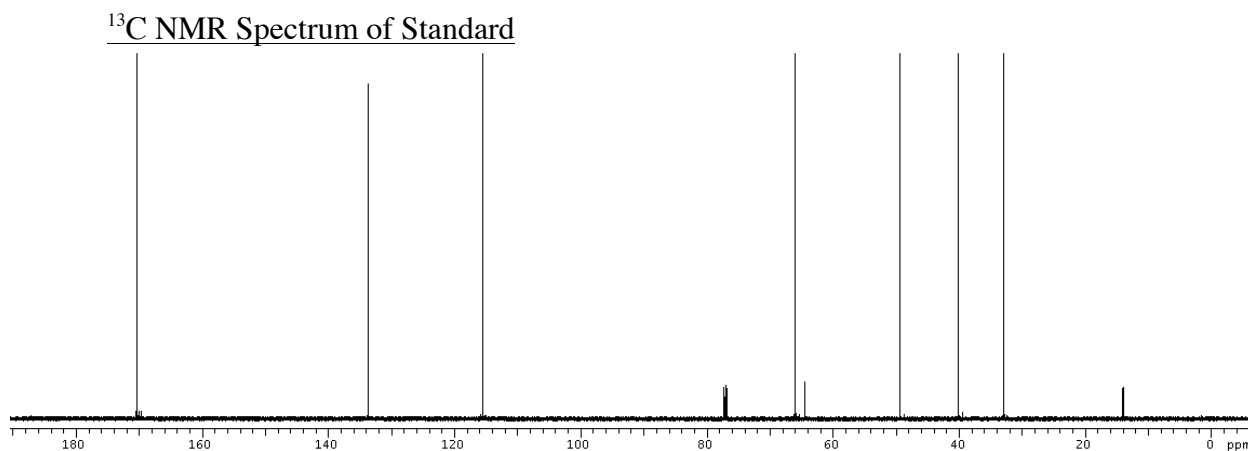

### NMR Measurements

All NMR samples consisted of approximately 400 mg of **3** in 5 mm NMR tubes filled to a constant height of 5 cm with CDCl<sub>3</sub>. The <sup>13</sup>C spectra were recorded at 125.7 MHz using inverse gated decoupling, 75.5 s delays between calibrated  $\pi/2$  pulses, and a 12 s acquisition time to collect 600,000 points. The integrations were obtained numerically by a procedure given in a macro provided in a later section. A zero-order baseline correction was generally applied, but to avoid any qualitative manipulation no first-order or higher-order baseline correction was ever applied. Six spectra were recorded for each sample and standard.

### NMR Results and Calculation of KIEs

The raw integrations are shown in Table S1, along with average values and standard deviations. The integration of peak 5, the methyl-ester carbon, was in each case set to 1000.

**Table S1.**

| macro used: macrokie2samp |                                     |        |        |        |        |         |       |
|---------------------------|-------------------------------------|--------|--------|--------|--------|---------|-------|
| SAMPLE2                   | File: SEAN-KIE2-SAMPLE-ERIK-CUT-OME |        |        |        |        | average | stdev |
| 1054.8                    | 1052.3                              | 1055.2 | 1053.6 | 1053.4 | 1054.6 | 1054.0  | 1.1   |
| 1020.7                    | 1021.2                              | 1022.5 | 1021.3 | 1020.8 | 1021.6 | 1021.4  | 0.7   |
| 950.5                     | 950.9                               | 952.6  | 949.1  | 950.7  | 949.6  | 950.6   | 1.2   |
| 992.0                     | 991.6                               | 991.1  | 992.7  | 991.8  | 992.3  | 991.9   | 0.6   |
| 1000.0                    | 1000.0                              | 1000.0 | 1000.0 | 1000.0 | 1000.0 | 1000.0  | 0.0   |
| 1942.9                    | 1942.8                              | 1943.6 | 1941.3 | 1943.7 | 1943.8 | 1943.0  | 1.0   |
| 989.5                     | 989.6                               | 990.0  | 990.0  | 987.4  | 990.0  | 989.4   | 1.0   |

| macro used: macrokie2 |                                       |        |        |        |        |         |       |
|-----------------------|---------------------------------------|--------|--------|--------|--------|---------|-------|
| Standard2             | File: SEAN-KIE2-STANDARD-ERIK-CUT-OME |        |        |        |        | average | stdev |
| 1063.2                | 1062.8                                | 1063.1 | 1063.6 | 1064.4 | 1065.0 | 1063.7  | 0.9   |
| 1022.9                | 1021.5                                | 1022.5 | 1022.9 | 1024.2 | 1026.2 | 1023.4  | 1.6   |
| 989.2                 | 992.7                                 | 992.1  | 995.0  | 992.9  | 995.0  | 992.8   | 2.1   |
| 998.7                 | 1000.0                                | 998.0  | 999.4  | 1000.5 | 1000.5 | 999.5   | 1.0   |
| 1000.0                | 1000.0                                | 1000.0 | 1000.0 | 1000.0 | 1000.0 | 1000.0  | 0.0   |
| 1943.1                | 1945.9                                | 1945.1 | 1946.9 | 1948.4 | 1948.9 | 1946.4  | 2.2   |
| 996.9                 | 999.2                                 | 996.7  | 1000.3 | 998.5  | 1000.6 | 998.7   | 1.6   |

macro used: seankiesamp

| SAMPLE1 | File: SEAN-KIE-SAMPLE-ERIK-CUT |        |        |        |        |        | average | stdev |
|---------|--------------------------------|--------|--------|--------|--------|--------|---------|-------|
| 1020.9  | 1022.4                         | 1024.0 | 1025.4 | 1022.5 | 1026.4 | 1023.6 | 2.0     |       |
| 1022.7  | 1020.9                         | 1021.3 | 1021.3 | 1022.2 | 1022.3 | 1021.8 | 0.7     |       |
| 947.7   | 944.9                          | 949.0  | 947.4  | 951.8  | 948.1  | 948.2  | 2.2     |       |
| 985.5   | 983.3                          | 980.4  | 986.6  | 984.9  | 986.5  | 984.5  | 2.4     |       |
| 1000.0  | 1000.0                         | 1000.0 | 1000.0 | 1000.0 | 1000.0 | 1000.0 | 0.0     |       |
| 1921.3  | 1922.3                         | 1922.9 | 1923.9 | 1921.5 | 1922.5 | 1922.4 | 1.0     |       |
| 969.8   | 968.4                          | 966.8  | 967.1  | 968.4  | 968.4  | 968.1  | 1.1     |       |

| macro used: seankiestd |                                  |        |        |        |        |        |         |       |
|------------------------|----------------------------------|--------|--------|--------|--------|--------|---------|-------|
| Standard1              | File: SEAN-KIE-STANDARD-ERIK-CUT |        |        |        |        |        | average | stdev |
| 1033.5                 | 1029.5                           | 1033.8 | 1032.3 | 1033.0 | 1035.1 | 1032.9 | 1.9     |       |
| 1021.6                 | 1018.5                           | 1019.3 | 1018.4 | 1022.5 | 1025.2 | 1020.9 | 2.7     |       |
| 991.5                  | 988.7                            | 990.2  | 991.5  | 992.2  | 991.3  | 990.9  | 1.3     |       |
| 992.8                  | 987.9                            | 987.1  | 992.9  | 990.1  | 996.9  | 991.3  | 3.6     |       |
| 1000.0                 | 1000.0                           | 1000.0 | 1000.0 | 1000.0 | 1000.0 | 1000.0 | 0.0     |       |
| 1927.1                 | 1922.0                           | 1920.3 | 1926.8 | 1928.5 | 1933.6 | 1926.4 | 4.8     |       |
| 978.1                  | 978.6                            | 973.6  | 978.7  | 977.3  | 980.9  | 977.9  | 2.4     |       |

The isotope effects in the main text were then calculated as:

$$\text{KIE} = \ln(1-F)/\ln(1-(F*\text{IntSample}/\text{IntStandard}))$$

where F is the fractional conversion (0.117 for reaction 1, 0.213 for reaction 2), IntSample is the average integration for the sample for the carbon peak of interest in the table above, and IntStandard is the average integration for standard for the carbon peak of interest in the table above. For example, the KIE for carbon 1 of sample 2 /standard 2 was calculated as  $\ln(1-0.213)/\ln(1-0.213*1054.0/1063.7)$ .

The uncertainties arising from uncertainties in F were negligible, and the major source of uncertainty is random variation in the integrations due to noise. For six measurements, the 95% confidence ranges in the average raw integrations are approximately the standard deviations shown in the table above, and the 95% confidence ranges for the KIEs were approximated as the square-root of the sum of the squares of the fraction uncertainties in the integrations. For example, the uncertainty for carbon 1 of sample 2 /standard 2 was calculated as  $[(1.1/1054)^2 + (0.9/1063.7)^2]^{1/2}$ .

#### Synthesis and Rearrangement of 4.

N,N-Dimethylalanine Methyl Ester.<sup>5</sup> A mixture of 4.50 g (39.55 mmol) of 40% aqueous solution of dimethylamine and 4 mL of acetonitrile was cooled to 0 °C in an ice-bath. After cooling, 3.31 g (19.82 mmol) of methyl 2-bromopropanoate was added and the mixture was stirred at 0 °C for 12 h. The stirring was continued further for 12 h at room temperature. The reaction mixture was then poured into 20 mL of water and the organics extracted with three 50-mL portions of diethyl ether. The ether extracts were combined and dried over anhydrous sodium sulfate. The ether was then removed on a rotatory evaporator to afford 1.00 g (38%) crude N,N-dimethylalanine methyl ester (**1**), judged to be more than 95% pure by NMR analysis. <sup>1</sup>H NMR (399.53 MHz, CDCl<sub>3</sub>): δ 1.27 (d, J = 7.0 Hz, 3 H), 2.31 (s, 6 H), 3.22 (q, J = 7.0 Hz, 1 H), 3.70 (s, 3 H). <sup>13</sup>C NMR (75.42 MHz, CDCl<sub>3</sub>): δ 14.7, 41.9, 51.6, 63.0, 173.9.

Ammonium salt 4.<sup>6</sup> To a mixture of 1.00 g (7.62 mmol) of N,N-dimethylalanine methyl ester and 4 mL of hexanes (dried over 4 Å molecular sieves) under nitrogen at room temperature

was added 1.14 g (7.65 mmol) of 1-bromo-3-methylbut-2-ene. The resulting mixture was stirred for 16 h. During the stirring some solid precipitated out from the solution. After the solid was dissolved in minimum amount of dichloromethane, approximately 2 mL of THF was added followed by 10 mL of hexanes, and the mixture was again stirred overnight to precipitate out the solid. This precipitation process was repeated twice to afford 1.14 g (53%) of **4**.  $^1\text{H}$  NMR ( $\text{CDCl}_3$ ):  $\delta$  1.76 (d,  $J=7.2$  Hz, 3 H), 1.86 (s, 6 H), 3.37 (s, 3 H), 3.44 (s, 3 H), 3.80 (s, 3 H), 4.43 (q,  $J = 8.1$  Hz, 13.5 Hz, 1 H), 4.49 (q,  $J = 8.06$  Hz, 13.48 Hz, 1 H), 4.92 (q,  $J = 7.2$  Hz, 1 H), 5.34 (t,  $J = 8.1$  Hz, 1H).  $^{13}\text{C}$  NMR (100.47 MHz,  $\text{CDCl}_3$ ):  $\delta$  13.6, 19.4, 26.7, 47.5, 48.6, 53.5, 61.7, 67.0, 110.3, 150.0, and 168.8.

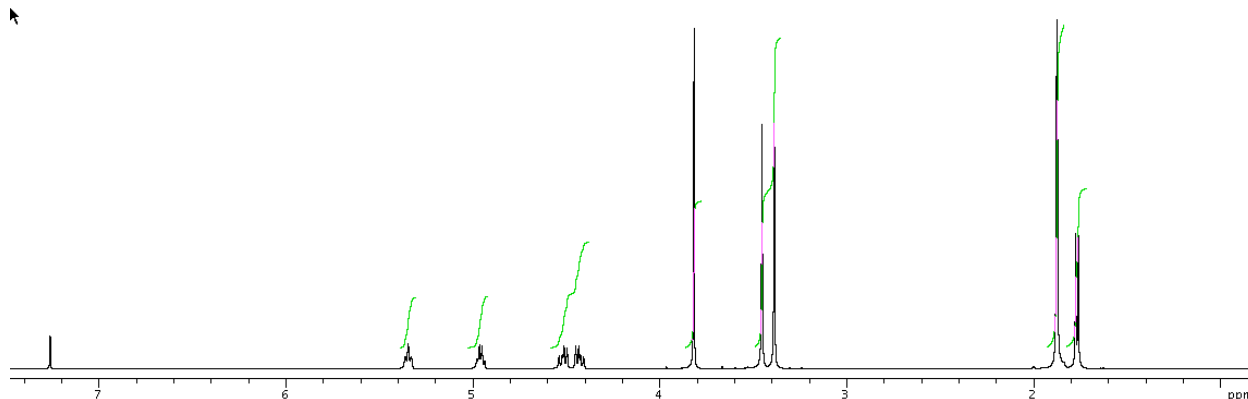

**DBU-Induced Rearrangement of 4.**<sup>6</sup> To a mixture of 1.5 mL of acetonitrile (dried over calcium hydride followed by distillation under nitrogen) and 1.58 g (5.63 mmol) of **4** under nitrogen at 90 °C was added 1.53 g (10.0 mmol) of DBU dropwise. The mixture was stirred for 2 h at 90 °C. After cooling the reaction mixture to room temperature, it was partitioned between 25 mL of ether and 25 mL of water. The ether layer was washed with five 25-mL portions of water, dried ( $\text{Na}_2\text{SO}_4$ ), and the volatiles were removed on a rotatory evaporator to afford 779 mg (69%) of mixture of **6** and **7**. The ratio of the [2,3] product **6** and the [1,2] product **7** was determined to be approximately 80:20 by  $^1\text{H}$ -NMR analysis. The isomers were separated by flash chromatography on silica gel using 20% ethyl acetate in hexanes as eluent.

**6:**  $^1\text{H}$  NMR ( $\text{CDCl}_3$ ):  $\delta$  1.06 (s, 3 H), 1.14 (s, 3 H), 1.16 (s, 3 H), 2.20 (s, 6 H), 3.70 (s, 3 H), 5.01 (t,  $J = 6.8$  Hz,  $J = 11.3$  Hz, 2 H), 6.24 (q,  $J = 6.8$  Hz,  $J = 11.3$  Hz, 1 H).  $^{13}\text{C}$  NMR ( $\text{CDCl}_3$ ): 9.1, 24.5, 25.0, 41.3, 42.7, 51.6, 72.8, 111.8, 145.6 and 175.4.

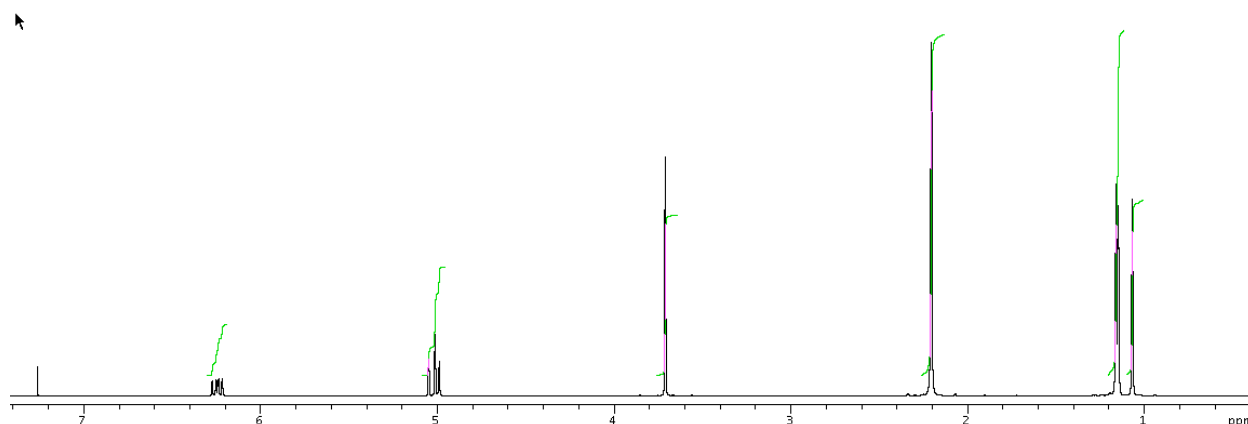

**7:**  $^1\text{H}$  NMR ( $\text{C}_6\text{D}_6$ )  $\delta$  1.34 (s, 3 H), 1.51 (s, 3 H), 1.64 (s, 3 H), 2.29 (s, 6 H), 2.55 (m, 2 H), 3.34 (s, 3 H), 5.38 (t,  $J = 7.2$  Hz, 1 H).  $^{13}\text{C}$  NMR (75 MHz,  $\text{CDCl}_3$ ): 18.6, 20.4, 26.6, 36.4,

40.2, 51.1 66.6, 120.9, 134.1, 174.4. The nonintegrated peaks in the  $^1\text{H}$  NMR spectrum shown below are  $\text{C}_6\text{D}_5\text{H}$  (7.15), water (0.46) and silicone grease (0.28).

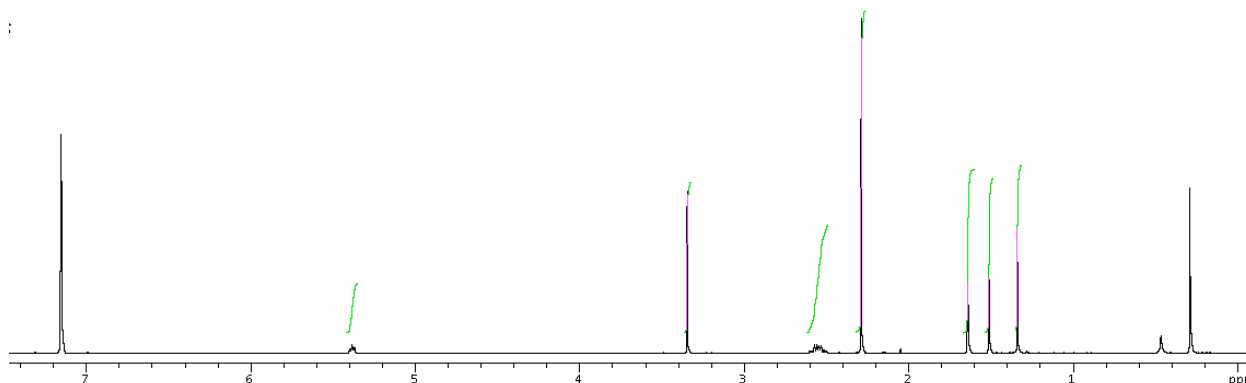

**Product Ratio versus Temperature.** To a mixture of 1.5 mL of acetonitrile (dried over calcium hydride followed by distilled under nitrogen) and 300 mg (1.07 mmol) of **4** under nitrogen at 90 °C was added 305 mg (2.00 mmol) of DBU dropwise. From the reaction mixture 0.30-mL aliquots were withdrawn at 30-min, 60-min and 120-min. The aliquots were diluted with 10 mL of diethyl ether and the mixture was washed with three 5-mL portions of water and dried ( $\text{Na}_2\text{SO}_4$ ), and the volatiles were removed on a rotatory evaporator. The ratio of the [2,3] product **6** and the [1,2] product **7** was then evaluated by  $^1\text{H}$ -NMR analysis.

In closely analogous reactions (identical concentrations), the product ratio was determined at 70 °C, 50 °C, and room temperature. The resulting product ratios, determined by  $^1\text{H}$  NMR analysis, are shown in Table S2.

In a control experiment, 210 mg of a 95:5 mixture of **6** and **7** was heated at 90 °C for 20 h in 1 mL of acetonitrile in presence of 0.3 mL of DBU. The proportion of **3a** to **3b** was unaltered based on NMR analysis.

**Table S2.** Product ratios versus temperature for the rearrangement of **4**.

| Temperature      | % of <b>6</b> ([2,3]) | % of <b>7</b> ([1,2]) |
|------------------|-----------------------|-----------------------|
| 90 °C            | 80.6                  | 19.4                  |
| 70 °C            | 85.3                  | 14.7                  |
| 50 °C            | 88.9                  | 11.1                  |
| Room temperature | 94.9                  | 5.1                   |

**Rearrangement of **4** using Potassium Hydride.** A 50% suspension of potassium hydride in paraffin oil (800 mg, 10 mmol) was rinsed with pentane, and 5 mL dichloromethane was added, followed by the slow addition of 1.00 g (3.57 mmol) of **4**. The reaction mixture was allowed to stir overnight at room temperature then quenched by the slow addition of 1 mL of water at 0 °C. The reaction mixture was partitioned between 25 mL of ether and 25 mL of water, and the ether layer was dried over anhydrous potassium carbonate. The volatiles were removed on a rotary evaporator, and the ratio of **6** and **7** by  $^1\text{H}$ -NMR analysis was 95:5.

#### Synthesis and Rearrangement of **4-d<sub>8</sub>**.

**3-Methyl-2-buten-1,1-d<sub>2</sub>-1-ol.**<sup>7</sup> To a mixture of 40 mL of diethyl ether (dried over sodium followed by distillation under nitrogen) and 476 mg (11.33 mmol) of  $\text{LiAlD}_4$  under

nitrogen at 0 °C was added dropwise 1.92 g (14.98 mmol) of ethyl 3-methylcrotonate. The mixture was heated to reflux for 1 h then cooled to 0 °C and quenched by the sequential dropwise addition of 0.5 mL of water, 0.5 mL of 15% aqueous sodium hydroxide, and 1.5 mL of water. The resulting mixture was filtered and filtrate was dried over anhydrous magnesium sulfate. The ether was carefully removed on a rotatory evaporator to afford 957 mg (66%) of crude 3-methyl-2-buten-1,1-d<sub>2</sub>-1-ol, contaminated with ether but judged to be approximately 90% pure by NMR analysis. This material was used in the next step without further purification. <sup>1</sup>H NMR (CDCl<sub>3</sub>): δ 1.68 (d, J = 1.2 Hz, 3 H), 1.74 (d, J = 1.2 Hz, 3 H), 5.40 (br s, 1 H).

1-Bromo-3-methyl-2-butene-1,1-d<sub>2</sub>.<sup>8</sup> To a mixture of 957 mg (10.8 mmol) of 3-methyl-2-buten-1,1-d<sub>2</sub>-1-ol and 15 mL of pentane under nitrogen at 0 °C was added 1.14 g (4.21 mmol) of phosphorus tribromide over a 20-min period. Stirring of the reaction mixture was continued for additional 2 min before addition of 1 mL (24.7 mmol) of ice-cold methanol. To that mixture 10 mL of 5% aqueous ice-cold sodium bicarbonate solution was added followed by washing the organic layer with 5 mL of ice-cold water and 5 mL of ice-cold brine. The pentane layer was dried over anhydrous magnesium sulfate. The solvent was removed on a rotatory evaporator, keeping the temperature at 0 °C, to afford 635 mg of crude 1-bromo-3-methyl-2-butene-1,1-d<sub>2</sub> (62%), judged to be approximately 90% pure by NMR analysis. The crude material was used in the next step without further purification. <sup>1</sup>H NMR (399.53 MHz, CDCl<sub>3</sub>): δ 1.73 (d, J = 1.3 Hz, 3 H), 1.78 (d, J = 1.3 Hz, 3 H), 5.52 (br s, 1 H).

N,N-Bis(methyl-d<sub>3</sub>)alanine, methyl ester. To a mixture of 1.00 g (11.55 mmol) of bis(methyl-d<sub>3</sub>)amine hydrogen chloride, 1 mL water and 600 mg (15 mmol) of sodium hydroxide at 0 °C was added a solution of 831 mg (4.98 mmol) of methyl 2-bromopropanoate in 2 mL of dichloromethane. After stirring overnight the reaction mixture was poured into 20 mL of water and extracted with three 25-mL portions of diethyl ether. The ether layers were combined and dried over anhydrous potassium carbonate, and the volatiles were removed on a rotatory evaporator to afford 459 mg (68%) of crude N,N-bis(methyl-d<sub>3</sub>)alanine, methyl ester, which was used in the next step without further purification. <sup>1</sup>H NMR (CDCl<sub>3</sub>): δ 1.27 (d, J = 7.0 Hz, 3 H), 3.22 (q, J = 7.0 Hz, 1 H), 3.70 (s, 3 H).

Ammonium salt 4-d<sub>8</sub>. To a mixture of 459 mg (3.35 mmol) of N,N-bis(methyl-d<sub>3</sub>)alanine, methyl ester and 2 mL of hexanes under nitrogen at room temperature was added 525 mg (3.48 mmol) of 1-bromo-3-methyl-2-butene-1,1-d<sub>2</sub>. The resulting mixture was stirred for 16 h. During the stirring some solid precipitated out from the solution. After the solid was dissolved in minimum amount of dichloromethane, approximately 1 mL of THF was added followed by 5 mL of hexanes. Then mixture was again stirred overnight to precipitate out the solid. This process was repeated twice to afford 596 mg (62%) of the ammonium salt (4-d<sub>8</sub>), contaminated with approximately 5% hexanes and a small amount of water: <sup>1</sup>H-NMR (CDCl<sub>3</sub>): δ 1.76 (d, J = 7.1 Hz, 3 H), 1.89 (s, 6 H), 3.83 (s, 3 H), 4.92 (q, J = 7.1 Hz, 1 H), 5.01 (br s, 1 H).

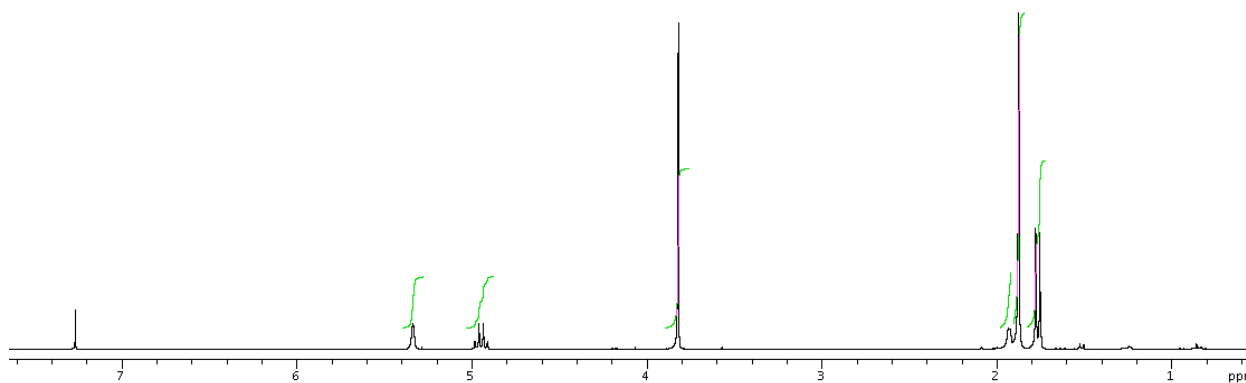

**Crossover rearrangement of 4 / 4-d<sub>8</sub>.** To a mixture of 280 mg (1.00 mmol) of **4**, 288 mg (1.00 mmol) of 4-d<sub>8</sub>, and 2.8 mL of acetonitrile (dried over calcium hydride followed by distilled under nitrogen) under nitrogen at 90 °C was added 570 mg (3.74 mmol) of DBU dropwise. The stirring of the reaction mixture continued for additional 1 h at 90 °C. After cooling to room temperature the reaction mixture was partitioned between 25 mL of ether and 25 mL of water. The ether layer was washed with five 25-mL portions of water and dried (Na<sub>2</sub>SO<sub>4</sub>), and the volatiles were removed on a rotary evaporator. The residue was flash chromatographed on silica gel using 20% ethyl acetate in hexanes as eluent, and the separated components **6** and **7** were characterized by <sup>1</sup>H-NMR and ESI-MS. In each case the extent of crossover was based on the relative intensities of the M=206 and M=208 peaks, averaging two measurements for **6** and three measurements for **7**, to obtain 4.9% and 17.9% for **6** and **7**, respectively.

Roughly similar results had initially been obtained for an alternatively labeled reactant, 4-d<sub>5</sub> with the methyl ester labeled with d<sub>3</sub> instead of the methyls of the amine. However, the results with 4-d<sub>5</sub> were compromised by a slow transesterification, while 4-d<sub>8</sub> is not susceptible to this problem.

### Simulation of the Crossover Results with a Kinetic Model, and Error Analysis.

As described in the main text, the crossover results were interpreted with a kinetic model. There are three experimental observables, the fraction of [2,3]-product **6** (0.804), the crossover in the [2,3]-product (0.049) and the crossover in the [1,2]-product **7** (0.1794). These values were predicted on an Excel™ spreadsheet using as variables  $\alpha$ ,  $\beta$ , and  $\gamma$  as defined in the main text, along with the ratio of **4** versus 4-d<sub>8</sub> in the starting mixture (0.56:0.44).

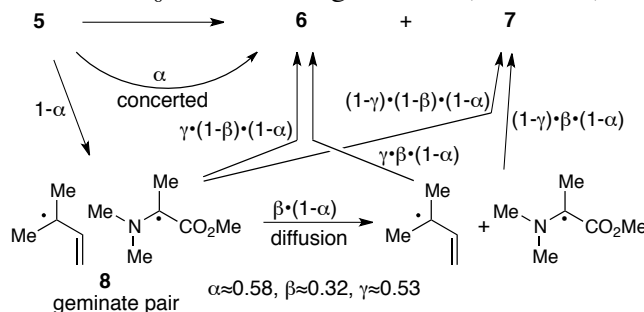

The following equations governed the simulation:

$$\mathbf{6-d_0} = A6 \cdot A4 + A4 \cdot B6 \cdot B8 \cdot A10 + A4 \cdot B6 \cdot A8 \cdot A10 \cdot A4$$

$$\mathbf{6-d_2} = B4 \cdot B6 \cdot A8 \cdot A10 \cdot A4$$

$$\mathbf{6-d_6} = B4 \cdot B6 \cdot A8 \cdot A10 \cdot A4$$

$$6-d_8: = A6*B4 + B4*B6*B8*A10 + B4*B6*A8*A10*B4$$

$$7-d_0: = A4*B6*B8*B10 + A4*B6*A8*B10*A4$$

$$7-d_2: = B4*B6*A8*B10*A4$$

$$7-d_6: = B4*B6*A8*B10*A4$$

$$7-d_8: = B4*B6*B8*B10 + B4*B6*A8*B10*B4$$

where

A4 is the proportion of **4** versus **4-d<sub>8</sub>** (0.56), B4 = 1-A4

A6 =  $\alpha$ , B6 = 1- $\alpha$

A8 =  $\beta$ , B8 = 1- $\beta$ ,

A10 =  $\gamma$ , B10 = 1- $\gamma$

The fraction of [2,3]-product **6** was then just calculated as **6-d<sub>6</sub>** (**6-d<sub>6</sub>** + **6-d<sub>8</sub>**)

(**6-d<sub>0</sub>** + **6-d<sub>2</sub>** + **6-d<sub>6</sub>** + **6-d<sub>8</sub>**) / (**6-d<sub>0</sub>** + **6-d<sub>2</sub>** + **6-d<sub>6</sub>** + **6-d<sub>8</sub>** + **7-d<sub>0</sub>** + **7-d<sub>2</sub>** + **7-d<sub>6</sub>** + **7-d<sub>8</sub>**)

The fraction of crossover in **6** was calculated as **6-d<sub>6</sub>** / (**6-d<sub>6</sub>** + **6-d<sub>8</sub>**).

The fraction of crossover in **7** was calculated as **7-d<sub>6</sub>** / (**7-d<sub>6</sub>** + **7-d<sub>8</sub>**).

The solver function in Excel™ was then used to minimize the difference between the experimental and model-predicted values (although this could also be done analytically, as the simulation is in effect three equations in three unknowns to fit three experimental values).

It is of interest to consider the possible sources of error and their effect on the results. One source of error is that some portion of the radicals that separate diffusionally will undergo side reactions and not lead to observed **6** or **7**. In this way, the amount of diffusional separation is underestimated. Although we have observed small amounts of side products that arise in this way in related reactions, we did not do so for the rearrangement of **5**. Due to the “persistent radical effect”, side reactions from radical-radical recombination are sometimes much less prevalent than might otherwise have been expected. Still, we assume that we have simply missed some small amount of side products.

To investigate the effect of the presumed missed side reactions, we redid the simulation assuming that only 50% of the diffusionally separated radicals end up as either **6** or **7**. With this assumption, the values of  $\alpha$ ,  $\beta$ , and  $\gamma$  change to 0.516, 0.485, and 0.528, respectively. This is a decrease in the amount of concerted rearrangement and an increase in the amount of diffusional separation, but the change would have no effect on the conclusions.

A second possible source of error is related to the assumption in the model that a constant portion  $\gamma$  of recombining radicals afford **6**, regardless of whether recombination occurs from the initial geminate pair or from diffusion together in solution. It is quite plausible that the geminate pair **8** would be created in a geometry that would favor formation of **6** over **7**, relative to **8** that arises from diffusion together in solution. To the extent that this is the case, the simulation will overestimate the amount of concerted rearrangement. It is notable then that both sources of error lead to an overestimate of the value of  $\alpha$ , resulting in our view that the  $\alpha$  value of 0.58 in the text is likely an upper limit.

### Synthesis and Rearrangement of 1-d<sub>5</sub>.

2-Propen-1,1-d<sub>2</sub>-1-ol and allyl bromide-d<sub>2</sub>.<sup>9</sup> To a mixture of 250 mL of diethyl ether (dried over sodium followed by distillation under nitrogen) and 2.50 g (60 mmol) of LiAlD<sub>4</sub> at 0 °C under nitrogen was added dropwise 9.05 g (100 mmol) of acryloyl chloride in 110 mL of dry



ether. The mixture was allowed to stir overnight at room temperature then quenched by the successive addition of 2.5 mL of 15% aqueous sodium hydroxide, 7.5 mL of water and 2.5 mL of 15% aqueous sodium hydroxide at 0 °C. The reaction mixture was filtered and the filtrate was dried over anhydrous magnesium sulfate, and the volatiles were removed on a rotatory evaporator using an ice-water bath to afford 1.8 g (30%) of crude propen-1,1-d<sub>2</sub>-1-ol.

The crude material was used in the next step without further purification. The deuterated alcohol was used to synthesize d<sub>2</sub>-allyl bromide using a reported procedure.<sup>9</sup> The resulting ratio of **A** to **B** was found to be 9:1 by NMR analysis.

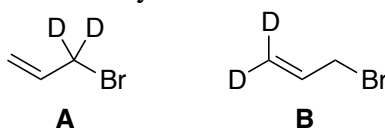

Methyl-d<sub>3</sub> bromoacetate.<sup>10</sup> To a mixture of 3.20 g (88.0 mmol) of d<sub>4</sub>-methanol, 4.50 g (44.0 mmol) of triethylamine and 10 mL of dichloromethane (dried over 3Å molecular sieves) under nitrogen at 0 °C was added dropwise slowly 8.80 g (43.96 mmol) of bromoacetyl bromide. The mixture was allowed to stir for 2 h, then quenched by the addition of 50 mL of 15% aqueous sulfuric acid at 0 °C. The organic layer was washed with two 25-mL portions of water and two 25-mL portions of saturated aqueous sodium bicarbonate solution. After drying over anhydrous magnesium sulfate the volatiles were removed on a rotatory evaporator to afford 6.1 g (90%) of crude methyl-d<sub>3</sub> bromoacetate contaminated with 6% CH<sub>2</sub>Cl<sub>2</sub>. <sup>1</sup>H NMR (CDCl<sub>3</sub>): δ 3.84 (s).

N,N-dimethylglycine methyl-d<sub>3</sub> ester. A mixture of 10.00 g (88.89 mmol) of 40% aqueous solution of dimethylamine and 4 mL of acetonitrile was cooled to 0 °C in an ice-bath. After cooling 6.00 g (38.5 mmol) of methyl-d<sub>3</sub> bromoacetate was added and the mixture was stirred at 0 °C for 12 h. The reaction mixture was then poured into 20 mL of water and the organics were extracted with three 50-mL portions of diethyl ether. The ether extracts were combined and dried over anhydrous sodium sulfate. The volatiles were then removed on a rotatory evaporator to afford 3.77 g (84%) of N,N-dimethylglycine methyl-d<sub>3</sub> ester contaminated with 8% acetonitrile based on NMR analysis. <sup>1</sup>H NMR (399.53 MHz, CDCl<sub>3</sub>): δ 2.33 (s, 6 H), 3.16 (s, 2 H),

Ammonium salt 1-d<sub>5</sub>. To a mixture of 292 mg (2.43 mmol) of N,N-dimethylglycine methyl-d<sub>3</sub> ester and 2 mL of ether (dried over sodium followed by distillation under nitrogen) under nitrogen at room temperature was added 300 mg (2.43 mmol) of d<sub>2</sub>-allyl bromide. The resulting mixture was stirred overnight. During the stirring solid precipitated out from the solution. The volatiles were removed under vacuum to afford 459 mg (78%) of crude ammonium salt 1-d<sub>5</sub> (**C** and **D**), judged to be more than 95% pure by comparing NMR of the unlabeled **1**. The ratio of **C** to **D** was found to be (10:7) by NMR analysis.

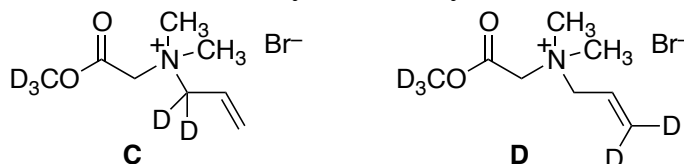

In the <sup>1</sup>H NMR spectrum of **C** / **D** below, the non-integrated peaks are CHCl<sub>3</sub> (7.26) and water (1.65). Traces of diethyl ether can be seen in the baseline.

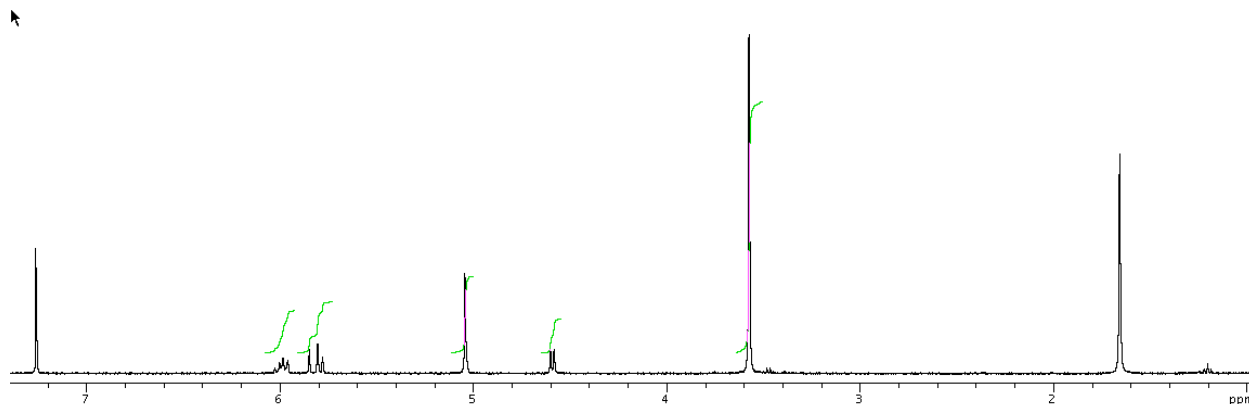

**Crossover rearrangement of **1** / **1-d<sub>5</sub>**.** To a mixture of 249 mg (1.05 mmol) of **1**, 252 mg (1.05 mmol) of **1-d<sub>5</sub>** and 3.0 mL of N,N-dimethylformamide (dried over 3Å molecular sieves) under nitrogen at room temperature was added 600 mg (3.94 mmol) of DBU dropwise. The stirring of the reaction mixture continued for additional 1 h at room temperature before the reaction mixture was partitioned between 25 mL of ether and 25 mL of water. The ether layer was washed with three 25-mL portions of water. Then the ether layer was dried over sodium sulfate. After removing the volatiles on a rotatory evaporator residue was analyzed by <sup>1</sup>H-NMR and ESI-MS. The M+3 peak that would be associated with crossover was not detectable in the ESI-MS.

### Synthesis and Rearrangement of **1-d<sub>2</sub>**.

**Ammonium salt **1-d<sub>2</sub>**.** To a mixture of 680 mg (5.81 mmol) of N,N-dimethylglycine methyl ester and 5 mL of ether (dried over sodium followed by distillation under nitrogen) under nitrogen at room temperature was added 685 mg (5.57 mmol) of d<sub>2</sub>-allyl bromide. The resulting mixture was stirred overnight. During the stirring solid precipitated out from the solution. The volatiles were removed under vacuum to afford 748 mg (55%) of crude ammonium salt **1-d<sub>2</sub>** (**E** and **F**), judged to be more than 95% pure by comparing NMR of the unlabeled **1**. The ratio of **E** to **F** was found to be (10:1) by NMR analysis.

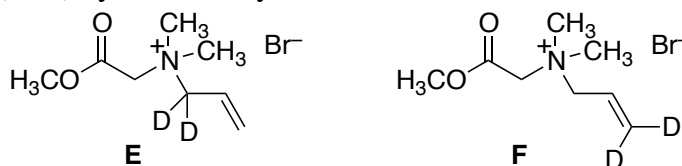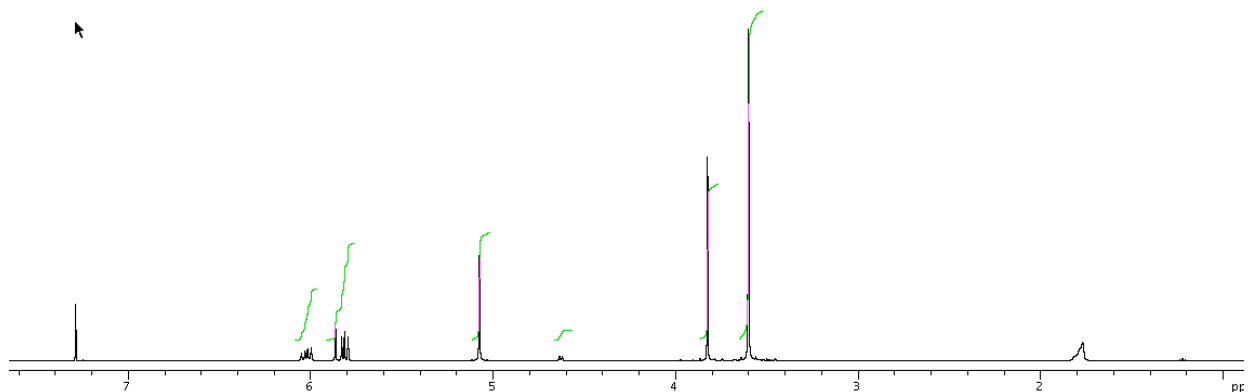

**DBU mediated rearrangement **1-d<sub>2</sub>**.** To a mixture of 1.0 mL of N,N-dimethylformamide (dried over 3Å molecular sieves) and 238 mg (1.00 mmol) of **1-d<sub>2</sub>** (ratio of **E** to **F** is 10:1) under



In particular, the subroutine *mepout* was modified to output frequencies with higher precision, and the utility program *shuttle* was modified to save copies of all frequency calculations so that data could be extracted from them later.

To show the complete set of options selected for these calculations, a sample set of input files for GAUSSRATE / POLYRATE are given in a later section. For the sake of simplicity, the starting material in these calculations was generally taken to be the conformer of **2** obtained from a steepest-descent path in mass-weighted coordinates starting at the transition structure. This conformer is not the lowest-energy conformer of the starting material and it is in any case not an appropriate starting material for the calculation of the experimental isotope effect (where **1** is the appropriate starting material), but this does not matter for the purpose at hand of calculating canonical variational transition state theory (CVT) transition structures and CVT / small-curvature tunneling (CVT/SCT) corrections to the conventional TST isotope effects.

The starting materials for variational TST calculations for the [2,3]-rearrangement of **5** and cleavage of **5** were also different. In figuring out the relative rate constants for [2,3]-rearrangement versus cleavage, the difference in starting materials was allowed for in a normal way based on the calculated free energies for the differing starting materials.

### **KIE Predictions**

For the various transition structures (the potential-energy saddle points) versus the appropriate lowest-energy conformation of **1**, we first calculated conventional TST isotope effects by the method of Bigeleisen and Mayer<sup>18</sup> using the program QUIVER.<sup>19</sup> Due to the diversity of computational methods and basis sets employed, along with the questionable applicability of any particular literature scaling factor to carbon isotope effects, we opted to use a single scaling factor of 0.9614 in all cases. The choice of scaling factor has a negligible effect on all of the predicted isotope effects except those at C<sup>3</sup>, and for C<sup>3</sup> the choice of scaling factor within a reasonable range affected the predicted KIE by no more than 0.002.

The isotope effects obtained from conventional transition state theory were then corrected for tunneling and variational transition state effects based on results from GAUSSRATE. It was not practical to carry out GAUSSRATE calculations with more than a few of the computational methods employed, so we employed a composite method of correcting the conventional TST KIEs calculated at the various methods by corrections calculated in B3LYP-D2/6-31G\*/PCM calculations. The rate constants obtained from GAUSSRATE were used to calculate both “gaussrate-TST” and “gaussrate-CVT/SCT” isotope effects, then the ratio of the gaussrate-CVT/SCT and gaussrate-TST isotope effects was used as the correction factor to turn the conventional TST isotope effects obtained from QUIVER into CVT-SCT isotope effects based appropriately on the starting **1**.

**Table S3. KIE Predictions (25 °C,  $k_{12C}/k_{13C}$ ) versus C<sup>3</sup>-N and C<sup>1</sup>-C<sup>5</sup> Distances.**

| Method    | Basis Set | Solvent Model | C <sup>3</sup> -N distance | C <sup>1</sup> -C <sup>5</sup> distance | C <sup>5</sup> KIE | C <sup>3</sup> KIE | C <sup>1</sup> KIE | C <sup>6</sup> KIE |
|-----------|-----------|---------------|----------------------------|-----------------------------------------|--------------------|--------------------|--------------------|--------------------|
| wB97      | 6-31G*    | PCM           | 1.90                       | 2.28                                    | 1.023              | 1.042              | 1.021              | 1.008              |
| M11       | 6-31G*    | PCM           | 1.96                       | 2.36                                    | 1.017              | 1.040              | 1.019              | 1.009              |
| wB97X     | 6-31G*    | PCM           | 1.99                       | 2.40                                    | 1.018              | 1.044              | 1.018              | 1.008              |
| lc-B97D   | 6-31G*    | PCM           | 2.07                       | 2.42                                    | 1.019              | 1.043              | 1.020              | 1.010              |
| wB97X     | 6-31+G**  | PCM           | 2.04                       | 2.43                                    | 1.017              | 1.045              | 1.018              | 1.011              |
| M11       | 6-31G*    | gas phase     | 1.948                      | 2.435                                   | 1.015              | 1.040              | 1.017              | 1.007              |
| M06-2X    | 6-31+G**  | PCM           | 2.03                       | 2.46                                    | 1.015              | 1.045              | 1.017              | 1.011              |
| SOGGA11X  | 6-31G*    | PCM           | 2.04                       | 2.51                                    | 1.016              | 1.046              | 1.017              | 1.009              |
| wB97XD    | 6-31G*    | PCM           | 2.04                       | 2.51                                    | 1.015              | 1.045              | 1.017              | 1.009              |
| wB97XD    | 6-31+G**  | PCM           | 2.09                       | 2.53                                    | 1.015              | 1.045              | 1.018              | 1.011              |
| M06-2X    | 6-31+G**  | GAS           | 1.999                      | 2.534                                   | 1.014              | 1.045              | 1.016              | 1.008              |
| N12SX     | 6-31G*    | PCM           | 2.032                      | 2.55                                    | 1.013              | 1.047              | 1.016              | 1.009              |
| PBE0-D3   | 6-31G*    | PCM           | 2.028                      | 2.57                                    | 1.013              | 1.046              | 1.016              | 1.009              |
| SOGGA11X  | 6-31G*    | gas phase     | 2.014                      | 2.578                                   | 1.014              | 1.047              | 1.015              | 1.007              |
| PBE0      | 6-31+G**  | PCM           | 2.073                      | 2.593                                   | 1.012              | 1.049              | 1.015              | 1.011              |
| WB97XD    | 6-31+G**  | gas phase     | 2.048                      | 2.6                                     | 1.012              | 1.048              | 1.014              | 1.008              |
| M06-D3    | 6-31G*    | PCM           | 2.098                      | 2.609                                   | 1.012              | 1.047              | 1.015              | 1.010              |
| N12SX     | 6-31G*    | gas phase     | 1.997                      | 2.617                                   | 1.012              | 1.047              | 1.014              | 1.007              |
| MN12SX    | 6-31G*    | PCM           | 2.111                      | 2.623                                   | 1.012              | 1.049              | 1.016              | 1.010              |
| APFD      | 6-31G*    | PCM           | 2.045                      | 2.625                                   | 1.015              | 1.044              | 1.016              | 1.007              |
| PBE0-D3   | 6-31G*    | gas phase     | 1.991                      | 2.642                                   | 1.012              | 1.047              | 1.014              | 1.007              |
| M06       | 6-31+G**  | PCM           | 2.14                       | 2.65                                    | 1.010              | 1.050              | 1.014              | 1.011              |
| M06-D3    | 6-31G*    | gas phase     | 2.064                      | 2.66                                    | 1.011              | 1.047              | 1.014              | 1.007              |
| PBE0      | 6-31+G**  | GAS           | 2.029                      | 2.665                                   | 1.01               | 1.049              | 1.014              | 1.008              |
| APFD      | 6-31G*    | gas phase     | 2.001                      | 2.684                                   | 1.011              | 1.053              | 1.010              | 1.005              |
| MN12SX    | 6-31G*    | gas phase     | 2.076                      | 2.684                                   | 1.012              | 1.049              | 1.014              | 1.008              |
| B971      | 6-31G*    | PCM           | 2.08                       | 2.70                                    | 1.011              | 1.046              | 1.015              | 1.010              |
| B98       | 6-31G*    | PCM           | 2.09                       | 2.70                                    | 1.011              | 1.046              | 1.015              | 1.010              |
| B3LYP-D2  | 6-31G*    | PCM           | 2.115                      | 2.708                                   | 1.011              | 1.046              | 1.015              | 1.009              |
| M06       | 6-31+G**  | GAS           | 2.084                      | 2.708                                   | 1.009              | 1.051              | 1.012              | 1.008              |
| B972      | 6-31G*    | PCM           | 2.08                       | 2.71                                    | 1.011              | 1.048              | 1.014              | 1.010              |
| B3LYP-D2  | 6-31+G**  | SMD           | 2.14                       | 2.72                                    | 1.012              | 1.049              | 1.015              | 1.012              |
| MN12L     | 6-31G*    | PCM           | 2.182                      | 2.723                                   | 1.012              | 1.051              | 1.015              | 1.010              |
| B3LYP-D2  | 6-31+G**  | PCM           | 2.15                       | 2.73                                    | 1.010              | 1.047              | 1.015              | 1.011              |
| B971      | 6-31+G**  | PCM           | 2.128                      | 2.729                                   | 1.011              | 1.047              | 1.016              | 1.011              |
| B98       | 6-31+G**  | PCM           | 2.13                       | 2.73                                    | 1.011              | 1.046              | 1.016              | 1.012              |
| B972      | 6-31+G**  | PCM           | 2.112                      | 2.74                                    | 1.009              | 1.050              | 1.014              | 1.012              |
| M11L      | 6-31G*    | PCM           | 2.127                      | 2.756                                   | 1.010              | 1.052              | 1.017              | 1.011              |
| BP86-D2   | 6-31G*    | PCM           | 2.077                      | 2.769                                   | 1.010              | 1.045              | 1.014              | 1.008              |
| B3LYP-D3  | 6-31G*    | PCM           | 2.102                      | 2.77                                    | 1.011              | 1.046              | 1.014              | 1.010              |
| PBEPBE-D2 | 6-31G*    | PCM           | 2.06                       | 2.776                                   | 1.009              | 1.046              | 1.013              | 1.008              |
| MN12L     | 6-31G*    | gas phase     | 2.125                      | 2.777                                   | 1.011              | 1.051              | 1.013              | 1.008              |
| B3LYP-D2  | 6-31G*    | gas phase     | 2.062                      | 2.789                                   | 1.010              | 1.047              | 1.013              | 1.007              |
| B3LYP     | 6-31G*    | PCM           | 2.103                      | 2.791                                   | 1.010              | 1.048              | 1.013              | 1.010              |
| N12       | 6-31G*    | PCM           | 2.035                      | 2.806                                   | 1.009              | 1.050              | 1.011              | 1.009              |
| B971      | 6-31+G**  | gas phase     | 2.067                      | 2.816                                   | 1.009              | 1.049              | 1.012              | 1.008              |
| B3LYP     | 6-31+G**  | PCM           | 2.14                       | 2.82                                    | 1.009              | 1.049              | 1.013              | 1.012              |
| B972      | 6-31+G**  | gas phase     | 2.045                      | 2.822                                   | 1.009              | 1.050              | 1.012              | 1.009              |
| M11L      | 6-31G*    | gas phase     | 2.092                      | 2.823                                   | 1.009              | 1.052              | 1.016              | 1.009              |
| N12       | 6-31+G**  | PCM           | 2.07                       | 2.836                                   | 1.007              | 1.051              | 1.011              | 1.011              |

|           |          |           |       |       |       |       |        |       |
|-----------|----------|-----------|-------|-------|-------|-------|--------|-------|
| B3LYP-D3  | 6-31G*   | gas phase | 2.038 | 2.864 | 1.010 | 1.046 | 1.012  | 1.007 |
| N12       | 6-31G*   | gas phase | 1.977 | 2.869 | 1.008 | 1.050 | 1.0091 | 1.007 |
| BP86-D2   | 6-31G*   | gas phase | 1.985 | 2.88  | 1.008 | 1.046 | 1.010  | 1.006 |
| PBEPBE-D2 | 6-31G*   | gas phase | 1.978 | 2.88  | 1.008 | 1.047 | 1.010  | 1.006 |
| B3LYP     | 6-31+G** | gas phase | 2.058 | 2.911 | 1.008 | 1.049 | 1.011  | 1.009 |
| BLYP-D2   | 6-31G*   | PCM       | 2.061 | 2.953 | 1.008 | 1.047 | 1.009  | 1.008 |
| B97D      | 6-31G*   | PCM       | 2.04  | 2.96  | 1.008 | 1.048 | 1.0087 | 1.009 |
| B97D      | 6-31+G** | PCM       | 2.063 | 2.965 | 1.007 | 1.049 | 1.009  | 1.010 |
| SOGGA11   | 6-31G*   | PCM       | 2.04  | 2.97  | 1.007 | 1.045 | 1.013  | 1.009 |
| B97D      | 6-31+G** | PCM       | 2.06  | 2.97  | 1.007 | 1.049 | 1.0089 | 1.011 |
| B97D3     | 6-31G*   | PCM       | 1.953 | 3.001 | 1.008 | 1.050 | 1.005  | 1.009 |
| B97D      | 6-31+G** | gas phase | 1.911 | 3.056 | 1.007 | 1.049 | 1.006  | 1.007 |
| BLYP-D2   | 6-31G*   | gas phase | 1.862 | 3.062 | 1.008 | 1.046 | 1.005  | 1.006 |
| SOGGA11   | 6-31G*   | gas phase | 1.951 | 3.135 | 1.007 | 1.046 | 1.008  | 1.007 |

### Exploration of DFT and ab initio Methods

The applicability of computational methods to the reactions of interest was explored in detail by a series of studies with varying goals. One goal was to gauge the direction of and magnitude of systematic errors in the energies of **9**<sup>‡</sup> versus **10**<sup>‡</sup>. Another goal was to determine the best practical choice of method for trajectory calculations, and, with the expectation that no method would be entirely satisfactory for what is a difficult computational problem, minimize and gauge the direction of systematic errors.

In general terms we used two methods to evaluate computational methods. From an experimental perspective we considered whether the computational methods led to predictions of kinetic isotope effects for the rearrangement of **2** that were reasonably consistent with experimental observations. This was true of approximately half of the methods explored, as may be discerned from the table in the previous section. M06-2X calculations *did not* lead to a reasonable prediction of the isotope effects, but we explored these calculations in detail because the direction of their error was clear (too tight of transition state, too high of a barrier for bond cleavage) and it was viewed as significant that despite the direction of the error, M06-2X trajectories through **9**<sup>‡</sup> still gave a mixture of rearrangement and bond cleavage.

The second method for the evaluation of computational methods was based on a comparison of energetics versus (U)BD(T)<sup>20</sup> single-point energies performed with the largest feasible basis set. Although (U)BD(T) calculations are still incomplete in their description of systems having diradical character, we have previously noted their reasonable accuracy, as have others.<sup>21,22</sup> As a check for the current work, we explored that use of (U)BD(T) calculations for the dissociation of the C-H bond in ethane and the central carbon-carbon bond of 1,5-hexadiene. When the basis set is too small (e.g. 6-31G\*, cc-pvdz) the (U)BD(T) calculations unsurprisingly underestimate the barriers for these dissociations, but medium-sized basis sets (6-311+G\*\*, aug-cc-pvdz) perform well and cc-pvtz or larger performs very well versus known experimental data. Further, the (U)BD(T) calculations provide a smooth energy curve with no apparent anomalies.

It was not practical to carry out (U)BD(T) calculations with a good basis set on the reactions of either **2** or **5**, so we employed the model reactions of **A** and **B**.

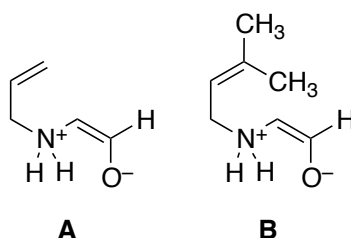

### Energetics of [2,3]-Rearrangement versus Bond Cleavage in Structures **A** and **B**.

To gauge the direction of and magnitude of systematic errors in the energies of **9**<sup>‡</sup> versus **10**<sup>‡</sup>, we explored the barriers for the [2,3]-rearrangement versus C-N bond cleavage in the models **A** and **B**. This was done using single-point calculations on a set of three structures in each system obtained in (U)M06/631+G\*\* (gas phase) calculations: the starting **A** or **B**, the exo s-cis transition structure for the [2,3]-rearrangement of **A** or **B**, and the lowest-energy transition structure for the C-N bond cleavage of **A** or **B**.

Table S4 below summarizes the results. For each system, the table first presents the absolute energies and calculated barriers in the UBD(T) calculations with a series of basis sets. (The closed-shell starting structures **A** and **B** were in each case calculated using RBD(T)). The table then presents the corresponding energies, calculated on the same geometries, for DFT methods. The “Bias favoring cleavage” was defined by comparing the relative barrier for cleavage versus rearrangement as calculated by the DFT methods versus those calculation by the UBD(T) calculations with a cc-pvtz basis set for system **A** and an aug-cc-pvdz basis set for system **B**. It can be noted that in each case the DFT calculations appear to overestimate the facility of the cleavage process.

**Table S4.** UBD(T) versus DFT methods for [2,3]-rearrangement versus bond cleavage

| Structure   | Method             | P.E. Barrier | Relative Cleavage Barrier | Bias favoring cleavage |
|-------------|--------------------|--------------|---------------------------|------------------------|
|             | UBD(T)/6-31+G**    |              |                           |                        |
| <b>A</b>    | -324.968154        |              |                           |                        |
| [2,3]-TS    | -324.944803        | 14.7         |                           |                        |
| cleavage ts | -324.927008        | 25.8         | 11.2                      |                        |
|             | UBD(T)/6-311+G**   |              |                           |                        |
| <b>A</b>    | -325.086484        |              |                           |                        |
| [2,3]-TS    | -325.063202        | 14.6         |                           |                        |
| cleavage ts | -325.044343        | 26.4         | 11.8                      |                        |
|             | UBD(T)/aug-cc-pvdz |              |                           |                        |
| <b>A</b>    | -325.029883        |              |                           |                        |
| [2,3]-TS    | -325.008653        | 13.3         |                           |                        |
| cleavage ts | -324.988515        | 26.0         | 12.6                      |                        |
|             | UBD(T)/cc-pvtz     |              |                           |                        |
| <b>A</b>    | -325.291245        |              |                           |                        |
| [2,3]-TS    | -325.267234        | 15.1         |                           |                        |
| cleavage ts | -325.247319        | 27.6         | 12.5                      |                        |
|             | DFT methods        |              |                           |                        |

|             | (U)M06/6-31+G**      |              |                           |                        |
|-------------|----------------------|--------------|---------------------------|------------------------|
| <b>A</b>    | -325.637319          |              |                           |                        |
| [2,3]-TS    | -325.616474          | 13.1         |                           |                        |
| cleavage ts | -325.603027          | 21.5         | 8.4                       | 4.1                    |
|             | (U)M062X/6-31+G**    |              |                           |                        |
| <b>A</b>    | -325.706939          |              |                           |                        |
| [2,3]-TS    | -325.681698          | 15.8         |                           |                        |
| cleavage ts | -325.664881          | 26.4         | 10.6                      | 1.9                    |
|             | (U)B3LYP/6-31+G**    |              |                           |                        |
| <b>A</b>    | -325.868930          |              |                           |                        |
| [2,3]-TS    | -325.851119          | 11.2         |                           |                        |
| cleavage ts | -325.842746          | 16.4         | 5.3                       | 7.2                    |
|             | (U)B3LYP/6-31+G**/D2 |              |                           |                        |
| <b>A</b>    | -325.882674          |              |                           |                        |
| [2,3]-TS    | -325.869143          | 8.5          |                           |                        |
| cleavage ts | -325.856733          | 16.3         | 7.8                       | 4.7                    |
| Structure   | Method               | P.E. Barrier | Relative Cleavage Barrier | Bias favoring cleavage |
|             | UBD(T)/6-31+G**      |              |                           |                        |
| <b>B</b>    | -403.377433          |              |                           |                        |
| [2,3]-TS    | -403.352115          | 15.9         |                           |                        |
| cleavage ts | -403.335068          | 26.6         | 10.7                      |                        |
|             | UBD(T)/6-311+G**     |              |                           |                        |
| <b>B</b>    | -403.522106          |              |                           |                        |
| [2,3]-TS    | -403.496345          | 16.2         |                           |                        |
| cleavage ts | -403.478526          | 27.3         | 11.2                      |                        |
|             | UBD(T)/aug-cc-pvdz   |              |                           |                        |
| <b>B</b>    | -403.450655          |              |                           |                        |
| [2,3]-TS    | -403.427451          | 14.6         |                           |                        |
| cleavage ts | -403.407668          | 27.0         | 12.4                      |                        |
|             | DFT methods          |              |                           |                        |
|             | (U)M06/6-31+G**      |              |                           |                        |
| <b>B</b>    | -404.216812          |              |                           |                        |
| [2,3]-TS    | -404.194027          | 14.3         |                           |                        |
| cleavage ts | -404.181690          | 22.0         | 7.7                       | 4.7                    |
|             | (U)M062X/6-31+G**    |              |                           |                        |
| <b>B</b>    | -404.308210          |              |                           |                        |
| [2,3]-TS    | -404.279571          | 18.0         |                           |                        |
| cleavage ts | -404.264754          | 27.3         | 9.3                       | 3.1                    |
|             | (U)B3LYP/6-31+G**    |              |                           |                        |
| <b>B</b>    | -404.512971          |              |                           |                        |
| [2,3]-TS    | -404.491524          | 13.5         |                           |                        |
| cleavage ts | -404.486286          | 16.7         | 3.3                       | 9.1                    |



|             |                      |      |     |     |
|-------------|----------------------|------|-----|-----|
|             | (U)B3LYP/6-31+G**/D2 |      |     |     |
| <b>B</b>    | -404.536481          |      |     |     |
| [2,3]-TS    | -404.521091          | 9.7  |     |     |
| cleavage ts | -404.509314          | 17.0 | 7.4 | 5.0 |

### The Energy Surface for Cleavage During Trajectory Calculations

To be practical, trajectory calculations were limited to DFT surfaces with a moderate or small basis set. In gauging the appropriateness of energy surfaces for the purpose at hand, it was not considered to be critically important that the surface correctly calculate the absolute barrier for the rearrangement. B3LYP calculations in particular underestimate the barrier for the rearrangement since they underestimate the strength of  $\sigma$  bonds relative to  $\pi$  bonds.

Of much greater importance in our view was the shape of the energy surface in the area of the [2,3]-rearrangement transition structure and the energy change as bond cleavage proceeds from the rearrangement transition structure versus that for consummation of the rearrangement. To assess this issue, we developed a representative grid of geometries by fixing the C<sup>3</sup>-N and C<sup>1</sup>-C<sup>5</sup> distances and optimizing the structure in UB3LYP/6-31G\* calculations. Single-point energies were then carried out on these structures at a variety of levels.

Tables S5 and S6 present the results of those calculations, first as absolute energies and then as relative energies. We will then present the results graphically and discuss them.

**Table S5.** Absolute energies for single points for a grid of representative geometries

| C3-N distance | C1-C5 distance | D2         |            | D2         |            | RB3LYP     | UM06       |
|---------------|----------------|------------|------------|------------|------------|------------|------------|
|               |                | UB3LYP     | corrected  | UB3LYP     | corrected  |            |            |
|               |                | 6-31G*     | 6-31G*     | 6-31+G**   | 6-31+G**   | 6-31G*     | 6-31G*     |
| 2             | 3.0            | -325.81406 | -325.83106 | -325.85154 | -325.86854 | -325.81406 | -325.58320 |
| 2.1           | 3.0            | -325.81324 | -325.83041 | -325.85104 | -325.86821 | -325.81324 | -325.58134 |
| 2.2           | 3.0            | -325.81269 | -325.82987 | -325.85092 | -325.86810 | -325.81269 | -325.58016 |
| 2.3           | 3.0            | -325.81222 | -325.82929 | -325.85095 | -325.86801 | -325.81222 | -325.57997 |
| 2.4           | 3.0            | -325.81197 | -325.82880 | -325.85106 | -325.86789 | -325.81175 | -325.58053 |
| 2.6           | 3.0            | -325.81258 | -325.82892 | -325.85200 | -325.86834 | -325.81055 | -325.58205 |
| 2.8           | 3.0            | -325.81259 | -325.82986 | -325.85202 | -325.86757 | -325.80934 | -325.58298 |
| 3             | 3.0            | -325.81547 | -325.83057 | -325.85323 | -325.86833 | -325.80857 | -325.58399 |
| 2.8           | 2.8            | -325.81643 | -325.83303 | -325.85368 | -325.87027 |            | -325.58537 |
| 2.8           | 2.6            | -325.82121 | -325.83832 | -325.85783 | -325.87493 |            | -325.58905 |
| 2.8           | 2.4            | -325.82771 | -325.84527 | -325.86373 | -325.88129 |            | -325.59641 |
| 2.8           | 2.2            | -325.83569 | -325.85355 | -325.87097 | -325.88883 |            | -325.60666 |

  

| C3-N distance | C1-C5 distance | UM062X     | UB97D      | UwB97XD    | UPBE1PBE   | UBD(T)     | UBD(T)     |
|---------------|----------------|------------|------------|------------|------------|------------|------------|
|               |                | 6-31G*     | 6-31G*     | 6-31G*     | 6-31G*     | 6-31+G**   | 6-31+G**   |
| 2.0           | 3.0            | -325.64996 | -325.60470 | -325.69903 | -325.42580 | -324.94459 | -325.06263 |
| 2.1           | 3.0            | -325.64733 | -325.60522 | -325.69651 | -325.42402 | -324.94388 | -325.06187 |

|     |     |            |            |            |            |            |            |
|-----|-----|------------|------------|------------|------------|------------|------------|
| 2.2 | 3.0 | -325.64519 | -325.60559 | -325.69494 | -325.42264 | -324.94357 | -325.06139 |
| 2.3 | 3.0 | -325.64355 | -325.60569 | -325.69506 | -325.42176 | -324.94118 | -325.05891 |
| 2.4 | 3.0 | -325.64304 | -325.60559 | -325.69603 | -325.42171 | -324.93995 | -325.05767 |
| 2.6 | 3.0 | -325.64412 | -325.60487 | -325.69830 | -325.42253 | -324.93999 | -325.05768 |
| 2.8 | 3.0 | -325.64499 | -325.60456 | -325.69982 | -325.42385 | -324.93916 | -325.05745 |
| 3.0 | 3.0 | -325.64645 | -325.60378 | -325.70150 | -325.42515 | -324.94061 | -325.05875 |
| 2.8 | 2.8 | -325.64671 | -325.60961 |            |            | -324.94146 | -325.06028 |
| 2.8 | 2.6 | -325.65231 | -325.61429 |            |            | -324.94887 | -325.06821 |
| 2.8 | 2.4 | -325.66238 | -325.61919 |            |            | -324.95847 |            |
| 2.8 | 2.2 | -325.67411 | -325.62488 |            |            | -324.96777 |            |

**Table S6.** Relative energies for single points for a grid of representative geometries

| C3-N<br>distance | C1-C5<br>distance | D2 corrected |           | D2 corrected |           | RESTRICTED | UM06            |
|------------------|-------------------|--------------|-----------|--------------|-----------|------------|-----------------|
|                  |                   | UB3LYP       | UB3LYP    | UB3LYP       | UB3LYP    | B3LYP      |                 |
|                  |                   | 6-31G*       | 6-31G*    | 6-31+G**     | 6-31+G**  | 6-31G*     | 6-31G*          |
| 2                | 3.0               | 0.00         | 0.00      | 0.00         | 0.00      | 0.00       | 0.00            |
| 2.1              | 3.0               | 0.51         | 0.41      | 0.31         | 0.21      | 0.51       | 1.16            |
| 2.2              | 3.0               | 0.86         | 0.75      | 0.39         | 0.28      | 0.86       | 1.90            |
| 2.3              | 3.0               | 1.15         | 1.12      | 0.37         | 0.33      | 1.15       | 2.02            |
| 2.4              | 3.0               | 1.31         | 1.42      | 0.30         | 0.41      | 1.45       | 1.67            |
| 2.6              | 3.0               | 0.93         | 1.35      | -0.29        | 0.13      | 2.20       | 0.72            |
| 2.8              | 3.0               | 0.93         | 0.76      | -0.30        | 0.61      | 2.96       | 0.14            |
| 3                | 3.0               | -0.88        | 0.31      | -1.06        | 0.13      | 3.45       | -0.50           |
| 2.8              | 2.8               | -1.49        | -1.23     | -1.34        | -1.09     |            | -1.37           |
| 2.8              | 2.6               | -4.49        | -4.55     | -3.95        | -4.01     |            | -3.68           |
| 2.8              | 2.4               | -8.56        | -8.91     | -7.65        | -8.00     |            | -8.29           |
| 2.8              | 2.2               | -13.57       | -14.11    | -12.19       | -12.73    |            | -14.73          |
|                  | Graph<br>legend:  | UB3/SB       | D2 UB3/SB | UB3/PS       | D2-UB3/PS | RB3/SB     | UM06/6-<br>31G* |
| C3-N<br>distance | C1-C5<br>distance | UM062X       | UB97D     | UwB97XD      | UPBE1PBE  | UBD(T)     | UBD(T)          |
|                  |                   | 6-31G*       | 6-31G*    | 6-31G*       | 6-31G*    | 6-31+G**   | 6-311+G**       |
| 2                | 3.0               | 0.00         | 0.00      | 0.00         | 0.00      | 0.00       | 0.00            |
| 2.1              | 3.0               | 1.65         | -0.33     | 1.59         | 1.12      | 0.44       | 0.48            |
| 2.2              | 3.0               | 3.00         | -0.56     | 2.57         | 1.98      | 0.64       | 0.78            |
| 2.3              | 3.0               | 4.02         | -0.62     | 2.49         | 2.53      | 2.14       | 2.34            |
| 2.4              | 3.0               | 4.34         | -0.56     | 1.89         | 2.56      | 2.91       | 3.11            |
| 2.6              | 3.0               | 3.66         | -0.11     | 0.46         | 2.05      | 2.89       | 3.11            |
| 2.8              | 3.0               | 3.12         | 0.09      | -0.49        | 1.22      | 3.41       | 3.25            |
| 3                | 3.0               | 2.20         | 0.58      | -1.55        | 0.41      | 2.50       | 2.44            |
| 2.8              | 2.8               | 2.04         | -3.08     |              |           | 1.96       | 1.48            |
| 2.8              | 2.6               | -1.47        | -6.02     |              |           | -2.69      | -3.50           |
| 2.8              | 2.4               | -7.79        | -9.09     |              |           | -8.71      |                 |

|     |         |          |        |                      |          |           |           |
|-----|---------|----------|--------|----------------------|----------|-----------|-----------|
| 2.8 | 2.2     | -15.16   | -12.66 |                      |          | -14.54    |           |
|     | Graph   | UM062X/6 |        | UwB97XD\<br>6-31G(d) | UPBE1PBE | UBD(T)/PS | UBD(T)/BB |
|     | legend: | -31G*    | UB97D  |                      |          |           |           |

For the graph below, the relative energies of the single points are plotted versus the first point in the series. The legend can be understood with reference to the table above, where the graph legends are listed in the column containing the data. As observations, we note that UM06-2X has too large of a barrier to dissociation in the grid of representative geometries, yet UM06-2X trajectories still lead to substantial amounts of dissociation. None of the DFT methods are entirely satisfactory matched for the UBD(T)/6-311+G\*\* results. However, the UB3LYP-D2/6-31G\* results exhibit a feature in common with the UBD(T) results but not present in the other DFT methods, namely a relatively distant maximum in energy (at grid points 5 and 6 in UB3LYP-D2/6-31G\*, grid points 6 and 7 in UBD(T)/6-311+G\*\*, but earlier in most other methods).

For this reason, along with relatively good predictions of the experimental kinetic isotope effects, we considered the UB3LYP-D2/6-31G\* as the best choice for trajectories. Even so, the UB3LYP-D2/6-31G\* surface underestimates the energy-maximum for dissociation (relative to the saddle point) in the model by about 1.5 kcal/mol, so it is not surprising that the trajectories afford too much dissociation versus that suggested by the crossover experiments.

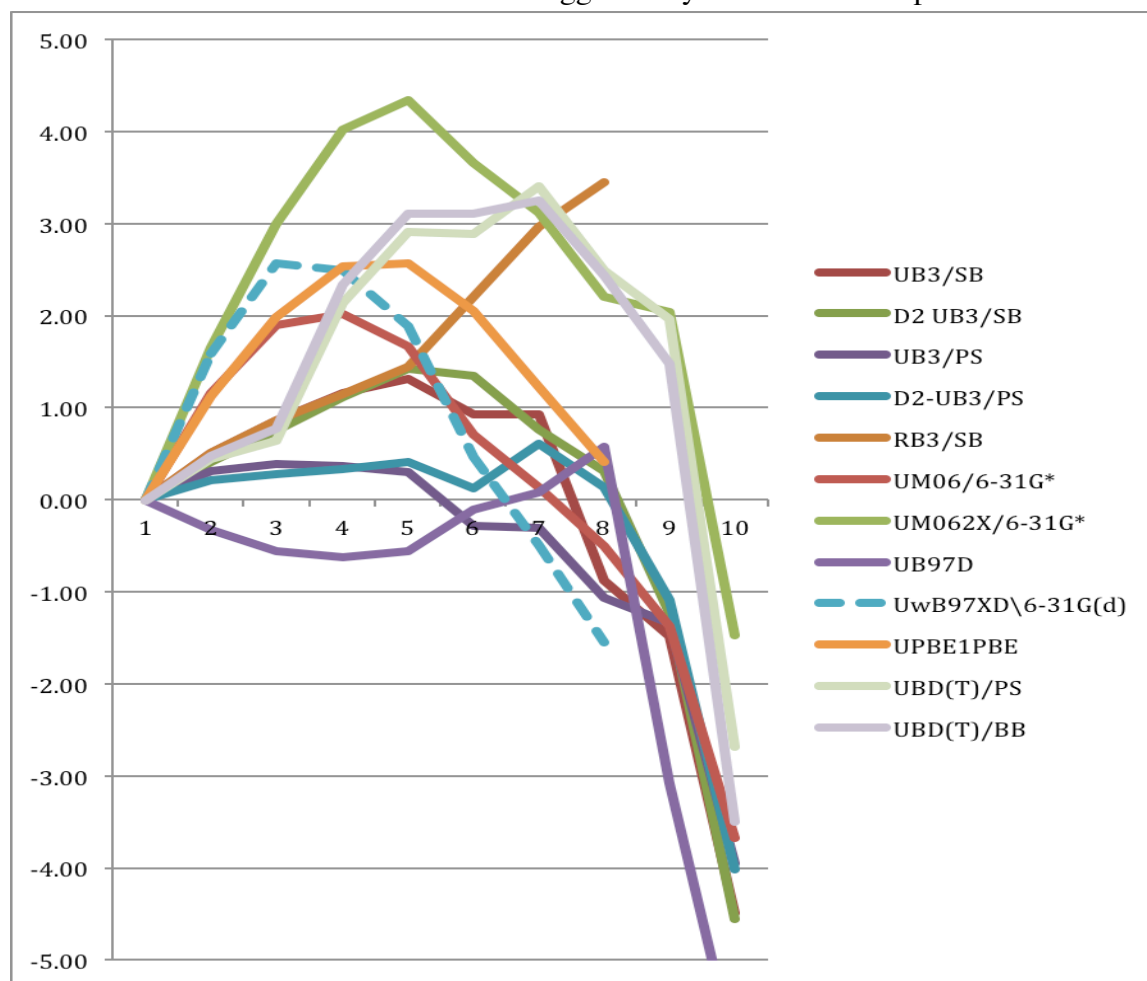

### Wave Function Stability and Spin Contamination.

All trajectories were calculated using unrestricted calculations and employing the “guess=mix” option in Gaussian09. The use of guess=mix is interestingly not completely reliable, and there is a sporadic complication with wave function instability that requires some discussion. In trajectories that have completed bond cleavage, that is, after the C<sup>3</sup>-N distance is greater than 2.9 Å and with the C<sup>1</sup>-C<sup>5</sup> distance > 3.2 Å, guess=mix occasionally fails to lead to the broken-symmetry solution. This is recognizable by the presence of trajectory points with S<sup>\*\*2</sup>=0 in the midst of those with high S<sup>\*\*2</sup> values. When these “bad points” are checked with the “stable=opt” option in Gaussian09, it is found that a lower-energy broken-symmetry solution is present. It should be noted that if such bad points affected the results, the direction of their error would be to cause the fragments to recombine, but this never happens; [2,3]-rearrangement trajectories never show any bad points at all. Bond-cleavage trajectories never show any bad points until their outcome is decided. Overall, the error does not affect the results.

To gauge approximately the range of geometries subject to spin contamination, exploratory studies of grids of geometries associated with bond cleavage in **2** were carried out in M06-2X/6-31G\* and M06/6-31G\* calculations. It was found that S<sup>\*\*2</sup>=0 when C<sup>3</sup>-N < 2.3 and C<sup>1</sup>-C<sup>5</sup> < 3.4, and when C<sup>3</sup>-N < 2.4 and C<sup>1</sup>-C<sup>5</sup> < 3.0, and when C<sup>3</sup>-N < 2.5 and C<sup>1</sup>-C<sup>5</sup> < 3.9, and when C<sup>3</sup>-N < 2.6 and C<sup>1</sup>-C<sup>5</sup> < 2.8, and when C<sup>3</sup>-N < 2.7 and C<sup>1</sup>-C<sup>5</sup> < 2.7. Outside of this range there is significant spin contamination.

All of the 2,3-rearrangement transition structures were within the range in which no spin contamination occurs. All of the B3LYP, M06-2X, and M06 2,3-rearrangement transition structures were checked with the “stable=opt” option in Gaussian09, and many of the 2,3-rearrangement transition structure were checked with the guess=mix option. In each case the 2,3-rearrangement transition structures had a stable S<sup>\*\*2</sup>=0 wavefunction. The cleavage transition states **10**<sup>‡</sup> exhibited spin contamination with S<sup>\*\*2</sup> values before annihilation of 0.37 to 0.54. As shown by the comparison of model DFT versus UBD(T) energetics described above, the error in these structures likely underestimates their energy.

We note that the surfaces for cleavage via the [2,3]-rearrangement transition state **9**<sup>‡</sup> and direct cleavage via **10**<sup>‡</sup> are both subject to the same spin contamination error, and it seems fair to expect some cancellation of error in the comparison of bond cleavage via **9**<sup>‡</sup> with that via **10**<sup>‡</sup>.

### Variational TST Rates for C-N Bond Cleavage versus [2,3]-Rearrangement

As described in the main text, variational TST calculations were carried out for the [2,3]-rearrangement via **9**<sup>‡</sup> and C<sup>3</sup>-N bond cleavage via **10**<sup>‡</sup> in order to make a prediction of the relative rates of the two processes if they were to occur by these separate transition states. These calculations were carried out on UB3LYP-D2, UM06, and UM06-2X energy surfaces, each employing a 6-31+G\*\* basis set and each including a PCM solvent model for acetonitrile. A complication in these calculations is that the GAUSSRATE calculations for rearrangement and cleavage used differing starting materials. To compare rate constants fairly, it was necessary to allow for the difference in starting materials based on the difference in free energies between the starting structures at the temperature of interest, 90 °C.

Table S7 summarizes these calculations and their results. Two things should be noted. First, due to the bias suggested by calculations described in a previous section, the rearrangement

/ cleavage ratio would be expected to be 1-4 orders of magnitude greater than those calculated here. Second, on these energy surfaces without any adjustment, the preponderance of cleavage would occur by way of the [2,3]-rearrangement transition state.

**Table S7.** Relative rate constants for C-N bond cleavage versus [2,3]-rearrangement

| (U)M06/6-31+G**               |                              |
|-------------------------------|------------------------------|
| 90 °C, CVT/SCT                |                              |
| rate constants (s-1)          | starting material energetics |
| [2,3]-rearrangement           | free energy 363              |
| 3.69E+05                      | -636.301632                  |
| cleavage                      |                              |
| 5.02E+03                      | -636.302376                  |
| raw ratio of rate constants   | difference (kcal/mol)        |
| 73.5                          | 0.467                        |
| <u>corrected ratio at 363</u> |                              |
| <b>38.5</b>                   | (rearrangement / cleavage)   |
| (U)B3LYP-D2/6-31+G**          |                              |
| 90 °C, CVT/SCT                |                              |
| rate constants (s-1)          | free energy 363              |
| [2,3]-rearrangement           | free energy 363              |
| 8.18E+06                      | -636.803383                  |
| cleavage                      |                              |
| 5.78E+05                      | -636.802746                  |
| raw ratio of rate constants   | difference (kcal/mol)        |
| 14.2                          | -0.400                       |
| <u>corrected ratio at 363</u> |                              |
| <b>24.6</b>                   | (rearrangement / cleavage)   |
| (U)M062X/6-31+G**             |                              |
| 90 °C, CVT/SCT                |                              |
| rate constants (s-1)          | free energy 363              |
| [2,3]-rearrangement           | free energy 363              |
| 2.56E+01                      | -636.443701                  |
| cleavage                      |                              |
| 1.49E+00                      | -636.442537                  |
| raw ratio of rate constants   | difference (kcal/mol)        |
| 17.2                          | -0.731                       |
| <u>corrected ratio at 363</u> |                              |
| <b>47.3</b>                   | (rearrangement / cleavage)   |

### Initialization of Trajectories and Additional Details on Trajectories

Most of the trajectories employed in the manuscript are quasiclassical, i. e. including

zero-point energy plus a Boltzmann distribution of quantized vibrational energies for each mode. As denoted in the main text in Table 1, some sets of trajectories were carried out in fully classical mode, i. e. including only a classical Boltzmann distribution of energy. For the trajectories, the desired energy in each of the normal modes was mapped from a random number generator to a Boltzmann distribution set at 25 °C. The phase of each of the normal modes was mapped from a Gaussian distribution of random numbers. This distribution is not correct for a classical oscillator but would be approximately correct for a quantum oscillator in its ground state (only ignoring mode displacements outside of the classical limit), and has the advantage that a larger portion of the trajectories start with an energy approximating the initially desired energy. The sign on the velocity of the normal modes was randomized. After an energy/force calculation on the initial geometry, the total initial energy was calculated and the trajectory was thrown out if the energy did not agree satisfactorily (within 1 kcal/mol) with the desired energy. (This is a variation of the conventional practice of scaling energies.<sup>23</sup>) The mode corresponding to the transition vector was treated classically.

The trajectories were initiated from the area of the potential energy saddle points (these geometries are given in a later section) and not the somewhat earlier CVT transition structure **9**<sup>‡</sup>. The trajectories were integrated both forward and backward in time to obtain complete trajectories connecting the starting **5** to either **6** or **8**. A relatively large proportion of the trajectories, 10-30%, were not productive, connecting either **6** with **8** or **8** with **8** or **6** with **6**. These are formally “recrossing” trajectories but in the current case they were not considered to be significant because the use of the potential energy saddle points instead of the CVT transition structures as the starting areas for the trajectories. In other words, since the trajectories did not start at the best choice of transition state, it is not surprising that some portion connect products with products and do not actually cross the variational transition state. The non-productive trajectories were ignored.

A 500 fs time limit was set for the trajectories to avoid the effect of nonphysical intramolecular redistribution of the zero-point energy. Only a very small proportion of trajectories, approximately 1%, did not complete within this time limit. The median times for formation of the 2,3 product **6**, the geminate pair **8**, and reformation of starting material **5** starting from the initial point in the area of the saddle point were 114 fs, 150 fs, and 60 fs, respectively.

To carry out the fully classical trajectories in the presence of acetonitrile solvent molecules, a combination of B3LYP-D2/6-31G\*/PCM variational transition state structure (the 6-31G\* analog of **9**<sup>‡</sup>) and 24 acetonitrile molecules placed arbitrarily (but roughly surrounding the transition structure) was subjected to two cycles of simulated annealing on a PM3 surface, starting the velocities as would be appropriate for 2363 K (in random directions) then cooling slowly (removing 0.1% of the energy per fs) to 363.15 K. In these cycles, the positions of the C<sup>1</sup>, C<sup>3</sup>, C<sup>5</sup>, and N atoms were fixed but all other atoms were freely variable. The atoms were nudged into a cubic box with an edge dimension of 13.42 Å by an algorithm that reverses the momentum of atoms moving away from the boundary of the box. A final annealing cycle was then carried out on an ONIOM surface (using UB3LYP-D2/6-31G\* for the atoms of **9**<sup>‡</sup> and PM3 for the CH<sub>3</sub>CN molecules) using an initial temperature of 1363 K and (removing 0.2% of the energy per fs) to 363.15 K. After reaching 363 K, the temperature was maintained at 363 with an algorithm that adjusts the energy toward the target temperature by 0.5% per fs, and the simulation was continued in this way for 15 ps. At intervals of 125 fs, the simulation was used

as a starter for production ONIOM trajectories by giving the C<sup>1</sup>, C<sup>3</sup>, C<sup>5</sup>, and N atoms a Boltzmann-random direction and velocity while all other atoms continued their current velocity, and the trajectories were integrated both forward and backward in time until **5**, **6**, or **8** were formed.

## Programs for Calculations and NMR Integrations, and Sample Input Files

### Program Suite PROGDYN

A full listing of the subprograms of PROGDYN is given below. To allow the reader to understand or make use of PROGDYN, we describe here first the overall structure of the program.

The master control program for dynamics, in the form of a Unix Shell Script, is called *progdynstarterHP*. For a user to start to use *progdynstarterHP*, some early lines in it that assign the scratch space and the location of the program files and input files would have to be modified for the local environment. These lines are between lines 29 and 40 and should be apparent. The location of the scratch space is usually passed to *progdynstarterHP* as a parameter.

*progdynstarterHP* takes as necessary input files:

- freqinHP* - This is the standard output from a Gaussian 98, 03, or 09 frequency calculation using freq=hpmodes. For isotopically labeled compounds, use freq=(hpmodes.readisotopes).
- progdyn.conf* - This is a file giving a variety of configuration options, called on by many of the subprograms. *progdyn.conf* is listed below and contains explanations of the program options.

*progdynstarterHP* takes optional input the files listed below. These are not needed for basic runs.

- isomernumber* - A number in file *isomernumber* provides a start for numbering runs. The default is 1.
- detour* - A signal file that, by existing, signals the program to do a side calculations
- nogo* - A signal file that, by existing, signals the program to stop between points
- bypassprogen* - A signal file that, by existing, signals the program to use a supplied input file *geoPlusVel* instead of generating one for itself.
- methodfile* - A file that contains lines to be added to the end of each *g09.com* input file, such as lines that call for an NMR calculation
- ZMAT* - An input file for the CFOUR (<http://www.cfour.de>) suite of programs. When *ZMAT* is supplied, *progdynstarterHP* will automatically run call CFOUR (which must be set up independently by the user) by making use of the script *progcfour*.
- cannontraj* - A file containing a vector for each atom, used to fire an initial geometry in a particular direction.

*progdynstarterHP* calls the following programs:

- progenHP* - An awk program that starts a trajectory, giving each mode its zero point energy (if a quasiclassical calculation) plus random additional excitations depending on the temperature.
- prog1stpoint* - Awk program that creates the first Gaussian input file for each run
- prog2ndpoint* - Awk program that creates the second Gaussian input file for each run. *prog2ndpoint* also checks the energy of the first point to see if it fits with the desired energy, and aborts the run if it does not by creating appropriate output in file *Echeck*
- progdynb* - Creates subsequent Gaussian input files until run is completed, used the awk
- proganal* - A program to analyze the latest point and see if a run is done. This program must be redone for each new system. Elaborate changes are often programmed into *proganal*, such as the automatic changing of configuration variables. *proganal* creates the output to *dynfollowfile* and *NMRlist* or *NMRlistdis*
- randgen* - A program that generates random numbers between 0 and 1. These are generated all at once and stored in a file for use by *progenHP*.
- progcfour* - A control script to run CFOUR calculations (not needed for most kinds of runs).

*progdynstarterHP* has the following output files:

- isomernumber* - A running tab of the trajectory number
- runpointnumber* - a running tab of the point in the trajectory
- Echeck* - output form where *prog2ndpoint* checks the energy of the trajectory to see if it fits with the desired energy
- geoRecord* - A record of all of the *geoPlusVel* files.

*geoPlusVel* – Created by proggen, this gives the starting positions, velocities, isotopic masses, excitations of the normal modes, and initial displacements of the normal modes for current run.

*g09.com* – Created by prog1stpoint, prog2ndpoint, and progdynb, this is the latest input file for Gaussian09 for current run and latest point.

*olddynrun* and *olderdynrun* – files containing the last two outputs from Gaussian, for creation of the next point

*traj*, *traj1*, *traj2*, *traj3*, etc. – files containing the geometries and energies for each trajectory, numbered by the isomernumber, in a format suitable for reading by Molden.

*dyn* – A record of the Gaussian outputs.

*dynfollowfile* – A short record of the runs and their results. The data desired for *dynfollowfile* must be programmed into the script *proganal* as needed for each system studied.

*NMRlist* or *NMRlistdis* – output of NMR predictions at each point in a trajectory

*skipstart* – A signal file that, by existing, tells progdynstarterHP that we are in the middle of a run. For trajectories that are propagated forward and backward in time, skipstart keeps track of whether one is in the forward or reverse part.

*diagnostics* – optional output that follows which subprograms are running and configuration variables, decided by variable in progdyn.conf

*vellist* – optional output that lists the velocities of each atom, decided by variable in progdyn.conf, or lists the total kinetic energy in the system and the classical temperature.

A number of files starting with 'temp' are created then later erased.

## Program progdynstarterHP

```
#!/bin/bash
#progdynstarterHP, made to use high-precision modes from Gaussian output with freq=hpmodes
#updated to create a random number file temp811 that is used by proggenHP
#version September 16, 2005, made for workstations
#version August 2007 to allow periodic copying of g09.log to dyn putting it under control of progdynb
#version Feb 2008 moves variables like the scratch directory and location of randgen to the beginning
#version March 2008 added proganal reporting to points 1 and 2
#version Jan 2009 fixed bug generator of having proganal run twice in checking for complete runs
#version May 2009 Echeck catches bad energies after only one point, other lines written simpler, triple while loop, revised
comments
#version Aug 2010 isomernumber adds words to ease parsing, increased elements up to bromine, runpointnumber checked for
more appropriate restarts
#
#LIMITATIONS - standard version only handles elements up to bromine, must change program to do higher atomic numbers
# only handles up to 4000th excited state for modes - this could start to affect the initialization of classical modes or transition
vectors at
# extremely high temperatures
# The routine that checks whether the actual energy approximately equals the desired energy checks for lines containing "SCF
Done" or "EUMP2 =" or " Energy="
# This should handle ordinary calculations HF, DFT, ONIOM, and MP2 calculatons but the routine in prog2ndpoint would have
to be changed for other calcs.
#
#                               OUTLINE
# A. initalize to perform Gaussian jobs and know where we are
# start loop
# B. if no file named "skipstart" then generate a new isomer. Instructions: Get rid of skipstart to start new isomer.
# the B loop generates geoPlusVel, adds it to geoRecord, generates and runs first and second points, and sets up for continuous
loop
# C. loop over propagation steps
#
# AAAAAAAAAAAAAAAAAAAAAAAAAAAAAAAAAAAAAAAAAAAAAAAAAAAAAAAAAAAAAA
#origdir, randdir, scratchdir, g09root, logfile all may need varied from system to system and assigned here or by program calling
this one
export LC_ALL=C
echo $1
scratchdir=$1
export g09root=/apps/lms/g09_A02_XEON
. $g09root/g09/bsd/g09.profile
origdir=`pwd`
cd $origdir
logfile=docslog
randdir=~/.bin
cp /data/d-singleton/binall700/* /tmp/$PBS_JOBID
cp /data/d-singleton/binall700/GENBAS $scratchdir
cp /data/d-singleton/binall700/progcfour $scratchdir
programdir=/tmp/$PBS_JOBID
```









```

    awk '/Nuclear Magnetic Resonance/./HF-SCF/ {if ($2=="C") print $1,$2,"Isotropic =", $3; if ($2=="H") print
$1,$2,"Isotropic =", $3}' x.log >> NMRlistcc
fi

# here is a cool link that lets you interrupt the dynamics with a short job, then
# it automatically goes back to the dynamics just make the file 'detour' and it
# will delete detour, run run.com, then go back to dynamics
if (test -f detour) then
    rm detour
    date >> $logfile
    cat run.com >> $logfile
    cp run.log temp.log
    cd $scratchdir
    $g09root/g09/g09 $origdir/run.com > $origdir/run.log
    cd $origdir
fi

#stop it all nicely by creating a nogo file
if (test -f nogo) then
    break
fi

#figure out if this isomer is done - change in april 2013 is to move proganal call up from here
rm -f $scratchdir/tempdone
tail -2 dynfollowfile | awk '/XXXX/ {print}' > $scratchdir/tempdone
if (test -s $scratchdir/tempdone) then
    if [ `awk '/reversetraj/ {if ($1=="reversetraj") print $2}' progdyn.conf` = "true" ]; then
        if [ `cat skipstart` = "reverse" ]; then
            rm -f skipstart
            rm -f geoPlusVel
            rm -f olddynrun
            rm -f olderdynrun
            a=`awk '{print $1}' isomernumber`
            mv traj traj$a
            mv dyn dyn$a
        fi
        if [ `cat skipstart` = "forward" ]; then
            echo reverserestart > skipstart
        fi
    else
        rm -f skipstart
        rm -f geoPlusVel
        rm -f olddynrun
        rm -f olderdynrun
        a=`awk '{print $1}' isomernumber`
        mv traj traj$a
        mv dyn dyn$a
    fi
    break
fi
done
#
END_of_C_Loop____END_of_C_Loop____END_of_C_Loop____END_of_C_Loop____END_of_C_Loop____END_of_C_L
oop____

# We've got to break a second time to get out of this loop
# if we really want to quit. Otherwise, it will start over
# at the top
if (test -f nogo) then
    break
fi
if (test -s $scratchdir/goingwell) then
    echo "starting a new point or a new direction"
else
    break
fi
done

if (test -f nogo) then
    break
fi
if (test -s $scratchdir/goingwell) then

```

```

    echo "starting a new point or a new direction2"
  else
    break
  fi
done
exit 0

```

## Program proggenHP

```

BEGIN {
# Aut 2010 changes classicalSpacing to 2 and upped possible excited states to 4000
# Jan 2009 - a number of little changes to improve reporting, precision, etc, specification of displacement on particular modes
# Jan 2009 cannonball trajectories. adds desired energy to initial velocities based on file cannontraj, so one can shoot toward a ts
# updated Nov 2008 to incorporate running DRPs
# updated Nov 2008 to allow for start without an initial freq calc using classical = 2
# updated Aug 2008 added to atom list to handle a large number of atoms without changes needed
# updated June 2008 to incorporate new method for choosing displacements with initialdis 2
# updated Jan 17 2008 - bug fix for > 99 atoms, 300 excitations of low modes possible
# version August 2007 - incorporates classical trajectory calculation option
#also allows listing of number of imaginary frequencies
# version Sept 16, 2005 - incorporates searchdir but not yet rotation
# now reads random numbers from temp811, starting at a random place
# The input files are generated before this and are tempfreqs, tempredmass,
# tempfr, tempmodes, and tempstangeos.
# It will count the number of atoms.

# default parameters, including quassiclassical, no displacements, transition state, not a DRP
# do not change these - rather, change progdyn.conf to set the parameters
initialDis=0; timestep=1E-15; scaling=1.0; temp=298.15
classical=0; numimag=1; DRP=0; cannonball=0
charge=0; multiplicity=1; method="HF/3-21G"; memory=20000000
diag=1; checkpoint="g09.chk"; searchdir="positive"; boxon=0
boxsize=10; maxAtomMove=0.1; title1="you"; title2="need"
title3="a"; title4="progdyn.conf"; processors=1; highlevel=999
conver1=4.184E26 #dividing by this converts amu ang^2 /s^2 to kcal/mol
geometry="nonlinear";rotationmode=0

#initialization and constants
for (i=1;i<=10000;i++) {disMode[i]=-1}
i=1;j=1;k=1
c=29979245800; h=6.626075E-34; avNum=6.0221415E23
RgasK=0.00198588; RgasJ=8.31447
numAtoms=0; atomnumber=0; classicalSpacing=2
zpeGauss=0; zpeGaussK=0; zpePlusE=0; potentialE=0

# read progdyn.conf for configuration info
blankLineTester=10
while (blankLineTester>1) {
  getline < "progdyn.conf"
  if ($1=="method") method=$2
  if ($1=="charge") charge=$2
  if ($1=="multiplicity") multiplicity=$2
  if ($1=="memory") memory=$2
  if ($1=="processors") processors=$2
  if ($1=="checkpoint") checkpoint=$2
  if ($1=="diagnostics") diag=$2
  if ($1=="initialdis") initialDis=$2
  if ($1=="timestep") timestep=$2
  if ($1=="scaling") scaling=$2
  if ($1=="temperature") temp=$2
  if ($1=="searchdir") searchdir=$2
  if ($1=="classical") classical=$2
  if ($1=="numimag") numimag=$2
  if ($1=="geometry") geometry=$2
  if ($1=="highlevel") highlevel=$2
  if ($1=="boxon") boxon=$2
  if ($1=="boxsize") boxsize=$2
  if ($1=="DRP") DRP=$2; if (DRP==1) classical=2 #this lets one start a DRP from a point that is not a freq calc
  if ($1=="maxAtomMove") maxAtomMove=$2
  if ($1=="cannonball") cannonball=$2
  if ($1=="displacements") disMode[$2]=$3
}
}

```

```

if ($1=="controlphase") controlPhase[$2]=$3
if ($1=="rotationmode") rotationmode=$2
if ($1=="title") {
  title1=$2
  title2=$3
  title3=$4
  title4=$5
}
blankLineTester=length($0)
}

if (diag>=1) print "***** starting proggen *****" >> "diagnostics"
if (diag>=1) print "method.charge,multiplicity,memory" >> "diagnostics"
if (diag>=1) print method.charge,multiplicity,memory >> "diagnostics"
if (diag>=1) print "processors,checkpoint,title,initialdis,timestep,scaling,temperature" >> "diagnostics"
if (diag>=1) print processors,checkpoint,title1,title2,title3,title4,initialDis,timestep,scaling,temp >> "diagnostics"
if (diag>=1) print "classical,numimag,highlevel,boxon,boxsize,DRP,maxAtomMove,cannonball" >> "diagnostics"
if (diag>=1) print classical,numimag,highlevel,boxon,boxsize,DRP,maxAtomMove,cannonball >> "diagnostics"

# put geometries into array, also figure out number of atoms
# note that this picks out the last geometry in a file, assuming
# that if there is an optimization followed by a freq, nothing else follows
# kludgy - repeats last line twice - must be a better way
do {
  getline < "tempstangeos"
  if (oldline==$0) $0=""
  oldline=$0
  atom = $1
  if (atom>numAtoms) numAtoms=atom
  atNum[atom]=$2
  geoArr[atom,1]=$4; geoArr[atom,2]=$5; geoArr[atom,3]=$6
  geoArrOrig[atom,1]=$4; geoArrOrig[atom,2]=$5; geoArrOrig[atom,3]=$6
  velArr[atom,1]=0; velArr[atom,2]=0; velArr[atom,3]=0
}
while (length($0) > 0)

#output the number of atoms, used in many routines
print numAtoms

# put in atomic symbols and atomic weights - assigns a default mass but then reads it from tempmasses when possible
for (i=1;i<=numAtoms;i++) {
  getline < "tempmasses"
  if (atNum[i]==1) {atSym[i]="H";atWeight[i]=1.00783}
  if (atNum[i]==2) {atSym[i]="He";atWeight[i]=4.0026}
  if (atNum[i]==3) {atSym[i]="Li";atWeight[i]=6.941}
  if (atNum[i]==4) {atSym[i]="Be";atWeight[i]=9.012}
  if (atNum[i]==5) {atSym[i]="B";atWeight[i]=10.811}
  if (atNum[i]==6) {atSym[i]="C";atWeight[i]=12.}
  if (atNum[i]==7) {atSym[i]="N";atWeight[i]=14.007}
  if (atNum[i]==8) {atSym[i]="O";atWeight[i]=15.9994}
  if (atNum[i]==9) {atSym[i]="F";atWeight[i]=18.9984}
  if (atNum[i]==10) {atSym[i]="Ne";atWeight[i]=20.1797}
  if (atNum[i]==11) {atSym[i]="Na";atWeight[i]=22.989}
  if (atNum[i]==12) {atSym[i]="Mg";atWeight[i]=24.305}
  if (atNum[i]==13) {atSym[i]="Al";atWeight[i]=26.98154}
  if (atNum[i]==14) {atSym[i]="Si";atWeight[i]=28.0855}
  if (atNum[i]==15) {atSym[i]="P";atWeight[i]=30.9738}
  if (atNum[i]==16) {atSym[i]="S";atWeight[i]=32.066}
  if (atNum[i]==17) {atSym[i]="Cl";atWeight[i]=35.4527}
  if (atNum[i]==18) {atSym[i]="Ar";atWeight[i]=39.948}
  if (atNum[i]==19) {atSym[i]="K";atWeight[i]=39.0983}
  if (atNum[i]==20) {atSym[i]="Ca";atWeight[i]=40.078}
  if (atNum[i]==21) {atSym[i]="Sc";atWeight[i]=44.96}
  if (atNum[i]==22) {atSym[i]="Ti";atWeight[i]=47.867}
  if (atNum[i]==23) {atSym[i]="V";atWeight[i]=50.94}
  if (atNum[i]==24) {atSym[i]="Cr";atWeight[i]=51.9961}
  if (atNum[i]==25) {atSym[i]="Mn";atWeight[i]=54.938}
  if (atNum[i]==26) {atSym[i]="Fe";atWeight[i]=55.845}
  if (atNum[i]==27) {atSym[i]="Co";atWeight[i]=58.933}
  if (atNum[i]==28) {atSym[i]="Ni";atWeight[i]=58.693}
  if (atNum[i]==29) {atSym[i]="Cu";atWeight[i]=63.546}
  if (atNum[i]==30) {atSym[i]="Zn";atWeight[i]=65.38}
}

```

```

if (atNum[i]==31) {atSym[i]="Ga";atWeight[i]=69.723}
if (atNum[i]==32) {atSym[i]="Ge";atWeight[i]=72.64}
if (atNum[i]==33) {atSym[i]="As";atWeight[i]=74.9216}
if (atNum[i]==34) {atSym[i]="Se";atWeight[i]=78.96}
if (atNum[i]==35) {atSym[i]="Br";atWeight[i]=79.904}
if (atNum[i]==46) {atSym[i]="Pd";atWeight[i]=106.42}
if (atNum[i]==53) {atSym[i]="I";atWeight[i]=126.90447}
# gets actual weight from freqinHP when possible so a prior calc with readisotopes gets you isotopic substitution
if ((i<100) && ($9>0)) atWeight[i]=$9
# if ((i>99) && ($8>0)) atWeight[i]=$8

if ((diag>1) && (i==1)) print "atNum[i],atSym[i],atWeight[i],geoArr[i,1],geoArr[i,2],geoArr[i,3]" >> "diagnostics"
if (diag>1) print atNum[i],atSym[i],atWeight[i],geoArr[i,1],geoArr[i,2],geoArr[i,3] >> "diagnostics"
}

# read in frequencies, scale them, read in Reduced masses, read in force
#constants, replace negative frequencies by 2 wavenumbers
numFreq=3*numAtoms-6
if (geometry=="linear") numFreq=3*numAtoms-5
for (i=1;i<=numFreq;i++) {
  $0=""
  getline < "tempfreqs"
  freq[i]=$0*scaling
  if (freq[i]<0) freq[i]=2
}
for (i=1;i<=numFreq;i++) {
  $0=""
  getline < "tempredmass"
  redMass[i]=$0
  if (redMass[i]=="") redMass[i]=1.
}
for (i=1;i<=numFreq;i++) {
  $0=""
  getline < "tempfrfc"
  frc[i]=$0
  if (frc[i]=="") frc[i]=0.0001
  if (frc[i]==0) frc[i]=0.0001
  if ((diag>1) && (i==1)) print "freq[i],redMass[i],frc[i]" >> "diagnostics"
  if (diag>1) print freq[i],redMass[i],frc[i] >> "diagnostics"
}

# read in the modes - note that trajectories always need a freq calc with freq=hpmodes unless classical=2
if (classical!=2) {
  for (i=1;i<=numFreq;i+=5) {
    for (j=1;j<=(3*numAtoms);j++) {
      getline < "tempmodes"
      mode[i,$2,$1]=$4; mode[i+1,$2,$1]=$5; mode[i+2,$2,$1]=$6; mode[i+3,$2,$1]=$7; mode[i+4,$2,$1]=$8
    }
  }
}
if (diag>2) {for (i=1;i<=numFreq;i++) {print mode[i,1,1],mode[i,1,2],mode[i,1,3] >> "modesread"}}}

# if doing a cannonball trajectory, read in the vector
if (cannonball>0) {
  for (i=1;i<=numAtoms;i++) {
    getline < "cannontraj"
    cannonArr[i,1]=$1; cannonArr[i,2]=$2; cannonArr[i,3]=$3
  }
}

# collect a series of random numbers from file temp811, generated from an outside random number generator called by
prodynstarterHP
# read from temp811, starting at a random place
srand(PROCINFO["pid"]); tester=rand()*1000
for (i=1;i<=tester;i++) getline < "temp811"
for (i=1;i<=numFreq;i++) {
  getline < "temp811"; randArr[i]=$1
  getline < "temp811"; randArrB[i]=$1
  getline < "temp811"; randArrC[i]=$1
}
for (i=1;i<=6;i++) {
  getline < "temp811"; randArrR[i]=$1
}

```

```

}

# for a QM distribution for a harmonic oscillator in its ground state, we want to generate a set of random numbers
#between -1 and 1 weighted such that numbers toward the center are properly more common
i=1
while (i<=numFreq) {
  if ((initialDis==2) || (disMode[i]==2)) {
    getline < "temp811"
    tempNum=2*($1-.5)
    prob=exp(-(tempNum^2))
    getline < "temp811"
    if ($1<prob) {
      randArrD[i]=tempNum
      i++
    }
  }
  if ((initialDis!=2) && (disMode[i]!=2)) i++
}

# to start without normal modes or frequencies we need to just pick a random direction for the motion of each atom, requiring 3N
random numbers
for (i=1;i<=numAtoms;i++) {
  for (j=1;j<=3;j++) {
    getline < "temp811"
    if ($1>.5) randArrE[i,j]=1
    if ($1<.5) randArrE[i,j]=-1
  }
}

# determine energy in each normal mode
for (i=1;i<=numFreq;i++) {
  zpeJ[i]=0.5*h*c*freq[i] #units J per molecule
  #if classical, treat as modes spaced by classicalSpacing wavenumbers
  if (classical==1) zpeJ[i]=0.5*h*c*classicalSpacing # the zpe is not used when classical but the spacing is used to calculate the
  E in mode
  zpeK[i]=zpeJ[i]*avNum/4184 #units kcal/mol
  if (temp<10) vibN[i]=0 # avoids working with very small temperatures - if the temp is too low, it just acts like 0 K
  if (temp>=10) {
    zpeRat[i]=exp((-2*zpeK[i])/(RgasK*temp))
    if (zpeRat[i]==1) zpeRat[i]=.9999999999
    Q[i]=1/(1-zpeRat[i])
    newRand=randArr[i]
    vibN[i]=0
    tester=1/Q[i]
  }
  # get up to 4000 excitations of low modes
  for (j=1;j<=(4000*zpeRat[i]+2);j++) {
    if (newRand>tester) vibN[i]++
    tester=tester+((zpeRat[i]^j)/Q[i])
  }
}

# figure out mode energies and maximum classical shift and then actual shift
# also calculated total energy desired for molecule
desiredModeEnK=0
for (i=1;i<=numFreq;i++) {
  modeEn[i]=(zpeJ[i]*1E18)*(2*vibN[i]+1) # units here are mDyne Angstroms for compatability with Gaussian force constants
  if (classical==1) modeEn[i]=(zpeJ[i]*1E18)*2*vibN[i] #no zpe when classical
  modeEnK[i]=zpeK[i]*(2*vibN[i]+1)
  if (classical==1) modeEnK[i]=zpeK[i]*2*vibN[i] #no zpe when classical
  desiredModeEnK=desiredModeEnK + modeEnK[i]
}
# no 1/2 hv for imaginary frequencies
# treating modes with frequencies <10 as translations, ignoring their zero point energies
if (freq[i]<10) modeEn[i]=(zpeJ[i]*1E18)*(2*vibN[i])
maxShift[i]=(2*modeEn[i]/frc[i])^0.5
# new 2012 initialDis 3 means random phase of normal mode
if (initialDis==3) shift[i]=maxShift[i]*sin(randArrC[i]*3.141592*2)
if (initialDis==2) shift[i]=maxShift[i]*randArrD[i]
if (initialDis==1) shift[i]=maxShift[i]*(2*(randArrC[i]-0.5))
if (initialDis==0) shift[i]=0
# lines below allow for setting of displacement mode for individual modes

```



```

# It used to be necessary to use disMode 10 to turn off displacements for a mode, but hopefully that bug is killed and you can use
disMode 0
  if (disMode[i]==3) shift[i]=maxShift[i]*sin(randArrC[i]*3.141592*2)
  if (disMode[i]==2) shift[i]=maxShift[i]*randArrD[i]
  if (disMode[i]==1) shift[i]=maxShift[i]*(2*(randArrC[i]-0.5))
  if (disMode[i]==10) shift[i]=0 #kept for backward compatability
  if (disMode[i]==0) shift[i]=0
# no displacements along imaginary frequencies and very low ones - it is better to treat these
# as translations - employing a shift can give you initial weird geometries
  if (freq[i]<10) shift[i]=0
  if (numimag==1) shift[1]=0
  if (numimag==2) shift[2]=0
}
for (i=1;i<=numFreq;i++) {
  if ((diag>1) && (i==1)) print "zpeJ[i],zpeK[i],zpeRat[i],Q[i],vibN[i],modeEn[i],maxShift[i],shift[i]" >> "diagnostics"
  if (diag>1) print zpeJ[i],zpeK[i],zpeRat[i],Q[i],vibN[i],modeEn[i],maxShift[i],shift[i] >> "diagnostics"
}

# multiply each of the modes by its shift and add them up
# Do not do this if classical=2
if (classical!=2) {
  for (i=1;i<=numFreq;i++) {
    for (j=1;j<=numAtoms;j++) {
      for (k=1;k<=3;k++) {
        shiftMode[i,j,k]=mode[i,j,k]*shift[i]
        geoArr[j,k]=geoArr[j,k]+shiftMode[i,j,k]
      }
    }
  }
}

#now start toward velocities
for (i=1;i<=numFreq;i++) {
  kinEn[i]=100000*(modeEn[i]-0.5*frc[i]*shift[i]^2) # the 100000 converts to g angstrom^2 s^2
  vel[i]=(2*kinEn[i]/(redMass[i]/avNum))^0.5 # in angstrom / s
#use searchdir in progdyn.conf to control the direction for trajectories started from a saddle point
  if (numimag>1) numimag=1 #only the first freq can be sent in the searchdir direction, the rest go in a random direction
  if (i>numimag) {
    if (randArrB[i]<0.5) vel[i]=-vel[i]
  }
  if (i==numimag) {
    if (searchdir=="negative") vel[i]=-vel[i]
  }
  if ((diag>1) && (i==1)) print "vel[i]" >> "diagnostics"
  if (diag>1) print vel[i] >> "diagnostics"
}

# if controlphase is being used, set the velocity on particular modes as positive or negative as requested
for (i=1;i<=numFreq;i++) {
  if ((controlPhase[i]=="positive") && (vel[i]<0)) vel[i]=-vel[i]
  if ((controlPhase[i]=="negative") && (vel[i]>0)) vel[i]=-vel[i]
}

# multiply each of the modes by its velocity and add them up
# Do not do this if classical=2
if (classical!=2) {
  for (i=1;i<=numFreq;i++) {
    for (j=1;j<=numAtoms;j++) {
      for (k=1;k<=3;k++) {
        velMode[i,j,k]=mode[i,j,k]*vel[i]*timestep
        velArr[j,k]=velArr[j,k]+velMode[i,j,k]
      }
    }
  }
}

# to start without normal modes or frequencies we figure out the energy per atom based on 1/2RT in degree of freedom
if (classical==2) {
# to avoid a bug with a box on, starts without modes should use the input geometry, not the standard
do {
  getline < "tempinputgeos"
  if (oldline==$0) $0=""
}
}

```

```

oldline=$0
atom = $1
geoArr[atom,1]=$4; geoArr[atom,2]=$5; geoArr[atom,3]=$6
geoArrOrig[atom,1]=$4; geoArrOrig[atom,2]=$5; geoArrOrig[atom,3]=$6
}
while (length($0) > 0)
degFreedomEnK=temp*RgasK
degFreedomEnJ=degFreedomEnK/(avNum/4184)
cartEn=degFreedomEnJ*1E18
kinEnCart=100000*cartEn
#print degFreedomEnK, degFreedomEnJ, cartEn, kinEnCart
for (i=1;i<=numAtoms;i++) {
  for (j=1;j<=3;j++) {
    velArr[i,j]=randArrE[i,j]*timestep*(2*kinEnCart/(atWeight[i]/avNum))^0.5
    if (DRP==1) velArr[i,j]=0
  }
}
}

# calculate the KE in the modes at this point
KEinitmodes=0
for (j=1;j<=numAtoms;j++) {
  KEinitmodes=KEinitmodes + 0.5*atWeight[j]*(velArr[j,1]^2 + velArr[j,2]^2 + velArr[j,3]^2)/((timestep^2)*conver1)
}

# add molecular rotation if requested
if (rotationmode>0) {
#establish three rotation vectors
for (j=1;j<=numAtoms;j++) {
  rotateX[j,1]=0
  rotateX[j,2]=-geoArrOrig[j,3]
  rotateX[j,3]=geoArrOrig[j,2]
  rotateY[j,1]=-geoArrOrig[j,3]
  rotateY[j,2]=0
  rotateY[j,3]=geoArrOrig[j,1]
  rotateZ[j,1]=-geoArrOrig[j,2]
  rotateZ[j,2]=geoArrOrig[j,1]
  rotateZ[j,3]=0
}
#figure out how much energy is in the raw vectors
eRotX=0;eRotY=0;eRotZ=0
for (j=1;j<=numAtoms;j++) {
  for (k=1;k<=3;k++) {
    eRotX=eRotX + 0.5*atWeight[j]*(rotateX[j,k]^2)/((timestep^2)*conver1)
    eRotY=eRotY + 0.5*atWeight[j]*(rotateY[j,k]^2)/((timestep^2)*conver1)
    eRotZ=eRotZ + 0.5*atWeight[j]*(rotateZ[j,k]^2)/((timestep^2)*conver1)
  }
}
# print "rotation energies if raw vector used",eRotX,eRotY,eRotZ
#now decie how much energy we want in each rotation
keRx=-0.5*0.001987*temp*log(1-randArrR[1])
keRy=-0.5*0.001987*temp*log(1-randArrR[2])
keRz=-0.5*0.001987*temp*log(1-randArrR[3])
if (eRotX<1) keRx=0;if (eRotY<1) keRy=0;if (eRotZ<1) keRz=0
rotEdesired=keRx+keRy+keRz
signX=1;signY=1;signZ=1
if (randArrR[4]<.5) signX=-1
if (randArrR[5]<.5) signY=-1
if (randArrR[6]<.5) signZ=-1

# print "desired energies",keRx,keRy,keRz,"and random numbers",randArrR[1],randArrR[2],randArrR[3]
#protect against zero rotations
if (eRotX<1) eRotX=1;if (eRotY<1) eRotY=1;if (eRotZ<1) eRotZ=1
#now scale the rotational vectors
scaleX=(keRx/eRotX)^.5
scaleY=(keRy/eRotY)^.5
scaleZ=(keRz/eRotZ)^.5
# print "scaling factors" scaleX,scaleY,scaleZ
for (j=1;j<=numAtoms;j++) {
  for (k=1;k<=3;k++) {
    rotateX[j,k]=rotateX[j,k]*scaleX*signX
    rotateY[j,k]=rotateY[j,k]*scaleY*signY
  }
}

```

```

        rotateZ[j,k]=rotateZ[j,k]*scaleZ*signZ
    }
}
for (j=1;j<=numAtoms;j++) {
#   print rotateX[j,1]," ",rotateX[j,2]," ",rotateX[j,3]
}
# print ""
for (j=1;j<=numAtoms;j++) {
#   print rotateY[j,1]," ",rotateY[j,2]," ",rotateY[j,3]
}
# print ""
for (j=1;j<=numAtoms;j++) {
#   print rotateZ[j,1]," ",rotateZ[j,2]," ",rotateZ[j,3]
}
# now add the rotational vectors to velArr
for (j=1;j<=numAtoms;j++) {
    for (k=1;k<=3;k++) {
        velArr[j,k]=velArr[j,k]+rotateX[j,k]+rotateY[j,k]+rotateZ[j,k]
    }
}
}

# if doing a cannonball, adjust multiplier until extra energy is correct
if (cannonball>0) {
    multiplier=1; tester=0; tolerance=.1
    while (tester==0) {
        KEinittotal=0
        for (j=1;j<=numAtoms;j++) {
            cannonvelArr[j,1]=velArr[j,1]+multiplier*cannonArr[j,1]; cannonvelArr[j,2]=velArr[j,2]+multiplier*cannonArr[j,2];
            cannonvelArr[j,3]=velArr[j,3]+multiplier*cannonArr[j,3]
            KEinittotal=KEinittotal + 0.5*atWeight[j]*(cannonvelArr[j,1]^2 + cannonvelArr[j,2]^2 +
            cannonvelArr[j,3]^2)/((timestep^2)*conver1)
        }
        if (KEinittotal>(KEinitmodes+cannonball+tolerance)) multiplier=multiplier*0.98901364
        if (KEinittotal<(KEinitmodes+cannonball-tolerance)) multiplier=multiplier*1.01
        if ((KEinittotal<(KEinitmodes+cannonball+tolerance)) && (KEinittotal>(KEinitmodes+cannonball-tolerance))) tester=1
    }
    for (j=1;j<=numAtoms;j++) {
        velArr[j,1]=velArr[j,1]+multiplier*cannonArr[j,1]; velArr[j,2]=velArr[j,2]+multiplier*cannonArr[j,2];
        velArr[j,3]=velArr[j,3]+multiplier*cannonArr[j,3]
    }
}

#output the new geometry.
# ***** this section changed for special experiment for cyclopentadiene. do not use this for other cases
# atWeight[4]=140.0001
# ***** line below added for special experiment switching mass from 12 to 140, keeping momenta the same
# velArr[4,1]=velArr[4,1]/11.66667; velArr[4,2]=velArr[4,2]/11.66667; velArr[4,3]=velArr[4,3]/11.66667
for (j=1;j<=numAtoms;j++) {
    printf("%2s % .7f % .7f % .7f %9.5f\n",atSym[j],geoArr[j,1],geoArr[j,2],geoArr[j,3],atWeight[j])
}

#output the velocities and calculate the total kinetic energy overall
KEinittotal=0
for (j=1;j<=numAtoms;j++) {
    KEinittotal=KEinittotal + 0.5*atWeight[j]*(velArr[j,1]^2 + velArr[j,2]^2 + velArr[j,3]^2)/((timestep^2)*conver1)
    printf("% .8f % .8f % .8f\n",velArr[j,1],velArr[j,2],velArr[j,3])
}

#anything else I add to the file will not affect the trajectories but will keep a record and be good for analysis
for (i=1;i<=numFreq;i++) {
    if (initialDis==0) printf("% .6f % .6f %4i % 1.4e % .6f %1i\n", randArr[i], randArrB[i], vibN[i], vel[i], shift[i],
    disMode[i])
    if (initialDis==1) printf("% .6f % .6f %4i % 1.4e % .6f %1i\n", randArr[i], randArrC[i], vibN[i], vel[i], shift[i],
    disMode[i])
    if (initialDis==2) printf("% .6f % .6f %4i % 1.4e % .6f %1i\n", randArr[i], randArrD[i], vibN[i], vel[i], shift[i],
    disMode[i])
    if (initialDis==3) printf("% .6f % .6f %4i % 1.4e % .6f %1i % .6f\n", randArr[i], randArrC[i], vibN[i], vel[i], shift[i],
    disMode[i], sin(randArrC[i]*3.141592*2))
}
print "temp ",temp
print "initialDis",initialDis

```

```

print "classical",classical
print "timestep",timestep
print "numimag",numimag
OFMT = "%.3f"
print "Total mode energy desired=",desiredModeEnK
print "KE initial from modes=",KEinitmodes," KE initial total=",KEinittotal," Rotational Energy desired=",rotEdesired
if (cannonball>0) print "cannonball",cannonball," cannon Energy=",KEinittotal-KEinitmodes
if (boxon>0) print "boxsize",boxsize
if (DRP>0) print "DRP",DRP," maxAtomMove",maxAtomMove
if (DRP>0) print maxAtomMove > "maxMove"
} # End of BEGIN

/Zero-point correction/ {zpeGauss=$3}
/zero-point Energies/ {zpePlusE=$7}
END {
zpeGaussK=zpeGauss*627.509
potentialE=zpePlusE - zpeGauss
OFMT = "%.6f"
print "Gaussian zpe=" ,zpeGauss,"or" ,zpeGaussK,"kcal/mol E + zpe=" ,zpePlusE," potential E=" ,potentialE
print "" #will use blank line to mark end of geoPlusVel file
}

```

## Program prog1stpoint

```

BEGIN {
# aug 2010 changed so that it is more careful in reading in from geoPlusVel
# removed some default parameters that should always be defined
# Jan 2009 - a number of little changes to improve reporting, precision, etc
# aug 2008 added to atom list so handles H to Cl without change needed
# version Feb 2008 incorporates methodfile, boxon and boxsize, though this point unaffected by box
# version Jan 2008 - allows for ONIOM jobs, fixed atoms
# version Sept 2005 - incorporates meth3, meth4, meth5, meth6, but not yet rotation
# this program creates the first input file for g09
# the title should be changed as appropriate
# the isomer number comes from a file isomernumber

# default parameters, including quassclassical, no displacements, transition state, not a DRP
# do not change these - rather, change progdyn.conf to set the parameters
initialDis=0; timestep=1E-15; scaling=1.0; temp=298.15
classical=0; numimag=1; DRP=0; cannonball=0
memory=20000000
diag=1; checkpoint="g09.chk"; searchdir="positive"; boxon=0
boxsize=10; maxAtomMove=0.1; title1="you"; title2="need"
title3="a"; title4="progdyn.conf"; processors=1; highlevel=999; linkatoms=0
geometry="nonlinear";nonstandard=0
nmrtype=0;nmrevery=9999999

#initialization
i=1;j=1;k=1
c=29979245800; h=6.626075E-34; avNum=6.0221415E23
RgasK=0.00198588; RgasJ=8.31447
numAtoms=0; atomnumber=0
getline < "runpointnumber"
runpointnum = $1

# read progdyn.conf for configuration info
blankLineTester=10
while (blankLineTester>1) {
getline < "progdyn.conf"
if ($1=="method") method=$2
if ($1=="method2") meth2=$2
if ($1=="charge") charge=$2
if ($1=="multiplicity") multiplicity=$2
if ($1=="memory") memory=$2
if ($1=="processors") processors=$2
if ($1=="checkpoint") checkpoint=$2
if ($1=="timestep") timestep=$2
if ($1=="diagnostics") diag=$2
if ($1=="method3") meth3=$2
if ($1=="method4") meth4=$2

```

```

if ($1=="method5") meth5=$2
if ($1=="method6") meth6=$2
if ($1=="method7") meth7=$2
if ($1=="highlevel") highlevel=$2
if ($1=="linkatoms") linkatoms=$2
if ($1=="fixedatom1") fixedatom1=$2
if ($1=="fixedatom2") fixedatom2=$2
if ($1=="fixedatom3") fixedatom3=$2
if ($1=="fixedatom4") fixedatom4=$2
if ($1=="methodfile") methodfilelines=$2
if ($1=="killcheck") killcheck=$2
if ($1=="NMRmethod") nmrmethod=$2
if ($1=="NMRmethod2") nmrmethod2=$2
if ($1=="NMRmethod3") nmrmethod3=$2
if ($1=="NMRtype") nmrtype=$2
if ($1=="NMRevery") nmrevery=$2
if ($1=="nonstandard") nonstandard=$2
if ($1=="title") {
    title1=$2
    title2=$3
    title3=$4
    title4=$5
}
blankLineTester=length($0)
}

if (diag==1) print "***** starting prog1stpoint *****" >> "diagnostics"
if (diag==1) print "method.charge.multiplicity.memory" >> "diagnostics"
if (diag==1) print method.charge.multiplicity.memory >> "diagnostics"
if (diag==1) print "processors.checkpoint.title" >> "diagnostics"
if (diag==1) print processors.checkpoint.title1,title2,title3,title4 >> "diagnostics"

getline < "isomernumber"
isomernum = $1
#read in number of atoms, geometry, masses, and velocity from geoPlusVel
getline < "geoPlusVel"
numAtoms=$1
# geometry
for (i=1;i<=numAtoms;i++) {
    getline < "geoPlusVel"
    weight[i]=$5
    atSym[i]=$1
    for (j=1;j<=3;j++) {
        geoArr[i,j]=$1+j
    }
}
#velocities not needed for 1st point
for (i=1;i<=numAtoms;i++) {
    getline < "geoPlusVel"
    for (j=1;j<=3;j++) {
        velArr[i,j]=$j
    }
}

print "%nproc=" processors
print "%mem=" memory
if (killcheck!=1) print "%chk=" checkpoint
if (nonstandard==0) {
    print "# " method " force scf=(tight,nosym) "
    if (meth2=="unrestricted") print "guess=mix" #for unrestricted calculations
    if (length(meth3)>2) print meth3
    if (length(meth4)>2) print meth4
}
if (nonstandard==1) {
    print "# "
    print "nonstd"
    system("cat nonstandard")
}
print ""
# make the title four words exactly, leaving out spaces if necessary
print title1,title2,title3,title4
print "runpoint " ,runpointnum

```

```

print "runisomer ", isomernum
print ""
print charge,multiplicity
}

END {
for (i=1;i<=numAtoms;i++) {
  printf("%s %.7f %.7f %.7f",atSym[i],geoArr[i,1],geoArr[i,2],geoArr[i,3])
  if ((i>highlevel) && (i<=highlevel+linkatoms)) printf(" %s","M H")
  if (i>(highlevel+linkatoms)) printf(" %s","M")
  print ""
}
}
print ""
if (length(meth5)>2) print meth5
if (length(meth6)>2) print meth6
if (methodfilelines>=1) {
  for (i=1;i<=methodfilelines;i++) {
    getline < "methodfile"
    print $0
  }
}
if ((nmrtype>0) && ((runpointnum % nmrevery)==0)) {
  print "--link1--"
  print "%nproc=" processors
  print "%mem=" memory
  print "%chk=" checkpoint
  print "# " nmrmethod " nmr=giao geom=check"
  if (nmrmethod==method) print "guess=tcheck"
  if (length(meth7)>2) print meth7
  print ""
  print title1,title2,title3,title4
  print "runpoint ",runpointnum
  print "runisomer ",isomernum
  print ""
  print charge,multiplicity
}
print ""
if ((nmrtype>1) && ((runpointnum % nmrevery)==0)) {
  print "--link1--"
  print "%nproc=" processors
  print "%mem=" memory
  print "%chk=" checkpoint
  print "# " nmrmethod2 " nmr=giao geom=check"
  if (length(meth7)>2) print meth7
  print ""
  print title1,title2,title3,title4
  print "runpoint ",runpointnum
  print "runisomer ",isomernum
  print ""
  print charge,multiplicity
}
print ""
if ((nmrtype>2) && ((runpointnum % nmrevery)==0)) {
  print "--link1--"
  print "%nproc=" processors
  print "%mem=" memory
  print "%chk=" checkpoint
  print "# " nmrmethod3 " nmr=giao geom=check"
  if (length(meth7)>2) print meth7
  print ""
  print title1,title2,title3,title4
  print "runpoint ",runpointnum
  print "runisomer ",isomernum
  print ""
  print charge,multiplicity
}
print ""
}
}

```

## Program prog2ndpoint

```

BEGIN {
#Aug 2010 added etolerance to make it controllable from progdyn.conf, made it so that DRP does not check energy
# aug 2008 added to atom list so handles 1 to 17 without change needed
# version Feb 2008 incorporates methodfile, boxon and boxsize, though this point unaffected by box
# version Jan 2008 - allows for ONIOM jobs, fixed atoms
# version Sept 9, 2005 - incorporates meth3, meth4, meth5, meth6, but not yet rotation
# read progdyn.conf for configuration info

# default parameters, including quassiclassical, no displacements, transition state, not a DRP
# do not change these - rather, change progdyn.conf to set the parameters
initialDis=0; timestep=1E-15; scaling=1.0; temp=298.15
classical=0; numimag=1; DRP=0; cannonball=0
memory=20000000
diag=1; checkpoint="g09.chk"; searchdir="positive"; boxon=0
boxsize=10; maxAtomMove=0.1; title1="you"; title2="need"
title3="a"; title4="progdyn.conf"; processors=1; highlevel=999; linkatoms=0
etolerance=1
geometry="nonlinear";nonstandard=0
NMRtype=none;NMRevery=9999999

#initialization
i=1;j=1;k=1
c=29979245800; h=6.626075E-34; avNum=6.0221415E23
RgasK=0.00198588; RgasJ=8.31447
numAtoms=0; atomnumber=0
getline < "runpointnumber"
runpointnum = $1

blankLineTester=10
while (blankLineTester>1) {
  getline < "progdyn.conf"
  if ($1=="method") method=$2
  if ($1=="method2") meth2=$2
  if ($1=="charge") charge=$2
  if ($1=="multiplicity") multiplicity=$2
  if ($1=="memory") memory=$2
  if ($1=="processors") processors=$2
  if ($1=="checkpoint") checkpoint=$2
  if ($1=="timestep") timestep=$2
  if ($1=="diagnostics") diag=$2
  if ($1=="method3") meth3=$2
  if ($1=="method4") meth4=$2
  if ($1=="method5") meth5=$2
  if ($1=="method6") meth6=$2
  if ($1=="method7") meth7=$2
  if ($1=="highlevel") highlevel=$2
  if ($1=="linkatoms") linkatoms=$2
  if ($1=="fixedatom1") fixedatom1=$2
  if ($1=="fixedatom2") fixedatom2=$2
  if ($1=="fixedatom3") fixedatom3=$2
  if ($1=="fixedatom4") fixedatom4=$2
  if ($1=="DRP") DRP=$2
  if ($1=="methodfile") methodfilelines=$2
  if ($1=="killcheck") killcheck=$2
  if ($1=="etolerance") etolerance=$2
  if ($1=="reversetrajectory") reversetrajectory=$2
  if ($1=="NMRmethod") nmrmethod=$2
  if ($1=="NMRmethod2") nmrmethod2=$2
  if ($1=="NMRmethod3") nmrmethod3=$2
  if ($1=="NMRtype") nmrtype=$2
  if ($1=="NMRevery") nmrevery=$2
  if ($1=="nonstandard") nonstandard=$2
  if ($1=="title") {
    title1=$2
    title2=$3
    title3=$4
    title4=$5
  }
  blankLineTester=length($0)
}
}

```

```

if (diag>=1) print "***** starting prog2ndpoint *****" >> "diagnostics"
if (diag>=1) print "method,charge,multiplicity,memory" >> "diagnostics"
if (diag>=1) print method,charge,multiplicity,memory >> "diagnostics"
if (diag>=1) print "processors,checkpoint,title" >> "diagnostics"
if (diag>=1) print processors,checkpoint,title1,title2,title3,title4 >> "diagnostics"

#get the isomer number from file
getline < "isomernumber"
isomernum = $1

#get forward or reverse from skipstart if it exists
getline < "skipstart"
trajdirection = $1

print "%nproc=" processors
print "%mem=" memory
if (killcheck!=1) print "%chk=" checkpoint
if (nonstandard==0) {
  print "# " method " force scf=(tight_nosym) "
  if (meth2=="unrestricted") print "guess=mix" #for unrestricted calculations
  if (meth2=="read") print "guess=tcheck" #for reading orbitals from check, sometimes faster, sometimes not
  if (length(meth3)>2) print meth3
  if (length(meth4)>2) print meth4
}
if (nonstandard==1) {
  print "# "
  print "nonstd"
  system("cat nonstandard")
}
print ""
print title1,title2,title3,title4
print "runpoint ",runpointnum
print "runisomer ", isomernum
print ""
print charge,multiplicity

# ok, now we have to figure the second point. this should be
#  $x(t) = x + v*t + 1/2*F*t^2/m$ 
# so we need to set up arrays for position, velocity, and force

#read in number of atoms, geometry, masses, and velocity from geoPlusVel
getline < "geoPlusVel"
numAtoms=$1
# geometry
for (i=1;i<=numAtoms;i++) {
  getline < "geoPlusVel"
  weight[i]=$5
  atSym[i]=$1
  for (j=1;j<=3;j++) {
    geoArr[i,j]=$1+j
  }
}
#velocities
for (i=1;i<=numAtoms;i++) {
  getline < "geoPlusVel"
  for (j=1;j<=3;j++) {
    velArr[i,j]=$j
  }
}

#now we go ahead and add the velocities
for (i=1;i<=numAtoms;i++) {
  for (j=1;j<=3;j++) {
    arr[i,j]=velArr[i,j]+geoArr[i,j]
    if (trajdirection=="reverserestart") arr[i,j]=geoArr[i,j]-velArr[i,j]
  }
  if ((diag>1) && (i==1)) print "geometry after adding velocities" >> "diagnostics"
  if (diag>1) print arr[i,1],arr[i,2],arr[i,3] >> "diagnostics"
}

#pull out other information useful for testing whether total energy is right or bad

```



```

blankLineTester=10
while (blankLineTester>1) {
  getline < "geoPlusVel"
  if ($4=="desired=") desiredModeEnK=$5
  if ($4=="modes=") {
    KEinitmodes=$5
    KEinittotal=$9
  }
  if ($1=="potential") potentialE=$13
  blankLineTester=length($0)
}
#get initial geometry into file traj
print numAtoms >> "traj"
print potentialE,title1,title2,title3,title4,"runpoint 1 ","runisomer ","isomernum >> "traj"
for (i=1;i<=numAtoms;i++) {
  print atSym[i],geoArr[i,1],geoArr[i,2],geoArr[i,3] >> "traj"
}
#added by Samae on 102910
scfcount=0
} # end of BEGIN

#pull out the potential energy
/SCF Done/ //EUMP2 =// Energy=/ {
if (($1=="Energy=") && ($3=="NIter=")) newPotentialE=$2
if (($1=="SCF") && (scfcount==0)) newPotentialE=$5
if ($1=="E2") {
  tempstring=$6
  split(tempstring, arr10, "D")
  newPotentialE=arr10[1]*(10^arr10[2])
}
newPotentialEK=(newPotentialE-potentialE)*627.509
if ($1=="SCF") {
  if (scfcount==0) {
    pddga=$5
  }
  if (scfcount==1) {
    qm=$5
  }
  if (scfcount==2) {
    pddgb=$5
    pddgc=(pddga-pddgb)
    newPotentialE=(qm+pddgc)
    newPotentialEK=(newPotentialE-potentialE)*627.509
  }
  scfcount++
}
}

# now we go ahead and translate the forces and add them
(/ 1 // / 2 // / 3 // / 4 // / 5 // / 6 // / 7 // / 8 // / 9 // / 10 // /
11 // / 12 // / 13 // / 14 // / 15 // / 16 // / 17 // / 18 // / 19 // / 20 // /
21 // / 22 // / 23 // / 24 // / 25 // / 26 // / 27 // / 28 // / 29 // / 30 // /
31 // / 32 // / 33 // / 34 // / 35 /) && length($3) > 9 {
i=$1
for (j=1;j<=3;j++) {
  forceArr[i,j]=$2+j) #the raw units of the forces are Hartree/Bohr
}
if ((diag>1) && (i==1)) print "i,weight[i],forceArr[i,1],forceArr[i,2],forceArr[i,3]" >> "diagnostics"
if (diag>1) print i,weight[i],forceArr[i,1],forceArr[i,2],forceArr[i,3] >> "diagnostics"
}

END {
#put out Echeck but only if not a DRP
if (DRP==0) {
  print "trajectory #" ,isomernum >> "Echeck"
  print "point 1 potential E=",newPotentialEK," point 1 kinetic E=",KEinitmodes," Total=",newPotentialEK+KEinitmodes >>
"Echeck"
  print "desired total energy=", desiredModeEnK >> "Echeck"
  if ((newPotentialEK+KEinitmodes)>(desiredModeEnK+etolerance)) print "XXXX bad total Energy" >> "Echeck"
  if ((newPotentialEK+KEinitmodes)<(desiredModeEnK-etolerance)) print "XXXX bad total Energy" >> "Echeck"
}
}
# turn the forces into motion

```

```

for (i=1;i<=numAtoms;i++) {
  for (j=1;j<=3;j++) {
# conversions here take force to J/angstrom, 1E20 converts to kg angstroms / s^2, then mult time (s^s) and divide by weight in kg
to get angstroms
    forceArr[i,j]=0.5*1E20*forceArr[i,j]*627.509*(4184/(0.529177*avNum))*(timestep^2)/(weight[i]/(avNum*1000))
# for simplicity, DRPs will throw away the forces at the second pont. This means that if we are not at a saddlepoint, point 2 =
point 1 but this is a minor waste
    if (DRP==1) forceArr[i,j]=0
    arr[i,j]=arr[i,j]+forceArr[i,j]
# if atoms are fixed, replace calcd new position by original position
    if ((i==fixedatom1) || (i==fixedatom2) || (i==fixedatom3) || (i==fixedatom4)) arr[i,j]=geoArr[i,j]
  }
  if ((diag>1) && (i==1)) print "i,weight[i],forceArr[i,1],forceArr[i,2],forceArr[i,3]" >> "diagnostics"
  if (diag>1) print i,weight[i],forceArr[i,1],forceArr[i,2],forceArr[i,3] >> "diagnostics"
  printf("%s %f %f %f",atSym[i],arr[i,1],arr[i,2],arr[i,3])
  if ((i>highlevel) && (i<=highlevel+linkatoms)) printf(" %s","M H")
  if (i>(highlevel+linkatoms)) printf(" %s","M")
  print ""
}
print ""
if (length(meth5)>2) print meth5
if (length(meth6)>2) print meth6
if (methodfilelines>=1) {
  for (i=1;i<=methodfilelines;i++) {
    getline < "methodfile"
    print $0
  }
}
if ((nmrtype>0) && ((runpointnum % nmrevery)==0)) {
  print "--link1--"
  print "%nproc=" processors
  print "%mem=" memory
  print "%chk=" checkpoint
  print "# " nmrmethod " nmr=giao geom=check"
  if (nmrmethod==method) print "guess=tcheck"
  if (length(meth7)>2) print meth7
  print ""
  print title1,title2,title3,title4
  print "runpoint ",runpointnum
  print "runisomer ",isomernum
  print ""
  print charge,multiplicity
}
print ""
if ((nmrtype>1) && ((runpointnum % nmrevery)==0)) {
  print "--link1--"
  print "%nproc=" processors
  print "%mem=" memory
  print "%chk=" checkpoint
  print "# " nmrmethod2 " nmr=giao geom=check"
  if (length(meth7)>2) print meth7
  print ""
  print title1,title2,title3,title4
  print "runpoint ",runpointnum
  print "runisomer ",isomernum
  print ""
  print charge,multiplicity
}
print ""
if ((nmrtype>2) && ((runpointnum % nmrevery)==0)) {
  print "--link1--"
  print "%nproc=" processors
  print "%mem=" memory
  print "%chk=" checkpoint
  print "# " nmrmethod3 " nmr=giao geom=check"
  if (length(meth7)>2) print meth7
  print ""
  print title1,title2,title3,title4
  print "runpoint ",runpointnum
  print "runisomer ",isomernum
  print ""
  print charge,multiplicity
}

```

```

}
print ""
#get second geometry into file traj
print numAtoms >> "traj"
print newPotentialE,title1,title2,title3,title4,"runpoint ","runpointnum","runisomer ","isomernum >> "traj"
for (i=1;i<=numAtoms;i++) {
  print atSym[i],arr[i,1],arr[i,2],arr[i,3] >> "traj"
}
}

```

## Program progdynb

```

BEGIN { #this is the main routine for generating new .com files by the Verlet algorithm
# Aug 2010 increased elements handled automatically but only up to bromine!
# Jan 2009 - a number of little changes to improve reporting, precision, etc
# Nov 2008 added ability to handle DRPs
# Aug 2008 added long list of atoms to handle 1-17 without change
# May 2008 added option to put out velocities in vellist - make diag=3
# version Feb 2008 incorporates methodfile, boxon and boxsize
# version Jan 2008 incorporates fixed atoms, oniom, and velocity damping
# version August 2007 incorporates keepevery to decrease size of dyn file
# version Sept 11, 2005 - incorportates meth3, meth4, meth5, meth6, but not yet rotation

# default parameters, including quassiclassical, no displacements, transition state, not a DRP
# do not change these - rather, change progdyn.conf to set the parameters
initialDis=0; timestep=1E-15; scaling=1.0; temp=298.15
classical=0; numimag=1; DRP=0; cannonball=0
memory=20000000
diag=1; checkpoint="g09.chk"; searchdir="positive"; boxon=0
boxsize=10; maxAtomMove=0.1; title1="you"; title2="need"
title3="a"; title4="progdyn.conf"; processors=1; highlevel=999; linkatoms=0
damping=1;nonstandard=0
nmrtype=0;nmrevery=9999999;nmrcc=0;nmrrand=0;nmrdo=0
thermostat=0;thermostatmult=1.00

#initialization
srand(PROCINFO["pid"])
i=1;j=1;k=1
c=29979245800; h=6.626075E-34; avNum=6.0221415E23
RgasK=0.00198588; RgasJ=8.31447
numAtoms=0; atomnumber=0
conver1=4.184E26 #dividing by this converts amu ang^2 /s^2 to kcal/mol
OFS=" "

# read progdyn.conf for configuration info
blankLineTester=10
while (blankLineTester>1) {
  getline < "progdyn.conf"
  if ($1=="method") method=$2
  if ($1=="method2") meth2=$2
  if ($1=="charge") charge=$2
  if ($1=="multiplicity") multiplicity=$2
  if ($1=="memory") memory=$2
  if ($1=="processors") processors=$2
  if ($1=="checkpoint") checkpoint=$2
  if ($1=="timestep") timestep=$2
  if ($1=="diagnostics") diag=$2
  if ($1=="temperature") temp=$2
  if ($1=="thermostat") thermostat=$2
  if ($1=="thermostatmult") thermostatmult=$2
  if (thermostatmult>1) thermostatmult=1/thermostatmult
  if ($1=="method3") meth3=$2
  if ($1=="method4") meth4=$2
  if ($1=="method5") meth5=$2
  if ($1=="method6") meth6=$2
  if ($1=="method7") meth7=$2
  if ($1=="highlevel") highlevel=$2
  if ($1=="linkatoms") linkatoms=$2
  if ($1=="keepevery") keepevery=$2
  if ($1=="fixedatom1") fixedatom1=$2
}
}

```

```

if ($1=="fixedatom2") fixedatom2=$2
if ($1=="fixedatom3") fixedatom3=$2
if ($1=="fixedatom4") fixedatom4=$2
if ($1=="boxon") boxon=$2
if ($1=="boxsize") boxsize=$2
if ($1=="DRP") DRP=$2
if ($1=="maxAtomMove") maxAtomMove=$2
if ($1=="methodfile") methodfilelines=$2
if ($1=="killcheck") killcheck=$2
if ($1=="damping") damping=$2
if ($1=="NMRmethod") nmrmethod=$2
if ($1=="NMRmethod2") nmrmethod2=$2
if ($1=="NMRmethod3") nmrmethod3=$2
if ($1=="NMRtype") nmrtype=$2
if ($1=="NMRevery") nmrevery=$2
if ($1=="NMRrand") nmrrand=$2
if ($1=="loadlimit") loadlimit=$2
if ($1=="NMRcc") nmrcc=$2
if ($1=="nonstandard") nonstandard=$2
if ($1=="title") {
  title1=$2
  title2=$3
  title3=$4
  title4=$5
}
blankLineTester=length($0)
}

if (diag>=1) print "***** starting progdynb *****" >> "diagnostics"
if (diag>=1) print "method,charge,multiplicity,memory" >> "diagnostics"
if (diag>=1) print method,charge,multiplicity,memory >> "diagnostics"
if (diag>=1) print "processors,checkpoint,title" >> "diagnostics"
if (diag>=1) print processors,checkpoint,title1,title2,title3,title4 >> "diagnostics"

# get number of atoms and weights from geoPlusVel, and previous geometries from old and older
getline < "geoPlusVel"
numAtoms=$1
for (i=1;i<=numAtoms;i++) {
  getline < "geoPlusVel"
  weight[i]=$5; atSym[i]=$1
}

for (at=1;at<=numAtoms;at++) {
  getline < "old"
  oldarr[at,1]=$4; oldarr[at,2]=$5; oldarr[at,3]=$6
}

for (at=1;at<=numAtoms;at++) {
  getline < "older"
  olderarr[at,1]=$4; olderarr[at,2]=$5; olderarr[at,3]=$6
}

#for DRPs read in oldAdjForces and maxAtomMove
if (DRP==1) {
  for (at=1;at<=numAtoms;at++) {
    getline < "oldAdjForces"
    oldForce[at,1]=$1; oldForce[at,2]=$2; oldForce[at,3]=$3
  }
  getline < "maxMove"
  if (($1<maxAtomMove) && ($1>0)) maxAtomMove=$1
  if (maxAtomMove<0.000001) maxAtomMove=0.000001
}

# record atom velocities for IVR analysis. This is actually the velocity in the previous run, which is the easiest to calculate.
getline < "isomernumber"
isomernum = $1
getline < "runpointnumber"
runpointnum = $1
# routine to control whether NMR calculations are done.
if ((nmrrand==0) && ((runpointnum % nmrevery)==0)) nmrdo=1
if ((nmrrand==1) && (rand()<(1/nmrevery))) nmrdo=1
getline < "uptimelist"

```

```

x=1.0001*substr($10,1,3);if (x<8) x=8
# turn of nmrs if load is too high - this is under control of loadlimit parameter in progdyn.conf and requires proganal to make
uptimelist
if ((nmrrand==1) && (x>loadlimit)) nmrdo=0

if (diag==3) print "runpoint ",runpointnum-1,"runisomer ",isomernum >> "vellist"
for (at=1;at<=numAtoms;at++) {
  atomVel=((oldarr[at,1]-olderarr[at,1])^2 + (oldarr[at,2]-olderarr[at,2])^2 + (oldarr[at,3]-olderarr[at,3])^2)^.5
  KEatomstotal=KEatomstotal+0.5*weight[at]*(atomVel^2)/((timestep^2)*conver1)
  if (diag==3) print atomVel >> "vellist"
}
apparentTemp=KEatomstotal*2/(3*RgasK*numAtoms)
if (diag==4) print "KEatomstotal",KEatomstotal,"apparent Temperature",apparentTemp >> "vellist"
if (thermostat==1) {
  if (diag<4) print "KEatomstotal",KEatomstotal,"desired temperature",temp,"apparent Temperature",apparentTemp >> "vellist"
  if (apparentTemp>temp) damping=thermostatmult
  if (apparentTemp<temp) damping=1/thermostatmult
}
}

#pull out the potential energy
/SCF Done/ // /EUMP2 =// /Energy=// // /ONIOM:// {
if (($1=="Energy=") && ($3=="NIter=")) newPotentialE=$2
if ($1=="SCF") newPotentialE=$5
if ($2=="extrapolated") newPotentialE=$5
if ($1=="E2") {
  tempstring=$6
  split(tempstring, arr10, "D")
  newPotentialE=arr10[1]*(10^arr10[2])
}
}

#must adjust next line for weird atoms
(/ 1 // / 2 // / 3 // / 4 // / 5 // / 6 // / 7 // / 8 // / 9 // / 10 // /
11 // / 12 // / 13 // / 14 // / 15 // / 16 // / 17 // / 18 // / 19 // / 20 // /
21 // / 22 // / 23 // / 24 // / 25 // / 26 // / 27 // / 28 // / 29 // / 30 // /
31 // / 32 // / 33 // / 34 // / 35 /) && length($3) > 9 {
i=$1
for (j=1;j<=3;j++) {
  forceArr[i,j]=$2+j #the raw units of the forces are Hartree/Bohr
}
if ((diag>1) && (i==1)) print "i,weight[i],forceArr[i,1],forceArr[i,2],forceArr[i,3]" >> "diagnostics"
if (diag>1) print i,weight[i],forceArr[i,1],forceArr[i,2],forceArr[i,3] >> "diagnostics"
}

END {
#####routine for DRPs#####
if (DRP==1) {
  maxForce=0;oscillTest=0
  for (i=1;i<=numAtoms;i++) {
    for (j=1;j<=3;j++) {
# conversions here take force to J/angstrom, 1E20 converts to kg angstroms / s^2, then mult time (s^s) and divide by weight in kg
to get angstroms
      forceArr[i,j]=1E20*forceArr[i,j]*627.509*(4184/(0.529177*avNum))*(timestep^2)/(weight[i]/(avNum*1000))
      oscillTest=oscillTest+forceArr[i,j]*oldForce[i,j]
      if (forceArr[i,j]>maxForce) maxForce=forceArr[i,j]
      if ((0-forceArr[i,j])>maxForce) maxForce=-forceArr[i,j]
    }
    if (i==1) printf("% .8f % .8f % .8f\n",forceArr[1,1],forceArr[1,2],forceArr[1,3]) > "oldAdjForces"
    if (i>1) printf("% .8f % .8f % .8f\n",forceArr[i,1],forceArr[i,2],forceArr[i,3]) >> "oldAdjForces"
  }
  print "oscillTest ",oscillTest >> "oldAdjForces"
  if (oscillTest<0) {
    maxAtomMove = maxAtomMove*0.5
    print maxAtomMove > "maxMove"
  }
  if (oscillTest>0) {
    maxAtomMove = maxAtomMove*1.2
    print maxAtomMove > "maxMove"
  }
  print "maxAtomMove ",maxAtomMove >> "oldAdjForces"
  forceMult=maxAtomMove/maxForce
}
}

```

```

for (i=1;i<=numAtoms;i++) {
  for (j=1;j<=3;j++) {
    newarr[i,j]=oldarr[i,j]+forceMult*forceArr[i,j]
  }
}
}
#####

#####normal routine for Verlet #####
if (DRP==0) {
  for (i=1;i<=numAtoms;i++) {
    for (j=1;j<=3;j++) {
# conversions here take force to J/angstrom, 1E20 converts to kg angstroms / s^2, then mult time (s^s) and divide by weight in kg
to get angstroms
      forceArr[i,j]=1E20*forceArr[i,j]*627.509*(4184/(0.529177*avNum))*(timestep^2)/(weight[i]/(avNum*1000))
      if ((diag>1) && (i==1)) print "i,weight[i],forceArr[i,1],forceArr[i,2],forceArr[i,3]" >> "diagnostics"
      if (diag>1) print i,weight[i],forceArr[i,1],forceArr[i,2],forceArr[i,3] >> "diagnostics"
      newarr[i,j]=oldarr[i,j]+damping*(oldarr[i,j]-olderarr[i,j])+forceArr[i,j]
      if ((i==fixedatom1) || (i==fixedatom2) || (i==fixedatom3) || (i==fixedatom4)) newarr[i,j]=oldarr[i,j]
#turn around atoms outside the box
      if (boxon==1) {
        if (newarr[i,j]>boxsize) if (oldarr[i,j]>olderarr[i,j]) newarr[i,j]=oldarr[i,j]+damping*(olderarr[i,j]-oldarr[i,j])+forceArr[i,j]
        if (newarr[i,j]<-1*boxsize) if (oldarr[i,j]<olderarr[i,j]) newarr[i,j]=oldarr[i,j]+damping*(olderarr[i,j]-
oldarr[i,j])+forceArr[i,j]
      }
    }
  }
}
}
#####

if ((runpointnum % keepevery)==0) system("cat g09.log >> dyn")
print "%nproc=" processors
print "%mem=" memory
if (killcheck!=1) print "%chk=" checkpoint
if (nonstandard==0) {
  print "# " method " force scf=(tight_nosym) "
  if (meth2=="unrestricted") print "guess=mix" #for unrestricted calculations
  if (meth2=="read") print "guess=tcheck" #for reading orbitals from check, sometimes faster, sometimes not
  print "pop=none "
  if (length(meth3)>2) print meth3
  if (length(meth4)>2) print meth4
}
if (nonstandard==1) {
  print "# "
  print "nonstd"
  system("cat nonstandard")
}
print ""
print title1,title2,title3,title4
print "runpoint ",runpointnum
print "runisomer ",isomernum
if (DRP==1) print "maxForce and forceMult and maxAtomMove",maxForce,forceMult,maxAtomMove
print ""
print charge,multiplicity
print numAtoms >> "traj"
print newPotentialE,title1,title2,title3,title4,"runpoint ",runpointnum,"runisomer ",isomernum >> "traj"
for (i=1;i<=numAtoms;i++) {
  printf("%s %.7f %.7f %.7f",atSym[i],newarr[i,1],newarr[i,2],newarr[i,3])
  printf("%s %.7f %.7f %.7f",atSym[i],newarr[i,1],newarr[i,2],newarr[i,3]) >> "traj"
  print "" >> "traj"
  if ((i>highlevel) && (i<=highlevel+linkatoms)) printf(" %s","M H")
  if (i>(highlevel+linkatoms)) printf(" %s","M")
  print ""
}
print ""
if (length(meth5)>2) print meth5
if (length(meth6)>2) print meth6
if (methodfilelines>=1) {
  for (i=1;i<=methodfilelines;i++) {
    getline < "methodfile"
    print $0
  }
}
}

```

```

}
if ((nmrtype>0) && (nmrdo==1)) {
print "--link1--"
print "%nproc=" processors
print "%mem=" memory
print "%chk=" checkpoint
print "# " nmrmethod " nmr=giao geom=check"
if (nmrmethod==method) print "guess=tcheck"
if (length(meth7)>2) print meth7
print ""
print title1,title2,title3,title4
print "runpoint ",runpointnum
print "runisomer ",isomernum
print ""
print charge,multiplicity
}
print ""
if ((nmrtype>1) && (nmrdo==1)) {
print "--link1--"
print "%nproc=" processors
print "%mem=" memory
print "%chk=" checkpoint
print "# " nmrmethod2 " nmr=giao geom=check"
if (length(meth7)>2) print meth7
print ""
print title1,title2,title3,title4
print "runpoint ",runpointnum
print "runisomer ",isomernum
print ""
print charge,multiplicity
}
print ""
if ((nmrtype>2) && (nmrdo==1)) {
print "--link1--"
print "%nproc=" processors
print "%mem=" memory
print "%chk=" checkpoint
print "# " nmrmethod3 " nmr=giao geom=check"
if (length(meth7)>2) print meth7
print ""
print title1,title2,title3,title4
print "runpoint ",runpointnum
print "runisomer ",isomernum
print ""
print charge,multiplicity
}
print ""
if ((nmrcc==1) && (nmrdo==1)) {
print "CCSD(T) NMR calculation" > "ZMAT"
for (i=1;i<=numAtoms;i++) {
printf("%s %.7f %.7f %.7f",atSym[i],newarr[i,1],newarr[i,2],newarr[i,3]) >> "ZMAT"
print "" >> "ZMAT"
}
print "" >> "ZMAT"
print "*ACES2(CALC=CCSD[T],PROP=NMR,BASIS=dzp)" >> "ZMAT"
print "ABCDTYPE=AOBASIS,TREAT_PERT=SEQUENTIAL,CC_PROG=ECC" >> "ZMAT"
print "COORD=CARTESIAN" >> "ZMAT"
print "MEM_UNIT=GB,MEMORY=2)" >> "ZMAT"
print "" >> "ZMAT"
}
}

```

## Program progcfour

The last two lines below would have to be set up for the local environment.

```

#!/bin/bash
origdir=$1
workdir=$2

```

```

cd $origdir
echo "starting cfour calculation"
date
mv x.log tempcfour.log
cd $workdir
rm -f -r tempcfour
mkdir tempcfour
mv CSH* tempcfour
mv GRD tempcfour
mv MOLDEN_NAT tempcfour
mv OPTARC tempcfour
mv AUXMOI tempcfour
mv DERINT tempcfour
mv FILES tempcfour
mv GAMLAM tempcfour
mv IIII tempcfour
mv IIJ tempcfour
mv IJJ tempcfour
mv IJKL tempcfour
mv JAINDX tempcfour
mv JMOL.plot tempcfour
mv JOBARC tempcfour
mv MOABCD tempcfour
mv MOINTS tempcfour
mv MOL tempcfour
mv MOLDEN tempcfour
mv MOLECULE.INP tempcfour
mv NEWMOS tempcfour
mv PPPAA tempcfour
mv PPPHAA tempcfour
mv HHHHAA tempcfour
mv PHPHAA tempcfour
mv PPHHAA tempcfour
mv PHHHAA tempcfour
PATH=/data/d-singleton/cfour/cfour_v1_64bit/bin:$PATH
/data/d-singleton/cfour/cfour_v1_64bit/bin/xcfour > $origdir/x.log

```

### Program randgen.c

This is compiled before use to give the service program *randgen*

```

#include <stdio.h>
#include <stdlib.h>

int a,b,c;
double d;

int product(int x, int y);

int main(void)
{
  int count=1;
  srand48(time (0));
  while (count<=100000)
  {
    d = drand48();
    printf ("%f\n", d);
    count++;
  }
  return 0;
}

```

### Program proganal

```

BEGIN {
firsttitle=1
getline < "isomernumber"
isomer=$1
}
/ alame3/ {

```



```

if (firsttitle==1) {
  printf("%s %s %s %s %s %s %s ",$1,$2,$3,$4,$6,$7,$8)
  runpoint=$6
}
firsttitle++
}
/Standard orientation/./Rotational constants/ {
if (($1>.5) && ($1<30)) {
  A[$1]=$4;B[$1]=$5;C[$1]=$6
}
}
/before annihilation/ {
printf("%s %.5f " ,$1,$6)
}

END {
  C1N6=Distance(1,6)
  C3C8=Distance(3,8)
  C1C8=Distance(1,8)
  printf("%s %.3f %s %.3f %s %.3f " ,C1N6",C1N6,"C3C8",C3C8,"C1C8",C1C8)
  if (runpoint>500) {
    print "Too many points. XXXXN"
    # system("date > nogo")
  }
  if ((C1N6>2.5) && (C3C8<1.8)) {
    getline < "skipstart"
    # if ($1=="reverse") system("date > nogo")
    print "2,3-Rearrangement XXXX23N"
  }
  if ((C1N6>2.5) && (C1C8<1.8)) {
    getline < "skipstart"
    # if ($1=="reverse") system("date > nogo")
    print "1,2-Rearrangement XXXX12N"
  }
  if ((C1N6>3.4) && (C3C8>3.4) && (C1C8>3.4)) {
    getline < "skipstart"
    # if ($1=="reverse") system("date > nogo")
    print "Dissociation XXXXD"
  }
  if ((C1N6<1.6) && (C3C8>2.8)) {
    getline < "skipstart"
    # if ($1=="reverse") system("date > nogo")
    print "reformed starting material XXXX23N"
  }
  system("date '+%b:%d:%Y %T'")
  system("tail -1 Echeck | grep XXXX")
}

function Distance(Atom1,Atom2) {
  return sqrt((A[Atom1]-A[Atom2])^2 + (B[Atom1]-B[Atom2])^2 + (C[Atom1]-C[Atom2])^2)
}

function Angle(Atom1,Atom2,Atom3) {
  value=((-
Distance(Atom1,Atom3)^2+Distance(Atom1,Atom2)^2+Distance(Atom2,Atom3)^2)/(2*Distance(Atom1,Atom2)*Distance(Atom2,Atom3)))
  return acos(value)
}

function asin(x) { return (180/3.141592)*atan2(x, sqrt(1-x*x)) }

function acos(x) { return (180/3.141592)*atan2(sqrt(1-x*x), x) }

function atan(x) { return (180/3.141592)*atan2(x,1) }

function Dihedral(Atom1,Atom2,Atom3,Atom4) {
  B1x=A[Atom2]-A[Atom1]
  B1y=B[Atom2]-B[Atom1]
  B1z=C[Atom2]-C[Atom1]
  B2x=A[Atom3]-A[Atom2]
  B2y=B[Atom3]-B[Atom2]
  B2z=C[Atom3]-C[Atom2]
}

```

```

B3x=A[Atom4]-A[Atom3]
B3y=B[Atom4]-B[Atom3]
B3z=C[Atom4]-C[Atom3]
modB2=sqrt((B2x^2)+(B2y^2)+(B2z^2))
# yAx is x-coord. etc of modulus of B2 times B1
yAx=modB2*(B1x)
yAy=modB2*(B1y)
yAz=modB2*(B1z)
# CP2 is the crossproduct of B2 and B3
CP2x=(B2y*B3z)-(B2z*B3y)
CP2y=(B2z*B3x)-(B2x*B3z)
CP2z=(B2x*B3y)-(B2y*B3x)
termY=((yAx*CP2x)+(yAy*CP2y)+(yAz*CP2z))
# CP is the crossproduct of B1 and B2
CPx=(B1y*B2z)-(B1z*B2y)
CPy=(B1z*B2x)-(B1x*B2z)
CPz=(B1x*B2y)-(B1y*B2x)
termX=((CPx*CP2x)+(CPy*CP2y)+(CPz*CP2z))
dihed4=(180/3.141592)*atan2(termY,termX)
return dihed4
}

function killdyn(isomer) {
  system("rm -f dyn")
}

```

## progdyn.conf

```

#This is the configuration file for PROGDYN. This file is read by progdynstarterHP and
# the awk programs proggenHP, prog1stpoint, prog2ndpoint, and progdynb.
#The programs won't read anything past the first blank line,
#and this file must end with a blank line.
#The program has a number of default values but they are unlikely to be what you want.
#Do not delete lines - rather, comment out lines for unwanted options.
#The values here are read repeatedly and most can be changed in the middle of running jobs
#***The keywords are case sensitive. The following keywords should always be defined:***
#***method, charge, multiplicity, memory, processors, title
#*** method --The following word is copied exactly to the gaussian input file.
method UB3LYP/6-31G*
#To do a nonstandard route, make nonstandard 1. For normal calcs, use nonstandard 0 or else leave it out.
#Then make a file called "nonstandard" containing the nonstandard route with no extra lines.
nonstandard 0
# NMRoptions As is NMR=1 will add a section for an NMR calc at every NMRevery intervals. If you want to combine the two
use nonstandard
#NMRtype 1
#NMRmethod B3LYP/cc-pvtz
#NMRevery 4
#geometry linear
rotationmode 1
#*** method2 --The options here are restricted, unrestricted, and read. restricted is the default
#If the method is U..., put unrestricted here and the .com files will have in them guess=mix.
#If you put read here, the .com files will contain guess=tcheck, which sometimes makes things faster, sometimes not.
#The use of read requires a specifically defined checkpoint file name using the keyword checkpoint.
method2 unrestricted
charge 0
multiplicity 1
processors 2
#*** memory --The following "word" is copied exactly to the gaussian input file after %mem=.
memory 200mw
#*** killcheck and checkpoint -- You can use a specifically defined checkpoint file name by putting
#the name after the keyword checkpoint. This is necessary if you use the read option with method2.
#Defined checkpoint names are an unnecessary modest hassle and if you do not want to bother, use killcheck 1
killcheck 1
#checkpoint g09.chk
#*** diagnostics -- 0 prints out nothing extra, 1 (default) prints out extra stuff to a
#file "diagnostics", 2 adds more stuff, 3 adds velocities to a file "vellist"
#4 adds the apparent temperature to vellist, but this is meaningless with quasiclassical calculations
diagnostics 0
#*** title -- the title keyword must be followed by exactly four words
title alame3 XC UB3D2PCM 363dis2

```

```

**** initialdis -- 0 (default) turns off displacement of the normal modes, so that all trajectories start from the same place
# and only the energies and signs of the motion in the modes are randomized
# 1 gives a flat distribution of displacements where all of the possible values are equally likely
# 2 (recommended) gives a QM-like gaussian distribution of displacements, so that displacements in the middle are more likely
that
# those at the end by 1/e
initialdis 2
**** timestep -- this is the time between points in the trajectory. Typical values would be 1E-15 or 0.5E-15 or 0.25E-15
timestep 1E-15
**** scaling -- this lets you scale the gaussian frequencies by a constant
scaling 1.0
temperature 363.15
**** method3, method4, method5, and method6 -- These keywords let you add extra lines to the gaussian input file.
#method3 and method4 add lines at the top of the input after the lines defining the method, and
#this is useful to implement things like the iop for mPW1k
#method5 and method6 add lines after the geometry, after a blank line of course
#only a single term with no spaces can be added, one per method line. Here are some examples to uncomment if needed
#method4 IOp(3/76=0572004280)
method3 scrf=(pcm.solvent=acetonitrile)
#add the line below with big structures to get it to put out the distance matrix and the input orientation
#method3 iop(2/9=2000)
method4 iop(3/124=3)
#method5 radii=bondi
#method6
**** methodfile -- This keyword lets you add more complicated endings to gaussian input files
#such as a gen basis set. Put after the keyword the number of lines in a file you create called
#methodfile that contains the test you want to add to the end of the gaussian input
methodfile 0
**** numimag --This tells the program the number of imaginary frequencies in the starting structure.
#if 0, treats as ground state and direction of all modes is random
#if 1, motion along the reaction coordinate will start out in the direction defined by searchdir
#if 2, only lowest freq will go direction of searchdir and other imag mode will go in random direction
numimag 1
**** searchdir -- This keyword says what direction to follow the mode associated with the imaginary frequency.
#The choices are "negative" and "positive". Positive moves in the direction defined in the gaussian frequency calculation
#for the imaginary frequency, while negative moves in the opposite direction. The correct choice can be made either
#by a careful inspection of the normal modes and standard orientation geometry, or by trial and error.
searchdir positive
**** classical -- for quassiclassical dynamics, the default, use 0. for classical dynamics, use 1
#if there are no normal modes and the velocities are to be generated from scratch, use classical 2
classical 0
**** DRP, saddlepoint, and maxAtomMove --to run a DRP use 'DRP 1' in the line below, otherwise leave it at 0 or comment it
out
#the treatment of starting saddlepoints is not yet implemented so use saddlepoint no
#if DRP shows oscillations then decrease maxAtomMove
#DRP 1
#saddlepoint no
#maxAtomMove 0.01
**** cannonball -- The program can "fire" a trajectory from a starting position toward a particular target, such as toward
#a ts. To use this, make a file cannontraj with numAtom lines and three numbers per line that defines the vector
#for firing the trajectory, relative to the starting geometry's standard orientation. The number following cannonball sets
#the extra energy being put into the structure in kcal/mol
#cannonball 10
**** keepevery --This tells the program how often to write the gaussian output file to file dyn, after the first two points.
#Use 1 for most dynamics to start with, but use a higher number to save on disk space or molden loading time.
keepevery 99
**** highlevel --For ONIOM jobs, the following line states the number of highlevel atoms,
#which must come before the medium level atoms. Use some high value such as 999 if not using ONIOM
highlevel 999
**** fixedatom1, fixedatom2, fixedatom3, and fixedatom4 - These fix atoms in space.
#Fixing one atom serves no useful purpose and messes things up, while fixing two atoms
#fixes one distance and fixing three has the effect of fixing three distances, not just two
#in current form fixed atoms only are meant to work with no displacements, that is, initialdis=0
#fixedatom1 2
#fixedatom2 3
#fixedatom3 19
**** boxon and boxsize - With boxon 1, a cubic box is set such that atoms that reach the edge
#are reflected back toward the middle. Useful for dynamics with solvent molecules. This is a crude
#implementation that is ok for a few thousand femtoseconds but will not conserve energy long term.
#Set the box size so as to fit the entire initial molecule but not have too much extra room.
#The dimensions of the box are two times the boxsize, e.g. boxsize 7.5 leads to a box that is 15 x 15 x 15 angstroms
boxon 0

```

```

boxsize 7.5
**** displacements -- This keyword lets you set the initialdis of particular modes by using a series of lines of the format
# displacements NumberOfMode InitialDisForThatMode, as in the example below. You should be able to do as many of these as
you like
# you might consider this for rotations where a straight-line displacement goes wrong at large displacements
# The choices for InitialDisForThatMode are 0, 1, 2, and 10, where 10 does the same thing as 0 but is maintained for now
because
# a previous version of the program had a bug that made 0 not work.
#displacements 2 0
#displacements 3 0
**** etolerance --This sets the allowable difference between the desired energy in a trajectory and the actual
#energy, known after point 1 from the potential energy + the kinetic energy in the initial velocities.
#The unit is kcal/mol and 1 is a normal value for mid-sized organic systems. For very large and floppy molecules, a larger value
#may be needed, but the value must stay way below the average thermal energy in the molecule (not counting zpe).
#If initialdis is not 0 and few trajectories are being rejected, decrease the value.
etolerance 2
**** controlphase --It is sometimes useful to set the phase of particular modes in the initialization of trajectories.
#The format is controlphase numberOfModeToControl positive or controlphase numberOfModeToControl negative.
#controlphase 2 positive
**** damping -- The damping keyword lets you add or subtract energy from the system at each point, by multiplying the
velocities
#by the damping factor. A damping of 1 has no effect, and since you mostly want to change the energy slowly, normal values
range
#from 0.95 to 1.05. The use of damping lets one do simulated annealing - you add energy until the structure is moving enough
#to sample the kinds of possibilities you are interested in, then you take away the energy slowly.
damping 1
**** reversetraj --This keyword sets the trajectories so that both directions from a transition state are explored.
reversetraj true

#updated Aug 9, 2007 to include the possibility of classical dynamics by the keyword classical
#updated Jan 2008 to include fixed atoms, ONIOM jobs, keepevery, and box size
#update Feb 2008 to include methodfile parameter
# updated Nov 2008 to allow for start without an initial freq calc using classical = 2
# update Aug 2010 to include etolerance, damping controlphase and reversetraj

```

## Sample Input Files for Gaussrate

The sample input files below are the ones used for B3LYP/6-31G\*/D2 calculations for the rearrangement of **2** via the lowest-energy exo s-cis transition structure (as shown in Figure 1 of the main text). In the example shown, the esp.fu71, esp.fu73, and esp.fu75 files are not actually used for the calculation, but these files are shown because they were used in an initial crude calculation to establish the starting geometries. The starting geometries were then taken from the esp.fu61 output file for the crude calculation and put in the poly.fu5 file for the production calculation.

Isotope effect calculations: The calculation shown provides as one of its outputs a poly.fu31 file. To calculate isotope effects, the poly.fu31 file was modified to add the "KIES" command, then the polyrate calculation was reran using the option in poly.fu5

\*ENERGETICS

potential unit31

with the various isotopic substitutions denoted in the standard Gaussrate / Polyrate fashion.

### poly.fu5

\*General

```

TITLE
23 on parent for isotope effects
END

```

## ATOMS

1 C  
 2 O  
 3 C  
 4 C  
 5 N  
 6 C  
 7 O  
 8 C  
 9 C  
 10 C  
 11 C  
 12 H  
 13 H  
 14 H  
 15 H  
 16 H  
 17 H  
 18 H  
 19 H  
 20 H  
 21 H  
 22 H  
 23 H  
 24 H  
 25 H  
 26 H

END

NOSUPERMOL

WRITEFU31 ON  
 INPUNIT AU

\*OPTIMIZATION

OPTMIN OHOOK  
 OPTTS OHOOK

\*SECOND

HESSCAL HHOOK

\*REACT1

STATUS 2

SPECIES NONLINRP

GEOM

|    |             |             |              |
|----|-------------|-------------|--------------|
| 1  | 3.85039041  | -1.67470171 | -4.57817476  |
| 2  | 5.36839215  | 0.54831811  | -4.64688766  |
| 3  | 5.56401497  | 1.68543016  | -7.01809061  |
| 4  | 7.16092270  | 3.76837714  | -6.95650532  |
| 5  | 7.32483886  | 5.40477321  | -9.21216438  |
| 6  | 8.93749650  | 7.64016019  | -8.58931252  |
| 7  | 4.39353621  | 0.76866367  | -8.86481910  |
| 8  | 8.53638925  | 3.99721579  | -11.36809590 |
| 9  | 4.72161444  | 6.35664332  | -10.18895270 |
| 10 | 3.30700582  | 7.85816685  | -8.26222183  |
| 11 | 1.66673719  | 6.76860077  | -6.68506234  |
| 12 | 3.89469007  | -2.32693299 | -2.61710371  |
| 13 | 1.89571931  | -1.28068899 | -5.14461587  |
| 14 | 4.60175798  | -3.14970479 | -5.82662769  |
| 15 | 7.70725788  | 4.67260659  | -5.21218459  |
| 16 | 10.43344040 | 3.45712315  | -10.77083450 |
| 17 | 7.37922236  | 2.33136268  | -11.72030770 |
| 18 | 8.60592268  | 5.22831581  | -13.02780280 |
| 19 | 10.78345730 | 6.94432980  | -7.98763065  |
| 20 | 9.10894854  | 8.82557573  | -10.27027780 |
| 21 | 8.03801527  | 8.68237957  | -7.05497100  |
| 22 | 5.12567058  | 7.45571597  | -11.89227460 |
| 23 | 3.72646362  | 4.61848791  | -10.66941190 |
| 24 | 3.68588154  | 9.87642533  | -8.15214797  |
| 25 | 1.29141107  | 4.75066204  | -6.79925029  |

26 0.65102332 7.84775912 -5.26111852  
END

\*PROD1  
STATUS 2  
SPECIES NONLINRP  
GEOM

|    |             |             |              |
|----|-------------|-------------|--------------|
| 1  | 3.94014407  | -1.55165936 | -4.34093198  |
| 2  | 4.74938431  | 0.95503066  | -5.04352795  |
| 3  | 5.25004493  | 1.29635872  | -7.51457979  |
| 4  | 5.85836637  | 4.07752950  | -8.03012564  |
| 5  | 7.49376618  | 4.29243331  | -10.24672930 |
| 6  | 7.87576351  | 6.91111027  | -11.04206380 |
| 7  | 5.11334464  | -0.37213040 | -9.08288042  |
| 8  | 9.95280078  | 3.12597138  | -9.74575242  |
| 9  | 2.33235942  | 10.08890660 | -8.84597719  |
| 10 | 3.28740735  | 8.17957161  | -7.50857040  |
| 11 | 3.27189395  | 5.45398801  | -8.32779796  |
| 12 | 3.60729402  | -1.47553593 | -2.30836939  |
| 13 | 2.20624768  | -2.05047114 | -5.35061852  |
| 14 | 5.41588259  | -2.92732315 | -4.79177851  |
| 15 | 6.79039426  | 4.83580447  | -6.31731076  |
| 16 | 10.95895600 | 4.05548723  | -8.16241540  |
| 17 | 9.71627353  | 1.12179007  | -9.29693976  |
| 18 | 11.13171050 | 3.27808781  | -11.44101690 |
| 19 | 8.70549623  | 8.09858180  | -9.53147264  |
| 20 | 9.17096946  | 6.91962367  | -12.65809330 |
| 21 | 6.09145969  | 7.76705753  | -11.62143590 |
| 22 | 2.33048956  | 12.01468590 | -8.12875707  |
| 23 | 1.52215376  | 9.78347471  | -10.71353270 |
| 24 | 4.09883831  | 8.53875869  | -5.64796616  |
| 25 | 2.63522262  | 5.26460176  | -10.29022150 |
| 26 | 1.89508964  | 4.45712645  | -7.13414368  |

END

\*START

STATUS 2  
SPECIES NONLINTS  
GEOM

|    |             |             |             |
|----|-------------|-------------|-------------|
| 1  | -1.59273884 | -5.45598460 | 3.45090083  |
| 2  | -0.16021435 | -3.16988400 | 3.26261579  |
| 3  | -0.00246963 | -2.16410217 | 0.87272281  |
| 4  | 1.28482578  | 0.19966195  | 0.91460003  |
| 5  | 1.92060183  | 1.50429079  | -1.25566462 |
| 6  | 3.47959932  | 3.75117172  | -0.72827752 |
| 7  | -0.95251551 | -3.24966058 | -0.97019252 |
| 8  | 2.88617125  | 0.06962607  | -3.44839837 |
| 9  | -1.36155112 | 3.17567432  | -2.83405487 |
| 10 | -2.45919904 | 4.03868695  | -0.57547037 |
| 11 | -3.36692472 | 2.32899754  | 1.14476062  |
| 12 | -1.52910733 | -5.99272178 | 5.44324524  |
| 13 | -3.55283720 | -5.15357987 | 2.85390866  |
| 14 | -0.76596998 | -6.94924365 | 2.27943840  |
| 15 | 1.80228315  | 1.03547940  | 2.70284161  |
| 16 | 4.81226093  | -0.58680698 | -3.04784257 |
| 17 | 1.64577706  | -1.53472760 | -3.78783287 |
| 18 | 2.90426784  | 1.32937425  | -5.08605687 |
| 19 | 5.32073493  | 3.16917662  | 0.02746986  |
| 20 | 3.74207922  | 4.81122542  | -2.47947837 |
| 21 | 2.49385955  | 4.92667269  | 0.65346200  |
| 22 | -0.55129957 | 4.48885484  | -4.18946207 |
| 23 | -1.95304625 | 1.35695320  | -3.58298087 |
| 24 | -2.11903247 | 5.98314354  | 0.00946661  |
| 25 | -3.87986551 | 0.43515672  | 0.55083658  |
| 26 | -3.91383792 | 2.89171194  | 3.04371007  |

END

# end of start section

\*PATH

SCALEMASS 1.00

RODS ON

INTMU 3  
SSTEP 0.005  
INH 10

SRANGE  
SLP 2.61  
SLM -2.61  
END

RPM pagem

SIGN REACTANT

IDIRECT 1

COORD CURV3

INTDEF  
11-4 11-3 3-4-11 4-11-10  
2-1 3-2 4-3 5-4 6-5 7-3 8-5 9-5 10-9 11-10 12-1  
13-1 14-1 15-4 16-8 17-8 18-8 19-6 20-6 21-6 22-9  
23-9 24-10 25-11 26-11 3-2-1 4-3-2 5-4-3 6-5-4  
7-3-2 8-5-4 9-5-4 10-9-5 11-10-9 12-1-2 13-1-2  
14-1-2 15-4-3 16-8-5 17-8-5 18-8-5 19-6-5 20-6-5  
21-6-5 22-9-10 23-9-10 24-10-9 25-11-10 26-11-10  
4-3-2-1 5-4-3-2 6-5-4-3 7-3-2-1 8-5-4-3 9-5-4-3  
10-9-5-4 11-10-9-5 12-1-2-3 13-1-2-3 14-1-2-3  
15-4-3-2 16-8-5-4 17-8-5-4 18-8-5-4 19-6-5-4  
20-6-5-4 21-6-5-4 22-9-10-11 23-9-10-11 24-10-9-5  
25-11-10-9 26-11-10-9  
END

FREQSCALE 1.000000

PRPATH  
COORD 2 4  
INTERVAL 1  
XMOL  
END

#END

\*TUNNEL

QUAD  
NQE 40  
NQTH 40  
END

SCT

\*RATE

FORWARDK

SIGMAF 1  
CVT  
PRDELG ON  
# PRGIGT ON

TEMP  
298.15  
END

**esp.fu70**

\*GRGENERAL

GRRESTART  
RSTTOL 0.00001

\*GRSTART

CHARGE 0  
MULTIPLICITY 1

\*GRREACT1

CHARGE 0  
MULTIPLICITY 1

\*GRPROD1

CHARGE 0  
MULTIPLICITY 1

\*GRCOMMON

GRENER  
#p B3LYP/6-31G\* FCHK NOSYMM UNITS=AU  
scf=tight iop(3/124=3) scrf=(pcm,solvent=n,n-DiMethylFormamide)  
int(grid=ultrafine)  
ENDGRFIRST  
#p B3LYP/6-31G\* FORCE FCHK NOSYMM UNITS=AU  
scf=tight iop(3/124=3) scrf=(pcm,solvent=n,n-DiMethylFormamide)  
int(grid=ultrafine)  
ENDGRSEC  
#p B3LYP/6-31G\* FREQ=NORAMAN FCHK NOSYMM UNITS=AU  
scf=tight iop(3/124=3) scrf=(pcm,solvent=n,n-DiMethylFormamide)  
int(grid=ultrafine)  
ENDGRLINK0  
%chk=g09.chk  
%nproc=8  
%mem=7gb  
END**esp.fu71**%nproc=8  
%mem=3gb  
%chk=g09.chk  
#p B3LYP/6-31G\* opt=loose fchk NOSYMM  
scf=tight int(grid=ultrafine)  
scrf=(pcm,solvent=n,n-DiMethylFormamide)  
iop(3/124=3)

sm for 23 from opt of ts

0 1

C,0.2.0375388467,-0.8862139749,-2.4226657382  
O,0.2.840830771,0.2901574472,-2.4590270401  
C,0.2.9443499088,0.8918912279,-3.7138135966  
C,0.3.7893970873,1.9941392954,-3.6812240659  
N,0.3.8761377809,2.8600828001,-4.8748674307  
C,0.4.7295194509,4.0429986429,-4.5452684222  
O,0.2.3249592261,0.406759293,-4.6910602271  
C,0.4.5172626373,2.1152354958,-6.0157372728  
C,0.2.4985707517,3.3637907671,-5.3917615721  
C,0.1.7499921087,4.158362798,-4.3721794846



```

C,0,0.8819993356,3.5817892612,-3.5375826263
H,0,2.0609812186,-1.2313599052,-1.3849116377
H,0,1.0031714503,-0.6777114272,-2.7224134647
H,0,2.4351454424,-1.6667519863,-3.0833185763
H,0,4.0785052086,2.4726369101,-2.7581692899
H,0,5.521138878,1.8294307768,-5.6996801311
H,0,3.9049162892,1.2337039969,-6.2021197346
H,0,4.5540581437,2.7667055673,-6.8940163355
H,0,5.7063598314,3.67478106,-4.226872092
H,0,4.8202479598,4.6702935273,-5.434796919
H,0,4.2535344856,4.5945173864,-3.733329859
H,0,2.7123880505,3.9453949672,-6.293120655
H,0,1.9719596179,2.4439985403,-5.6460096185
H,0,1.9504845071,5.2263791882,-4.3139309066
H,0,0.6833853073,2.513942079,-3.5980082897
H,0,0.3445067045,4.1528552656,-2.7840640136

```

### esp.fu73

```

%nproc=8
%mem=3gb
%chk=g09.chk
#p B3LYP/6-31G* opt=loose fchk NOSYMM
scf=tight int(grid=ultrafine)
scrf=(pcm,solvent=n,n-DiMethylFormamide)
iop(3/124=3)

```

23 product

0 1

```

C,0,2.0850344388,-0.8211027674,-2.2971222658
O,0,2.5132659316,0.5053804567,-2.6689200443
C,0,2.7782041207,0.6860034863,-3.9765443583
C,0,3.100113961,2.1577356774,-4.2493594702
N,0,3.9655302665,2.2714578763,-5.4223356296
C,0,4.1676745503,3.657202043,-5.8432085134
O,0,2.7058654432,-0.1969229265,-4.8064533057
C,0,5.2667953344,1.6541928076,-5.1572300635
C,0,1.2342314461,5.3388194363,-4.6810895166
C,0,1.7396210438,4.328442874,-3.9733643265
C,0,1.7314117053,2.886126149,-4.4068808756
H,0,1.9088977799,-0.7808199834,-1.2215364703
H,0,1.1674959901,-1.0850625948,-2.8314253711
H,0,2.8659616298,-1.549072691,-2.5356999757
H,0,3.5933218785,2.5589975101,-3.3429768749
H,0,5.7992297687,2.1460714141,-4.3193641954
H,0,5.1416305052,0.5936257383,-4.9197286315
H,0,5.890647507,1.7346893566,-6.0543253873
H,0,4.6067501947,4.2855849088,-5.0438380833
H,0,4.8530680213,3.6617071358,-6.6983744651
H,0,3.2234616346,4.1101498203,-6.1497990052
H,0,1.2332419576,6.3578979475,-4.3015529778
H,0,0.8054890768,5.177191837,-5.6693573206
H,0,2.1690118177,4.5185164901,-2.9887749669
H,0,1.3944997525,2.7859072655,-5.4453506671
H,0,1.0028382437,2.3586097323,-3.7752262383

```

### esp.fu75

```

%nproc=8
%mem=3gb
%chk=g09.chk
#p B3LYP/6-31G* opt=(ts,calcfc,noeigentest) fchk NOSYMM
scrf=(pcm,solvent=n,n-DiMethylFormamide)
int(grid=ultrafine)
iop(3/124=3)

```

ts for 23 parent

0 1

```
C,0,1.9736117658,-0.7967995959,-2.3687400088
O,0,2.7316710775,0.4129527354,-2.4683761612
C,0,2.8151459858,0.945189561,-3.7330530571
C,0,3.4963533784,2.1960396602,-3.7108925905
N,0,3.8327915746,2.8864195039,-4.8593471787
C,0,4.6577775155,4.0754176834,-4.5802659421
O,0,2.3124033596,0.3707367886,-4.7082818509
C,0,4.3437489067,2.1272276342,-6.0196919224
C,0,2.0959510367,3.770877575,-5.6945953473
C,0,1.515100776,4.2275641901,-4.4994038813
C,0,1.0347530351,3.3228355195,-3.5890968503
H,0,2.0072841125,-1.0808286802,-1.3144367545
H,0,0.9363723885,-0.6367739069,-2.6846546614
H,0,2.4111190052,-1.5869982518,-2.9886512311
H,0,3.7701800247,2.6383352028,-2.7645959006
H,0,5.3629916871,1.7798582257,-5.8077268786
H,0,3.6873605708,1.2782402373,-6.1993128949
H,0,4.3533252091,2.7938576585,-6.8863034575
H,0,5.6320645427,3.7674391414,-4.1803416558
H,0,4.7966758975,4.6363739415,-5.5069614963
H,0,4.1361464932,4.6974660086,-3.8490808795
H,0,2.5247176932,4.465782776,-6.4118459336
H,0,1.782945297,2.8084518131,-6.0909099038
H,0,1.6951091734,5.256526301,-4.1898685671
H,0,0.7633164601,2.3206581215,-3.9033879127
H,0,0.7453390331,3.6206111562,-2.5842160821
```

## NMR Integration Macro

The listing below shows a sample macro for the output of NMR integrations. The spectra were first carefully phased by hand and the phases were recorded for use in the macro. The integration cut points shown in the macro were in each case used for both the sample and the standard.

### Macro "macrokie2"

```
shell('rm /home/singleton/dsingle/dastemp2')
$filename='/nmrdata/singleton/scollins/SEAN-KIE2-STANDARD-ERIK-CUT-OME'
$filenameshort='SEAN-KIE2-STANDARD'
rt($filename)

rp=-21.5
lp=-269.7
$cut[1]=.6
$cut[2]=1.06
$cut[3]=.68
$cut[4]=.44
$cut[5]=.30
$cut[6]=.38
$cut[7]=.57

setlimit('fn',2097152,8,2)
fn=1048576
wft('all')
wc=550
axis='p'
```

"For this program the argument is the number of spectra to be worked up in the array"  
if (\$#<1) then \$numspec=6 else \$numspec=\$1 endif

```

$multiplier=8

$spectrum=1
repeat
ds($spectrum)

"First, I want to get the full spectrum, set some basics and set the shifts"
$totalwidth=0
$sp=sp $wp=wp
vp=12 f intmod='partial' cz vs=160 th=5 nm

"count lines in case something is going wrong and exit if so"
nll('pos',20):$count
if ($count<5 or $count>15) then
  text
  echo('Problem with wrong number of peaks.')
  return
endif

"-----Setting shifts-----"
"get carbonyl set to 171.6 then find chlororm and set it at 77.00"
getll(1):$ht,$freq
cr=$freq
rl(171.5p)
sp=76.0p wp=4p
repeat
  nll('pos',10):$count
  if ($count<3) then th=th-1 endif
  if ($count>3) then th=th+1 endif
  nll('pos',10):$count
until ($count=3)
getll(2):$ht,$freq
cr=$freq rl(77.00p) f
"-----"

"-----Setting the level-----"
"to turn off this section make the next line false"
if (1<2) then
  f cz intmod='partial'
  z(80p,110p)
  repeat
    integ(79p,111p):$intmid
    echo($intmid)
    if ($intmid>0) then lvl=lvl-1 endif
    integ(69p,111p):$intmid
  until ($intmid<0)
  repeat
    integ(69p,111p):$intmid
    echo($intmid)
    if ($intmid<0) then lvl=lvl+.1 endif
    integ(69p,111p):$intmid
  until ($intmid>0)
  repeat
    integ(69p,111p):$intmid
    echo($intmid)
    if ($intmid>0) then lvl=lvl-.01 endif

```

```

    integ(69p,111p):$intmid
until ($intmid<0)
cz
sp=$sp wp=$wp
endif
"-----"

"-----Cutting integrations-----"
"to turn off this section make the next line false, to turn it on make the line true"
if (2>1) then

cz
"1 now focus on carbonyl ono far left and cut it"
sp=170p wp=3p
repeat
  nll('pos',144):$count
  if ($count<1) then th=th-1 endif
  if ($count>1) then th=th+1 endif
  nll('pos',144):$count
until ($count=1)
$i=1
repeat
  getll($i):$ht,$freq
  dres($freq):$lw
  $totalwidth=$totalwidth+$lw
  z($freq+$cut[$i]*$multiplier,$freq-$cut[$i]*$multiplier)
  $i=$i+1
until ($i>1)

"2 now focus on second peak from the left"
sp=133p wp=3p
repeat
  nll('pos',20):$count
  if ($count<1) then th=th-1 endif
  if ($count>1) then th=th+1 endif
  nll('pos',20):$count
until ($count=1)
$i=2
repeat
  getll($i-1):$ht,$freq
  dres($freq):$lw
  $totalwidth=$totalwidth+$lw
  z($freq+$cut[$i]*$multiplier,$freq-$cut[$i]*$multiplier)
  $i=$i+1
until ($i>2)

"Now focus on cutting the third peak, cut them"
sp=114p wp=3p
repeat
  nll('pos',20):$count
  if ($count<1) then th=th-1 endif
  if ($count>1) then th=th+1 endif
  nll('pos',20):$count
until ($count=1)
$i=3
repeat

```

```

    getll($i-2):$ht,$freq
    dres($freq):$lw
    $totalwidth=$totalwidth+$lw
    z($freq+$cut[$i]*$multiplier,$freq-$cut[$i]*$multiplier)
    $i=$i+1
until ($i>3)

```

"now focus on cutting peaks 4"

```

sp=65p wp=2p
repeat
    nll('pos',50):$count
    if ($count<1) then th=th-1 endif
    if ($count>1) then th=th+1 endif
    nll('pos',50):$count
until ($count=1)
$i=4
repeat
    getll($i-3):$ht,$freq
    dres($freq):$lw
    $totalwidth=$totalwidth+$lw
    z($freq+$cut[$i]*$multiplier,$freq-$cut[$i]*$multiplier)
    $i=$i+1
until ($i>4)

```

"Focus on cutting peaks 5 "

```

sp=48p wp=3p
repeat
    nll('pos',60):$count
    if ($count<1) then th=th-1 endif
    if ($count>1) then th=th+1 endif
    nll('pos',60):$count
until ($count=1)
$i=5
repeat
    getll($i-4):$ht,$freq
    dres($freq):$lw
    $totalwidth=$totalwidth+$lw
    z($freq+$cut[$i]*$multiplier,$freq-$cut[$i]*$multiplier)
    $i=$i+1
until ($i>5)

```

"Focus on cutting peaks 6 "

```

sp=39p wp=3p
repeat
    nll('pos',70):$count
    if ($count<1) then th=th-1 endif
    if ($count>1) then th=th+1 endif
    nll('pos',70):$count
until ($count=1)
$i=6
repeat
    getll($i-5):$ht,$freq
    dres($freq):$lw
    $totalwidth=$totalwidth+$lw
    z($freq+$cut[$i]*$multiplier,$freq-$cut[$i]*$multiplier)
    $i=$i+1

```

```

until ($i>6)

"Focus on cutting peaks 7 "
sp=31p wp=3p
repeat
  nll('pos',20):$count
  if ($count<1) then th=th-1 endif
  if ($count>1) then th=th+1 endif
  nll('pos',20):$count
until ($count=1)
$i=7
repeat
  getll($i-6):$ht,$freq
  dres($freq):$lw
  $totalwidth=$totalwidth+$lw
  z($freq+$cut[$i]*$multiplier,$freq-$cut[$i]*$multiplier)
  $i=$i+1
until ($i>7)

endif
"-----"

sp=$sp wp=$wp

echo("The average line width is ', $totalwidth/5)

"-----Output integrals-----"
"to turn off this section make the next line false, to turn it on make the line true"
if (2>1) then
  intmod='partial'
  f
  nll('pos',20):$count
  printon
  shell('date')
  text(file)
  echo("The average line width is ', $totalwidth/5)
  nli
  setint(5,1000)
  printoff('/home/singleton/dsingle/tempfile')
  shell('cat /home/singleton/dsingle/tempfile >> /home/singleton/dsingle/dastemp2')

endif
"-----"

$spectrum=$spectrum+1
until ($spectrum>$numspec)

sp=$sp wp=$wp

```

## Calculated Structures and Complete Energies

### Guide to Structures, Structure Titles and Their Organization

The calculated structures provided are divided into large groups by system, then divided

by method / basis set / solvent model.

The first section below provides structures associated with the rearrangement of **2** (using in all cases the numbering in the main text). Since the purpose of these calculations was to survey the diversity of predicted isotope effects versus transition structure geometry, most combinations of method / basis set / solvent model only involved the calculation of two structures, the lowest-energy starting cation **1** and the lowest-energy transition structure for the [2,3]-sigmatropic rearrangement. Exploratory calculations had identified a lowest-energy conformation for **1** that was the second conformation out of a series that were explored, and this conformation is designated “Conf2” in the structure titles. The complete structure titles for **1** are then labeled as “Cation-“ followed by the method, basis set, and solvent model, followed by “Conf2”. Exploratory calculations had identified the *exo s-cis* transition structure for the rearrangement as lowest in energy, and these transition structures are labeled as either “23TS-“ or just “TS-“ followed by the method, basis set, and solvent model.

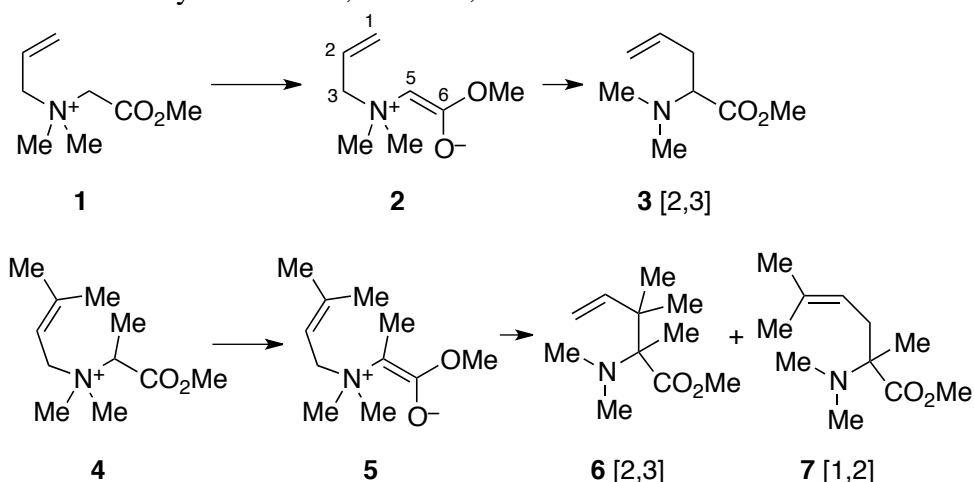

The second section below provides structures associated with the rearrangement of **5**. Many of these calculations were explored with the purpose of surveying the diversity of transition structure geometries for the 2,3-rearrangement, and so for many combinations of method / basis set / solvent model only a single structure was calculated, namely the *exo s-cis* transition structure. Exploratory calculations had indicated that the *exo s-cis* structure was lowest in energy, out of four possibilities (*endo* versus *exo*, *s-cis* versus *s-trans* (referring to the relative orientation of the carbonyl versus the C<sup>5</sup>-N bond)). In some cases we have provided the alternative possibilities; these are labeled in their title as *endo s-trans* or *endo s-cis* or *exo s-trans*. If a TS is not labeled, it is the *exo s-cis*. All of titles for 2,3-rearrangement structures start with “TS23”. The section also includes transition structures for the simple N-C<sup>3</sup> bond cleavage (with the prenyl fragment oriented in such a way that the 2,3-rearrangement cannot occur). Out of two logical conformations explored for the cleavage, the first was found to be lowest in energy and this is designated in the title as “TSCleavageA”. An alternative conformation is labeled “TSCleavageB”.

A final section presents structures used in relevant GAUSSRATE / POLYRATE calculations. These are slightly different in structure and energy from their counterparts in other sections, in part because of the use of `int(grid=ultrafine)` and `nosymm` options in their calculation, in part because they were often optimized with tight convergence, and in part because the starting materials and / or products were chosen from steepest-descent paths in mass-weighted coordinates. The names in this section are self-explanatory.

We have not included a large number of calculated structures, such as those associated with model systems **A** and **B**, or structures for most higher-energy conformers.

For the purpose of ease in record keeping and data retrieval, the listings here include a file name and complete path for the server on which the calculations are saved.

## Structures for the Rearrangement of 2

### Cation-B3LYP-D2/6-31+G\*\*/PCM- Conf2

/home/bibaswanbiswas/c8/23parentSM2B3D2PS

parent sm conf 2

B3LYP/6-31+G\*\*

E(RB3LYP) = -519.576987851

Zero-point correction= 0.240438 (Hartree/Particle)  
 Thermal correction to Energy= 0.253183  
 Thermal correction to Enthalpy= 0.254128  
 Thermal correction to Gibbs Free Energy= 0.201260  
 Sum of electronic and ZPE= -519.336549  
 Sum of electronic and thermal Energies= -519.323804  
 Sum of electronic and thermal Enthalpies= -519.322860  
 Sum of electronic and thermal Free Energies= -519.375728

| E             | CV        | S         |
|---------------|-----------|-----------|
| KCal/Mol      | Cal/Mol-K | Cal/Mol-K |
| Total 158.875 | 46.943    | 111.270   |

C,0,2.0118341603,-0.7967810691,-2.241639745  
 O,0,2.7688990345,0.4347315652,-2.4047463337  
 C,0,2.7842096205,0.9649270844,-3.623761134  
 O,0,2.2179839729,0.507229846,-4.5973435544  
 C,0,3.6294435895,2.2320931766,-3.5835941847  
 N,0,3.7213850288,2.9921952502,-4.8798104341  
 C,0,4.4357083946,2.179678611,-5.9306496582  
 C,0,4.530204375,4.2344162768,-4.6023149496  
 C,0,2.3411244626,3.4037716527,-5.4314834853  
 C,0,1.4724256821,4.0714262579,-4.4099085947  
 C,0,1.1908370164,5.376710319,-4.4452866791  
 H,0,2.1314987601,-1.064871835,-1.1931442059  
 H,0,0.9627734765,-0.6145700232,-2.4853120576  
 H,0,2.423854689,-1.5680492904,-2.8961962755  
 H,0,4.6482799399,1.9686235028,-3.289840571  
 H,0,3.2241543707,2.9079267871,-2.8280874685  
 H,0,3.8509578196,1.2848221256,-6.1326261033  
 H,0,4.5211255789,2.7957159768,-6.8264746725  
 H,0,5.4250562258,1.9254852247,-5.5480441456  
 H,0,5.5041312858,3.9309010763,-4.2174410393  
 H,0,4.6421611392,4.7778063685,-5.5404062559  
 H,0,3.9945626682,4.8402084404,-3.8721706699  
 H,0,2.5626219619,4.0691680792,-6.2680136907  
 H,0,1.8905905845,2.4830855693,-5.8007027733  
 H,0,1.0288377989,3.4380463022,-3.6450556813  
 H,0,1.6085075895,6.0240991344,-5.213362045  
 H,0,0.5258627739,5.8285215903,-3.7149065922

### 23TS-B3LYP-D2/6-31+G\*\*/PCM

/home/bibaswanbiswas/c8/23parentTSB3D2PS

parent ts exo s-cis

B3LYP/6-31+G\*\*

E(RB3LYP) = -519.067923267

Zero-point correction= 0.222213 (Hartree/Particle)  
 Thermal correction to Energy= 0.234910  
 Thermal correction to Enthalpy= 0.235854  
 Thermal correction to Gibbs Free Energy= 0.184094  
 Sum of electronic and ZPE= -518.845711  
 Sum of electronic and thermal Energies= -518.833013  
 Sum of electronic and thermal Enthalpies= -518.832069  
 Sum of electronic and thermal Free Energies= -518.883829

| E             | CV        | S         |
|---------------|-----------|-----------|
| KCal/Mol      | Cal/Mol-K | Cal/Mol-K |
| Total 147.408 | 47.022    | 108.938   |

C,0,1.9918091767,-0.809209825,-2.3262079805  
 O,0,2.725447739,0.419122139,-2.4545316512  
 C,0,2.8225841576,0.9292027439,-3.7284625127  
 C,0,3.481175396,2.1933223282,-3.7204134657  
 N,0,3.8311322247,2.8820187818,-4.864109122  
 C,0,4.6775828194,4.0572988169,-4.5778370444  
 O,0,2.354328585,0.3184629103,-4.7021199114  
 C,0,4.3223591519,2.1288628785,-6.0383123247  
 C,0,2.0976924831,3.8277104129,-5.7033721897  
 C,0,1.5097695154,4.2429428785,-4.4957034072  
 C,0,0.9963178156,3.312392053,-3.627683994  
 H,0,2.0137716856,-1.0524431442,-1.2624900804  
 H,0,0.9590383656,-0.6796055152,-2.6658170947  
 H,0,2.4641252859,-1.6064361108,-2.9089019046  
 H,0,3.7212115367,2.6526578882,-2.7730789992  
 H,0,5.3232805008,1.7345376947,-5.8233166193  
 H,0,3.6372009994,1.3116380315,-6.2519137224  
 H,0,4.3707213925,2.8165913473,-6.8857002618  
 H,0,5.6514695998,3.7284567406,-4.195295962  
 H,0,4.8134577094,4.6279430426,-5.4980852211  
 H,0,4.1768855947,4.6782371467,-3.8320132122  
 H,0,2.5606998315,4.5434295872,-6.3763950915  
 H,0,1.7799387547,2.8867732003,-6.1437161508  
 H,0,1.6990892512,5.2553373109,-4.1421096933  
 H,0,0.7332795716,2.3204068951,-3.9798192768  
 H,0,0.6998848563,3.577810767,-2.6166331063

### Cation-B3LYP-D2/6-31+G\*\*/SMD- Conf2

/home/bibaswanbiswas/c8/23parentSM2B3D2PSSMD

parent sm conf 2

B3LYP/6-31+G\*\*

E(RB3LYP) = -519.597337906

Zero-point correction= 0.241141 (Hartree/Particle)  
 Thermal correction to Energy= 0.253568  
 Thermal correction to Enthalpy= 0.254512  
 Thermal correction to Gibbs Free Energy= 0.202903



Sum of electronic and ZPE= -519.356197  
 Sum of electronic and thermal Energies= -519.343770  
 Sum of electronic and thermal Enthalpies= -519.342826  
 Sum of electronic and thermal Free Energies= -519.394435

E CV S  
 KCal/Mol Cal/Mol-K Cal/Mol-K  
 Total 159.116 46.484 108.621

C,0,1.9652299496,-0.7576776524,-2.2301376274  
 O,0,2.7191617294,0.4747767898,-2.3948841081  
 C,0,2.8081880972,0.9569858241,-3.634762971  
 O,0,2.2983312928,0.4497493669,-4.6157030489  
 C,0,3.6576127806,2.2177503173,-3.5983559547  
 N,0,3.7297355644,2.9908131533,-4.8864470241  
 C,0,4.4474421771,2.2057474241,-5.951866044  
 C,0,4.5298375254,4.2356031967,-4.6039714402  
 C,0,2.3457687206,3.391687441,-5.4221243067  
 C,0,1.4766812339,4.0450285002,-4.3908107459  
 C,0,1.1749635428,5.3455589845,-4.4282959901  
 H,0,2.0515002563,-1.0054594181,-1.171937447  
 H,0,0.9203917538,-0.5909066241,-2.5055106667  
 H,0,2.3995100144,-1.546029421,-2.8504296121  
 H,0,4.683192749,1.9452617936,-3.3329201203  
 H,0,3.2696726655,2.8899373705,-2.8308600722  
 H,0,3.869962493,1.3120132798,-6.1801973191  
 H,0,4.5306783026,2.8469743007,-6.8308821646  
 H,0,5.4357990982,1.9474808987,-5.5679446359  
 H,0,5.5113016024,3.929059611,-4.2379770436  
 H,0,4.6202002532,4.7884754083,-5.5399544939  
 H,0,4.002864993,4.8270577279,-3.8550190432  
 H,0,2.553891519,4.0644522258,-6.2563156763  
 H,0,1.8976397655,2.4706158629,-5.7952538462  
 H,0,1.0616602318,3.4064626139,-3.6128291174  
 H,0,1.5781291902,5.9943253357,-5.2042088787  
 H,0,0.509684498,5.7915736888,-3.6927236023

### 23TS-B3LYP-D2/6-31+G\*\*/SMD

/home/bibaswanbiswas/c8/23parentTSB3D2PSSMD  
 parent ts exo s-cis  
 B3LYP/6-31+G\*\*  
 E(RB3LYP) = -519.072558527

Zero-point correction= 0.222269 (Hartree/Particle)  
 Thermal correction to Energy= 0.234857  
 Thermal correction to Enthalpy= 0.235801  
 Thermal correction to Gibbs Free Energy= 0.184387  
 Sum of electronic and ZPE= -518.850290  
 Sum of electronic and thermal Energies= -518.837702  
 Sum of electronic and thermal Enthalpies= -518.836758  
 Sum of electronic and thermal Free Energies= -518.888172

E CV S  
 KCal/Mol Cal/Mol-K Cal/Mol-K  
 Total 147.375 46.897 108.210

C,0,2.0047006433,-0.8044424496,-2.3027812513  
 O,0,2.7223329922,0.4308067966,-2.4448726789  
 C,0,2.8250386391,0.9210915309,-3.7257297696  
 C,0,3.4698023078,2.195292889,-3.7248377997

N,0,3.8248851462,2.8827287127,-4.8658770729  
 C,0,4.6876410956,4.0461349009,-4.5814234795  
 O,0,2.3817504562,0.2863329757,-4.6933860752  
 C,0,4.2996464335,2.1313068673,-6.0464092197  
 C,0,2.1150828813,3.8617237312,-5.7001923815  
 C,0,1.5065625233,4.2444559579,-4.4914824762  
 C,0,0.980783541,3.2908918565,-3.6557957296  
 H,0,2.0155143257,-1.0288804528,-1.233567435  
 H,0,0.972228135,-0.6999567944,-2.6542847811  
 H,0,2.493764266,-1.6105009566,-2.8605698226  
 H,0,3.6950459969,2.6663354068,-2.7791447584  
 H,0,5.2868150687,1.702905752,-5.8302246142  
 H,0,3.5931649333,1.3375478348,-6.2791417453  
 H,0,4.3764138849,2.8303024677,-6.882679289  
 H,0,5.6617348028,3.7025672889,-4.2109068464  
 H,0,4.8213962455,4.6190800748,-5.5009685801  
 H,0,4.2048760121,4.6703042568,-3.8259319766  
 H,0,2.596238814,4.5964911963,-6.3398643345  
 H,0,1.7928345587,2.9419085709,-6.181218657  
 H,0,1.6976132136,5.2446907347,-4.10411041342  
 H,0,0.7223176116,2.3072313445,-4.0358289341  
 H,0,0.666069472,3.5311105068,-2.6427801572

### Cation-B3LYP-D2/6-31G\*/PCM- Conf2

/home/bibaswanbiswas/c8/23parentSM2B3D2SB  
 parent sm conf 2  
 B3LYP/6-31G\*  
 E(RB3LYP) = -519.541373957

Zero-point correction= 0.241730 (Hartree/Particle)  
 Thermal correction to Energy= 0.254499  
 Thermal correction to Enthalpy= 0.255443  
 Thermal correction to Gibbs Free Energy= 0.202324  
 Sum of electronic and ZPE= -519.299644  
 Sum of electronic and thermal Energies= -519.286875  
 Sum of electronic and thermal Enthalpies= -519.285931  
 Sum of electronic and thermal Free Energies= -519.339050

E CV S  
 KCal/Mol Cal/Mol-K Cal/Mol-K  
 Total 159.700 46.763 111.799

C,0,2.0243629283,-0.7919080244,-2.2532833654  
 O,0,2.7865949024,0.4330936219,-2.4083864972  
 C,0,2.7742877251,0.9772892654,-3.6200782967  
 O,0,2.1850063012,0.5363730471,-4.5857022996  
 C,0,3.6207421924,2.2452729313,-3.5782449206  
 N,0,3.718982322,2.9936657208,-4.8805131823  
 C,0,4.4358884884,2.1676470057,-5.9167961407  
 C,0,4.5225235898,4.2396631444,-4.61375006  
 C,0,2.3385479335,3.3982601218,-5.4408425062  
 C,0,1.4630752774,4.0570420179,-4.4204755028  
 C,0,1.2142232602,5.3679051105,-4.4239187567  
 H,0,2.1579475357,-1.080101455,-1.2111692032  
 H,0,0.9719319468,-0.6007525211,-2.4773958608  
 H,0,2.41699461,-1.5573123315,-2.9273357987  
 H,0,4.638639665,1.9888257822,-3.2746497115  
 H,0,3.2069849686,2.9282178087,-2.8331775015  
 H,0,3.8570524605,1.2632673551,-6.0940689131  
 H,0,4.5109777888,2.7649224879,-6.8268371347

H,0,5.4299225686,1.9305180136,-5.533676887  
 H,0,5.4903541367,3.9443468,-4.2061510355  
 H,0,4.6502481141,4.7657823415,-5.5604773496  
 H,0,3.9721276092,4.8580055828,-3.9044522122  
 H,0,2.5634055344,4.066681194,-6.274408239  
 H,0,1.8980254641,2.4744889463,-5.813547338  
 H,0,0.9947672537,3.4102274423,-3.6818089634  
 H,0,1.6569712279,6.0269948416,-5.1680718871  
 H,0,0.5484461949,5.818901749,-3.6931034369

### 23TS-B3LYP-D2/6-31G\*/PCM

/home/bibaswanbiswas/c8/23parentTSB3D2SB

parent ts exo s-cis

B3LYP/6-31G\*

E(RB3LYP) = -519.022559562

Zero-point correction= 0.223787 (Hartree/Particle)  
 Thermal correction to Energy= 0.236342  
 Thermal correction to Enthalpy= 0.237286  
 Thermal correction to Gibbs Free Energy= 0.185854  
 Sum of electronic and ZPE= -518.798772  
 Sum of electronic and thermal Energies= -518.786218  
 Sum of electronic and thermal Enthalpies= -518.785274  
 Sum of electronic and thermal Free Energies= -518.836705

| E             | CV        | S         |
|---------------|-----------|-----------|
| KCal/Mol      | Cal/Mol-K | Cal/Mol-K |
| Total 148.307 | 46.624    | 108.247   |

C,0,1.9843757471,-0.8034079907,-2.3643243653  
 O,0,2.7307391171,0.4134089273,-2.4657521081  
 C,0,2.8096974076,0.945246613,-3.7311581953  
 C,0,3.4878519713,2.1975602465,-3.7105020712  
 N,0,3.8269269367,2.8868606111,-4.8594447179  
 C,0,4.6584119928,4.071458751,-4.5795224612  
 O,0,2.3066530007,0.3685880326,-4.704942114  
 C,0,4.3365020156,2.1240427835,-6.0182498556  
 C,0,2.1024227713,3.7817537401,-5.6952845874  
 C,0,1.5169264324,4.2362596519,-4.5009781803  
 C,0,1.0291738374,3.3279082169,-3.598679955  
 H,0,2.0220684802,-1.0861628422,-1.309787578  
 H,0,0.9452793347,-0.653842764,-2.6791114033  
 H,0,2.4289344341,-1.5900157111,-2.9839381066  
 H,0,3.7631122529,2.6400654658,-2.7647416184  
 H,0,5.3544193251,1.7739007678,-5.804666378  
 H,0,3.6774184051,1.2768582475,-6.1968671913  
 H,0,4.3490289584,2.7888828793,-6.8861763019  
 H,0,5.6300244127,3.7579773144,-4.17777547  
 H,0,4.8017611419,4.6309970071,-5.5063798537  
 H,0,4.1387078033,4.696721384,-3.8496608805  
 H,0,2.5380164213,4.4775663103,-6.407621438  
 H,0,1.7833959454,2.8241047057,-6.0983269923  
 H,0,1.6995427905,5.2628150226,-4.1851439828  
 H,0,0.7583996453,2.3280805473,-3.9213617993  
 H,0,0.7344634195,3.6198330823,-2.5936423947

### Cation- B97D3/6-31G\*/PCM- Conf2

/home/bibaswanbiswas/c8/23parentSM2B97D3SB

parent sm conf 2

B97D3/6-31G\*  
 E(RB97D3) = -519.191750743

Zero-point correction= 0.236901 (Hartree/Particle)  
 Thermal correction to Energy= 0.250194  
 Thermal correction to Enthalpy= 0.251138  
 Thermal correction to Gibbs Free Energy= 0.195480  
 Sum of electronic and ZPE= -518.954849  
 Sum of electronic and thermal Energies= -518.941557  
 Sum of electronic and thermal Enthalpies= -518.940613  
 Sum of electronic and thermal Free Energies= -518.996271

| E             | CV        | S         |
|---------------|-----------|-----------|
| KCal/Mol      | Cal/Mol-K | Cal/Mol-K |
| Total 156.999 | 48.119    | 117.141   |

C,0,2.0042759519,-0.7911685801,-2.2412586973  
 O,0,2.7740178964,0.4378099713,-2.3982410602  
 C,0,2.7776478474,0.9709418054,-3.6257601666  
 O,0,2.1969883869,0.519494911,-4.5995173743  
 C,0,3.633958441,2.2378787468,-3.5811881665  
 N,0,3.7312430636,2.9955367457,-4.8858949575  
 C,0,4.4478815717,2.1697209954,-5.9320615865  
 C,0,4.5347943146,4.2478514305,-4.6144459299  
 C,0,2.3354667853,3.4004931123,-5.441423949  
 C,0,1.4565518808,4.0521133877,-4.4197235059  
 C,0,1.1987194767,5.3684893689,-4.4123603823  
 H,0,2.1290581285,-1.0672984918,-1.1920547565  
 H,0,0.9513580469,-0.6005242497,-2.4759353852  
 H,0,2.4049419549,-1.566458843,-2.9033720178  
 H,0,4.6542875579,1.9739709335,-3.2818270149  
 H,0,3.2310555842,2.9233363011,-2.8286549375  
 H,0,3.8771923192,1.2557677551,-6.1005990344  
 H,0,4.507796255,2.7626858602,-6.8487273253  
 H,0,5.4512428216,1.9422317603,-5.5610986783  
 H,0,5.5055058746,3.9558770083,-4.2051888711  
 H,0,4.6652568706,4.7807589795,-5.5596903036  
 H,0,3.9842397167,4.8663513133,-3.9018265372  
 H,0,2.5557241328,4.0695503358,-6.2791618221  
 H,0,1.8999666847,2.4710823837,-5.8151320446  
 H,0,0.9752558793,3.3969564072,-3.6909505946  
 H,0,1.6440167083,6.0445183113,-5.1447170516  
 H,0,0.5205878483,5.8093503401,-3.6815108497

### 23TS-B97D3/6-31G\*/PCM

/home/bibaswanbiswas/c8/23parentTSB97D3SB

parent ts exo s-cis

B97D3/6-31G\*

E(RB97D3) = -518.682459365

Zero-point correction= 0.219801 (Hartree/Particle)  
 Thermal correction to Energy= 0.232694  
 Thermal correction to Enthalpy= 0.233638  
 Thermal correction to Gibbs Free Energy= 0.181304  
 Sum of electronic and ZPE= -518.462658  
 Sum of electronic and thermal Energies= -518.449766  
 Sum of electronic and thermal Enthalpies= -518.448821  
 Sum of electronic and thermal Free Energies= -518.501156

| E | CV | S |
|---|----|---|
|---|----|---|

KCal/Mol Cal/Mol-K Cal/Mol-K  
Total 146.018 47.627 110.147

C,0,1.9722204471,-0.8322814371,-2.4121711006  
O,0,2.7705079801,0.357220501,-2.4877427541  
C,0,2.8539075202,0.9258429356,-3.7589447894  
C,0,3.5996165478,2.1303188479,-3.7198191189  
N,0,3.8194815775,2.8955481491,-4.8789616287  
C,0,4.6408325521,4.0983482248,-4.5813615223  
O,0,2.3103217465,0.3842120786,-4.7439941134  
C,0,4.3781528455,2.1483239159,-6.0427935664  
C,0,2.1687044161,3.6346017954,-5.6164317138  
C,0,1.5209910736,4.2356721414,-4.4871209724  
C,0,0.9217624491,3.4722984756,-3.531015571  
H,0,2.0179892921,-1.1498693168,-1.3642987778  
H,0,0.9286933003,-0.6333096339,-2.6972962359  
H,0,2.3685221455,-1.6249658855,-3.0626226966  
H,0,3.8254037636,2.606513305,-2.7733437701  
H,0,5.4083782138,1.8496519685,-5.8088559396  
H,0,3.7568915622,1.2665967564,-6.2083882364  
H,0,4.3673981207,2.8020214128,-6.9223693936  
H,0,5.6251037691,3.7820886839,-4.212113127  
H,0,4.7543243993,4.6904572714,-5.4947273812  
H,0,4.1292969331,4.6895598214,-3.8155947259  
H,0,2.539553277,4.2778096085,-6.4165611057  
H,0,1.786204829,2.6691221013,-5.9495841057  
H,0,1.6803160319,5.3020213369,-4.3053690641  
H,0,0.7182292755,2.416476807,-3.7030422702  
H,0,0.5514499315,3.9031811348,-2.5995163189

### Cation- N12/6-31+G\*\*/PCM- Conf2

/home/bibaswanbiswas/c8/SM2N12PS  
parent sm conf 2  
N12/6-31+G\*\*  
E(RN12) = -519.407692482

Zero-point correction= 0.239843 (Hartree/Particle)  
Thermal correction to Energy= 0.252803  
Thermal correction to Enthalpy= 0.253747  
Thermal correction to Gibbs Free Energy= 0.200521  
Sum of electronic and ZPE= -519.167849  
Sum of electronic and thermal Energies= -519.154890  
Sum of electronic and thermal Enthalpies= -519.153946  
Sum of electronic and thermal Free Energies= -519.207171

E CV S  
KCal/Mol Cal/Mol-K Cal/Mol-K  
Total 158.636 47.526 112.022

C,0,2.0714897046,-0.8407639046,-2.278635364  
O,0,2.8061443038,0.3809669936,-2.4360077855  
C,0,2.7841441775,0.9515683637,-3.6250072628  
O,0,2.197845739,0.5217250676,-4.5931266227  
C,0,3.6083228695,2.2214214517,-3.5681294851  
N,0,3.7084720776,2.9884326525,-4.8476454746  
C,0,4.4013331225,2.1769631405,-5.8962885868  
C,0,4.5250163173,4.2090616707,-4.5669291908  
C,0,2.3370813691,3.4134397705,-5.3862965157  
C,0,1.5015609048,4.1598724426,-4.4087141007  
C,0,1.1836219568,5.4466550772,-4.5541788526

H,0,2.2858131899,-1.1787829447,-1.2736502  
H,0,1.0102003001,-0.6483610188,-2.4000719657  
H,0,2.403662779,-1.5701009203,-3.0099766184  
H,0,4.6183901086,1.9680291858,-3.258710985  
H,0,3.1948740705,2.8808673488,-2.8112371498  
H,0,3.8087995797,1.2968792137,-6.1038119037  
H,0,4.5006994773,2.7852703672,-6.7869276516  
H,0,5.3813899821,1.900894284,-5.525776302  
H,0,5.4887801052,3.9049370402,-4.1774055223  
H,0,4.6539570844,4.755006705,-5.4932924566  
H,0,4.0018602117,4.8228192993,-3.8447370689  
H,0,2.5533508306,4.0133724244,-6.2638879686  
H,0,1.8569245547,2.490595542,-5.6933491202  
H,0,1.0795916867,3.5989804781,-3.5854786464  
H,0,1.560506309,6.0374948172,-5.3774838229  
H,0,0.5251991879,5.940073452,-3.8555663769

### 23TS-N12/6-31+G\*\*/PCM

/home/bibaswanbiswas/c8/TSpentN12PS  
parent ts exo s-cis  
N12/6-31+G\*\*  
E(RN12) = -518.906645363

Zero-point correction= 0.222212 (Hartree/Particle)  
Thermal correction to Energy= 0.235111  
Thermal correction to Enthalpy= 0.236056  
Thermal correction to Gibbs Free Energy= 0.183660  
Sum of electronic and ZPE= -518.684434  
Sum of electronic and thermal Energies= -518.671534  
Sum of electronic and thermal Enthalpies= -518.670590  
Sum of electronic and thermal Free Energies= -518.722986

E CV S  
KCal/Mol Cal/Mol-K Cal/Mol-K  
Total 147.535 47.424 110.277

C,0,2.0564008038,-0.8340301518,-2.3495362104  
O,0,2.7287859217,0.4062835961,-2.4739485019  
C,0,2.8263414038,0.9218125193,-3.7355218924  
C,0,3.4729672503,2.181442418,-3.7220999019  
N,0,3.8072613303,2.8830164302,-4.8602357181  
C,0,4.677762835,4.026476963,-4.5687300017  
O,0,2.3752374237,0.3057777503,-4.7075628004  
C,0,4.2881451469,2.1203505386,-6.0194213949  
C,0,2.1462231716,3.8139069453,-5.6733577565  
C,0,1.5140854742,4.2812450804,-4.5061997931  
C,0,0.9207867272,3.4148730948,-3.6379747183  
H,0,2.0712070404,-1.0756361934,-1.2925712064  
H,0,1.0281920944,-0.7604798853,-2.6973355961  
H,0,2.5630659969,-1.6139310063,-2.9142890342  
H,0,3.6975392974,2.6442133067,-2.779456683  
H,0,5.2852642597,1.7358334363,-5.8092057777  
H,0,3.6128424516,1.2960694277,-6.2054322792  
H,0,4.3298500079,2.778161461,-6.8810952093  
H,0,5.6385700062,3.6730395143,-4.1978580289  
H,0,4.827826628,4.6044523189,-5.4731464904  
H,0,4.2087779928,4.6498873853,-3.8157224017  
H,0,2.5974444757,4.5107521758,-6.3650518242  
H,0,1.7951344597,2.8900081198,-6.1098752419  
H,0,1.6945670388,5.3017385352,-4.1919454324

H,0,0.6748726773,2.4089171092,-3.9410302632  
H,0,0.5751020847,3.7332801107,-2.6654358417

### 23TS-UN12/6-31+G\*\*/PCM

/home/bibaswanbiswas/c8/TSparentUN12PS

parent ts exo s-cis

UN12/6-31+G\*\*

E(UN12) = -518.906645392

Zero-point correction= 0.222211 (Hartree/Particle)  
Thermal correction to Energy= 0.235110  
Thermal correction to Enthalpy= 0.236054  
Thermal correction to Gibbs Free Energy= 0.183663  
Sum of electronic and ZPE= -518.684434  
Sum of electronic and thermal Energies= -518.671535  
Sum of electronic and thermal Enthalpies= -518.670591  
Sum of electronic and thermal Free Energies= -518.722982

| E             | CV        | S         |
|---------------|-----------|-----------|
| KCal/Mol      | Cal/Mol-K | Cal/Mol-K |
| Total 147.534 | 47.424    | 110.266   |

C,0,2.0562314234,-0.8341384674,-2.3498227891  
O,0,2.7286613326,0.4061597084,-2.4741656537  
C,0,2.8263266439,0.9217465195,-3.7356962028  
C,0,3.4729797542,2.1813736915,-3.7221539334  
N,0,3.8073909481,2.8829435016,-4.8602371409  
C,0,4.6775922754,4.0266049027,-4.5686980878  
O,0,2.3752718239,0.3058070456,-4.7078170781  
C,0,4.288440442,2.1203760863,-6.0194046535  
C,0,2.1459508533,3.8135091356,-5.6734184022  
C,0,1.5141907307,4.2812295883,-4.5062240298  
C,0,0.9210695462,3.4152829918,-3.6374100435  
H,0,2.0707044697,-1.0756102683,-1.2928223807  
H,0,1.0281333471,-0.7606277306,-2.6979488943  
H,0,2.563079461,-1.6141210139,-2.9142986382  
H,0,3.6974605392,2.6441013723,-2.7794656866  
H,0,5.2856799214,1.7361397345,-5.8092301366  
H,0,3.6133543312,1.2959067796,-6.2053758607  
H,0,4.3299274535,2.7781636975,-6.8811061874  
H,0,5.6383788873,3.6734245838,-4.1975216571  
H,0,4.8277681153,4.6044599978,-5.4731742116  
H,0,4.2082992147,4.6500536269,-3.8159120456  
H,0,2.5969682721,4.5101282547,-6.3654700719  
H,0,1.795007477,2.8892884731,-6.1093693893  
H,0,1.6946548337,5.3018860171,-4.1924755237  
H,0,0.67512946,2.4091485921,-3.9398543473  
H,0,0.5756024434,3.7342241793,-2.6649669541

### Cation- M06/6-31+G\*\*/PCM- Conf2

/home/bibaswanbiswas/c8/23SMcatUm06pcmdmf

M06/6-31+G\*\*

E(RM06) = -519.181390021

Zero-point correction= 0.239598 (Hartree/Particle)  
Thermal correction to Energy= 0.252131  
Thermal correction to Enthalpy= 0.253075  
Thermal correction to Gibbs Free Energy= 0.201601  
Sum of electronic and ZPE= -518.941792

Sum of electronic and thermal Energies= -518.929259  
Sum of electronic and thermal Enthalpies= -518.928315  
Sum of electronic and thermal Free Energies= -518.979789

| E             | CV        | S         |
|---------------|-----------|-----------|
| KCal/Mol      | Cal/Mol-K | Cal/Mol-K |
| Total 158.215 | 47.047    | 108.338   |

C,0,1.8449022255,-0.6202354751,-2.2587965391  
O,0,2.653549298,0.5596326055,-2.4164482523  
C,0,2.857624907,0.9670456834,-3.6584316879  
O,0,2.4207786733,0.4291083116,-4.6513663997  
C,0,3.7298770733,2.2021951378,-3.6229354871  
N,0,3.7738587923,2.9876199218,-4.8983089406  
C,0,4.4871082033,2.2251543877,-5.9774959624  
C,0,4.554317142,4.2395541458,-4.6232107253  
C,0,1.4967903942,3.9349821651,-4.347557834  
C,0,0.3973762362,3.3146767553,-3.9191606785  
C,0,2.371657725,3.352501454,-5.4033239894  
H,0,1.7950352201,-0.8002957435,-1.1866052159  
H,0,0.8466544672,-0.4403973485,-2.6656713981  
H,0,2.3095351457,-1.4658326142,-2.7706623205  
H,0,4.7567850783,1.9060896296,-3.3796511894  
H,0,5.5049191822,2.0197199265,-5.6399798894  
H,0,3.9496886874,1.2975544823,-6.1692918168  
H,0,4.5101386922,2.8487580723,-6.8731071551  
H,0,5.5521526301,3.9593235055,-4.2798093552  
H,0,4.6257713577,4.8119159739,-5.5496004358  
H,0,4.0510064231,4.826123165,-3.8540617691  
H,0,2.5491791786,4.0508354476,-6.2288188021  
H,0,1.9436244956,2.4320776298,-5.8065152052  
H,0,1.7534193863,4.9189327707,-3.9546863359  
H,0,0.1014380287,2.3414406104,-4.31048681  
H,0,-0.2530567785,3.7660907643,-3.1754353262  
H,0,3.3787311354,2.8610796355,-2.823552479

### 23TS- UM06/6-31+G\*\*/PCM

/home/bibaswanbiswas/c8/Parentcalcs/23TSUm06pcmdmf  
experimental system pcm m06 +G\*\*

UM06/6-31+G\*\*

E(UM06) = -518.672218948

Zero-point correction= 0.221418 (Hartree/Particle)  
Thermal correction to Energy= 0.234072  
Thermal correction to Enthalpy= 0.235017  
Thermal correction to Gibbs Free Energy= 0.183563  
Sum of electronic and ZPE= -518.450801  
Sum of electronic and thermal Energies= -518.438147  
Sum of electronic and thermal Enthalpies= -518.437202  
Sum of electronic and thermal Free Energies= -518.488656

| E             | CV        | S         |
|---------------|-----------|-----------|
| KCal/Mol      | Cal/Mol-K | Cal/Mol-K |
| Total 146.883 | 47.194    | 108.292   |

C,0,1.970228096,-0.746171725,-2.320652426  
O,0,2.7138886572,0.4578462826,-2.4575862697  
C,0,2.8455666321,0.9308357404,-3.7323189364  
C,0,3.4750871328,2.2082126603,-3.7315061733  
N,0,3.8255321724,2.8921291851,-4.8748804425

C,0,4.6848178613,4.0477189436,-4.5897630335  
 O,0,2.422951473,0.289275982,-4.6973658933  
 C,0,4.3125034756,2.1383997425,-6.0399849742  
 C,0,2.0899516843,3.8451866391,-5.6893655938  
 C,0,1.5027604756,4.2015719264,-4.4714539513  
 C,0,1.0274548926,3.2271183222,-3.6348624496  
 H,0,1.9503834857,-0.968129213,-1.2527113365  
 H,0,0.9480044431,-0.6177236985,-2.6934686426  
 H,0,2.4440512586,-1.5707451583,-2.8626157051  
 H,0,3.7147174459,2.6699841627,-2.7806019011  
 H,0,5.3173399979,1.7474151076,-5.8312025334  
 H,0,3.6363019858,1.3112599221,-6.2516785084  
 H,0,4.3589887852,2.8154107868,-6.8981176418  
 H,0,5.6588210654,3.7065763073,-4.2148460994  
 H,0,4.8306540664,4.6278022282,-5.5045978175  
 H,0,4.2073777777,4.678309554,-3.8347120819  
 H,0,2.5283754223,4.5944440246,-6.346482319  
 H,0,1.7864105014,2.9145992827,-6.1679192638  
 H,0,1.6720213918,5.2058035996,-4.0797160053  
 H,0,0.755815771,2.2487220285,-4.0258098728  
 H,0,0.7342480491,3.4416083664,-2.6098201275

**23TS- UM06/6-31+G\*\*/PCM(water)**

/home/bibaswanbiswas/c8/Parentcalcs/23TSUM06pcmwater  
 E(UM06) = -518.672476705

Zero-point correction= 0.221405 (Hartree/Particle)  
 Thermal correction to Energy= 0.234061  
 Thermal correction to Enthalpy= 0.235005  
 Thermal correction to Gibbs Free Energy= 0.183546  
 Sum of electronic and ZPE= -518.451072  
 Sum of electronic and thermal Energies= -518.438415  
 Sum of electronic and thermal Enthalpies= -518.437471  
 Sum of electronic and thermal Free Energies= -518.488931

|               |           |           |
|---------------|-----------|-----------|
| E             | CV        | S         |
| KCal/Mol      | Cal/Mol-K | Cal/Mol-K |
| Total 146.876 | 47.199    | 108.306   |

C,0,1.9695982163,-0.7456296158,-2.3200625243  
 O,0,2.7138787945,0.458026488,-2.4576400498  
 C,0,2.8456119394,0.9308025184,-3.7324546517  
 C,0,3.4748567005,2.2082544201,-3.7319115827  
 N,0,3.8260580792,2.8919919096,-4.875004415  
 C,0,4.6850540651,4.047828855,-4.589717002  
 O,0,2.4232401792,0.2886829825,-4.6974095327  
 C,0,4.3129521465,2.1386576628,-6.0403414965  
 C,0,2.0888615652,3.8458551643,-5.6898126723  
 C,0,1.5026418738,4.2009711333,-4.4712638065  
 C,0,1.0280720924,3.2257012984,-3.6349517392  
 H,0,1.9492396739,-0.9667984534,-1.2519863915  
 H,0,0.9475357382,-0.6169374533,-2.6932184318  
 H,0,2.4433635847,-1.5708502445,-2.8610861372  
 H,0,3.7145771741,2.6699108704,-2.7809550357  
 H,0,5.3176407955,1.7472479549,-5.8316257564  
 H,0,3.6365150123,1.3119332834,-6.2527967969  
 H,0,4.3599499113,2.816046309,-6.8981076807  
 H,0,5.6592330041,3.706879193,-4.2151066235  
 H,0,4.8305212448,4.6281405267,-5.5044306738

H,0,4.2075693702,4.6781270889,-3.8344759477  
 H,0,2.5275237628,4.5954535382,-6.3463272911  
 H,0,1.7862144645,2.9151140826,-6.1686400452  
 H,0,1.672315304,5.2048026211,-4.0786978187  
 H,0,0.7556070662,2.2477520294,-4.0264786104  
 H,0,0.7356222414,3.4394968371,-2.6095372863

**Cation- M052X/6-31+G\*\*/PCM**

/home/bibaswanbiswas/c8/Parentcalcs/m052x/m052xsm  
 sean allyl ester starting material for m05 isotope effects  
 M052X/6-31+G\*\*  
 E(RM052X) = -519.458425931

Zero-point correction= 0.244429 (Hartree/Particle)  
 Thermal correction to Energy= 0.257198  
 Thermal correction to Enthalpy= 0.258142  
 Thermal correction to Gibbs Free Energy= 0.205418  
 Sum of electronic and ZPE= -519.213997  
 Sum of electronic and thermal Energies= -519.201228  
 Sum of electronic and thermal Enthalpies= -519.200284  
 Sum of electronic and thermal Free Energies= -519.253008

|               |           |           |
|---------------|-----------|-----------|
| E             | CV        | S         |
| KCal/Mol      | Cal/Mol-K | Cal/Mol-K |
| Total 161.394 | 46.517    | 110.968   |

C,0,1.8753927368,-0.653356482,-2.262116733  
 O,0,2.6767889894,0.5449787039,-2.4048214272  
 C,0,2.8302734595,0.9920222651,-3.6396703478  
 O,0,2.3491328009,0.4808431155,-4.6262806566  
 C,0,3.7148547103,2.2236890973,-3.6109402379  
 N,0,3.7695804993,2.9878272364,-4.8947924428  
 C,0,4.4782688998,2.2046598567,-5.9610553401  
 C,0,4.5598708111,4.2352989127,-4.6289714907  
 C,0,1.499947069,3.9470141828,-4.3501513435  
 C,0,0.3904728638,3.3291856057,-3.9460576201  
 C,0,2.3824597572,3.3621705081,-5.4110058485  
 H,0,1.8880661532,-0.8770341196,-1.2017770858  
 H,0,0.8643990353,-0.452480746,-2.6082148757  
 H,0,2.3222353929,-1.458958433,-2.8393002029  
 H,0,4.7316239643,1.9170587925,-3.3622916506  
 H,0,5.4904488518,2.0014301033,-5.6199114776  
 H,0,3.9338930029,1.2829623267,-6.1351936011  
 H,0,4.5007743534,2.8155189657,-6.8601434295  
 H,0,5.5430234999,3.9479595132,-4.2642886778  
 H,0,4.6503681149,4.7843921539,-5.5622165124  
 H,0,4.0450051088,4.8336595975,-3.8832143747  
 H,0,2.5659723758,4.0694651792,-6.2202136068  
 H,0,1.9492889221,2.4527716061,-5.8173098904  
 H,0,1.7575595144,4.9201196944,-3.9459236071  
 H,0,0.0994333919,2.3664758427,-4.3527727895  
 H,0,-0.2611987378,3.7786427279,-3.2077648691  
 H,0,3.3549274594,2.8893347933,-2.828571861

**23TS- M052X/6-31+G\*\*/PCM**

/home/bibaswanbiswas/c8/Parentcalcs/m052x/m052xts  
 sean allyl ester trying to kill m052x  
 M052X/6-31+G\*\*  
 E(RM052X) = -518.943406641

Zero-point correction= 0.227481 (Hartree/Particle)  
 Thermal correction to Energy= 0.239713  
 Thermal correction to Enthalpy= 0.240657  
 Thermal correction to Gibbs Free Energy= 0.189859  
 Sum of electronic and ZPE= -518.715925  
 Sum of electronic and thermal Energies= -518.703694  
 Sum of electronic and thermal Enthalpies= -518.702749  
 Sum of electronic and thermal Free Energies= -518.753548

E CV S  
 KCal/Mol Cal/Mol-K Cal/Mol-K  
 Total 150.422 45.488 106.914

C,0,2.0214222998,-0.801470997,-2.3436663695  
 O,0,2.6920040321,0.4592246856,-2.4613388313  
 C,0,2.7699657924,0.9663735427,-3.7242952189  
 C,0,3.3442741961,2.2701939876,-3.7241876718  
 N,0,3.7411570132,2.9195768418,-4.8868343303  
 C,0,4.6309569671,4.0525916432,-4.5786546222  
 O,0,2.3202534765,0.3379528755,-4.6871908685  
 C,0,4.2760879426,2.1201346678,-6.0058787783  
 C,0,2.1512261715,3.8242141753,-5.6936255173  
 C,0,1.5332829504,4.2552068717,-4.5079695332  
 C,0,1.1363014059,3.2610890069,-3.6419244858  
 H,0,2.0412077778,-1.0429547931,-1.2849102024  
 H,0,0.9936515017,-0.7206055204,-2.6955861613  
 H,0,2.5426923356,-1.5662803349,-2.9173733919  
 H,0,3.6824212148,2.6797841947,-2.7863429004  
 H,0,5.2570505295,1.7243886643,-5.7348663684  
 H,0,3.5946863008,1.3061616519,-6.2243960353  
 H,0,4.371574235,2.7754799723,-6.8710644165  
 H,0,5.5631239473,3.6804056233,-4.1484891814  
 H,0,4.8385835963,4.6010428524,-5.4953510396  
 H,0,4.1321954646,4.7057433756,-3.864886474  
 H,0,2.593910139,4.5369841137,-6.3821675512  
 H,0,1.7929387797,2.9053817144,-6.1481182601  
 H,0,1.7310244274,5.2547601481,-4.1349016844  
 H,0,0.7878394384,2.3144676581,-4.0377774451  
 H,0,0.8744220644,3.4776153786,-2.6122436608

### Cation M062X/6-31+G\*\*/PCM Conf1

/home/bibaswanbiswas/c8/Parentcalcs/23parentSM1m062x  
 SSpcm  
 try at new ts's with small basis  
 m062X/6-31+G\*\*  
 E(RM062X) = -519.293599561

Zero-point correction= 0.242639 (Hartree/Particle)  
 Thermal correction to Energy= 0.255413  
 Thermal correction to Enthalpy= 0.256357  
 Thermal correction to Gibbs Free Energy= 0.203557  
 Sum of electronic and ZPE= -519.050961  
 Sum of electronic and thermal Energies= -519.038186  
 Sum of electronic and thermal Enthalpies= -519.037242  
 Sum of electronic and thermal Free Energies= -519.090042

E CV S  
 KCal/Mol Cal/Mol-K Cal/Mol-K  
 Total 160.274 46.678 111.128

C,0,1.849223013,-0.6188169651,-2.2621308349  
 O,0,2.6606202547,0.5626727661,-2.4077677231  
 C,0,2.8234429286,1.0062399898,-3.6431787688  
 O,0,2.3379450616,0.5038532678,-4.6307662106  
 C,0,3.728264934,2.2252443523,-3.6144898326  
 N,0,3.7798387297,2.9935116574,-4.8997112637  
 C,0,4.4832181769,2.2061944663,-5.9685684755  
 C,0,4.5685749377,4.2446351055,-4.6367230942  
 C,0,1.4976765687,3.9134462822,-4.3335105962  
 C,0,0.4007832547,3.2710286601,-3.9320590757  
 C,0,2.3855731262,3.3664405391,-5.4092690223  
 H,0,1.8434744057,-0.8343517523,-1.1970046035  
 H,0,0.8402812973,-0.4164012566,-2.6237104802  
 H,0,2.2917964463,-1.4420646717,-2.8240002122  
 H,0,4.745515658,1.9040693351,-3.3753778555  
 H,0,5.5018987492,2.0079858558,-5.6358763057  
 H,0,3.9401671153,1.2783279732,-6.1324475844  
 H,0,4.495741449,2.810415033,-6.8754548565  
 H,0,5.551809646,3.9627077119,-4.2606424563  
 H,0,4.666990662,4.7897545742,-5.5743289395  
 H,0,4.0459267708,4.8505843838,-3.8983638166  
 H,0,2.5623699749,4.0959254757,-6.2038299793  
 H,0,1.963114415,2.4603281426,-5.8410394482  
 H,0,1.7473061035,4.8825532228,-3.9069911153  
 H,0,0.1178975948,2.3101716648,-4.3563570069  
 H,0,-0.252243492,3.6958757141,-3.1770532778  
 H,0,3.3856552185,2.8953194721,-2.8243191645

### Cation- M062X/6-31+G\*\*/PCM-Conf2

/home/bibaswanbiswas/c8/Parentcalcs/23parentSM2M062  
 XSS  
 parent sm  
 M062X/6-31+G\*\*  
 E(RM062X) = -519.292775633

Zero-point correction= 0.243092 (Hartree/Particle)  
 Thermal correction to Energy= 0.255685  
 Thermal correction to Enthalpy= 0.256630  
 Thermal correction to Gibbs Free Energy= 0.204183  
 Sum of electronic and ZPE= -519.049683  
 Sum of electronic and thermal Energies= -519.037090  
 Sum of electronic and thermal Enthalpies= -519.036146  
 Sum of electronic and thermal Free Energies= -519.088593

E CV S  
 KCal/Mol Cal/Mol-K Cal/Mol-K  
 Total 160.445 46.378 110.383

C,0,1.9991012581,-0.7446404209,-2.259699165  
 O,0,2.7746449214,0.4608314914,-2.4080355116  
 C,0,2.7764752357,1.0065000642,-3.6126826673  
 O,0,2.1822035176,0.5747384982,-4.5733649137  
 C,0,3.6397917839,2.2561533747,-3.584392107  
 N,0,3.7300377836,2.9918314704,-4.8856522347  
 C,0,4.439955203,2.1636346937,-5.9178217952  
 C,0,4.5370394966,4.232044221,-4.6275557578  
 C,0,2.3611652444,3.395750662,-5.4427532979  
 C,0,1.462128603,4.0088496952,-4.4135005246  
 C,0,1.1851919223,5.3118105524,-4.3865830858  
 H,0,2.1220664504,-1.0398098054,-1.2211170058

H,0,0.9524227288,-0.5370376996,-2.4844292693  
 H,0,2.3829650687,-1.513323233,-2.9311899834  
 H,0,4.6539311343,1.9758130129,-3.2894278981  
 H,0,3.2478346394,2.9416301204,-2.829403239  
 H,0,3.8702886525,1.2534151264,-6.0908343918  
 H,0,4.5045099774,2.75058318,-6.8338843052  
 H,0,5.4393070758,1.9341326502,-5.5481511672  
 H,0,5.5039437003,3.9387332156,-4.2200863163  
 H,0,4.669180799,4.7562160329,-5.5732038185  
 H,0,3.9979384042,4.8593576785,-3.9186506606  
 H,0,2.579477771,4.0993142796,-6.2488226153  
 H,0,1.9273193218,2.4880766755,-5.8604652531  
 H,0,0.9839517466,3.3369971895,-3.7033204504  
 H,0,1.6276870289,6.0008534451,-5.1021136848  
 H,0,0.498472531,5.724861829,-3.6551818808

### TS M062X/6-31+G\*\*/PCM

/home/bibaswanbiswas/c8/Parentcalcs/23iparentTSm062xp  
 cmSS

try at new ts's with small basis  
 m062X/6-31+G\*\*

E(RM062X) = -518.778953134

Zero-point correction= 0.225580 (Hartree/Particle)  
 Thermal correction to Energy= 0.237903  
 Thermal correction to Enthalpy= 0.238847  
 Thermal correction to Gibbs Free Energy= 0.187871  
 Sum of electronic and ZPE= -518.553373  
 Sum of electronic and thermal Energies= -518.541050  
 Sum of electronic and thermal Enthalpies= -518.540106  
 Sum of electronic and thermal Free Energies= -518.591082

| E             | CV        | S         |
|---------------|-----------|-----------|
| KCal/Mol      | Cal/Mol-K | Cal/Mol-K |
| Total 149.286 | 45.846    | 107.287   |

C,0,2.0079655936,-0.7935153283,-2.3536069007  
 O,0,2.6975626855,0.4497499733,-2.4681593401  
 C,0,2.7778222507,0.9662920821,-3.7264353507  
 C,0,3.3727023027,2.2636023109,-3.7181223987  
 N,0,3.7608795511,2.9160434216,-4.8795746054  
 C,0,4.635873307,4.0629593683,-4.5812225016  
 O,0,2.3169154317,0.3566302452,-4.6938582812  
 C,0,4.2912041559,2.1186818033,-6.0026370172  
 C,0,2.1363527999,3.8099041901,-5.6957164935  
 C,0,1.5289269331,4.2407474105,-4.5064796523  
 C,0,1.126822727,3.2624229175,-3.6269326029  
 H,0,2.0431572378,-1.0544553011,-1.2969439024  
 H,0,0.9707950185,-0.6914397995,-2.6824126833  
 H,0,2.4992479247,-1.5659040525,-2.9495537368  
 H,0,3.7050144967,2.6764631329,-2.7768767993  
 H,0,5.2776284891,1.7243438741,-5.7381170746  
 H,0,3.610329159,1.2997941286,-6.2185802697  
 H,0,4.380961365,2.7729776131,-6.8722610405  
 H,0,5.580107906,3.708171632,-4.1558620402  
 H,0,4.8297675761,4.6153519924,-5.501526219  
 H,0,4.1319340065,4.7128595861,-3.8637747667  
 H,0,2.5720906557,4.5224305677,-6.3927925744  
 H,0,1.7923420512,2.877502255,-6.140222008  
 H,0,1.7149338327,5.2506948297,-4.1477159113

H,0,0.7912029524,2.301032558,-4.0057355428  
 H,0,0.8617135905,3.494119589,-2.5989202865

### Cation- SOGGA11/6-31G\*/Gas- Conf2

/home/bibaswanbiswas/c8/Parentcalcs/gas/SMSOGGA11g  
 asSB

parent sm conf 2

SOGGA11/6-31G\*

E(RSOGGA11) = -519.439679577

C,0,1.9798202338,-0.7762095285,-2.2151157052  
 O,0,2.7012436396,0.4541253901,-2.4094230064  
 C,0,2.8049988195,0.9064345208,-3.6526952863  
 O,0,2.3280223489,0.4111642095,-4.6483309619  
 C,0,3.6741118238,2.1728556777,-3.6024352308  
 N,0,3.741949616,2.9881076067,-4.8738456249  
 C,0,4.4274303364,2.216056744,-5.972857282  
 C,0,4.5616349058,4.2144008088,-4.5739155584  
 C,0,2.3385523732,3.424649043,-5.3860290314  
 C,0,1.4815267505,4.1171740421,-4.3803295744  
 C,0,1.1285978751,5.4017673622,-4.4730298394  
 H,0,1.9783252877,-0.9482402721,-1.1375477318  
 H,0,0.9566560721,-0.6839083377,-2.5916467598  
 H,0,2.4831241533,-1.598479862,-2.733242176  
 H,0,4.7008419712,1.8877787259,-3.3542242628  
 H,0,3.3160655034,2.8286588484,-2.8090057388  
 H,0,3.846796158,1.3225896996,-6.1922948711  
 H,0,4.4927388035,2.8575083045,-6.8530397177  
 H,0,5.431270583,1.9489071086,-5.6367165869  
 H,0,5.537320105,3.9050603396,-4.1952521109  
 H,0,4.6876263947,4.7815176563,-5.4974539013  
 H,0,4.0394286412,4.8210611381,-3.8347454116  
 H,0,2.5488466981,4.0692033288,-6.2411470881  
 H,0,1.8747456118,2.5024995474,-5.7372046811  
 H,0,1.0606175198,3.5040745793,-3.5857543603  
 H,0,1.4890386175,6.047239101,-5.2722683568  
 H,0,0.437701157,5.8513222178,-3.7627721441

Zero-point correction= 0.238319 (Hartree/Particle)  
 Thermal correction to Energy= 0.251473  
 Thermal correction to Enthalpy= 0.252417  
 Thermal correction to Gibbs Free Energy= 0.198953  
 Sum of electronic and ZPE= -519.201361  
 Sum of electronic and thermal Energies= -519.188207  
 Sum of electronic and thermal Enthalpies= -519.187262  
 Sum of electronic and thermal Free Energies= -519.240726

| E             | CV        | S         |
|---------------|-----------|-----------|
| KCal/Mol      | Cal/Mol-K | Cal/Mol-K |
| Total 157.802 | 48.044    | 112.524   |

### TS- SOGGA11/6-31G\*/Gas

/home/bibaswanbiswas/c8/Parentcalcs/gas/TSSOGGA11ga  
 sSB

parent ts exo s-cis

SOGGA11/6-31G\*

E(RSOGGA11) = -518.995048971

Zero-point correction= 0.221969 (Hartree/Particle)

Thermal correction to Energy= 0.234854  
 Thermal correction to Enthalpy= 0.235798  
 Thermal correction to Gibbs Free Energy= 0.183306  
 Sum of electronic and ZPE= -518.773080  
 Sum of electronic and thermal Energies= -518.760195  
 Sum of electronic and thermal Enthalpies= -518.759251  
 Sum of electronic and thermal Free Energies= -518.811743

E CV S  
 KCal/Mol Cal/Mol-K Cal/Mol-K  
 Total 147.373 47.269 110.480

C,0,2.0668125601,-0.8699958378,-2.3949887683  
 O,0,2.8055590313,0.3290931946,-2.4907774755  
 C,0,2.8735089101,0.8662156656,-3.7581064081  
 C,0,3.5767088903,2.1038383569,-3.7234236662  
 N,0,3.8033493162,2.8751101419,-4.8620823723  
 C,0,4.6479561761,4.0475495586,-4.5570456062  
 O,0,2.3647409063,0.3044500071,-4.7315973275  
 C,0,4.3357863934,2.1398937755,-6.0360403834  
 C,0,2.1899713945,3.6792621873,-5.6084659827  
 C,0,1.5161777438,4.3001082119,-4.5110203628  
 C,0,0.8224150887,3.5946490011,-3.5861107169  
 H,0,2.0854127953,-1.1589960154,-1.3396295487  
 H,0,1.0273973765,-0.7348254806,-2.7220826024  
 H,0,2.5043873474,-1.6709008558,-3.0045546317  
 H,0,3.7723845074,2.5764315677,-2.7745382116  
 H,0,5.3565996967,1.8135453254,-5.815298802  
 H,0,3.7015356856,1.2731450533,-6.2079763226  
 H,0,4.3364364197,2.7999139331,-6.9063937099  
 H,0,5.6271890004,3.7081298844,-4.2057370523  
 H,0,4.7661422239,4.6547759786,-5.4561324921  
 H,0,4.1643840525,4.6379703543,-3.7788518199  
 H,0,2.5792527864,4.3181698051,-6.3983353189  
 H,0,1.7814100718,2.7378480939,-5.9632579432  
 H,0,1.694026347,5.361589017,-4.338810724  
 H,0,0.6013579429,2.5414882109,-3.7259886299  
 H,0,0.4133513358,4.0690018654,-2.6967931205

### Cation- M11/6-31G\*/Gas- Conf2

/home/bibaswanbiswas/c8/Parentcalcs/gas/SMM11gasSB  
 parent sm conf 2  
 M11/6-31G\*  
 E(RM11) = -519.142571310

Zero-point correction= 0.241770 (Hartree/Particle)  
 Thermal correction to Energy= 0.254466  
 Thermal correction to Enthalpy= 0.255410  
 Thermal correction to Gibbs Free Energy= 0.202889  
 Sum of electronic and ZPE= -518.900801  
 Sum of electronic and thermal Energies= -518.888106  
 Sum of electronic and thermal Enthalpies= -518.887161  
 Sum of electronic and thermal Free Energies= -518.939682

E CV S  
 KCal/Mol Cal/Mol-K Cal/Mol-K  
 Total 159.680 46.631 110.538

C,0,1.9777653427,-0.724564256,-2.2697283594  
 O,0,2.7644748543,0.4849157165,-2.4058020397

C,0,2.7800558254,1.0284344229,-3.605373081  
 O,0,2.197323612,0.6111407864,-4.5793859447  
 C,0,3.6508301703,2.2821720087,-3.5753892338  
 N,0,3.7392644197,2.9936208194,-4.8916761776  
 C,0,4.4491430357,2.1453357192,-5.9059859817  
 C,0,4.5291515871,4.2471006541,-4.6630192358  
 C,0,2.3607710458,3.3775792004,-5.4519117832  
 C,0,1.4575323012,3.9676195651,-4.4086456984  
 C,0,1.2091478735,5.272964765,-4.3272031703  
 H,0,2.0783060943,-1.021131132,-1.2236455195  
 H,0,0.9333567333,-0.5116267349,-2.523845206  
 H,0,2.3739510009,-1.4945506306,-2.941054651  
 H,0,4.6692052301,2.0075247347,-3.2685419395  
 H,0,3.2485765464,2.9820484049,-2.8314000884  
 H,0,3.8873447831,1.2167699119,-6.0414061679  
 H,0,4.4939226244,2.7045790366,-6.8477003666  
 H,0,5.4647629868,1.9408712053,-5.5463292408  
 H,0,5.4964933939,3.985257209,-4.2186481311  
 H,0,4.6853506927,4.742387762,-5.6282338547  
 H,0,3.9621839132,4.9001229133,-3.9898238223  
 H,0,2.5703126184,4.0955819709,-6.2558762662  
 H,0,1.9396877488,2.4610612708,-5.8759580559  
 H,0,0.9457579364,3.2665942988,-3.7431522247  
 H,0,1.6702062376,5.9896337601,-5.0128104685  
 H,0,0.5141533917,5.6758746174,-3.5897762916

### TS- M11/6-31G\*/Gas

/home/bibaswanbiswas/c8/Parentcalcs/gas/TSM11gasSB  
 parent ts exo s-cis  
 M11/6-31G\*  
 E(RM11) = -518.681738827

Zero-point correction= 0.225643 (Hartree/Particle)  
 Thermal correction to Energy= 0.237656  
 Thermal correction to Enthalpy= 0.238600  
 Thermal correction to Gibbs Free Energy= 0.188571  
 Sum of electronic and ZPE= -518.456096  
 Sum of electronic and thermal Energies= -518.444083  
 Sum of electronic and thermal Enthalpies= -518.443139  
 Sum of electronic and thermal Free Energies= -518.493167

E CV S  
 KCal/Mol Cal/Mol-K Cal/Mol-K  
 Total 149.131 45.275 105.293

C,0,1.9891134653,-0.8093901821,-2.4488932146  
 O,0,2.7070229288,0.4200475128,-2.4866945061  
 C,0,2.765405726,0.9995430201,-3.7156832699  
 C,0,3.3875988892,2.2833395402,-3.6771745216  
 N,0,3.7481725741,2.921696739,-4.864553138  
 C,0,4.5868813635,4.0965560758,-4.5906438888  
 O,0,2.2461124317,0.4672150204,-4.6972788123  
 C,0,4.311828711,2.1035493414,-5.9559156176  
 C,0,2.1518926684,3.6950105842,-5.6691014682  
 C,0,1.5487853978,4.2469954885,-4.5225144534  
 C,0,1.1950642762,3.3349593906,-3.5594354206  
 H,0,2.0138825675,-1.1425089673,-1.4060518138  
 H,0,0.9523946859,-0.6648980083,-2.781793654  
 H,0,2.4611112764,-1.5551415419,-3.1022938667  
 H,0,3.8010437438,2.6572188581,-2.7468082112



H,0,5.3318486052,1.7874184157,-5.6924014585  
 H,0,3.6723294771,1.2300130511,-6.1046590573  
 H,0,4.3407826217,2.7152588416,-6.8685939124  
 H,0,5.5400617114,3.7785560409,-4.1429106453  
 H,0,4.7777456351,4.6354044452,-5.5273922923  
 H,0,4.0502124445,4.7488890899,-3.891114336  
 H,0,2.5444667778,4.340470511,-6.4621241519  
 H,0,1.7790684728,2.7240293595,-6.0137324483  
 H,0,1.7225607029,5.2942802939,-4.2640794072  
 H,0,0.8393544739,2.3490592398,-3.8625225706  
 H,0,0.9495123722,3.6398888401,-2.5396738631

### Cation- SOGGA11X/6-31G\*/Gas- Conf2

/home/bibaswanbiswas/c8/Parentcalcs/gas/SMSOGGA11X  
 gasSB  
 parent sm conf 2  
 SOGGA11X/6-31G\*  
 E(RSOGGA11X) = -519.282912340

Zero-point correction= 0.246556 (Hartree/Particle)  
 Thermal correction to Energy= 0.259214  
 Thermal correction to Enthalpy= 0.260159  
 Thermal correction to Gibbs Free Energy= 0.207596  
 Sum of electronic and ZPE= -519.036356  
 Sum of electronic and thermal Energies= -519.023698  
 Sum of electronic and thermal Enthalpies= -519.022754  
 Sum of electronic and thermal Free Energies= -519.075316

| E             | CV        | S         |
|---------------|-----------|-----------|
| KCal/Mol      | Cal/Mol-K | Cal/Mol-K |
| Total 162.660 | 46.153    | 110.628   |

C,0,2.0346290851,-0.8052187547,-2.2744266965  
 O,0,2.7798372036,0.4271214551,-2.4180481469  
 C,0,2.783383088,0.9695801425,-3.6180540196  
 O,0,2.2211340968,0.5441651978,-4.598339211  
 C,0,3.6267510831,2.2415403963,-3.5671917205  
 N,0,3.7201950627,2.9909512364,-4.8641618568  
 C,0,4.4145260975,2.161008048,-5.9049953949  
 C,0,4.5351958172,4.2223575564,-4.6089408928  
 C,0,2.3413290031,3.4024544034,-5.4074555797  
 C,0,1.4761337744,4.0946492165,-4.4000964787  
 C,0,1.192153366,5.3967875287,-4.4575718715  
 H,0,2.1563386387,-1.0862445989,-1.2309185839  
 H,0,0.985214809,-0.6313809143,-2.5149498917  
 H,0,2.4496266477,-1.565370226,-2.937246478  
 H,0,4.6434020769,1.9816957645,-3.2589329609  
 H,0,3.2155630252,2.9167622552,-2.8132524146  
 H,0,3.8334823429,1.2575235556,-6.0793081771  
 H,0,4.4870539979,2.749960652,-6.8204886154  
 H,0,5.4156608138,1.9143374003,-5.5462133974  
 H,0,5.5049290463,3.9302699871,-4.2027160911  
 H,0,4.6753517609,4.7487851157,-5.5542433955  
 H,0,4.0033993626,4.8607273357,-3.9031335815  
 H,0,2.5564218572,4.0512096541,-6.2603115065  
 H,0,1.8810957098,2.479219093,-5.760363031  
 H,0,0.9990250355,3.472014199,-3.645143831  
 H,0,1.6078749826,6.0455647463,-5.2256769479  
 H,0,0.509324215,5.8568475542,-3.7501422279

### TS- SOGGA11X/6-31G\*/Gas

/home/bibaswanbiswas/c8/Parentcalcs/gas/TSSOGGA11X  
 gasSB  
 parent ts exo s-cis  
 SOGGA11X/6-31G\*  
 E(RSOGGA11X) = -518.818183233

Zero-point correction= 0.229415 (Hartree/Particle)  
 Thermal correction to Energy= 0.241663  
 Thermal correction to Enthalpy= 0.242607  
 Thermal correction to Gibbs Free Energy= 0.191836  
 Sum of electronic and ZPE= -518.588768  
 Sum of electronic and thermal Energies= -518.576520  
 Sum of electronic and thermal Enthalpies= -518.575576  
 Sum of electronic and thermal Free Energies= -518.626347

| E             | CV        | S         |
|---------------|-----------|-----------|
| KCal/Mol      | Cal/Mol-K | Cal/Mol-K |
| Total 151.646 | 45.392    | 106.857   |

C,0,2.0337956752,-0.8187408272,-2.3949807224  
 O,0,2.7180805973,0.4236866169,-2.4739637608  
 C,0,2.773443403,0.9659157892,-3.7215106847  
 C,0,3.4063919793,2.2454924329,-3.6981029262  
 N,0,3.7645657372,2.9103700611,-4.8651545267  
 C,0,4.6379809469,4.0537689972,-4.5789114214  
 O,0,2.2807844988,0.3956795036,-4.69325368  
 C,0,4.2907408998,2.1019757374,-5.9793170045  
 C,0,2.1477188206,3.7859572252,-5.686533522  
 C,0,1.5265065228,4.2673873471,-4.5177777758  
 C,0,1.076673442,3.3466883371,-3.6097101842  
 H,0,2.0716764058,-1.1070857628,-1.3432247689  
 H,0,0.9950507205,-0.7198215734,-2.7225121952  
 H,0,2.5220269049,-1.5773289759,-3.0129346484  
 H,0,3.7415074933,2.6610344708,-2.7596500419  
 H,0,5.2991249677,1.7477658166,-5.7356020282  
 H,0,3.6299508578,1.2523574658,-6.1390331721  
 H,0,4.3310371666,2.7278634638,-6.8757105221  
 H,0,5.582805209,3.707154576,-4.1444599574  
 H,0,4.8388529528,4.5991286422,-5.5039700156  
 H,0,4.1337230432,4.7147805558,-3.8708055681  
 H,0,2.5638686248,4.4797492496,-6.4155815945  
 H,0,1.790135353,2.8466999687,-6.1026417233  
 H,0,1.6984491657,5.297389436,-4.2085335832  
 H,0,0.7771653502,2.3568544215,-3.9368977865  
 H,0,0.7821972621,3.6327380251,-2.6032661855

### Cation- M11L/6-31G\*/Gas- Conf2

/home/bibaswanbiswas/c8/Parentcalcs/gas/SMM11LgasSB  
 parent sm conf 2  
 M11L/6-31G\*  
 E(RM11L) = -519.255175775

Zero-point correction= 0.235966 (Hartree/Particle)  
 Thermal correction to Energy= 0.249184  
 Thermal correction to Enthalpy= 0.250128  
 Thermal correction to Gibbs Free Energy= 0.195337  
 Sum of electronic and ZPE= -519.019210  
 Sum of electronic and thermal Energies= -519.005991  
 Sum of electronic and thermal Enthalpies= -519.005047

Sum of electronic and thermal Free Energies= -519.059839

| E        | CV        | S              |
|----------|-----------|----------------|
| KCal/Mol | Cal/Mol-K | Cal/Mol-K      |
| Total    | 156.366   | 47.624 115.319 |

C,0,2.0249147956,-0.7192511392,-2.300208613  
 O,0,2.7830186235,0.4827623455,-2.4221330613  
 C,0,2.7835477207,1.007634739,-3.6116546375  
 O,0,2.2161253562,0.5894905091,-4.5754859232  
 C,0,3.633177064,2.2599182229,-3.5752519294  
 N,0,3.7207070389,2.979459038,-4.867257703  
 C,0,4.4075019531,2.1567610104,-5.8852386471  
 C,0,4.5172082092,4.1998834618,-4.6280670379  
 C,0,2.3595395452,3.3816085125,-5.409560424  
 C,0,1.4822239535,4.0181077826,-4.3996037916  
 C,0,1.2051102439,5.315454341,-4.3986103643  
 H,0,2.149706884,-1.0318233023,-1.2590035086  
 H,0,0.9676862451,-0.5224064929,-2.5265731952  
 H,0,2.4139315682,-1.4821342216,-2.9884588403  
 H,0,4.6592027506,2.0032521956,-3.2630047457  
 H,0,3.2370436649,2.958675112,-2.820321011  
 H,0,3.8348381228,1.2382766831,-6.0603969479  
 H,0,4.4735419438,2.7384503028,-6.8150093297  
 H,0,5.4211089847,1.9193348446,-5.5325203503  
 H,0,5.4949821761,3.920236815,-4.2117441472  
 H,0,4.6621624918,4.724563835,-5.5825479297  
 H,0,3.9810527841,4.8510339901,-3.9237934385  
 H,0,2.5817914243,4.0686418923,-6.2439053264  
 H,0,1.9157819206,2.4613828366,-5.8176175697  
 H,0,0.9770031942,3.3536359843,-3.6853427584  
 H,0,1.6444746864,6.0014659965,-5.1339984131  
 H,0,0.5016486542,5.7529027051,-3.6850133562

### TS- M11L/6-31G\*/Gas

/home/bibaswanbiswas/c8/Parentcalcs/gas/TSM11LgasSB  
 parent ts exo s-cis  
 M11L/6-31G\*  
 E(RM11L) = -518.813902185

Zero-point correction= 0.219337 (Hartree/Particle)  
 Thermal correction to Energy= 0.232165  
 Thermal correction to Enthalpy= 0.233109  
 Thermal correction to Gibbs Free Energy= 0.181072  
 Sum of electronic and ZPE= -518.594565  
 Sum of electronic and thermal Energies= -518.581737  
 Sum of electronic and thermal Enthalpies= -518.580793  
 Sum of electronic and thermal Free Energies= -518.632830

| E        | CV        | S              |
|----------|-----------|----------------|
| KCal/Mol | Cal/Mol-K | Cal/Mol-K      |
| Total    | 145.686   | 47.472 109.521 |

C,0,2.0005719324,-0.7485365973,-2.4426445577  
 O,0,2.742958879,0.4319150475,-2.4901268005  
 C,0,2.8420877931,0.9494421424,-3.7263555714  
 C,0,3.5623865725,2.1730797313,-3.6975902581  
 N,0,3.8367406597,2.8657306597,-4.8363407126  
 C,0,4.6381675029,4.0372883549,-4.5802791724  
 O,0,2.349549803,0.4014241047,-4.6902734874

C,0,4.3260254718,2.1167975711,-5.9766336208  
 C,0,2.1139310834,3.7163874351,-5.6644085453  
 C,0,1.5289998968,4.2110635575,-4.492862903  
 C,0,1.0094709782,3.3697748706,-3.5658674332  
 H,0,2.0094864201,-1.0665215251,-1.3909913357  
 H,0,0.961693272,-0.5878204298,-2.7783806163  
 H,0,2.4439086491,-1.533643631,-3.0775203529  
 H,0,3.7560864057,2.6690506336,-2.7483698432  
 H,0,5.3564892449,1.7668468572,-5.7809278421  
 H,0,3.6737773083,1.2537186896,-6.1533665782  
 H,0,4.3272495644,2.7761072388,-6.8591994662  
 H,0,5.632658852,3.7493229201,-4.1921300074  
 H,0,4.7626493405,4.6129316609,-5.5094675658  
 H,0,4.1302671163,4.6651300519,-3.8323630904  
 H,0,2.4955567164,4.4040818315,-6.4302352538  
 H,0,1.7758408228,2.7414356712,-6.0383592099  
 H,0,1.698354791,5.264529982,-4.2255532245  
 H,0,0.7545099446,2.3389365408,-3.8330279672  
 H,0,0.6848349794,3.718987631,-2.5807645839

### Cation- MN12L/6-31G\*/Gas- Conf2

/home/bibaswanbiswas/c8/Parentcalcs/gas/SMMN12LgasS  
 B  
 parent sm conf 2  
 MN12L/6-31G\*  
 E(RMN12L) = -518.878893022

Zero-point correction= 0.243781 (Hartree/Particle)  
 Thermal correction to Energy= 0.256324  
 Thermal correction to Enthalpy= 0.257269  
 Thermal correction to Gibbs Free Energy= 0.205211  
 Sum of electronic and ZPE= -518.635112  
 Sum of electronic and thermal Energies= -518.622569  
 Sum of electronic and thermal Enthalpies= -518.621624  
 Sum of electronic and thermal Free Energies= -518.673682

| E        | CV        | S              |
|----------|-----------|----------------|
| KCal/Mol | Cal/Mol-K | Cal/Mol-K      |
| Total    | 160.846   | 46.202 109.565 |

C,0,1.982134696,-0.6898426066,-2.2606374093  
 O,0,2.7814197438,0.4950011646,-2.4133649704  
 C,0,2.7647421192,1.0483673982,-3.6011724494  
 O,0,2.1457677112,0.6593302107,-4.5600651829  
 C,0,3.6466517985,2.2822574125,-3.5814425652  
 N,0,3.7410069395,2.9866473258,-4.8983366183  
 C,0,4.450049639,2.1414510338,-5.906332346  
 C,0,4.5349044362,4.2302470095,-4.6641876294  
 C,0,2.3708407484,3.3916277727,-5.4734184211  
 C,0,1.4488009829,3.9285191179,-4.4317097179  
 C,0,1.1950508761,5.2283637095,-4.2949113784  
 H,0,2.1124466052,-0.9940357112,-1.2236706304  
 H,0,0.9353355799,-0.4602190776,-2.4750099681  
 H,0,2.3356979391,-1.4645650755,-2.9455666334  
 H,0,4.6644488956,2.009725848,-3.2756374682  
 H,0,3.2618861105,2.9964354257,-2.8426727816  
 H,0,3.8919387791,1.2146987444,-6.050977395  
 H,0,4.4992227879,2.7007813353,-6.8451846103  
 H,0,5.4627214551,1.9358506377,-5.5463732593  
 H,0,5.4897009942,3.9648963616,-4.2009996046

H,0,4.7131680133,4.7186255415,-5.6262298907  
 H,0,3.9636290097,4.8915369341,-4.0051979295  
 H,0,2.6056230976,4.1445481356,-6.2362826087  
 H,0,1.9691149074,2.4962628402,-5.9542118535  
 H,0,0.930323994,3.1936420422,-3.8122501762  
 H,0,1.6660377387,5.9748886034,-4.936758713  
 H,0,0.4863664016,5.6022758659,-3.5597207896

### TS- MN12L/6-31G\*/Gas

/home/bibaswanbiswas/c8/Parentcalcs/gas/TSMN12LgasS  
 B

parent ts exo s-cis  
 MN12L/6-31G\*  
 E(RMN12L) = -518.430596673

Zero-point correction= 0.225642 (Hartree/Particle)  
 Thermal correction to Energy= 0.238139  
 Thermal correction to Enthalpy= 0.239083  
 Thermal correction to Gibbs Free Energy= 0.187929  
 Sum of electronic and ZPE= -518.204955  
 Sum of electronic and thermal Energies= -518.192458  
 Sum of electronic and thermal Enthalpies= -518.191514  
 Sum of electronic and thermal Free Energies= -518.242668

| E             | CV        | S         |
|---------------|-----------|-----------|
| KCal/Mol      | Cal/Mol-K | Cal/Mol-K |
| Total 149.434 | 46.378    | 107.663   |

C,0,1.9478226148,-0.7680069572,-2.4484615478  
 O,0,2.7271891489,0.407736052,-2.4937929803  
 C,0,2.8308958241,0.9656074106,-3.7228223348  
 C,0,3.569497527,2.1782221256,-3.6837587388  
 N,0,3.8579146469,2.869804375,-4.8375990226  
 C,0,4.6241725409,4.0819853814,-4.5822755942  
 O,0,2.3019736506,0.4555964719,-4.7071366689  
 C,0,4.3643466891,2.1245989844,-5.9917725842  
 C,0,2.078862244,3.6752397134,-5.6749358345  
 C,0,1.5331491583,4.2027144903,-4.4981659585  
 C,0,1.0627783473,3.3637568485,-3.5299113797  
 H,0,1.9563689,-1.0925457019,-1.4058044224  
 H,0,0.9196199243,-0.5744343671,-2.7769294217  
 H,0,2.3699774433,-1.54722473,-3.0933971624  
 H,0,3.8265330922,2.6396618578,-2.7378888254  
 H,0,5.3998473641,1.8048350325,-5.8036405319  
 H,0,3.7319322879,1.2521431756,-6.1627031884  
 H,0,4.3414215554,2.7843177103,-6.8674562051  
 H,0,5.621556246,3.8322755214,-4.1905390956  
 H,0,4.7284219047,4.6501346646,-5.5123900345  
 H,0,4.0870533912,4.6869934679,-3.8436719635  
 H,0,2.4710371565,4.3216841523,-6.460995412  
 H,0,1.7839012825,2.6706754247,-5.982544383  
 H,0,1.6949138813,5.2582295,-4.2675626212  
 H,0,0.8060203073,2.3352026433,-3.7761457009  
 H,0,0.7770468718,3.7182577527,-2.5417383875

### Cation- N12/6-31G\*/Gas- Conf2

/home/bibaswanbiswas/c8/Parentcalcs/gas/SMN12gasSB  
 parent sm conf 2  
 N12/6-31G\*

E(RN12) = -519.298176840

Zero-point correction= 0.241070 (Hartree/Particle)  
 Thermal correction to Energy= 0.253204  
 Thermal correction to Enthalpy= 0.254148  
 Thermal correction to Gibbs Free Energy= 0.202914  
 Sum of electronic and ZPE= -519.057107  
 Sum of electronic and thermal Energies= -519.044973  
 Sum of electronic and thermal Enthalpies= -519.044028  
 Sum of electronic and thermal Free Energies= -519.095263

| E             | CV        | S         |
|---------------|-----------|-----------|
| KCal/Mol      | Cal/Mol-K | Cal/Mol-K |
| Total 158.888 | 45.268    | 107.831   |

C,0,2.059856015,-0.8262562526,-2.2923624338  
 O,0,2.7934728317,0.4010963822,-2.4373966514  
 C,0,2.7878456781,0.9628714489,-3.6246860965  
 O,0,2.2228646096,0.5465605028,-4.6079118481  
 C,0,3.6166863846,2.237734902,-3.5589343712  
 N,0,3.7163160055,2.9898559463,-4.8493959032  
 C,0,4.4008880016,2.1611747867,-5.8894396309  
 C,0,4.5267611147,4.2166820338,-4.5940611027  
 C,0,2.3312228264,3.4022100176,-5.3849391727  
 C,0,1.4932104758,4.1321874268,-4.3989768129  
 C,0,1.2010091727,5.4283504441,-4.5048925767  
 H,0,2.2277134011,-1.1415052139,-1.2706231515  
 H,0,1.0046247544,-0.6462022764,-2.4748394882  
 H,0,2.4334735551,-1.5645816117,-2.9952394849  
 H,0,4.6276816917,1.9936291123,-3.2406005433  
 H,0,3.1941282197,2.90769644,-2.8149807181  
 H,0,3.8122473911,1.2693091357,-6.0619881038  
 H,0,4.4776977498,2.7488796157,-6.7979912786  
 H,0,5.3936180237,1.9050989379,-5.5324763091  
 H,0,5.4880065936,3.9287702755,-4.1810274254  
 H,0,4.6721701779,4.7370413664,-5.5349528914  
 H,0,3.9894591887,4.853587062,-3.900257469  
 H,0,2.5439041612,4.0106944055,-6.2597477656  
 H,0,1.8678519889,2.4701198896,-5.6929422745  
 H,0,1.0380318972,3.5457460782,-3.610771825  
 H,0,1.5936270266,6.0433267043,-5.3041579261  
 H,0,0.5346630633,5.9132404402,-3.8067297458

### TS- N12/6-31G\*/Gas

/home/bibaswanbiswas/c8/Parentcalcs/gas/TSN12gasSB  
 parent ts exo s-cis  
 N12/6-31G\*  
 E(RN12) = -518.850311079

Zero-point correction= 0.223991 (Hartree/Particle)  
 Thermal correction to Energy= 0.236726  
 Thermal correction to Enthalpy= 0.237670  
 Thermal correction to Gibbs Free Energy= 0.185716  
 Sum of electronic and ZPE= -518.626320  
 Sum of electronic and thermal Energies= -518.613585  
 Sum of electronic and thermal Enthalpies= -518.612641  
 Sum of electronic and thermal Free Energies= -518.664596

| E        | CV        | S         |
|----------|-----------|-----------|
| KCal/Mol | Cal/Mol-K | Cal/Mol-K |

Total 148.548 46.890 109.348

C,0,2.0432916881,-0.8451035306,-2.4454135796  
 O,0,2.7402871057,0.3787150029,-2.4998686936  
 C,0,2.8189259179,0.9465613132,-3.7346546297  
 C,0,3.5146914936,2.1789017487,-3.693552363  
 N,0,3.7927970122,2.8903745549,-4.8492593075  
 C,0,4.62799759,4.0589385695,-4.5724749815  
 O,0,2.3120175886,0.4102621972,-4.7207350884  
 C,0,4.314306732,2.110305683,-5.9810457707  
 C,0,2.1651498674,3.6863875275,-5.6392528991  
 C,0,1.5341870422,4.2777095948,-4.5207485308  
 C,0,0.9708551756,3.4985970545,-3.5631162237  
 H,0,2.0634967121,-1.1539618195,-1.4044854617  
 H,0,1.0132621228,-0.7328769916,-2.7819753982  
 H,0,2.5210454435,-1.600325607,-3.0687922825  
 H,0,3.771408036,2.6328425939,-2.7551804899  
 H,0,5.3295602305,1.784347169,-5.7575373483  
 H,0,3.6718846435,1.2484563379,-6.1196997601  
 H,0,4.31719364,2.7346765504,-6.8711639953  
 H,0,5.5866011554,3.7393237887,-4.1652822987  
 H,0,4.7862602532,4.617719147,-5.4900439568  
 H,0,4.1180661133,4.6877361163,-3.8490770482  
 H,0,2.5524482335,4.3176097252,-6.4294464613  
 H,0,1.7909162015,2.7267941379,-5.9699187188  
 H,0,1.691256693,5.3327431922,-4.3289346834  
 H,0,0.7405085037,2.4629882055,-3.758415575  
 H,0,0.6258388048,3.9077387386,-2.6239644539

### Cation- N12SX/6-31G\*/Gas- Conf2

/home/bibaswanbiswas/c8/Parentcalcs/gas/SMN12SXgasSB

B  
 parent sm conf 2  
 N12SX/6-31G\*  
 E(RN12SX) = -519.152815042

Zero-point correction= 0.245562 (Hartree/Particle)  
 Thermal correction to Energy= 0.258294  
 Thermal correction to Enthalpy= 0.259239  
 Thermal correction to Gibbs Free Energy= 0.206509  
 Sum of electronic and ZPE= -518.907253  
 Sum of electronic and thermal Energies= -518.894521  
 Sum of electronic and thermal Enthalpies= -518.893576  
 Sum of electronic and thermal Free Energies= -518.946306

| E             | CV        | S         |
|---------------|-----------|-----------|
| KCal/Mol      | Cal/Mol-K | Cal/Mol-K |
| Total 162.082 | 46.416    | 110.978   |

C,0,2.0425604974,-0.8052785082,-2.2769344952  
 O,0,2.7756716394,0.4215287286,-2.4312262312  
 C,0,2.7867889466,0.9686901233,-3.6252396823  
 O,0,2.2304965601,0.5422448947,-4.607373687  
 C,0,3.6227705187,2.2370744476,-3.570254777  
 N,0,3.7177972538,2.9897075073,-4.8600894305  
 C,0,4.40835375,2.1665991074,-5.9020847652  
 C,0,4.5279014626,4.2180131072,-4.6020443805  
 C,0,2.3393573086,3.4011882712,-5.3973045127  
 C,0,1.4872588232,4.1049764716,-4.3983032405  
 C,0,1.2002367547,5.4022303214,-4.4710387085

H,0,2.1613041348,-1.0846822231,-1.2370119741  
 H,0,0.9956035607,-0.6422729071,-2.5182322305  
 H,0,2.4560408762,-1.56638468,-2.9331678538  
 H,0,4.6346304492,1.981224154,-3.2594474605  
 H,0,3.2103243184,2.9061452076,-2.8182950918  
 H,0,3.8291485205,1.2680233026,-6.0788892505  
 H,0,4.4807012595,2.7553160812,-6.812034935  
 H,0,5.4052762064,1.9173118696,-5.5478944  
 H,0,5.4931443033,3.9297025897,-4.1950692804  
 H,0,4.6695446023,4.7446828933,-5.5415127561  
 H,0,3.9949234873,4.8527932209,-3.9010584775  
 H,0,2.5499158722,4.0347556145,-6.2563532469  
 H,0,1.8763257664,2.4785210209,-5.7346305655  
 H,0,1.0227834093,3.4963083365,-3.6309479259  
 H,0,1.6033546366,6.0387448183,-5.2494766343  
 H,0,0.5268170816,5.8701542291,-3.7664070069

### TS- N12SX/6-31G\*/Gas

/home/bibaswanbiswas/c8/Parentcalcs/gas/TSN12SXgasSB  
 parent ts exo s-cis  
 N12SX/6-31G\*  
 E(RN12SX) = -518.693748885

Zero-point correction= 0.228453 (Hartree/Particle)  
 Thermal correction to Energy= 0.240818  
 Thermal correction to Enthalpy= 0.241762  
 Thermal correction to Gibbs Free Energy= 0.190717  
 Sum of electronic and ZPE= -518.465296  
 Sum of electronic and thermal Energies= -518.452931  
 Sum of electronic and thermal Enthalpies= -518.451987  
 Sum of electronic and thermal Free Energies= -518.503031

| E             | CV        | S         |
|---------------|-----------|-----------|
| KCal/Mol      | Cal/Mol-K | Cal/Mol-K |
| Total 151.116 | 45.706    | 107.433   |

C,0,2.0342013524,-0.8156767844,-2.4030759169  
 O,0,2.7174901676,0.4176494315,-2.485695148  
 C,0,2.7817290626,0.9673869813,-3.7258277046  
 C,0,3.4226632692,2.2342488281,-3.700232991  
 N,0,3.7703428624,2.9063045649,-4.8614357202  
 C,0,4.6304689721,4.0549899545,-4.5788061692  
 O,0,2.2883260217,0.4036060082,-4.7006734088  
 C,0,4.2890531059,2.106025795,-5.9791414569  
 C,0,2.1602709532,3.7657018984,-5.6731762803  
 C,0,1.5370316123,4.2622972939,-4.5153440952  
 C,0,1.0648295368,3.3666961502,-3.6029522552  
 H,0,2.0652786412,-1.107598369,-1.3566637341  
 H,0,1.0003554722,-0.717535903,-2.7335169848  
 H,0,2.5167739039,-1.5749786129,-3.0179075582  
 H,0,3.7426376356,2.6542111971,-2.7638257399  
 H,0,5.2981613676,1.7622881424,-5.7462260915  
 H,0,3.6363158683,1.2531190473,-6.1262210249  
 H,0,4.3136991406,2.7250100126,-6.8746084716  
 H,0,5.575247152,3.7174136863,-4.1497263248  
 H,0,4.8234486717,4.6015270832,-5.4988817438  
 H,0,4.1249279567,4.7072851555,-3.8711735794  
 H,0,2.5733712232,4.4466529114,-6.4087858767  
 H,0,1.8004055985,2.8270610359,-6.0760828292  
 H,0,1.7015125101,5.2943907972,-4.2258204037

H,0,0.7835659699,2.369855645,-3.9092442086  
H,0,0.7621459725,3.6695290497,-2.6089942825

### Cation- MN12SX/6-31G\*/Gas- Conf2

/home/bibaswanbiswas/c8/Parentcalcs/gas/SMMN12SXgas  
SB

parent sm conf 2  
MN12SX/6-31G\*  
E(RMN12SX) = -518.982546949

Zero-point correction= 0.243079 (Hartree/Particle)  
Thermal correction to Energy= 0.255846  
Thermal correction to Enthalpy= 0.256790  
Thermal correction to Gibbs Free Energy= 0.203916  
Sum of electronic and ZPE= -518.739468  
Sum of electronic and thermal Energies= -518.726701  
Sum of electronic and thermal Enthalpies= -518.725757  
Sum of electronic and thermal Free Energies= -518.778631

| E             | CV        | S         |
|---------------|-----------|-----------|
| KCal/Mol      | Cal/Mol-K | Cal/Mol-K |
| Total 160.546 | 46.628    | 111.283   |

C,0,1.9988732249,-0.7305065565,-2.2600201146  
O,0,2.771498644,0.4737052925,-2.4119993288  
C,0,2.7743736917,1.0122810745,-3.6105058473  
O,0,2.1878656314,0.5981585411,-4.5802953329  
C,0,3.6413666086,2.2626871745,-3.5803765591  
N,0,3.7338020949,2.9878940953,-4.8871157883  
C,0,4.4374836103,2.1533149433,-5.9117573479  
C,0,4.5363126396,4.2261305113,-4.6414857312  
C,0,2.3612299291,3.3956450148,-5.4452497141  
C,0,1.45926989,3.9938279471,-4.4156552435  
C,0,1.1904278466,5.2962012901,-4.357553421  
H,0,2.1174369565,-1.0189807117,-1.2140955523  
H,0,0.9481160247,-0.5306084736,-2.4958878629  
H,0,2.386498369,-1.5071144994,-2.9279663095  
H,0,4.6603147109,1.9903056714,-3.2735589017  
H,0,3.2471302011,2.9588065948,-2.8283981335  
H,0,3.8689299849,1.2349743651,-6.080024512  
H,0,4.5018640198,2.7317417363,-6.8395905556  
H,0,5.4464278925,1.9253735656,-5.5506472645  
H,0,5.5036257273,3.9479854786,-4.2094599377  
H,0,4.6930088576,4.7390711657,-5.5961678777  
H,0,3.9858710098,4.8757423611,-3.9526735908  
H,0,2.5860999065,4.1100562309,-6.2481154371  
H,0,1.9302749552,2.4879381432,-5.880609699  
H,0,0.9532915171,3.2990237591,-3.740045468  
H,0,1.6412281477,6.0104645992,-5.0507844263  
H,0,0.4864099079,5.7031986853,-3.6322830433

### TS- MN12SX/6-31G\*/Gas

/home/bibaswanbiswas/c8/Parentcalcs/gas/TSMN12SXgas  
SB

parent ts exo s-cis  
MN12SX/6-31G\*  
E(RMN12SX) = -518.531483626

Zero-point correction= 0.225892 (Hartree/Particle)

Thermal correction to Energy= 0.238352  
Thermal correction to Enthalpy= 0.239297  
Thermal correction to Gibbs Free Energy= 0.188205  
Sum of electronic and ZPE= -518.305591  
Sum of electronic and thermal Energies= -518.293131  
Sum of electronic and thermal Enthalpies= -518.292187  
Sum of electronic and thermal Free Energies= -518.343279

| E             | CV        | S         |
|---------------|-----------|-----------|
| KCal/Mol      | Cal/Mol-K | Cal/Mol-K |
| Total 149.568 | 46.295    | 107.532   |

C,0,1.9726834518,-0.7773424101,-2.4245075482  
O,0,2.7166557363,0.4221360397,-2.4852083679  
C,0,2.8093143302,0.9686307902,-3.7246066717  
C,0,3.5056606665,2.2085097573,-3.6936803286  
N,0,3.8207374446,2.8879819157,-4.8521859064  
C,0,4.6306943811,4.0742789889,-4.5860776173  
O,0,2.2979154396,0.4295420185,-4.7038338531  
C,0,4.3396305043,2.1187458941,-5.9895327473  
C,0,2.1058275696,3.7170551612,-5.6771827594  
C,0,1.5309037527,4.215593553,-4.4984708419  
C,0,1.0751224359,3.338370215,-3.5576454418  
H,0,1.9901522475,-1.0878662433,-1.3750583839  
H,0,0.9368718247,-0.620709321,-2.7544939029  
H,0,2.4199570187,-1.5553362332,-3.0568979214  
H,0,3.7937572798,2.6504730858,-2.7473018634  
H,0,5.3662885708,1.7856359095,-5.7749942323  
H,0,3.6983760993,1.2516593305,-6.1626710079  
H,0,4.3466822454,2.7660106268,-6.8757018649  
H,0,5.6116490023,3.7843764261,-4.179632822  
H,0,4.7733810988,4.6380483254,-5.5149941964  
H,0,4.1095964325,4.7038062628,-3.8554842692  
H,0,2.4984841628,4.3917525279,-6.4410687205  
H,0,1.7812845848,2.7379872308,-6.0374213772  
H,0,1.6952030325,5.2624052181,-4.2297838042  
H,0,0.7945877496,2.3245715378,-3.8401564277  
H,0,0.7928369367,3.6611443929,-2.5554471221

### Cation- APFD/6-31G\*/Gas- Conf2

/home/bibaswanbiswas/c8/Parentcalcs/gas/SMAPFDgasSB  
parent sm conf 2  
APFD/6-31G\*  
E(RAPFD) = -519.013400141

Zero-point correction= 0.242905 (Hartree/Particle)  
Thermal correction to Energy= 0.255680  
Thermal correction to Enthalpy= 0.256624  
Thermal correction to Gibbs Free Energy= 0.203691  
Sum of electronic and ZPE= -518.770496  
Sum of electronic and thermal Energies= -518.757720  
Sum of electronic and thermal Enthalpies= -518.756776  
Sum of electronic and thermal Free Energies= -518.809709

| E             | CV        | S         |
|---------------|-----------|-----------|
| KCal/Mol      | Cal/Mol-K | Cal/Mol-K |
| Total 160.442 | 46.721    | 111.407   |

C,0,2.0028096039,-0.7579125726,-2.2619185322  
O,0,2.7603587791,0.4632020043,-2.4162455456

C,0,2.7814091688,0.9845453544,-3.6278764353  
 O,0,2.2243469114,0.5511981515,-4.6111524054  
 C,0,3.6394540636,2.2468650025,-3.5829164071  
 N,0,3.7310386336,2.9917105354,-4.8811400198  
 C,0,4.4338062747,2.166178101,-5.9144079196  
 C,0,4.5255772785,4.2326999792,-4.6263395243  
 C,0,2.3478707997,3.3889209554,-5.4252883833  
 C,0,1.46762644,4.0318123241,-4.4039247237  
 C,0,1.209095971,5.3404113688,-4.3911779487  
 H,0,2.1094193454,-1.0273131388,-1.2133331446  
 H,0,0.9563104665,-0.5799938579,-2.5165562483  
 H,0,2.4146420213,-1.5338731464,-2.9098979408  
 H,0,4.6563985044,1.9808971814,-3.2798347384  
 H,0,3.2379070529,2.9309169026,-2.8310324275  
 H,0,3.8745514656,1.2448743635,-6.0672911412  
 H,0,4.4801146622,2.7402879783,-6.8410143846  
 H,0,5.4448562406,1.9509435322,-5.5636323562  
 H,0,5.4880401968,3.9595136035,-4.1908958582  
 H,0,4.6835576703,4.7469831526,-5.5754653531  
 H,0,3.9659466567,4.8742082667,-3.9447142233  
 H,0,2.5573080645,4.063118037,-6.2599547591  
 H,0,1.9100098486,2.4657368777,-5.806549687  
 H,0,0.9733685399,3.3714318976,-3.6924462413  
 H,0,1.6499418317,6.0223583055,-5.1162701516  
 H,0,0.5232655079,5.7775968403,-3.6710465001

### TS- APFD/6-31G\*/Gas

/home/bibaswanbiswas/c8/Parentcalcs/gas/TSAPFDgasSB  
 parent ts exo s-cis  
 APFD/6-31G\*  
 E(RAPFD) = -518.557977027

Zero-point correction= 0.225785 (Hartree/Particle)  
 Thermal correction to Energy= 0.238257  
 Thermal correction to Enthalpy= 0.239201  
 Thermal correction to Gibbs Free Energy= 0.187940  
 Sum of electronic and ZPE= -518.332192  
 Sum of electronic and thermal Energies= -518.319720  
 Sum of electronic and thermal Enthalpies= -518.318776  
 Sum of electronic and thermal Free Energies= -518.370037

| E             | CV        | S         |
|---------------|-----------|-----------|
| KCal/Mol      | Cal/Mol-K | Cal/Mol-K |
| Total 149.508 | 46.168    | 107.888   |

C,0,1.9937289045,-0.8020044167,-2.4291077463  
 O,0,2.730001606,0.4091235159,-2.490541345  
 C,0,2.8010410311,0.9681860397,-3.7338620599  
 C,0,3.483428446,2.2139905361,-3.6963200822  
 N,0,3.7891938175,2.902452745,-4.8615945172  
 C,0,4.6247519225,4.0741334529,-4.5835182219  
 O,0,2.2850676704,0.4367967457,-4.7201842394  
 C,0,4.3277308793,2.1152582729,-5.9832572318  
 C,0,2.1416049357,3.707520644,-5.6634083882  
 C,0,1.5287765357,4.2402313405,-4.5076307153  
 C,0,1.0672342554,3.3741322208,-3.5600127737  
 H,0,2.0288149283,-1.1166398442,-1.3845637083  
 H,0,0.955214864,-0.6528735846,-2.7427419856  
 H,0,2.4383568592,-1.5700981119,-3.0699169686  
 H,0,3.7882668961,2.6478031367,-2.7557179326

H,0,5.349508428,1.7972716314,-5.7481842925  
 H,0,3.6918729659,1.2437924058,-6.1299061051  
 H,0,4.332997185,2.7387005427,-6.8818152713  
 H,0,5.5849078712,3.7560638818,-4.1620234374  
 H,0,4.7942747803,4.629331006,-5.5086115034  
 H,0,4.1041126913,4.7127929495,-3.8671037246  
 H,0,2.5281912802,4.3716465983,-6.4355923111  
 H,0,1.784992369,2.7452624533,-6.0255997171  
 H,0,1.6851457731,5.2897273208,-4.2580546778  
 H,0,0.8039093523,2.3559138448,-3.825891861  
 H,0,0.7711277521,3.7089456728,-2.5688791825

### Cation- B3LYPGD2/6-31G\*/Gas- Conf2

/home/bibaswanbiswas/c8/Parentcalcs/gas/SMB3LYPGD2  
 gasSB  
 parent sm conf 2  
 B3LYP/6-31G\*  
 E(RB3LYP) = -519.469063285

Zero-point correction= 0.241552 (Hartree/Particle)  
 Thermal correction to Energy= 0.254302  
 Thermal correction to Enthalpy= 0.255247  
 Thermal correction to Gibbs Free Energy= 0.202380  
 Sum of electronic and ZPE= -519.227512  
 Sum of electronic and thermal Energies= -519.214761  
 Sum of electronic and thermal Enthalpies= -519.213817  
 Sum of electronic and thermal Free Energies= -519.266683

| E             | CV        | S         |
|---------------|-----------|-----------|
| KCal/Mol      | Cal/Mol-K | Cal/Mol-K |
| Total 159.577 | 46.829    | 111.267   |

C,0,2.0120125523,-0.795658184,-2.2551387652  
 O,0,2.7660835457,0.4423961786,-2.4085147979  
 C,0,2.7805059796,0.9723774595,-3.6214478802  
 O,0,2.2223442461,0.5353866401,-4.6051757308  
 C,0,3.629536459,2.2451117016,-3.5723325053  
 N,0,3.7243172827,2.9931565026,-4.8781997381  
 C,0,4.4355366868,2.164726503,-5.9176363181  
 C,0,4.5253941253,4.2413702177,-4.6212595586  
 C,0,2.3334138209,3.3949467721,-5.4314836681  
 C,0,1.4667659089,4.0598441364,-4.4082461922  
 C,0,1.2145591692,5.3707201481,-4.4161492273  
 H,0,2.1250810206,-1.065377556,-1.2058834009  
 H,0,0.9645973227,-0.6186678448,-2.5111421068  
 H,0,2.4321578927,-1.5614798409,-2.9115863339  
 H,0,4.6490988739,1.9911570342,-3.2683822414  
 H,0,3.2137381728,2.9291006616,-2.8288961489  
 H,0,3.857168671,1.2584547265,-6.0903821455  
 H,0,4.5055751575,2.7606471781,-6.8299442196  
 H,0,5.4349374075,1.929918175,-5.5436037466  
 H,0,5.493663564,3.9555702056,-4.2048265746  
 H,0,4.6614570664,4.7590423601,-5.5728805917  
 H,0,3.9702137735,4.8702982072,-3.9238561587  
 H,0,2.5529339766,4.0596256108,-6.2710861051  
 H,0,1.8926135173,2.4667009538,-5.7944006229  
 H,0,0.9922163053,3.4134335677,-3.67258706  
 H,0,1.6487203239,6.0300416977,-5.1660294403  
 H,0,0.5443891776,5.8244747876,-3.6912517215

**TS- B3LYPGD2/6-31G\*/Gas**

/home/bibaswanbiswas/c8/Parentcalcs/gas/TSB3LYPGD2g  
asSB

parent ts exo s-cis  
B3LYP/6-31G\*  
E(RB3LYP) = -519.013995617

Zero-point correction= 0.224309 (Hartree/Particle)  
Thermal correction to Energy= 0.236757  
Thermal correction to Enthalpy= 0.237702  
Thermal correction to Gibbs Free Energy= 0.186590  
Sum of electronic and ZPE= -518.789686  
Sum of electronic and thermal Energies= -518.777238  
Sum of electronic and thermal Enthalpies= -518.776294  
Sum of electronic and thermal Free Energies= -518.827405

| E             | CV        | S         |
|---------------|-----------|-----------|
| KCal/Mol      | Cal/Mol-K | Cal/Mol-K |
| Total 148.568 | 46.386    | 107.573   |

C,0,1.968310092,-0.8109111111,-2.425166266  
O,0,2.7409934651,0.3892709681,-2.4832019702  
C,0,2.8217528981,0.9561725669,-3.7296063155  
C,0,3.5403315374,2.1853934614,-3.6909183361  
N,0,3.8288211149,2.8880237222,-4.8514167211  
C,0,4.6343896871,4.0901946489,-4.5844726125  
O,0,2.2885725718,0.4354416434,-4.7162031972  
C,0,4.3587890581,2.1225294781,-6.0013669114  
C,0,2.1130234799,3.6881080094,-5.6684033134  
C,0,1.5220204607,4.2300425766,-4.5057667756  
C,0,1.0303953882,3.3928050458,-3.5460792146  
H,0,2.003336823,-1.1333925891,-1.3814175982  
H,0,0.9324967276,-0.62724625,-2.7337884803  
H,0,2.3905506298,-1.5820013809,-3.0793384586  
H,0,3.8159147133,2.6312645644,-2.7472902076  
H,0,5.386304037,1.8049971112,-5.7826725392  
H,0,3.7203565928,1.2544957804,-6.1592115806  
H,0,4.3485855006,2.7730448915,-6.8816467222  
H,0,5.6141279136,3.8009410622,-4.1831313794  
H,0,4.7621929051,4.6485066667,-5.5154417384  
H,0,4.1021008337,4.7067489124,-3.8559080086  
H,0,2.5101548702,4.3413679984,-6.4426476188  
H,0,1.7801858552,2.7076315302,-5.9994403179  
H,0,1.685951876,5.2820702843,-4.2734467772  
H,0,0.785190152,2.3649409519,-3.789143672  
H,0,0.729404817,3.7570204567,-2.5669132673

**Cation- PBEPBEGD2/6-31G\*/Gas- Conf2**

/home/bibaswanbiswas/c8/Parentcalcs/gas/SMPBEPBEGD  
2gasSB

parent sm conf 2  
PBEPBE/6-31G\*  
E(RPBE-PBE) = -518.800218864

Zero-point correction= 0.234765 (Hartree/Particle)  
Thermal correction to Energy= 0.247834  
Thermal correction to Enthalpy= 0.248779  
Thermal correction to Gibbs Free Energy= 0.195258  
Sum of electronic and ZPE= -518.565454  
Sum of electronic and thermal Energies= -518.552384

Sum of electronic and thermal Enthalpies= -518.551440  
Sum of electronic and thermal Free Energies= -518.604961

| E             | CV        | S         |
|---------------|-----------|-----------|
| KCal/Mol      | Cal/Mol-K | Cal/Mol-K |
| Total 155.518 | 48.181    | 112.644   |

C,0,2.0073738919,-0.8046730628,-2.2613028956  
O,0,2.760987967,0.4412790062,-2.3952965637  
C,0,2.7887544964,0.9634314176,-3.6231387302  
O,0,2.2423855586,0.5098664036,-4.6190996397  
C,0,3.6362625114,2.242466652,-3.5675058886  
N,0,3.7281321409,2.9931885727,-4.8759949344  
C,0,4.4352785081,2.164416207,-5.9202870541  
C,0,4.5250466868,4.2462520182,-4.6215634262  
C,0,2.3260454423,3.3893468236,-5.4191979557  
C,0,1.4721297477,4.0717876803,-4.3961061523  
C,0,1.2152475222,5.3908575164,-4.4247729182  
H,0,2.1063945331,-1.080900631,-1.2041060605  
H,0,0.9549209018,-0.6315676601,-2.5341776958  
H,0,2.4423173702,-1.5723970436,-2.9196748633  
H,0,4.6656079508,1.9926397206,-3.26087614  
H,0,3.2164827748,2.9331956172,-2.8188017728  
H,0,3.8548310831,1.2471351737,-6.0837600916  
H,0,4.4940248537,2.7606814853,-6.8429197645  
H,0,5.4472221215,1.9344615092,-5.5532036288  
H,0,5.5011353136,3.9645895391,-4.1991311107  
H,0,4.6625823626,4.7658066472,-5.5815290999  
H,0,3.9613420345,4.8813424071,-3.9226862016  
H,0,2.5380807458,4.0439614349,-6.2801806175  
H,0,1.8809954398,2.4442358209,-5.7633404146  
H,0,0.9980268613,3.4343365801,-3.6393963604  
H,0,1.6421081092,6.0423486239,-5.1973602959  
H,0,0.5453150705,5.8592295404,-3.6969127237

**TS- PBEPBEGD2/6-31G\*/Gas**

/home/bibaswanbiswas/c8/Parentcalcs/gas/TSPBEPBEGD2  
gasSB

parent ts exo s-cis  
PBEPBE/6-31G\*  
E(RPBE-PBE) = -518.358258699

Zero-point correction= 0.218331 (Hartree/Particle)  
Thermal correction to Energy= 0.231054  
Thermal correction to Enthalpy= 0.231999  
Thermal correction to Gibbs Free Energy= 0.180342  
Sum of electronic and ZPE= -518.139928  
Sum of electronic and thermal Energies= -518.127204  
Sum of electronic and thermal Enthalpies= -518.126260  
Sum of electronic and thermal Free Energies= -518.177917

| E             | CV        | S         |
|---------------|-----------|-----------|
| KCal/Mol      | Cal/Mol-K | Cal/Mol-K |
| Total 144.989 | 47.587    | 108.720   |

C,0,1.9656135653,-0.8300421215,-2.4518385062  
O,0,2.756856815,0.3653123498,-2.4809800332  
C,0,2.8360280592,0.9470999469,-3.7344072178  
C,0,3.5770563543,2.165946513,-3.6878333077  
N,0,3.8168888188,2.895107686,-4.8577710727

C,0,4.6184309905,4.1062358742,-4.5873970733  
 O,0,2.2869551665,0.4365712247,-4.7316916538  
 C,0,4.3665863547,2.1276279199,-6.0047584715  
 C,0,2.1537260072,3.629318623,-5.6359764469  
 C,0,1.5312642697,4.240530165,-4.5069493337  
 C,0,1.0076880224,3.455190891,-3.5158379578  
 H,0,2.0042902035,-1.1826261622,-1.4096642636  
 H,0,0.9212835331,-0.625981061,-2.7501079854  
 H,0,2.3734337437,-1.5959894161,-3.1350878524  
 H,0,3.8253921343,2.6379323855,-2.7393873936  
 H,0,5.4056158139,1.8319217615,-5.776052695  
 H,0,3.7360803042,1.2385372945,-6.1452211687  
 H,0,4.341753624,2.7703378219,-6.9006025241  
 H,0,5.6050555879,3.8150254095,-4.1851691282  
 H,0,4.7414729868,4.6725299896,-5.5237474026  
 H,0,4.0768622306,4.7180702229,-3.8493651884  
 H,0,2.527728158,4.254253635,-6.457186469  
 H,0,1.788933156,2.6375721298,-5.9312837613  
 H,0,1.6809875476,5.3145667151,-4.3333786612  
 H,0,0.7933816884,2.399265173,-3.7027561778  
 H,0,0.6748888647,3.8731460291,-2.5595882538

### Cation- BLYPGD2/6-31G\*/Gas-Conf2

/home/bibaswanbiswas/c8/Parentcalcs/gas/SMBLYPGD2g  
 asSB

parent sm conf 2  
 BLYP/6-31G\*  
 E(RB-LYP) = -519.246526000

Zero-point correction= 0.233764 (Hartree/Particle)  
 Thermal correction to Energy= 0.246919  
 Thermal correction to Enthalpy= 0.247863  
 Thermal correction to Gibbs Free Energy= 0.194107  
 Sum of electronic and ZPE= -519.012762  
 Sum of electronic and thermal Energies= -518.999607  
 Sum of electronic and thermal Enthalpies= -518.998663  
 Sum of electronic and thermal Free Energies= -519.052419

| E             | CV        | S         |
|---------------|-----------|-----------|
| KCal/Mol      | Cal/Mol-K | Cal/Mol-K |
| Total 154.944 | 48.505    | 113.139   |

C,0,2.0020733179,-0.8342278411,-2.2399661743  
 O,0,2.7642518002,0.4241074837,-2.3873351283  
 C,0,2.781192391,0.9542301473,-3.6191664494  
 O,0,2.2239891854,0.5077753807,-4.6154117603  
 C,0,3.6358800055,2.2398941888,-3.5612457205  
 N,0,3.732166468,2.9973940987,-4.8812135516  
 C,0,4.4484508407,2.1613744333,-5.9334759605  
 C,0,4.537689949,4.2604126701,-4.6222111149  
 C,0,2.3163266975,3.4029166335,-5.4383755511  
 C,0,1.4556417791,4.0799053239,-4.4081271361  
 C,0,1.2066295076,5.4023766198,-4.4223047193  
 H,0,2.1143523456,-1.1025611498,-1.1824998333  
 H,0,0.9492277009,-0.6551338239,-2.5046211844  
 H,0,2.4332152568,-1.5999431009,-2.9020503237  
 H,0,4.6644399409,1.9906714225,-3.2576124556  
 H,0,3.2130919865,2.9318050572,-2.8184836948  
 H,0,3.8632287764,1.2498763243,-6.1007111865  
 H,0,4.5133311527,2.7642593631,-6.8502929563

H,0,5.4551494398,1.9282302242,-5.5565099571  
 H,0,5.5111223927,3.9721984874,-4.2004062992  
 H,0,4.6730100294,4.777219739,-5.5827925081  
 H,0,3.9720352653,4.8905240419,-3.9228314938  
 H,0,2.5412099687,4.064046856,-6.2887897274  
 H,0,1.8789735008,2.4600941747,-5.7897161882  
 H,0,0.9836167839,3.4347541866,-3.65905253  
 H,0,1.6399543994,6.0583356536,-5.1861555425  
 H,0,0.5387811178,5.8667814051,-3.6909638532

### TS- BLYPGD2/6-31G\*/Gas

/home/bibaswanbiswas/c8/Parentcalcs/gas/TSBLYPGD2ga  
 sSB

parent ts exo s-cis  
 BLYP/6-31G\*  
 E(RB-LYP) = -518.802483883

Zero-point correction= 0.217751 (Hartree/Particle)  
 Thermal correction to Energy= 0.230467  
 Thermal correction to Enthalpy= 0.231411  
 Thermal correction to Gibbs Free Energy= 0.179669  
 Sum of electronic and ZPE= -518.584733  
 Sum of electronic and thermal Energies= -518.572017  
 Sum of electronic and thermal Enthalpies= -518.571073  
 Sum of electronic and thermal Free Energies= -518.622815

| E             | CV        | S         |
|---------------|-----------|-----------|
| KCal/Mol      | Cal/Mol-K | Cal/Mol-K |
| Total 144.620 | 47.562    | 108.901   |

C,0,1.9526796919,-0.8589732551,-2.4611378494  
 O,0,2.7669889982,0.334230627,-2.4850139691  
 C,0,2.8530930814,0.9381958996,-3.7433024552  
 C,0,3.6487427001,2.1160139839,-3.6947519963  
 N,0,3.8050882369,2.9012980677,-4.8753423121  
 C,0,4.6114762734,4.1273889928,-4.5899498741  
 O,0,2.2663247113,0.4555567391,-4.742185424  
 C,0,4.393806834,2.1486312149,-6.0394217975  
 C,0,2.2047178956,3.5436870819,-5.5775384101  
 C,0,1.5330923785,4.2399043554,-4.4960265774  
 C,0,0.9444332011,3.5377702343,-3.4885042566  
 H,0,1.9931115995,-1.2185237057,-1.4211803794  
 H,0,0.9103510171,-0.6374822461,-2.7529523497  
 H,0,2.3477279189,-1.6245128677,-3.1521774969  
 H,0,3.876080684,2.6051140883,-2.7514354819  
 H,0,5.4294441001,1.8715464375,-5.7856775497  
 H,0,3.7778300748,1.2538154634,-6.1920859799  
 H,0,4.3721686366,2.8028856662,-6.9266314472  
 H,0,5.6038255981,3.8233865008,-4.2189984477  
 H,0,4.7060737671,4.7140695379,-5.5162516485  
 H,0,4.0806993149,4.7100247171,-3.8233231656  
 H,0,2.5389764639,4.1358999744,-6.4389646446  
 H,0,1.7976695041,2.5599865041,-5.8368379737  
 H,0,1.6608799668,5.3260134762,-4.4101658887  
 H,0,0.7916861932,2.4601469888,-3.5787179168  
 H,0,0.5472851585,4.0313865234,-2.5954647077



**Cation- BP86GD2/6-31G\*/Gas- Conf2**

/home/bibaswanbiswas/c8/Parentcalcs/gas/SMBP86GD2gas  
sSB

parent sm conf 2  
BP86/6-31G\*  
E(RB-P86) = -519.455853943

Zero-point correction= 0.233913 (Hartree/Particle)  
Thermal correction to Energy= 0.246996  
Thermal correction to Enthalpy= 0.247940  
Thermal correction to Gibbs Free Energy= 0.194389  
Sum of electronic and ZPE= -519.221941  
Sum of electronic and thermal Energies= -519.208858  
Sum of electronic and thermal Enthalpies= -519.207914  
Sum of electronic and thermal Free Energies= -519.261465

| E             | CV        | S         |
|---------------|-----------|-----------|
| KCal/Mol      | Cal/Mol-K | Cal/Mol-K |
| Total 154.992 | 48.284    | 112.707   |

C,0,2.0052877382,-0.8108729891,-2.2580323634  
O,0,2.759767265,0.4408860792,-2.3929050776  
C,0,2.7870508145,0.963275588,-3.6224776026  
O,0,2.2410504503,0.5086667685,-4.6196073905  
C,0,3.6342563584,2.2454910787,-3.5658547032  
N,0,3.7268865988,2.9940615434,-4.8784479222  
C,0,4.4387653046,2.1630784333,-5.9218692857  
C,0,4.5221022187,4.2518850204,-4.6248239011  
C,0,2.3221599071,3.3877557774,-5.4256407806  
C,0,1.4692484632,4.0687145083,-4.3975007103  
C,0,1.2239396362,5.3912811836,-4.4183606513  
H,0,2.1027522685,-1.0828806386,-1.1985684166  
H,0,0.9532480359,-0.6376842882,-2.5361737032  
H,0,2.4464032973,-1.5776627219,-2.9149821863  
H,0,4.6648125326,1.9984366321,-3.2583338232  
H,0,3.2095894448,2.9388175666,-2.8211149649  
H,0,3.8565446359,1.2458606874,-6.0852377038  
H,0,4.4991934272,2.7614895771,-6.8442786698  
H,0,5.4499369284,1.9343185557,-5.5487895232  
H,0,5.4987608129,3.9706382273,-4.2006819172  
H,0,4.6576204356,4.7687387546,-5.5876769622  
H,0,3.9531200682,4.8851282919,-3.9269586044  
H,0,2.5363376489,4.0449890449,-6.2852561675  
H,0,1.8803409234,2.4404389789,-5.7695884901  
H,0,0.9941116707,3.4284894593,-3.6429946664  
H,0,1.6567739433,6.0416417252,-5.1899138871  
H,0,0.5589711713,5.862335185,-3.6862529259

**TS- BP86GD2/6-31G\*/Gas**

/home/bibaswanbiswas/c8/Parentcalcs/gas/TSBP86GD2gas  
SB

parent ts exo s-cis  
BP86/6-31G\*  
E(RB-P86) = -519.013386628

Zero-point correction= 0.217497 (Hartree/Particle)  
Thermal correction to Energy= 0.230215  
Thermal correction to Enthalpy= 0.231159  
Thermal correction to Gibbs Free Energy= 0.179558  
Sum of electronic and ZPE= -518.795890

Sum of electronic and thermal Energies= -518.783172  
Sum of electronic and thermal Enthalpies= -518.782227  
Sum of electronic and thermal Free Energies= -518.833828

| E             | CV        | S         |
|---------------|-----------|-----------|
| KCal/Mol      | Cal/Mol-K | Cal/Mol-K |
| Total 144.462 | 47.673    | 108.604   |

C,0,1.954864405,-0.8317341601,-2.4541109656  
O,0,2.7560388656,0.3622973541,-2.4800428328  
C,0,2.8361995055,0.9493221631,-3.733461069  
C,0,3.5858886904,2.1640218513,-3.684856936  
N,0,3.8220446112,2.8943605146,-4.856996344  
C,0,4.6159785945,4.1137786549,-4.5886062755  
O,0,2.2810020811,0.4455846899,-4.7327653771  
C,0,4.3744023315,2.1291577173,-6.0076786406  
C,0,2.1471019453,3.6201415957,-5.6375820664  
C,0,1.5314486002,4.2375369696,-4.5067923282  
C,0,1.0162178615,3.4529020367,-3.5085854761  
H,0,1.9879759055,-1.1836728205,-1.4102936503  
H,0,0.9129098183,-0.6191119,-2.7581897804  
H,0,2.3630354803,-1.5993519578,-3.1370440852  
H,0,3.8331343691,2.6378719693,-2.7362335949  
H,0,5.4152995229,1.8353494488,-5.7789597345  
H,0,3.7432009572,1.239673389,-6.1495128046  
H,0,4.3462714373,2.7772049202,-6.9011338441  
H,0,5.6057324949,3.8298158077,-4.185325984  
H,0,4.7327720414,4.6779830602,-5.5283808731  
H,0,4.0664783731,4.7218600583,-3.8515440292  
H,0,2.5222725864,4.2394970331,-6.4635662267  
H,0,1.7880696945,2.62175879,-5.9202078688  
H,0,1.6825421245,5.3130679744,-4.3382709419  
H,0,0.8037976263,2.395676698,-3.6941304596  
H,0,0.6895740767,3.8724691426,-2.5497645207

**Cation- B3LYPGD3/6-31G\*/Gas-Conf2**

/home/bibaswanbiswas/c8/Parentcalcs/gas/SMB3LYPGD3  
gasSB

parent sm conf 2  
B3LYP/6-31G\*  
E(RB3LYP) = -519.456328353

Zero-point correction= 0.242189 (Hartree/Particle)  
Thermal correction to Energy= 0.254978  
Thermal correction to Enthalpy= 0.255922  
Thermal correction to Gibbs Free Energy= 0.202923  
Sum of electronic and ZPE= -519.214139  
Sum of electronic and thermal Energies= -519.201351  
Sum of electronic and thermal Enthalpies= -519.200406  
Sum of electronic and thermal Free Energies= -519.253405

| E             | CV        | S         |
|---------------|-----------|-----------|
| KCal/Mol      | Cal/Mol-K | Cal/Mol-K |
| Total 160.001 | 46.841    | 111.545   |

C,0,1.9956002557,-0.7824858409,-2.2507694813  
O,0,2.7598802421,0.4486715626,-2.4066987088  
C,0,2.7817240827,0.9776737163,-3.6203144884  
O,0,2.2214690534,0.544739125,-4.6045627973  
C,0,3.6432231698,2.2417888666,-3.5739962916

N,0,3.7372452635,2.9951502333,-4.8814621022  
 C,0,4.4441603345,2.1617566452,-5.926162202  
 C,0,4.5434551802,4.2447796764,-4.6247560875  
 C,0,2.338923547,3.4007123817,-5.432556237  
 C,0,1.4583823837,4.0489398175,-4.4097933162  
 C,0,1.1872997804,5.3564216695,-4.4012529242  
 H,0,2.1049787198,-1.0504588944,-1.2017931393  
 H,0,0.9495800028,-0.6011593733,-2.5054016295  
 H,0,2.4078989974,-1.5561582893,-2.9013784132  
 H,0,4.6589579508,1.971783428,-3.2727231864  
 H,0,3.2429703496,2.9225050407,-2.820188564  
 H,0,3.8770490418,1.2472235017,-6.0868884859  
 H,0,4.4996849036,2.7429269655,-6.847805854  
 H,0,5.4510190909,1.9357862858,-5.569932307  
 H,0,5.5087737232,3.9652311322,-4.1997367269  
 H,0,4.6928574366,4.7625824035,-5.5732653534  
 H,0,3.9924012616,4.8836300754,-3.9344944919  
 H,0,2.553412571,4.0712662369,-6.2679473906  
 H,0,1.9011007292,2.4768813679,-5.8083005325  
 H,0,0.97746107,3.388602294,-3.6906326486  
 H,0,1.6176005796,6.0394991754,-5.1309260036  
 H,0,0.5019222788,5.7890287966,-3.678583637

### TS- B3LYPGD3/6-31G\*/Gas

/home/bibaswanbiswas/c8/Parentcalcs/gas/TSB3LYPGD3g  
 asSB

parent ts exo s-cis  
 B3LYP/6-31G\*  
 E(RB3LYP) = -519.003002963

Zero-point correction= 0.225100 (Hartree/Particle)  
 Thermal correction to Energy= 0.237522  
 Thermal correction to Enthalpy= 0.238467  
 Thermal correction to Gibbs Free Energy= 0.187365  
 Sum of electronic and ZPE= -518.777903  
 Sum of electronic and thermal Energies= -518.765481  
 Sum of electronic and thermal Enthalpies= -518.764536  
 Sum of electronic and thermal Free Energies= -518.815638

| E             | CV        | S         |
|---------------|-----------|-----------|
| KCal/Mol      | Cal/Mol-K | Cal/Mol-K |
| Total 149.048 | 46.265    | 107.553   |

C,0,1.9734601032,-0.8146708279,-2.4318504227  
 O,0,2.7518366146,0.3812562479,-2.4883390538  
 C,0,2.831870372,0.9560898236,-3.7329369335  
 C,0,3.5638621201,2.1749037102,-3.6937655888  
 N,0,3.8310529442,2.8920096087,-4.8560740662  
 C,0,4.6478431771,4.0905662383,-4.5851561224  
 O,0,2.2889094235,0.4429682352,-4.7194483523  
 C,0,4.3641262834,2.1210010882,-6.0061707231  
 C,0,2.1249105065,3.6734867924,-5.6516724745  
 C,0,1.5095573482,4.2278136493,-4.5003028837  
 C,0,0.9875756196,3.4165243124,-3.5391365312  
 H,0,2.0128128183,-1.143150745,-1.3911547655  
 H,0,0.9358558153,-0.6282449772,-2.7298464793  
 H,0,2.384812211,-1.5876275607,-3.0893459372  
 H,0,3.8300305003,2.6239106454,-2.7494434989  
 H,0,5.390090831,1.8049233491,-5.7856222582  
 H,0,3.7313871849,1.2494479964,-6.160368252

H,0,4.3562369613,2.7586856615,-6.8945024997  
 H,0,5.6268730086,3.7942155431,-4.1910989585  
 H,0,4.7790107593,4.6580355829,-5.5088136798  
 H,0,4.1300700709,4.7093064578,-3.8497928252  
 H,0,2.498500898,4.3293171702,-6.4354381846  
 H,0,1.7821262759,2.6988845269,-5.9877493937  
 H,0,1.6589366001,5.2861622412,-4.2872404671  
 H,0,0.7621216305,2.3775069698,-3.7505356307  
 H,0,0.6603839221,3.8041392606,-2.578234017

### Cation- M06GD3/6-31G\*/Gas-Conf2

/home/bibaswanbiswas/c8/Parentcalcs/gas/SMM06GD3gas  
 SB

parent sm conf 2  
 M06/6-31G\*  
 E(RM06) = -519.081480703

Zero-point correction= 0.240007 (Hartree/Particle)  
 Thermal correction to Energy= 0.252846  
 Thermal correction to Enthalpy= 0.253791  
 Thermal correction to Gibbs Free Energy= 0.200825  
 Sum of electronic and ZPE= -518.841474  
 Sum of electronic and thermal Energies= -518.828634  
 Sum of electronic and thermal Enthalpies= -518.827690  
 Sum of electronic and thermal Free Energies= -518.880656

| E             | CV        | S         |
|---------------|-----------|-----------|
| KCal/Mol      | Cal/Mol-K | Cal/Mol-K |
| Total 158.664 | 47.167    | 111.477   |

C,0,2.0361820788,-0.7854522717,-2.2739412444  
 O,0,2.7905348192,0.4361442766,-2.4180171651  
 C,0,2.7780446864,0.9867111562,-3.6146648135  
 O,0,2.1984037178,0.5718387102,-4.5894133394  
 C,0,3.6217079359,2.2490073561,-3.5651365728  
 N,0,3.7182918776,2.9902114165,-4.8654198967  
 C,0,4.4192373124,2.1553270728,-5.8960687886  
 C,0,4.5274208366,4.2245459595,-4.615896273  
 C,0,2.3377224084,3.3999996821,-5.4222829188  
 C,0,1.4642520902,4.062588633,-4.4163432285  
 C,0,1.2078786099,5.3691732607,-4.4343866417  
 H,0,2.1976130711,-1.1071662424,-1.2457631988  
 H,0,0.9768723782,-0.589709812,-2.4607985926  
 H,0,2.4031355831,-1.534067122,-2.9811217369  
 H,0,4.642172494,1.9934343743,-3.2529064013  
 H,0,3.2135548253,2.9327789175,-2.8115602317  
 H,0,3.8473258059,1.2395170878,-6.0583847773  
 H,0,4.4809476475,2.7341835861,-6.8220555557  
 H,0,5.4268197798,1.9261598029,-5.535826205  
 H,0,5.4979660687,3.937873894,-4.2003427193  
 H,0,4.6714186361,4.7458881703,-5.5667218411  
 H,0,3.990094186,4.8690695574,-3.9148913293  
 H,0,2.5662825374,4.0658510402,-6.263623776  
 H,0,1.8936610379,2.4759486127,-5.8020997163  
 H,0,0.9652704916,3.4169644511,-3.6909719958  
 H,0,1.6542685677,6.0320656687,-5.1770404467  
 H,0,0.5219525162,5.8284307611,-3.7268871786

**TS- M06GD3/6-31G\*/Gas**

/home/bibaswanbiswas/c8/Parentcalcs/gas/TSM06GD3gas  
SB

parent ts exo s-cis  
M06/6-31G\*  
E(RM06) = -518.628058088

Zero-point correction= 0.223114 (Hartree/Particle)  
Thermal correction to Energy= 0.235669  
Thermal correction to Enthalpy= 0.236613  
Thermal correction to Gibbs Free Energy= 0.185271  
Sum of electronic and ZPE= -518.404944  
Sum of electronic and thermal Energies= -518.392389  
Sum of electronic and thermal Enthalpies= -518.391445  
Sum of electronic and thermal Free Energies= -518.442787

| E             | CV        | S         |
|---------------|-----------|-----------|
| KCal/Mol      | Cal/Mol-K | Cal/Mol-K |
| Total 147.884 | 46.719    | 108.058   |

C,0,1.9680973176,-0.7562911585,-2.3940205037  
O,0,2.7174962985,0.4404042769,-2.4762215963  
C,0,2.8276949231,0.9549171915,-3.7333229112  
C,0,3.491852852,2.2148792881,-3.7043735915  
N,0,3.8114920455,2.9000953347,-4.8625959103  
C,0,4.6526040606,4.0661389357,-4.592111598  
O,0,2.3549411054,0.3797123017,-4.7099201997  
C,0,4.3246075128,2.1221826146,-6.0002601979  
C,0,2.1181759487,3.7600939161,-5.6714219251  
C,0,1.5170923377,4.2087357998,-4.48608746  
C,0,1.0619163276,3.290028212,-3.5856106593  
H,0,1.991236352,-1.0564327926,-1.3431640282  
H,0,0.9308747905,-0.5966953514,-2.7160643061  
H,0,2.4016642004,-1.54402016,-3.0212089057  
H,0,3.7717356038,2.6590411094,-2.7561032367  
H,0,5.3503454323,1.7899970192,-5.7865451435  
H,0,3.6801840268,1.2546613037,-6.1530596878  
H,0,4.3242754684,2.7604446472,-6.8920388968  
H,0,5.6255226306,3.7444140858,-4.1941271785  
H,0,4.8043664949,4.6322867595,-5.5174291899  
H,0,4.153743541,4.7038530817,-3.8547466618  
H,0,2.5143593772,4.4673687305,-6.4021855995  
H,0,1.7905604582,2.8044361963,-6.0831934044  
H,0,1.6721895444,5.2433596187,-4.1712872794  
H,0,0.7942020592,2.2866721368,-3.9105967131  
H,0,0.7630232911,3.5671779026,-2.5763432155

**Cation- PBE1PBEGD3/6-31G\*/Gas- Conf2**

/home/bibaswanbiswas/c8/Parentcalcs/gas/SMPBE1PBEG  
D3gasSB

parent sm conf 2  
PBE1PBE/6-31G\*  
E(RPBE1PBE) = -518.839019773

Zero-point correction= 0.243689 (Hartree/Particle)  
Thermal correction to Energy= 0.256408  
Thermal correction to Enthalpy= 0.257352  
Thermal correction to Gibbs Free Energy= 0.204571  
Sum of electronic and ZPE= -518.595331  
Sum of electronic and thermal Energies= -518.582612

Sum of electronic and thermal Enthalpies= -518.581668  
Sum of electronic and thermal Free Energies= -518.634449

| E             | CV        | S         |
|---------------|-----------|-----------|
| KCal/Mol      | Cal/Mol-K | Cal/Mol-K |
| Total 160.898 | 46.506    | 111.087   |

C,0,2.0062944289,-0.7613827417,-2.2724209515  
O,0,2.7591869686,0.4618729034,-2.4155711566  
C,0,2.7894438218,0.9831321489,-3.6245625071  
O,0,2.2424930871,0.5427192163,-4.6082294921  
C,0,3.639323947,2.2456140433,-3.5784938179  
N,0,3.7285628498,2.9901989474,-4.8751266103  
C,0,4.4281817148,2.1649959744,-5.9112409728  
C,0,4.5261403328,4.2298446911,-4.6228436781  
C,0,2.3453531284,3.3869470817,-5.4142035333  
C,0,1.4770421226,4.047370064,-4.3961801678  
C,0,1.2030521139,5.3518984096,-4.4102217876  
H,0,2.1026128875,-1.0344641632,-1.2235956957  
H,0,0.9617243152,-0.5873344071,-2.5376504706  
H,0,2.4274868238,-1.5337859324,-2.9187264294  
H,0,4.6564794727,1.9808615047,-3.2742411179  
H,0,3.2359980144,2.9252831224,-2.8235117834  
H,0,3.8612164404,1.2495819795,-6.073614578  
H,0,4.4839168003,2.7457682949,-6.8335528545  
H,0,5.4361064794,1.9379015315,-5.5578487474  
H,0,5.4942067892,3.9532130586,-4.2012690505  
H,0,4.6725535,4.7496844659,-5.5712179065  
H,0,3.9770369578,4.869109256,-3.9301324301  
H,0,2.5501700892,4.0496537771,-6.2594259541  
H,0,1.8984949692,2.4610450907,-5.7790840972  
H,0,0.9979120617,3.4009069078,-3.6624820982  
H,0,1.625837531,6.0213338342,-5.1570135927  
H,0,0.5222043521,5.795348941,-3.6898615192

**TS- PBE1PBEGD3/6-31G\*/Gas**

/home/bibaswanbiswas/c8/Parentcalcs/gas/TSPBE1PBEGD  
3gasSB

parent ts exo s-cis  
PBE1PBE/6-31G\*  
E(RPBE1PBE) = -518.383597958

Zero-point correction= 0.226786 (Hartree/Particle)  
Thermal correction to Energy= 0.239069  
Thermal correction to Enthalpy= 0.240013  
Thermal correction to Gibbs Free Energy= 0.189232  
Sum of electronic and ZPE= -518.156812  
Sum of electronic and thermal Energies= -518.144529  
Sum of electronic and thermal Enthalpies= -518.143585  
Sum of electronic and thermal Free Energies= -518.194366

| E             | CV        | S         |
|---------------|-----------|-----------|
| KCal/Mol      | Cal/Mol-K | Cal/Mol-K |
| Total 150.018 | 45.789    | 106.878   |

C,0,2.0081444154,-0.8045555354,-2.4259872825  
O,0,2.727654208,0.4153097902,-2.4851389159  
C,0,2.7932890595,0.9704163051,-3.7270980651  
C,0,3.4554100645,2.2280760581,-3.6947838153  
N,0,3.7778938964,2.9067230744,-4.8612469822

C,0,4.6223056692,4.0712702873,-4.5841781788  
 O,0,2.2851027154,0.4226301634,-4.7063027994  
 C,0,4.3118423029,2.1093994506,-5.9768979334  
 C,0,2.1517551861,3.7245304755,-5.667366125  
 C,0,1.535305838,4.245536357,-4.5110590487  
 C,0,1.07490222,3.3666502165,-3.5745718316  
 H,0,2.0423354662,-1.1184127022,-1.3810333419  
 H,0,0.9693848366,-0.669632798,-2.7450846799  
 H,0,2.4657054038,-1.5668427202,-3.0645679535  
 H,0,3.7700038529,2.6561115044,-2.7546999488  
 H,0,5.3285150475,1.7780906158,-5.73713261  
 H,0,3.6653930813,1.2453380117,-6.1248994223  
 H,0,4.3298034978,2.7305614862,-6.8772786454  
 H,0,5.5793983516,3.7465819703,-4.1601064015  
 H,0,4.798489322,4.62327262054,-5.5103099162  
 H,0,4.1069812561,4.7166421555,-3.8694800175  
 H,0,2.5464346704,4.3950792987,-6.4297017377  
 H,0,1.7905774886,2.7688022718,-6.0427776918  
 H,0,1.7002368577,5.2888513992,-4.2444950745  
 H,0,0.7951948481,2.3575399549,-3.8590370028  
 H,0,0.7821944444,3.6894877038,-2.5788045783

### Cation1- wB97XD/6-31G\*/PCM-Conf1

/home/bibaswanbiswas/c8/Parentcalcs/b97family/23parent  
 SM1wB97XDSB  
 parent sm  
 wb97xd/6-31G\*  
 E(RwB97XD) = -519.349039668

Zero-point correction= 0.245416 (Hartree/Particle)  
 Thermal correction to Energy= 0.257894  
 Thermal correction to Enthalpy= 0.258839  
 Thermal correction to Gibbs Free Energy= 0.206853  
 Sum of electronic and ZPE= -519.103624  
 Sum of electronic and thermal Energies= -519.091145  
 Sum of electronic and thermal Enthalpies= -519.090201  
 Sum of electronic and thermal Free Energies= -519.142186

| E             | CV        | S         |
|---------------|-----------|-----------|
| KCal/Mol      | Cal/Mol-K | Cal/Mol-K |
| Total 161.831 | 46.030    | 109.412   |

C,0,1.9237085968,-0.7009911841,-2.2712416557  
 O,0,2.7085673332,0.4952306192,-2.4214923847  
 C,0,2.8061396053,0.9783279222,-3.6474467082  
 O,0,2.2917186597,0.495846093,-4.6309260638  
 C,0,3.6754462451,2.2254345317,-3.6033039181  
 N,0,3.7611743803,2.990802584,-4.8890243394  
 C,0,4.4754660646,2.1901266305,-5.9391171667  
 C,0,4.5565129968,4.2335136101,-4.6159653947  
 C,0,1.4906611062,4.0036861638,-4.4010772706  
 C,0,0.4054360219,3.387745163,-3.9368372433  
 C,0,2.380633248,3.3745411543,-5.4282565373  
 H,0,1.9827105981,-0.9531009281,-1.2149635608  
 H,0,0.8907043472,-0.5058868744,-2.5638679446  
 H,0,2.3401216038,-1.5020365205,-2.8837677637  
 H,0,4.6904796475,1.9394457793,-3.3181237434  
 H,0,5.4817143637,1.9674646524,-5.5843323304  
 H,0,3.919734502,1.2725777742,-6.1177851052

H,0,4.5251112857,2.7897304618,-6.8476511901  
 H,0,5.5391889023,3.9460949835,-4.2428930723  
 H,0,4.6594435649,4.7891968827,-5.5473289851  
 H,0,4.0399267517,4.8382874085,-3.8722122518  
 H,0,2.5802307889,4.0527080015,-6.2611005226  
 H,0,1.9425648701,2.4563234284,-5.8148981458  
 H,0,1.7305965328,5.0112693463,-4.0709339623  
 H,0,0.133577658,2.3872005751,-4.2645197922  
 H,0,-0.2532874758,3.8690135637,-3.2211862953  
 H,0,3.2845808013,2.893099178,-2.8347186519

### Cation3/wb97xd /6-31G \*/PCM-Conf3

/home/bibaswanbiswas/c8/Parentcalcs/b97family/23parent  
 SM3wB97XDSB  
 parent sm  
 wb97xd/6-31G\*  
 E(RwB97XD) = -519.347492531

Zero-point correction= 0.245361 (Hartree/Particle)  
 Thermal correction to Energy= 0.257882  
 Thermal correction to Enthalpy= 0.258826  
 Thermal correction to Gibbs Free Energy= 0.206739  
 Sum of electronic and ZPE= -519.102132  
 Sum of electronic and thermal Energies= -519.089611  
 Sum of electronic and thermal Enthalpies= -519.088667  
 Sum of electronic and thermal Free Energies= -519.140753

| E             | CV        | S         |
|---------------|-----------|-----------|
| KCal/Mol      | Cal/Mol-K | Cal/Mol-K |
| Total 161.823 | 46.032    | 109.625   |

C,0,1.840545096,-0.6285851552,-2.211902471  
 O,0,2.7078788401,0.4998145189,-2.4221271907  
 C,0,2.7821632562,0.9583173153,-3.6596763483  
 O,0,2.1787776926,0.5110340675,-4.6075668602  
 C,0,3.7670113997,2.1201761753,-3.674215779  
 N,0,3.8631137516,2.8680628286,-4.9682628563  
 C,0,4.4033853687,1.9888745483,-6.0573175161  
 C,0,2.5220292297,3.4091745521,-5.3724515476  
 C,0,4.7958656997,4.0667583194,-4.7680706143  
 C,0,6.1618983327,3.7121023219,-4.265276736  
 C,0,7.2366810194,3.7155484761,-5.0504435815  
 H,0,1.9210055669,-0.8570634331,-1.1516621644  
 H,0,0.8147790508,-0.3636387181,-2.4729061316  
 H,0,2.1731689801,-1.4741613791,-2.8159011911  
 H,0,4.7569711118,1.7258106805,-3.4360291158  
 H,0,3.4884980755,2.8304871614,-2.8929872687  
 H,0,3.7163150059,1.1590003225,-6.2021855108  
 H,0,4.4816256,2.5833740767,-6.9674254881  
 H,0,5.3882044118,1.630558635,-5.7611271974  
 H,0,2.1237605189,4.003141198,-4.549609873  
 H,0,2.6573444111,4.0361035134,-6.2532646092  
 H,0,1.8604395578,2.5769621726,-5.5987274538  
 H,0,4.84929848,4.555977974,-5.7423275854  
 H,0,4.2768913893,4.7308381598,-4.0727492777  
 H,0,6.2638844803,3.5009066149,-3.203885888  
 H,0,7.1712724523,3.947067107,-6.1108016402  
 H,0,8.222796221,3.4944441231,-4.6546011039

**Cation4wb97xd /6-31G \*/PCM-Conf4**

/home/bibaswanbiswas/c8/Parentcalcs/b97family/23parent  
SM4wB97XDSB

parent sm

wb97xd/6-31G\*

E(RwB97XD) = -519.344298249

Zero-point correction= 0.244933 (Hartree/Particle)  
Thermal correction to Energy= 0.257625  
Thermal correction to Enthalpy= 0.258569  
Thermal correction to Gibbs Free Energy= 0.205721  
Sum of electronic and ZPE= -519.099365  
Sum of electronic and thermal Energies= -519.086674  
Sum of electronic and thermal Enthalpies= -519.085729  
Sum of electronic and thermal Free Energies= -519.138577

| E             | CV        | S         |
|---------------|-----------|-----------|
| KCal/Mol      | Cal/Mol-K | Cal/Mol-K |
| Total 161.662 | 46.229    | 111.228   |

C,0,1.7464201509,-0.8957098538,-2.4876160473  
O,0,2.4918759703,0.3340159924,-2.4033943576  
C,0,2.7556024597,0.9391587238,-3.5520406776  
O,0,2.4093437436,0.5497820682,-4.6396957985  
C,0,3.5140627841,2.2560900964,-3.4348913183  
N,0,4.2431245201,2.5833843818,-2.162261507  
C,0,3.2892665687,2.8529279121,-1.0362258881  
C,0,5.1819698861,1.476200684,-1.7808853949  
C,0,5.0960457714,3.8337310888,-2.4104450655  
C,0,4.324819643,5.0197927501,-2.9018941523  
C,0,4.055138571,6.0667325495,-2.125439149  
H,0,1.6491917334,-1.2400621535,-1.4608630092  
H,0,0.7670148169,-0.70466481,-2.9278538095  
H,0,2.2952390408,-1.6199643007,-3.0907278798  
H,0,2.7911886859,3.054851687,-3.6153856472  
H,0,4.2422838102,2.2705445775,-4.2472879659  
H,0,2.6989643096,1.9587507894,-0.8561951498  
H,0,3.8723661006,3.1089091584,-0.1519830152  
H,0,2.6477470035,3.6880525426,-1.3136514177  
H,0,5.8191325627,1.2480260689,-2.6355037804  
H,0,5.7886680635,1.8163116549,-0.9423086483  
H,0,4.6017969719,0.6028112071,-1.4941030653  
H,0,5.5806765364,4.0460626011,-1.4556872039  
H,0,5.8600476406,3.5300204934,-3.1299925742  
H,0,4.0312969207,5.0275443871,-3.9485544901  
H,0,4.3581500591,6.0977193385,-1.0815514889  
H,0,3.5295196754,6.933579365,-2.5128564986

**CationB971/6-31G\*/PCM-Conf2**

/home/bibaswanbiswas/c8/Parentcalcs/b97family/23parent  
SM2B971SB

parent sm

b971/6-31G\*

E(RB971) = -519.341196575

Zero-point correction= 0.241515 (Hartree/Particle)  
Thermal correction to Energy= 0.254421  
Thermal correction to Enthalpy= 0.255365  
Thermal correction to Gibbs Free Energy= 0.202002  
Sum of electronic and ZPE= -519.099682

Sum of electronic and thermal Energies= -519.086775  
Sum of electronic and thermal Enthalpies= -519.085831  
Sum of electronic and thermal Free Energies= -519.139195

| E             | CV        | S         |
|---------------|-----------|-----------|
| KCal/Mol      | Cal/Mol-K | Cal/Mol-K |
| Total 159.652 | 47.113    | 112.313   |

C,0,2.0481997595,-0.8355963614,-2.263900018  
O,0,2.7941523524,0.3964101093,-2.4107127832  
C,0,2.7795414196,0.9488040728,-3.6188778442  
O,0,2.1972678847,0.5085253903,-4.589467928  
C,0,3.6206381908,2.2271585476,-3.566717081  
N,0,3.7151889278,2.9931654679,-4.8634080951  
C,0,4.4192398404,2.1704702681,-5.9165444907  
C,0,4.5350860199,4.2306443813,-4.5898832342  
C,0,2.3289463272,3.4097902687,-5.4097076538  
C,0,1.4700905054,4.1280598209,-4.4079619933  
C,0,1.1914761198,5.4339900459,-4.4942711652  
H,0,2.1794611951,-1.1247473466,-1.2212529619  
H,0,0.9927908593,-0.6614395289,-2.489554239  
H,0,2.4537946567,-1.5987344422,-2.933438732  
H,0,4.639980205,1.9673565834,-3.2641197353  
H,0,3.2095599299,2.89811029,-2.8068888959  
H,0,3.8358897258,1.2692818522,-6.1022374931  
H,0,4.496524302,2.7722056957,-6.8244701981  
H,0,5.4163623942,1.9185666315,-5.548453884  
H,0,5.505786144,3.9265564412,-4.1930140109  
H,0,4.6656293114,4.770646325,-5.5297645055  
H,0,4.0038313797,4.8532405099,-3.8682424628  
H,0,2.5453373661,4.0410192992,-6.2757834232  
H,0,1.8621936736,2.4808824008,-5.7438456452  
H,0,1.0115397452,3.5266982693,-3.6230343663  
H,0,1.6077059459,6.0605762007,-5.2821896778  
H,0,0.5228178187,5.9156768076,-3.7845804825

**TS B971/6-31G \*/PCM-**

/home/bibaswanbiswas/c8/Parentcalcs/b97family/23parent  
TSB971SB

23 parent ts

b971/6-31G\*

E(RB971) = -518.822074086

Zero-point correction= 0.223785 (Hartree/Particle)  
Thermal correction to Energy= 0.236477  
Thermal correction to Enthalpy= 0.237422  
Thermal correction to Gibbs Free Energy= 0.185598  
Sum of electronic and ZPE= -518.598289  
Sum of electronic and thermal Energies= -518.585597  
Sum of electronic and thermal Enthalpies= -518.584653  
Sum of electronic and thermal Free Energies= -518.636476

| E             | CV        | S         |
|---------------|-----------|-----------|
| KCal/Mol      | Cal/Mol-K | Cal/Mol-K |
| Total 148.392 | 46.819    | 109.072   |

C,0,2.0308067342,-0.8195092802,-2.3373156405  
O,0,2.7284035646,0.4215035118,-2.4541475247  
C,0,2.799840733,0.9354309965,-3.7274355177  
C,0,3.4429724765,2.2124303111,-3.7167152171

N,0,3.8000538586,2.8999576265,-4.8688369853  
 C,0,4.6828773078,4.0494947273,-4.5756156907  
 O,0,2.3256662866,0.3239756617,-4.6942404749  
 C,0,4.3015366393,2.1137359438,-6.0205865095  
 C,0,2.1327231281,3.8383212769,-5.6954797921  
 C,0,1.5032504573,4.2629573876,-4.5048138132  
 C,0,0.9908575714,3.3301394466,-3.6385841234  
 H,0,2.0723122913,-1.0823338952,-1.2772190766  
 H,0,0.9866177272,-0.7200756311,-2.6567756556  
 H,0,2.5092531967,-1.6027745859,-2.9363681829  
 H,0,3.719205138,2.6568519319,-2.7700237615  
 H,0,5.3098341742,1.7402343265,-5.7982344932  
 H,0,3.6273370924,1.2758595831,-6.1949825672  
 H,0,4.338622474,2.7651675025,-6.8990463535  
 H,0,5.6395459299,3.6930711414,-4.1722593737  
 H,0,4.8590721652,4.6125430353,-5.495757275  
 H,0,4.194245945,4.6952561816,-3.8410121573  
 H,0,2.5684712754,4.5640026709,-6.3809988723  
 H,0,1.7945428688,2.9118706983,-6.1568439202  
 H,0,1.6738657159,5.2825170552,-4.1553390285  
 H,0,0.7202699855,2.3375660041,-3.9891603157  
 H,0,0.6620692628,3.5992673715,-2.6362476778

### CationB972/6-31G\*/PCM-Conf2

/home/bibaswanbiswas/c8/Parentcalcs/b97family/23parent  
 SM2B972SB  
 parent sm  
 b972/6-31G\*  
 E(RB972) = -519.313755427

Zero-point correction= 0.243801 (Hartree/Particle)  
 Thermal correction to Energy= 0.256659  
 Thermal correction to Enthalpy= 0.257603  
 Thermal correction to Gibbs Free Energy= 0.204252  
 Sum of electronic and ZPE= -519.069955  
 Sum of electronic and thermal Energies= -519.057096  
 Sum of electronic and thermal Enthalpies= -519.056152  
 Sum of electronic and thermal Free Energies= -519.109504

| E        | CV        | S              |
|----------|-----------|----------------|
| KCal/Mol | Cal/Mol-K | Cal/Mol-K      |
| Total    | 161.056   | 46.762 112.288 |

C,0,2.0651958293,-0.8361186311,-2.2650402841  
 O,0,2.8024293002,0.3922849441,-2.4217434659  
 C,0,2.7767927358,0.9448394976,-3.6248086606  
 O,0,2.1899072107,0.50653375,-4.5878753458  
 C,0,3.6108389211,2.2178141732,-3.5737523304  
 N,0,3.7077103294,2.98987629,-4.8574913237  
 C,0,4.4081341543,2.1791104727,-5.9107523228  
 C,0,4.5271215855,4.216016881,-4.5746124078  
 C,0,2.3330446636,3.4140049375,-5.3998284107  
 C,0,1.4822507299,4.1445661142,-4.4114501747  
 C,0,1.1942486208,5.4419218368,-4.5209559793  
 H,0,2.2073158606,-1.1219111174,-1.226773732  
 H,0,1.0102560133,-0.6674601081,-2.4779241348  
 H,0,2.4645891172,-1.5981833357,-2.9332007961  
 H,0,4.626051375,1.9582338515,-3.2713952915  
 H,0,3.2033140535,2.8808593529,-2.8107843238  
 H,0,3.8225329675,1.2884792832,-6.1157288398

H,0,4.4992579616,2.7885839799,-6.8074603624  
 H,0,5.3966907745,1.9121309289,-5.5417994633  
 H,0,5.4967262782,3.9091743647,-4.1881652411  
 H,0,4.6535394981,4.7667927934,-5.5041378218  
 H,0,4.004659975,4.8299621815,-3.8452443399  
 H,0,2.551138876,4.0329658936,-6.2694790626  
 H,0,1.8568233778,2.4921001316,-5.7278745064  
 H,0,1.0305563358,3.5591049836,-3.6156550997  
 H,0,1.6013654551,6.0559564584,-5.3185418951  
 H,0,0.5265400001,5.9296780919,-3.8198473842

### TS B972/6-31G \*/ PCM-TS

/home/bibaswanbiswas/c8/Parentcalcs/b97family/23parent  
 TSB972SB  
 23 parent ts  
 b972/6-31G\*  
 E(RB972) = -518.792886842

Zero-point correction= 0.226030 (Hartree/Particle)  
 Thermal correction to Energy= 0.238612  
 Thermal correction to Enthalpy= 0.239556  
 Thermal correction to Gibbs Free Energy= 0.187975  
 Sum of electronic and ZPE= -518.566857  
 Sum of electronic and thermal Energies= -518.554275  
 Sum of electronic and thermal Enthalpies= -518.553331  
 Sum of electronic and thermal Free Energies= -518.604911

| E        | CV        | S              |
|----------|-----------|----------------|
| KCal/Mol | Cal/Mol-K | Cal/Mol-K      |
| Total    | 149.731   | 46.437 108.561 |

C,0,2.0531245275,-0.8163374453,-2.330327741  
 O,0,2.7280617697,0.4286151403,-2.4587459408  
 C,0,2.8009378682,0.9303098773,-3.7322155494  
 C,0,3.432212062,2.2066113043,-3.7261546257  
 N,0,3.7921655312,2.8952948378,-4.8691799346  
 C,0,4.6815195245,4.0286144516,-4.5699852242  
 O,0,2.342107168,0.3057175689,-4.6921930626  
 C,0,4.2870482675,2.1164629314,-6.0185931503  
 C,0,2.1410185584,3.8514128437,-5.6906697105  
 C,0,1.5076205674,4.2697029086,-4.5059099668  
 C,0,0.9730450606,3.343150142,-3.656188388  
 H,0,2.0941448915,-1.0656872963,-1.2707341928  
 H,0,1.0118013143,-0.7393701695,-2.6520958049  
 H,0,2.5445462201,-1.5974960701,-2.914472787  
 H,0,3.6952374132,2.6544132652,-2.7812614041  
 H,0,5.283710975,1.7251013202,-5.7937493325  
 H,0,3.6062207582,1.2927661779,-6.2085779045  
 H,0,4.3424560936,2.7717094029,-6.8882504403  
 H,0,5.6333328521,3.662024604,-4.1748120798  
 H,0,4.860528935,4.5981195718,-5.4809465174  
 H,0,4.2055898094,4.6707589586,-3.8299724669  
 H,0,2.582435606,4.5789085749,-6.3649509579  
 H,0,1.7958648061,2.938115423,-6.1641078362  
 H,0,1.6819478687,5.2823755292,-4.1492412784  
 H,0,0.7008379894,2.3565360356,-4.0113952767  
 H,0,0.6367375625,3.6096311116,-2.6593084264

**Cation B97D/6-31G\*/PCM-Conf2**

/home/bibaswanbiswas/c8/Parentcalcs/b97family/23parent  
SM2B97DSB

parent sm  
b97d/6-31G\*  
E(RB97D) = -519.163158799

Zero-point correction= 0.236252 (Hartree/Particle)  
Thermal correction to Energy= 0.249247  
Thermal correction to Enthalpy= 0.250192  
Thermal correction to Gibbs Free Energy= 0.196526  
Sum of electronic and ZPE= -518.926907  
Sum of electronic and thermal Energies= -518.913911  
Sum of electronic and thermal Enthalpies= -518.912967  
Sum of electronic and thermal Free Energies= -518.966633

| E             | CV        | S         |
|---------------|-----------|-----------|
| KCal/Mol      | Cal/Mol-K | Cal/Mol-K |
| Total 156.405 | 47.862    | 112.949   |

C,0,2.0226896537,-0.8189659294,-2.232896756  
O,0,2.7826617643,0.4187469055,-2.3989550608  
C,0,2.7720819106,0.9522320877,-3.6271450243  
O,0,2.1890576655,0.4982150426,-4.5986125614  
C,0,3.6212722947,2.2298140395,-3.5791068391  
N,0,3.7213592309,2.9946477193,-4.8827559862  
C,0,4.4420133063,2.1747989724,-5.9334515999  
C,0,4.5298426899,4.2448405865,-4.602845122  
C,0,2.3277114638,3.4090732118,-5.4432601055  
C,0,1.4565817842,4.0809353604,-4.4230819506  
C,0,1.2092247484,5.4002012961,-4.4380052937  
H,0,2.1558105488,-1.0899046477,-1.1811933283  
H,0,0.9657883604,-0.6357788962,-2.4660425637  
H,0,2.4285731734,-1.5923332608,-2.8978371229  
H,0,4.6452406709,1.9744700848,-3.2788447944  
H,0,3.2064907621,2.9137349004,-2.8288807629  
H,0,3.8572327409,1.2717922886,-6.1242758062  
H,0,4.5214435438,2.7878332387,-6.8379771462  
H,0,5.4373935544,1.9291513874,-5.5464613698  
H,0,5.5033606803,3.9417602959,-4.2024751081  
H,0,4.6515726807,4.7831342334,-5.548624205  
H,0,3.9791040324,4.8551473933,-3.8800635634  
H,0,2.5593576474,4.0713299593,-6.2859277931  
H,0,1.8833156635,2.4785600435,-5.809008981  
H,0,0.9845327131,3.4393645034,-3.6751012195  
H,0,1.6545753767,6.0547436297,-5.1917924847  
H,0,0.5407433385,5.8597735539,-3.7077004514

**TS B97D/6-31G\*/PCM-TS**

/home/bibaswanbiswas/c8/Parentcalcs/b97family/23parent  
TSB97DSB

23 parent ts  
b97d/6-31G\*  
E(RB97D) = -518.652802726

Zero-point correction= 0.218558 (Hartree/Particle)  
Thermal correction to Energy= 0.231416  
Thermal correction to Enthalpy= 0.232361  
Thermal correction to Gibbs Free Energy= 0.180264  
Sum of electronic and ZPE= -518.434244

Sum of electronic and thermal Energies= -518.421386  
Sum of electronic and thermal Enthalpies= -518.420442  
Sum of electronic and thermal Free Energies= -518.472538

| E             | CV        | S         |
|---------------|-----------|-----------|
| KCal/Mol      | Cal/Mol-K | Cal/Mol-K |
| Total 145.216 | 47.762    | 109.645   |

C,0,1.9690473826,-0.8287584544,-2.3837629976  
O,0,2.7700282427,0.3621798328,-2.4771141184  
C,0,2.8427714347,0.9213842748,-3.7510720594  
C,0,3.5882247362,2.1351933919,-3.7165196333  
N,0,3.8407480504,2.8841964158,-4.868240979  
C,0,4.6528136075,4.0933533276,-4.5759207522  
O,0,2.2959764435,0.3796533377,-4.7320560102  
C,0,4.3832840242,2.1489071815,-6.045268765  
C,0,2.1288423127,3.6796445196,-5.6524473203  
C,0,1.5071890389,4.2387651013,-4.4983175173  
C,0,0.9347301001,3.4321316129,-3.5525354591  
H,0,2.0227493005,-1.1361059781,-1.3313458945  
H,0,0.9235478976,-0.6271257605,-2.6673315466  
H,0,2.3629046443,-1.6257172402,-3.0339025933  
H,0,3.8247909967,2.6018700784,-2.7659589481  
H,0,5.4150044652,1.8343634315,-5.8240914932  
H,0,3.7496024572,1.2776657011,-6.2296968745  
H,0,4.3726223535,2.8253692852,-6.9102192762  
H,0,5.6438689499,3.787872144,-4.2065239384  
H,0,4.7563040224,4.6809743403,-5.4959781601  
H,0,4.1319293395,4.6838080944,-3.8123080672  
H,0,2.535669056,4.3351580849,-6.4256242567  
H,0,1.7778046422,2.7042808362,-5.9953600201  
H,0,1.6752533863,5.2971613267,-4.2757942572  
H,0,0.7213379065,2.385807867,-3.7722870295  
H,0,0.5872092086,3.8254282475,-2.5943620324

**Cation B97D/6-31+G\*\*/PCM-Conf2**

/home/bibaswanbiswas/c8/Parentcalcs/b97family/23parent  
SM2B97DSS

parent sm  
b97d/6-31+G\*\*  
E(RB97D) = -519.197401760

Zero-point correction= 0.235116 (Hartree/Particle)  
Thermal correction to Energy= 0.248095  
Thermal correction to Enthalpy= 0.249039  
Thermal correction to Gibbs Free Energy= 0.195683  
Sum of electronic and ZPE= -518.962286  
Sum of electronic and thermal Energies= -518.949307  
Sum of electronic and thermal Enthalpies= -518.948363  
Sum of electronic and thermal Free Energies= -519.001719

| E             | CV        | S         |
|---------------|-----------|-----------|
| KCal/Mol      | Cal/Mol-K | Cal/Mol-K |
| Total 155.682 | 48.081    | 112.297   |

C,0,2.0076945986,-0.8205454672,-2.2221865418  
O,0,2.7631441439,0.4233686939,-2.3949424763  
C,0,2.783621811,0.9417091154,-3.6306834428  
O,0,2.2265966381,0.4701339888,-4.6107363015  
C,0,3.6310018547,2.2184754652,-3.5843181267

N,0,3.7240257258,2.9934231153,-4.882986676  
 C,0,4.4427615318,2.1856943121,-5.9466955699  
 C,0,4.5357217272,4.2416542284,-4.5943732799  
 C,0,2.3299434327,3.4120657582,-5.4351124407  
 C,0,1.464615024,4.0905381425,-4.4129789521  
 C,0,1.1899969665,5.4052543755,-4.4531124932  
 H,0,2.1254840453,-1.0725320551,-1.1648997746  
 H,0,0.9549042758,-0.6459406165,-2.475382476  
 H,0,2.4324918594,-1.5989785131,-2.8675511314  
 H,0,4.6556332917,1.9568151871,-3.2937244941  
 H,0,3.2242567244,2.8955334491,-2.8246377382  
 H,0,3.8541772047,1.2903237882,-6.1572571239  
 H,0,4.5290565971,2.8141485694,-6.8388227549  
 H,0,5.4345265528,1.927183715,-5.5614518551  
 H,0,5.5146443074,3.933237428,-4.2142054728  
 H,0,4.6425926308,4.7947810802,-5.5322009395  
 H,0,3.9972970971,4.8401770492,-3.8540614191  
 H,0,2.5569863657,4.0719490193,-6.2801838822  
 H,0,1.8774091882,2.4842155469,-5.7975553936  
 H,0,1.013018573,3.4600782485,-3.6440277413  
 H,0,1.6145465724,6.0502612092,-5.2258405304  
 H,0,0.5228832597,5.8642068517,-3.7223939721

### TS B97D/6-31+G \*\*/ PCM-TS

/home/bibaswanbiswas/c8/Parentcalcs/b97family/23parent  
 TSB97DSS  
 23 parent ts  
 B97D/6-31+G\*\*  
 E(RB97D) = -518.696707820

Zero-point correction= 0.217204 (Hartree/Particle)  
 Thermal correction to Energy= 0.230198  
 Thermal correction to Enthalpy= 0.231142  
 Thermal correction to Gibbs Free Energy= 0.178710  
 Sum of electronic and ZPE= -518.479504  
 Sum of electronic and thermal Energies= -518.466510  
 Sum of electronic and thermal Enthalpies= -518.465566  
 Sum of electronic and thermal Free Energies= -518.517998

| E             | CV        | S         |
|---------------|-----------|-----------|
| KCal/Mol      | Cal/Mol-K | Cal/Mol-K |
| Total 144.451 | 48.161    | 110.354   |

C,0,1.9798755105,-0.8480299921,-2.35685013  
 O,0,2.7658999532,0.3578682374,-2.4711999942  
 C,0,2.8462504077,0.9061500604,-3.7507819627  
 C,0,3.5697244056,2.1337729604,-3.7226019974  
 N,0,3.8383117896,2.879903219,-4.8716463925  
 C,0,4.6651344623,4.0800776964,-4.5718596487  
 O,0,2.3213629263,0.3410369967,-4.7334779575  
 C,0,4.3703824437,2.1500430419,-6.0583060956  
 C,0,2.1250593563,3.714513854,-5.6625936116  
 C,0,1.5060686538,4.2578476635,-4.4991536592  
 C,0,0.9131954857,3.4425081801,-3.57045451  
 H,0,2.0241358657,-1.1229759336,-1.2965016293  
 H,0,0.9383953333,-0.665272175,-2.6607616149  
 H,0,2.4012420778,-1.6520345996,-2.978021079  
 H,0,3.7935497375,2.6032119331,-2.7707251108  
 H,0,5.3886830018,1.8003932583,-5.8317502087  
 H,0,3.7162309963,1.3023643115,-6.2737332094

H,0,4.3913717634,2.8449538743,-6.9066748274  
 H,0,5.655924055,3.7600682536,-4.2167482385  
 H,0,4.7661611509,4.6761892301,-5.485414992  
 H,0,4.1603958243,4.6682563752,-3.7970021005  
 H,0,2.5577078387,4.3797965994,-6.4114458584  
 H,0,1.7662626709,2.7514175528,-6.0294709111  
 H,0,1.686045065,5.3085000717,-4.2548405882  
 H,0,0.6971081559,2.4000120283,-3.8036829553  
 H,0,0.5697750689,3.8268883022,-2.6083407169

### Cation B98/6-31G \*/PCM-Conf2

/home/bibaswanbiswas/c8/Parentcalcs/b97family/23parent  
 SM2B98SB  
 parent sm  
 b98/6-31G\*  
 E(RB98) = -519.297732939

Zero-point correction= 0.241750 (Hartree/Particle)  
 Thermal correction to Energy= 0.254650  
 Thermal correction to Enthalpy= 0.255594  
 Thermal correction to Gibbs Free Energy= 0.202269  
 Sum of electronic and ZPE= -519.055983  
 Sum of electronic and thermal Energies= -519.043083  
 Sum of electronic and thermal Enthalpies= -519.042139  
 Sum of electronic and thermal Free Energies= -519.095464

| E             | CV        | S         |
|---------------|-----------|-----------|
| KCal/Mol      | Cal/Mol-K | Cal/Mol-K |
| Total 159.795 | 47.061    | 112.232   |

C,0,2.0511520949,-0.8384620976,-2.2639335555  
 O,0,2.7947074989,0.3932776758,-2.4135007396  
 C,0,2.7792421129,0.9470487766,-3.6192617027  
 O,0,2.1969559895,0.508328807,-4.5889027448  
 C,0,3.6197415104,2.2253425322,-3.5664110666  
 N,0,3.7142066001,2.9929613558,-4.8618557916  
 C,0,4.4175943779,2.1712294835,-5.9161811474  
 C,0,4.535297041,4.2292661254,-4.5870102661  
 C,0,2.3284795708,3.4112466434,-5.4079750519  
 C,0,1.4709015842,4.1336859804,-4.4083463941  
 C,0,1.1903226772,5.4377896238,-4.5007330085  
 H,0,2.1846069419,-1.126600535,-1.2218540184  
 H,0,0.9955821013,-0.6658870919,-2.487329396  
 H,0,2.45616358,-1.6014509366,-2.9330890547  
 H,0,4.6384732172,1.9650009772,-3.2643334111  
 H,0,3.2092023223,2.8944690506,-2.8056072501  
 H,0,3.8335953909,1.2716131273,-6.1039749549  
 H,0,4.4964499314,2.7740422465,-6.8225688936  
 H,0,5.4136707454,1.9171059896,-5.548424771  
 H,0,5.5060037646,3.9241537246,-4.1924949591  
 H,0,4.664779615,4.7711044532,-5.5253173525  
 H,0,4.0062716472,4.8505911853,-3.8635780573  
 H,0,2.545216563,4.0393657688,-6.2754247168  
 H,0,1.8598974626,2.4830581522,-5.7395153558  
 H,0,1.0140965468,3.5361470811,-3.6203318549  
 H,0,1.6043484755,6.0612908047,-5.291476956  
 H,0,0.5220726368,5.9215990963,-3.7928905292



**TS B98/6-31G \*/ PCM-TS**

/home/bibaswanbiswas/c8/Parentcalcs/b97family/23parent  
 TSB98SB  
 23 parent ts  
 b98/6-31G\*  
 E(RB98) = -518.778127035

Zero-point correction= 0.224009 (Hartree/Particle)  
 Thermal correction to Energy= 0.236695  
 Thermal correction to Enthalpy= 0.237640  
 Thermal correction to Gibbs Free Energy= 0.185806  
 Sum of electronic and ZPE= -518.554118  
 Sum of electronic and thermal Energies= -518.541432  
 Sum of electronic and thermal Enthalpies= -518.540488  
 Sum of electronic and thermal Free Energies= -518.592321

| E             | CV        | S         |
|---------------|-----------|-----------|
| KCal/Mol      | Cal/Mol-K | Cal/Mol-K |
| Total 148.529 | 46.748    | 109.093   |

C,0,2.0351915029,-0.8199621689,-2.3344432231  
 O,0,2.7266413509,0.422673644,-2.4552158271  
 C,0,2.7996908645,0.9343133892,-3.7276172516  
 C,0,3.439543792,2.2120700238,-3.7180254457  
 N,0,3.7988004862,2.8993535806,-4.868964433  
 C,0,4.6858576417,4.0450461523,-4.5744597175  
 O,0,2.3300928962,0.3195786426,-4.693045269  
 C,0,4.2975507558,2.1130335139,-6.021546311  
 C,0,2.1341690469,3.845453199,-5.6946417408  
 C,0,1.5026782756,4.2656020793,-4.5042407364  
 C,0,0.98585198,3.3312692607,-3.6439036039  
 H,0,2.0744628231,-1.0776374792,-1.2735342148  
 H,0,0.9920362705,-0.7271847763,-2.6572815925  
 H,0,2.5191146524,-1.6035597215,-2.9276462143  
 H,0,3.7141424658,2.6565390461,-2.7715624032  
 H,0,5.303558683,1.7347527723,-5.7993564134  
 H,0,3.6206238852,1.2785709134,-6.1977229862  
 H,0,4.3382781019,2.7652465147,-6.8985571399  
 H,0,5.6412126181,3.6846784938,-4.1728513251  
 H,0,4.8634408437,4.609089247,-5.4930489118  
 H,0,4.2010139373,4.6910731773,-3.8384797952  
 H,0,2.5720488361,4.5735066329,-6.3753021154  
 H,0,1.795294042,2.9229135515,-6.1616488199  
 H,0,1.6732859554,5.2831316116,-4.1505973805  
 H,0,0.7152845933,2.3406726597,-3.9981556954  
 H,0,0.6543876994,3.5972370402,-2.6421914327

**Cation B98/6-31+G\* \*/PCM-Conf2**

/home/bibaswanbiswas/c8/Parentcalcs/b97family/23parent  
 SM2B98SS  
 parent sm  
 b98/6-31+G\*\*  
 E(RB98) = -519.330102315

Zero-point correction= 0.240167 (Hartree/Particle)  
 Thermal correction to Energy= 0.253178  
 Thermal correction to Enthalpy= 0.254123  
 Thermal correction to Gibbs Free Energy= 0.200411  
 Sum of electronic and ZPE= -519.089935  
 Sum of electronic and thermal Energies= -519.076924

Sum of electronic and thermal Enthalpies= -519.075980  
 Sum of electronic and thermal Free Energies= -519.129691

| E             | CV        | S         |
|---------------|-----------|-----------|
| KCal/Mol      | Cal/Mol-K | Cal/Mol-K |
| Total 158.872 | 47.378    | 113.045   |

C,0,2.0450435856,-0.8438261167,-2.2514978415  
 O,0,2.7855741189,0.3919503897,-2.4110161534  
 C,0,2.7835625983,0.9389173373,-3.6208642759  
 O,0,2.2115251152,0.4911307794,-4.5942157179  
 C,0,3.6232682861,2.2160897102,-3.5711435091  
 N,0,3.7155216955,2.9917328526,-4.8624738276  
 C,0,4.4176219765,2.1784979748,-5.9261902622  
 C,0,4.5421548553,4.2240415271,-4.5779200664  
 C,0,2.333075693,3.4200709572,-5.4060969951  
 C,0,1.4772143564,4.1450643922,-4.4058711479  
 C,0,1.1705343792,5.4433163892,-4.5162274646  
 H,0,2.1757358284,-1.1187418556,-1.2062100138  
 H,0,0.9906208736,-0.6757183276,-2.4805952297  
 H,0,2.4582110355,-1.6106674694,-2.9101233536  
 H,0,4.6420289956,1.9505571625,-3.2748146264  
 H,0,3.2181326288,2.879766778,-2.8034282973  
 H,0,3.8262463555,1.288974103,-6.1357246497  
 H,0,4.510857665,2.7956918579,-6.8206633625  
 H,0,5.407189435,1.9067507003,-5.5555549644  
 H,0,5.5179661186,3.9117792167,-4.2041403895  
 H,0,4.65717726,4.7816508914,-5.5078953601  
 H,0,4.0265379934,4.8334094645,-3.8358609827  
 H,0,2.5519310566,4.0496877214,-6.2715173033  
 H,0,1.8557547401,2.4981103667,-5.7421620211  
 H,0,1.038016093,3.5557079056,-3.6022222747  
 H,0,1.5668265811,6.0606458036,-5.3201575804  
 H,0,0.5007026797,5.9227274882,-3.8077353292

**TS B98/6-31+G \*\*/ PCM-TS**

/home/bibaswanbiswas/c8/Parentcalcs/b97family/23parent  
 TSB98SS  
 23 parent ts  
 b98/6-31+G\*\*  
 E(RB98) = -518.819267263

Zero-point correction= 0.222269 (Hartree/Particle)  
 Thermal correction to Energy= 0.235138  
 Thermal correction to Enthalpy= 0.236082  
 Thermal correction to Gibbs Free Energy= 0.183823  
 Sum of electronic and ZPE= -518.596999  
 Sum of electronic and thermal Energies= -518.584129  
 Sum of electronic and thermal Enthalpies= -518.583185  
 Sum of electronic and thermal Free Energies= -518.635444

| E             | CV        | S         |
|---------------|-----------|-----------|
| KCal/Mol      | Cal/Mol-K | Cal/Mol-K |
| Total 147.551 | 47.257    | 109.988   |

C,0,2.0412593518,-0.8267692261,-2.3008137363  
 O,0,2.7190278056,0.4260191141,-2.4465444468  
 C,0,2.8149821644,0.9158214068,-3.7260214799  
 C,0,3.4390770886,2.2031873612,-3.7276469734  
 N,0,3.8088367451,2.8904031776,-4.871452986

C,0,4.7039598834,4.0301849209,-4.5710538603  
 O,0,2.3823501301,0.2702665079,-4.6915996997  
 C,0,4.2899686952,2.118488755,-6.0416133272  
 C,0,2.121164167,3.8847659106,-5.7040955003  
 C,0,1.4958322248,4.2725832317,-4.500377354  
 C,0,0.9507901039,3.327221729,-3.6660957999  
 H,0,2.0625881891,-1.0475448506,-1.2322592323  
 H,0,1.0054493406,-0.7548936703,-2.6478627509  
 H,0,2.552942135,-1.6181270278,-2.8573736186  
 H,0,3.6774918205,2.6629131817,-2.7786773971  
 H,0,5.2797821021,1.6995524141,-5.8213458399  
 H,0,3.5912812062,1.3119609791,-6.2546053745  
 H,0,4.3627897419,2.7946387344,-6.8968185888  
 H,0,5.6641030908,3.6602639015,-4.1909250764  
 H,0,4.8698339524,4.6082159939,-5.4820486516  
 H,0,4.2355700886,4.666575482,-3.8173392102  
 H,0,2.5811594768,4.6272986847,-6.352209248  
 H,0,1.7879226145,2.9742864537,-6.1964816921  
 H,0,1.67564128,5.2774920731,-4.1179039433  
 H,0,0.6787563818,2.3445318943,-4.0402643938  
 H,0,0.62169422,3.5781238673,-2.660609818

### Cation wB97/6-31G \*/PCM-Conf2

/home/bibaswanbiswas/c8/Parentcalcs/b97family/23parent  
 SM2wB97SB  
 parent sm  
 wb97/6-31G\*  
 E(RwB97) = -519.414979918

Zero-point correction= 0.245716 (Hartree/Particle)  
 Thermal correction to Energy= 0.258387  
 Thermal correction to Enthalpy= 0.259332  
 Thermal correction to Gibbs Free Energy= 0.206296  
 Sum of electronic and ZPE= -519.169264  
 Sum of electronic and thermal Energies= -519.156592  
 Sum of electronic and thermal Enthalpies= -519.155648  
 Sum of electronic and thermal Free Energies= -519.208684

| E        | CV        | S              |
|----------|-----------|----------------|
| KCal/Mol | Cal/Mol-K | Cal/Mol-K      |
| Total    | 162.141   | 46.124 111.624 |

C,0,2.027264072,-0.7818090359,-2.2746428635  
 O,0,2.7964059745,0.4324154631,-2.411527894  
 C,0,2.7752324748,0.989122438,-3.6139720138  
 O,0,2.1743214336,0.5576888068,-4.5747646762  
 C,0,3.6246608842,2.253090682,-3.5759765845  
 N,0,3.7193050049,2.9940831032,-4.8741495637  
 C,0,4.4283885243,2.1628687254,-5.9015625403  
 C,0,4.5257106615,4.2319491902,-4.6175014917  
 C,0,2.3524997067,3.3934596299,-5.4274080012  
 C,0,1.4687606399,4.0560766068,-4.4103891753  
 C,0,1.2017410043,5.3606069905,-4.4307777236  
 H,0,2.1773223714,-1.1038478471,-1.2440361874  
 H,0,0.9711804255,-0.5746521922,-2.4672529062  
 H,0,2.3948508867,-1.5358232078,-2.9756398828  
 H,0,4.6414302752,1.9859732941,-3.2700271664  
 H,0,3.2183340121,2.9335539517,-2.8210307355  
 H,0,3.8567645921,1.2493654465,-6.0687323533  
 H,0,4.4967454112,2.7431522473,-6.8249303675

H,0,5.4299928937,1.9309849451,-5.5308797365  
 H,0,5.4936951962,3.942262444,-4.2021057288  
 H,0,4.6666096827,4.7554447871,-5.5659103248  
 H,0,3.9834264232,4.8672011451,-3.9138096345  
 H,0,2.5651588927,4.0640194603,-6.2659872998  
 H,0,1.901550771,2.4735988762,-5.805539994  
 H,0,0.9935100093,3.4125129641,-3.6685078846  
 H,0,1.6389455281,6.023289565,-5.1782074461  
 H,0,0.5252242481,5.8107295207,-3.7070528244

### TS WB97/6-31G \*/PCM-TS

home/bibaswanbiswas/c8/Parentcalcs/b97family/23parentT  
 SwB97SB  
 23 parent ts  
 wb97/6-31G\*  
 E(RwB97) = -518.876911794

Zero-point correction= 0.229013 (Hartree/Particle)  
 Thermal correction to Energy= 0.240985  
 Thermal correction to Enthalpy= 0.241929  
 Thermal correction to Gibbs Free Energy= 0.191754  
 Sum of electronic and ZPE= -518.647899  
 Sum of electronic and thermal Energies= -518.635927  
 Sum of electronic and thermal Enthalpies= -518.634983  
 Sum of electronic and thermal Free Energies= -518.685157

| E        | CV        | S              |
|----------|-----------|----------------|
| KCal/Mol | Cal/Mol-K | Cal/Mol-K      |
| Total    | 151.220   | 44.788 105.601 |

C,0,2.0647973152,-0.8397152466,-2.3884806782  
 O,0,2.7186324101,0.4262440472,-2.4845413274  
 C,0,2.7190795111,0.9818967749,-3.7294304435  
 C,0,3.2515619291,2.3130375028,-3.7040519631  
 N,0,3.6830072335,2.9465244389,-4.8925948633  
 C,0,4.5854705612,4.0675706801,-4.572208716  
 O,0,2.2148794265,0.3970282587,-4.6908063013  
 C,0,4.2696863181,2.1047983286,-5.9551671426  
 C,0,2.1813682645,3.7812811284,-5.6941129518  
 C,0,1.5324294751,4.2953791521,-4.5512289291  
 C,0,1.2028388577,3.3214392224,-3.6270402817  
 H,0,2.1473311126,-1.1377865395,-1.3405912436  
 H,0,1.010449279,-0.7595860105,-2.6747960464  
 H,0,2.5515527928,-1.5818681297,-3.0301898615  
 H,0,3.7121043067,2.6571118689,-2.7841855214  
 H,0,5.2528503125,1.7363985693,-5.6389766098  
 H,0,3.6040434238,1.2648956983,-6.1534248608  
 H,0,4.3835485864,2.7163079062,-6.8570555472  
 H,0,5.4955621267,3.6877227101,-4.0932747124  
 H,0,4.8467692955,4.59643196,-5.4940217149  
 H,0,4.0703735543,4.7515208202,-3.8915045191  
 H,0,2.61885162,4.4537817486,-6.4361190914  
 H,0,1.787498261,2.8552326542,-6.1218154965  
 H,0,1.7594197233,5.3097126477,-4.2201704534  
 H,0,0.7866147028,2.3760155581,-3.9748880605  
 H,0,0.9635336004,3.5760852505,-2.5933626629

**Cation wB97XD/6-31G \*/PCM-Conf2**

/home/bibaswanbiswas/c8/Parentcalcs/b97family/23parent  
SM2wB97XDDB

parent sm

wb97xd/6-31G\*

E(RwB97XD) = -519.348291809

Zero-point correction= 0.244927 (Hartree/Particle)  
Thermal correction to Energy= 0.257599  
Thermal correction to Enthalpy= 0.258543  
Thermal correction to Gibbs Free Energy= 0.205559  
Sum of electronic and ZPE= -519.103365  
Sum of electronic and thermal Energies= -519.090693  
Sum of electronic and thermal Enthalpies= -519.089749  
Sum of electronic and thermal Free Energies= -519.142733

| E             | CV        | S         |
|---------------|-----------|-----------|
| KCal/Mol      | Cal/Mol-K | Cal/Mol-K |
| Total 161.646 | 46.168    | 111.515   |

C,0,2.0403547456,-0.7867962794,-2.2668301088  
O,0,2.8041856281,0.4228924401,-2.4216470239  
C,0,2.7693074886,0.9853819402,-3.6166718377  
O,0,2.1607071269,0.5610826954,-4.5723325102  
C,0,3.6131878276,2.2505046315,-3.5772362448  
N,0,3.7156704256,2.9935485937,-4.8748035216  
C,0,4.4291701538,2.1629293654,-5.901018312  
C,0,4.5218658988,4.2309520664,-4.6100797711  
C,0,2.3483565629,3.3971941767,-5.436540455  
C,0,1.4619365898,4.0613303066,-4.4292966264  
C,0,1.2123560028,5.3685965162,-4.4345820445  
H,0,2.2309259681,-1.1191490322,-1.2489713514  
H,0,0.9795417257,-0.5760891329,-2.4114406418  
H,0,2.3744398038,-1.5350992163,-2.9869045452  
H,0,4.6264220906,1.9891580328,-3.264507918  
H,0,3.2014749402,2.9297894177,-2.8280326271  
H,0,3.8556868633,1.2556848434,-6.0776825928  
H,0,4.5088583147,2.7453729103,-6.8187167879  
H,0,5.4233012587,1.9234806082,-5.5236323095  
H,0,5.486786437,3.9412875014,-4.1949099981  
H,0,4.6638423405,4.758609696,-5.5526315392  
H,0,3.9796012575,4.8610688732,-3.9062359041  
H,0,2.5686731507,4.0593743359,-6.2755872844  
H,0,1.8999900098,2.4784012293,-5.8112517626  
H,0,0.972038497,3.4166768656,-3.7030601209  
H,0,1.665440842,6.0358740006,-5.1638445589  
H,0,0.5349100498,5.8152606142,-3.7138746023

**WB97XD/6-31G \*/ PCM-TS**

/home/bibaswanbiswas/c8/Parentcalcs/b97family/23parent  
TSwB97XDDB

glycine allyl TSfreq

wb97xd/6-31G\*

E(RwB97XD) = -518.818252298

Zero-point correction= 0.227675 (Hartree/Particle)  
Thermal correction to Energy= 0.239819  
Thermal correction to Enthalpy= 0.240763  
Thermal correction to Gibbs Free Energy= 0.190399  
Sum of electronic and ZPE= -518.590577

Sum of electronic and thermal Energies= -518.578434  
Sum of electronic and thermal Enthalpies= -518.577489  
Sum of electronic and thermal Free Energies= -518.627854

| E             | CV        | S         |
|---------------|-----------|-----------|
| KCal/Mol      | Cal/Mol-K | Cal/Mol-K |
| Total 150.488 | 45.456    | 106.000   |

C,0,2.0142989125,-0.7958060399,-2.3641659798  
O,0,2.711634185,0.4381595342,-2.4762017862  
C,0,2.7803116218,0.959587034,-3.7337312741  
C,0,3.3875172225,2.2489364786,-3.7178403505  
N,0,3.7729411004,2.9115393467,-4.8740432652  
C,0,4.6409939234,4.0601898382,-4.575828495  
O,0,2.3081801512,0.3582182663,-4.7002946578  
C,0,4.3000605232,2.1166898535,-5.9964975015  
C,0,2.1295999673,3.8068074742,-5.6969127528  
C,0,1.5230595358,4.2431118646,-4.5111421398  
C,0,1.1031006121,3.2894966388,-3.6195930458  
H,0,2.0513860109,-1.062555839,-1.3076170661  
H,0,0.9739551785,-0.692250158,-2.6857291704  
H,0,2.492675602,-1.5758891964,-2.9627531652  
H,0,3.7234357748,2.6577855144,-2.7763202792  
H,0,5.3007313618,1.7451422969,-5.7509659543  
H,0,3.6317415666,1.2793626874,-6.182060697  
H,0,4.3569695255,2.7561916477,-6.8803461497  
H,0,5.5844255383,3.7148927115,-4.1401452366  
H,0,4.8414391448,4.6101033469,-5.4966970748  
H,0,4.1303378232,4.7155151035,-3.8680122479  
H,0,2.5504230853,4.5199078396,-6.4023156174  
H,0,1.7907978273,2.8716356812,-6.1371650561  
H,0,1.7098087575,5.2584419727,-4.1662084386  
H,0,0.7734548698,2.3178212197,-3.9726473748  
H,0,0.8309741785,3.5444258826,-2.5988052232

**Cation wB97XD/6-31+G \*\*/PCM-Conf2**

/home/bibaswanbiswas/c8/Parentcalcs/b97family/23parent  
SM2wB97XDSS

parent sm

wb97xd/6-31+G\*\*

E(RwB97XD) = -519.379062031

Zero-point correction= 0.243470 (Hartree/Particle)  
Thermal correction to Energy= 0.256170  
Thermal correction to Enthalpy= 0.257114  
Thermal correction to Gibbs Free Energy= 0.204264  
Sum of electronic and ZPE= -519.135592  
Sum of electronic and thermal Energies= -519.122892  
Sum of electronic and thermal Enthalpies= -519.121948  
Sum of electronic and thermal Free Energies= -519.174798

| E             | CV        | S         |
|---------------|-----------|-----------|
| KCal/Mol      | Cal/Mol-K | Cal/Mol-K |
| Total 160.749 | 46.433    | 111.233   |

C,0,2.0281293843,-0.7863721771,-2.2529988938  
O,0,2.7911535574,0.4252327463,-2.4182452221  
C,0,2.7763381389,0.9754952203,-3.6199554132  
O,0,2.1828585502,0.5377711058,-4.5808939298  
C,0,3.6201820071,2.2391083105,-3.5841410717

N,0,3.7180947506,2.9918551932,-4.8765676076  
 C,0,4.4323251679,2.1745110928,-5.9143231153  
 C,0,4.5263986848,4.2269549039,-4.6010660011  
 C,0,2.3515453701,3.4013178072,-5.4331993999  
 C,0,1.4676958764,4.0666127736,-4.4238230381  
 C,0,1.1950947567,5.3702017465,-4.4467400474  
 H,0,2.2165466026,-1.1064420806,-1.2314422709  
 H,0,0.9682709699,-0.5766560723,-2.402303379  
 H,0,2.3672635707,-1.5404796027,-2.9637932876  
 H,0,4.6339982417,1.9720538635,-3.2787829492  
 H,0,3.2153167712,2.9129388176,-2.826834865  
 H,0,3.8559316063,1.2746304928,-6.1146684597  
 H,0,4.5216477063,2.7741388699,-6.8193230684  
 H,0,5.4219499736,1.9218569666,-5.5354585774  
 H,0,5.4959733915,3.9313947338,-4.2028025327  
 H,0,4.6561110091,4.7689842514,-5.5363793634  
 H,0,3.9937200527,4.845914149,-3.8810852519  
 H,0,2.5711564849,4.0658025836,-6.270384143  
 H,0,1.897328593,2.4863513842,-5.8106609812  
 H,0,0.9946790378,3.4282521689,-3.6811087802  
 H,0,1.6314233022,6.0318371689,-5.1906864237  
 H,0,0.5178984421,5.8140515823,-3.7246549271

### TS WB97XD/6-31+G \*\*/ PCM-TS

/home/bibaswanbiswas/c8/Parentcalcs/b97family/23parent  
 TSwb97SDSS  
 23 parent ts  
 wb97xD/6-31+G\*\*  
 E(Rwb97XD) = -518.856711302

Zero-point correction= 0.225781 (Hartree/Particle)  
 Thermal correction to Energy= 0.238136  
 Thermal correction to Enthalpy= 0.239081  
 Thermal correction to Gibbs Free Energy= 0.188120  
 Sum of electronic and ZPE= -518.630930  
 Sum of electronic and thermal Energies= -518.618575  
 Sum of electronic and thermal Enthalpies= -518.617631  
 Sum of electronic and thermal Free Energies= -518.668591

| E        | CV        | S              |
|----------|-----------|----------------|
| KCal/Mol | Cal/Mol-K | Cal/Mol-K      |
| Total    | 149.433   | 46.011 107.256 |

C,0,2.0089085743,-0.79561239,-2.3373730977  
 O,0,2.7030905924,0.4428211763,-2.4699512709  
 C,0,2.7909823498,0.9483538925,-3.7322269943  
 C,0,3.3905335106,2.2426879308,-3.7267149683  
 N,0,3.786101013,2.9042598198,-4.875669322  
 C,0,4.6585188323,4.0497433533,-4.5740132981  
 O,0,2.3466248635,0.3238485041,-4.7004090288  
 C,0,4.2969821442,2.121217749,-6.0139776092  
 C,0,2.1132098054,3.8395638969,-5.7066715256  
 C,0,1.5202629807,4.242477767,-4.5045649932  
 C,0,1.0848920454,3.273465002,-3.6332181558  
 H,0,2.0335749313,-1.0341410229,-1.2747892065  
 H,0,0.9738367892,-0.7005702923,-2.6751366819  
 H,0,2.5026534426,-1.5844726251,-2.9098300666  
 H,0,3.6970687527,2.6640778616,-2.7806398626  
 H,0,5.2868601032,1.7194244731,-5.7733139154  
 H,0,3.6127157737,1.3042747566,-6.2275258246

H,0,4.3741703217,2.7800141987,-6.880930494  
 H,0,5.6069886747,3.6997272901,-4.1537250652  
 H,0,4.8483165322,4.6092953984,-5.49042632  
 H,0,4.1591718596,4.6991293697,-3.8534976175  
 H,0,2.5482474309,4.5684301561,-6.3855334972  
 H,0,1.7838566139,2.9110256268,-6.1662266421  
 H,0,1.7129216978,5.2474028363,-4.1342723954  
 H,0,0.755154883,2.3092335149,-4.0058430288  
 H,0,0.8186094818,3.5117827559,-2.6075591183

### Cation wb97X/6-31G \*/PCM-Conf2

/home/bibaswanbiswas/c8/Parentcalcs/b97family/23parent  
 SM2wb97XSB  
 parent sm  
 wb97x/6-31G\*  
 E(Rwb97X) = -519.373462601

Zero-point correction= 0.245540 (Hartree/Particle)  
 Thermal correction to Energy= 0.258240  
 Thermal correction to Enthalpy= 0.259184  
 Thermal correction to Gibbs Free Energy= 0.206043  
 Sum of electronic and ZPE= -519.127923  
 Sum of electronic and thermal Energies= -519.115223  
 Sum of electronic and thermal Enthalpies= -519.114279  
 Sum of electronic and thermal Free Energies= -519.167419

| E        | CV        | S              |
|----------|-----------|----------------|
| KCal/Mol | Cal/Mol-K | Cal/Mol-K      |
| Total    | 162.048   | 46.151 111.843 |

C,0,2.0413972326,-0.7945103089,-2.2775796753  
 O,0,2.8020144345,0.4208797263,-2.4172706499  
 C,0,2.7761660057,0.9815270416,-3.614571658  
 O,0,2.1769739038,0.552019516,-4.574329743  
 C,0,3.6182736522,2.2475186299,-3.5728766926  
 N,0,3.7144545745,2.9929216119,-4.8678585174  
 C,0,4.4210593006,2.1642960158,-5.8984892658  
 C,0,4.5238187865,4.2272672345,-4.6071549332  
 C,0,2.3472540979,3.3965141857,-5.4199362321  
 C,0,1.4713200604,4.0779762002,-4.4129364175  
 C,0,1.203923097,5.38033531,-4.4554815415  
 H,0,2.2053140473,-1.1214697123,-1.252777242  
 H,0,0.9837375199,-0.5915271182,-2.454580335  
 H,0,2.4014523875,-1.542590624,-2.9857592697  
 H,0,4.6334276738,1.9847267625,-3.2649196212  
 H,0,3.2090567725,2.9234592662,-2.8183888557  
 H,0,3.8456045969,1.2573201771,-6.0737022728  
 H,0,4.49681842,2.7489877275,-6.815984253  
 H,0,5.4180191156,1.9234187849,-5.5271396299  
 H,0,5.4905919915,3.9347069384,-4.1963822454  
 H,0,4.6635044494,4.7544272304,-5.5513226068  
 H,0,3.9864728796,4.8597352956,-3.9005456411  
 H,0,2.5613815783,4.0516793529,-6.2672877692  
 H,0,1.8906290982,2.476035727,-5.7833593078  
 H,0,0.9988026818,3.4500703046,-3.6591273084  
 H,0,1.6368531031,6.0299901442,-5.2137302412  
 H,0,0.5307105387,5.8416025803,-3.7388310749

**TS wB97x/6-31G\*/PCM-TS**

/home/bibaswanbiswas/c8/Parentcalcs/b97family/23parent  
 TSwB97xSB  
 23 parent ts  
 wb97x/6-31G\*  
 E(RwB97X) = -518.839136984

Zero-point correction= 0.228505 (Hartree/Particle)  
 Thermal correction to Energy= 0.240607  
 Thermal correction to Enthalpy= 0.241551  
 Thermal correction to Gibbs Free Energy= 0.191103  
 Sum of electronic and ZPE= -518.610632  
 Sum of electronic and thermal Energies= -518.598530  
 Sum of electronic and thermal Enthalpies= -518.597586  
 Sum of electronic and thermal Free Energies= -518.648034

| E             | CV        | S         |
|---------------|-----------|-----------|
| KCal/Mol      | Cal/Mol-K | Cal/Mol-K |
| Total 150.983 | 45.169    | 106.176   |

C,0,2.0392631875,-0.8147728155,-2.3740740216  
 O,0,2.7144533461,0.4348897983,-2.4773640026  
 C,0,2.7513968478,0.9720060946,-3.7287903311  
 C,0,3.3243847463,2.2800981033,-3.7113197289  
 N,0,3.7337319621,2.9258125976,-4.880010738  
 C,0,4.618078319,4.0605140935,-4.5744437174  
 O,0,2.2637115654,0.3781464254,-4.6914495461  
 C,0,4.2843844744,2.1094603426,-5.9762166106  
 C,0,2.1490882964,3.8028944059,-5.6980254947  
 C,0,1.5275046017,4.2661713676,-4.5289151535  
 C,0,1.1500940974,3.2999020693,-3.6264192833  
 H,0,2.0963729801,-1.0974964744,-1.322176329  
 H,0,0.9932959499,-0.7231490757,-2.6806787815  
 H,0,2.5232578692,-1.5752239923,-2.9930657919  
 H,0,3.7181632452,2.6583834982,-2.7774695608  
 H,0,5.2794771442,1.7414009855,-5.7035561869  
 H,0,3.6190845848,1.2693981822,-6.1636509746  
 H,0,4.3622408252,2.7345221309,-6.8699971139  
 H,0,5.5452505542,3.7007133586,-4.1158090469  
 H,0,4.8496793674,4.5976663473,-5.4967396119  
 H,0,4.1055613447,4.7321866191,-3.8824942155  
 H,0,2.5780584198,4.5002916109,-6.4167462351  
 H,0,1.790477557,2.8708425981,-6.1336018654  
 H,0,1.7227000427,5.2821888878,-4.1884173813  
 H,0,0.786274875,2.3398846711,-3.9823261485  
 H,0,0.8882677964,3.5507291699,-2.6002821289

**Cation wb97x /6-31+G \*\*/PCM-Conf2**

/home/bibaswanbiswas/c8/Parentcalcs/b97family/23parent  
 SM2wB97XSS  
 parent sm  
 wb97x/6-31+G\*\*  
 E(RwB97X) = -519.406513476

Zero-point correction= 0.243947 (Hartree/Particle)  
 Thermal correction to Energy= 0.256704  
 Thermal correction to Enthalpy= 0.257648  
 Thermal correction to Gibbs Free Energy= 0.204398  
 Sum of electronic and ZPE= -519.162567  
 Sum of electronic and thermal Energies= -519.149810

Sum of electronic and thermal Enthalpies= -519.148866  
 Sum of electronic and thermal Free Energies= -519.202115

| E             | CV        | S         |
|---------------|-----------|-----------|
| KCal/Mol      | Cal/Mol-K | Cal/Mol-K |
| Total 161.084 | 46.401    | 112.073   |

C,0,2.0303271615,-0.7932456544,-2.2629029431  
 O,0,2.7893332396,0.4251491313,-2.4138539885  
 C,0,2.7816572643,0.9749763353,-3.6170420288  
 O,0,2.1950482311,0.5332519975,-4.5811868043  
 C,0,3.6238052887,2.2392881506,-3.5801392237  
 N,0,3.7171545757,2.9919536905,-4.8712450891  
 C,0,4.4230255746,2.1726391328,-5.9113250661  
 C,0,4.5310881444,4.222634355,-4.6010517598  
 C,0,2.3519503028,3.4036573302,-5.4202875875  
 C,0,1.4746805726,4.0798359626,-4.4102047577  
 C,0,1.185798628,5.3785662808,-4.460111764  
 H,0,2.1835252702,-1.1002987149,-1.230827623  
 H,0,0.9749544257,-0.5948170487,-2.4560338649  
 H,0,2.404558453,-1.5503499006,-2.953452863  
 H,0,4.6393168139,1.9710108415,-3.2780176696  
 H,0,3.2205933576,2.9111404097,-2.8189980807  
 H,0,3.8425749403,1.2731078259,-6.1066320635  
 H,0,4.5091534611,2.7717945099,-6.8181094975  
 H,0,5.4154091576,1.9181966107,-5.5379464739  
 H,0,5.5023350703,3.9226097615,-4.2076437806  
 H,0,4.6587613632,4.7636971997,-5.5384097078  
 H,0,4.00505958,4.8451724036,-3.8778689603  
 H,0,2.5676805663,4.0656560813,-6.2619343097  
 H,0,1.8907047584,2.48896155,-5.7932298057  
 H,0,1.0147139581,3.45305484,-3.6475083413  
 H,0,1.605963871,6.0281593719,-5.2253358687  
 H,0,0.50985797,5.8315155463,-3.7410230775

**TSwB97x/6-31+G\*\*/PCM**

/home/bibaswanbiswas/c8/Parentcalcs/b97family/23parent  
 TSwB97xSS  
 23 parent ts  
 wB97x/6-31+G\*\*  
 E(RwB97X) = -518.879949446

Zero-point correction= 0.226475 (Hartree/Particle)  
 Thermal correction to Energy= 0.238794  
 Thermal correction to Enthalpy= 0.239739  
 Thermal correction to Gibbs Free Energy= 0.188772  
 Sum of electronic and ZPE= -518.653474  
 Sum of electronic and thermal Energies= -518.641155  
 Sum of electronic and thermal Enthalpies= -518.640211  
 Sum of electronic and thermal Free Energies= -518.691177

| E             | CV        | S         |
|---------------|-----------|-----------|
| KCal/Mol      | Cal/Mol-K | Cal/Mol-K |
| Total 149.846 | 45.759    | 107.268   |

C,0,2.0338231588,-0.8112522384,-2.336653686  
 O,0,2.6986914702,0.4465865879,-2.4654764794  
 C,0,2.7658618417,0.9578768879,-3.7267977614  
 C,0,3.332566666,2.2692221281,-3.7245613077  
 N,0,3.7502469375,2.9171437834,-4.8826541058

C,0,4.6445145277,4.0438653786,-4.5728059848  
 O,0,2.3169383227,0.3299635249,-4.6905110387  
 C,0,4.2765332039,2.1145908315,-6.0008245891  
 C,0,2.1351735115,3.8504537227,-5.7070808756  
 C,0,1.5243566719,4.264458023,-4.5164337051  
 C,0,1.1193381183,3.2756201549,-3.6485257206  
 H,0,2.0759285181,-1.0587119333,-1.2761012556  
 H,0,0.9934889097,-0.7357899076,-2.6638915506  
 H,0,2.5409691455,-1.5810284365,-2.9236091994  
 H,0,3.68332659,2.6691091754,-2.7825396153  
 H,0,5.2579420891,1.705619026,-5.7366158451  
 H,0,3.5884975991,1.3014008166,-6.2208209118  
 H,0,4.3788804114,2.7640485798,-6.8736853878  
 H,0,5.5774036564,3.6743581887,-4.1336008491  
 H,0,4.8645931267,4.5931894915,-5.4900127378  
 H,0,4.1482762831,4.7095585574,-3.8637992785  
 H,0,2.5806142571,4.5743109908,-6.3874681113  
 H,0,1.7869338484,2.9317944044,-6.1765853767  
 H,0,1.7215515622,5.2667558882,-4.1386112225  
 H,0,0.7649511152,2.3243689241,-4.0363089111  
 H,0,0.852852458,3.4999484501,-2.618064493

### Cation LC-B97D /6-31G \*/PCM-Conf2

/home/bibaswanbiswas/c8/Parentcalcs/b97family/23parent  
 SMLCB97DSB  
 parent sm  
 LC-B97D/6-31G\*  
 E(RB97D) = -518.216650707

Zero-point correction= 0.246785 (Hartree/Particle)  
 Thermal correction to Energy= 0.258980  
 Thermal correction to Enthalpy= 0.259924  
 Thermal correction to Gibbs Free Energy= 0.208322  
 Sum of electronic and ZPE= -517.969866  
 Sum of electronic and thermal Energies= -517.957670  
 Sum of electronic and thermal Enthalpies= -517.956726  
 Sum of electronic and thermal Free Energies= -518.008329

| E        | CV        | S              |
|----------|-----------|----------------|
| KCal/Mol | Cal/Mol-K | Cal/Mol-K      |
| Total    | 162.513   | 45.152 108.607 |

C,0,1.989353905,-0.6828483473,-2.262528349  
 O,0,2.7986906503,0.4989901678,-2.4193588055  
 C,0,2.7496440793,1.0716964133,-3.6018873459  
 O,0,2.0944100652,0.6792326828,-4.5350597143  
 C,0,3.6240122751,2.3056134941,-3.5913970923  
 N,0,3.727002951,3.0014406935,-4.9088994951  
 C,0,4.4585373694,2.1455042585,-5.8906045163  
 C,0,4.5100354273,4.2537876781,-4.6763147198  
 C,0,2.3712543039,3.3773940958,-5.5060133651  
 C,0,1.432512444,3.8966873563,-4.4655360898  
 C,0,1.2544763563,5.1898574512,-4.2600055694  
 H,0,2.1483337983,-1.0140221655,-1.2370355169  
 H,0,0.9405093128,-0.4312208595,-2.439813655  
 H,0,2.3127403792,-1.4425635146,-2.9787280122  
 H,0,4.6366518324,2.0328079359,-3.283583681  
 H,0,3.2218815991,3.0134588224,-2.8624670364  
 H,0,3.902178674,1.2158475755,-6.0127811366  
 H,0,4.5108389442,2.6911211376,-6.8353126117

H,0,5.4615690488,1.958152212,-5.5007689291  
 H,0,5.4609673234,3.9858121876,-4.2108134917  
 H,0,4.6777906636,4.7312808185,-5.6435248562  
 H,0,3.9250346931,4.904850131,-4.0234814896  
 H,0,2.594761528,4.1318030612,-6.2648406009  
 H,0,1.9856088945,2.4759782427,-5.977601708  
 H,0,0.9036311499,3.1509024453,-3.8743743508  
 H,0,1.7855263223,5.9281617676,-4.8600468803  
 H,0,0.5710780094,5.5575922583,-3.4995439812

### TS LC-B97D/6-31G \*/PCM-TS

/home/bibaswanbiswas/c8/Parentcalcs/b97family/23parent  
 TSLCB97DSB  
 23 parent ts  
 LC-B97D/6-31G\*  
 E(RB97D) = -517.680577010

Zero-point correction= 0.229305 (Hartree/Particle)  
 Thermal correction to Energy= 0.241036  
 Thermal correction to Enthalpy= 0.241980  
 Thermal correction to Gibbs Free Energy= 0.192564  
 Sum of electronic and ZPE= -517.451272  
 Sum of electronic and thermal Energies= -517.439541  
 Sum of electronic and thermal Enthalpies= -517.438597  
 Sum of electronic and thermal Free Energies= -517.488013

| E        | CV        | S              |
|----------|-----------|----------------|
| KCal/Mol | Cal/Mol-K | Cal/Mol-K      |
| Total    | 151.252   | 44.463 104.005 |

C,0,1.8665656953,-0.7084827635,-2.4386998118  
 O,0,2.7072902216,0.4380079121,-2.5108465806  
 C,0,2.8305665286,0.981802071,-3.7444684079  
 C,0,3.4680533718,2.2485069801,-3.7029343693  
 N,0,3.8173604732,2.9064894862,-4.867086469  
 C,0,4.5801502552,4.1242225241,-4.601073593  
 O,0,2.3289673586,0.4403776491,-4.72662376  
 C,0,4.3831357478,2.1523017176,-5.9906338484  
 C,0,2.0640614183,3.6501951248,-5.6729481568  
 C,0,1.5315939855,4.1365281349,-4.4863810902  
 C,0,1.2503823742,3.2089393585,-3.5146804522  
 H,0,1.852616292,-1.0084835273,-1.389196827  
 H,0,0.8548262135,-0.4608072811,-2.7797978123  
 H,0,2.2581655607,-1.5169304356,-3.0638956091  
 H,0,3.8577381941,2.6213448109,-2.7657876336  
 H,0,5.4227679257,1.8803089802,-5.7668983737  
 H,0,3.7830916724,1.2594428242,-6.1561559108  
 H,0,4.3548983786,2.7962751437,-6.8761667047  
 H,0,5.5579600816,3.8656544844,-4.1749070445  
 H,0,4.7135253983,4.6709601629,-5.5391002976  
 H,0,4.0165369452,4.7403206388,-3.8945069468  
 H,0,2.4484842482,4.3164887052,-6.4432050277  
 H,0,1.7812815192,2.6502386321,-6.0002687691  
 H,0,1.7270445248,5.1708646613,-4.2064555611  
 H,0,0.8767705219,2.2298102864,-3.7999240743  
 H,0,1.0804190939,3.503084719,-2.4813968683

**Cation- B3LYP /6-31+G\*\*/PCM-Conf2**

/home/bibaswanbiswas/c8/Parentcalcs/23parentSM2B3LYP  
PSS

parent sm  
B3LYP/6-31+G\*\*  
E(RB3LYP) = -519.536967748

Zero-point correction= 0.240197 (Hartree/Particle)  
Thermal correction to Energy= 0.253276  
Thermal correction to Enthalpy= 0.254221  
Thermal correction to Gibbs Free Energy= 0.199879  
Sum of electronic and ZPE= -519.296770  
Sum of electronic and thermal Energies= -519.283691  
Sum of electronic and thermal Enthalpies= -519.282747  
Sum of electronic and thermal Free Energies= -519.337089

| E             | CV        | S         |
|---------------|-----------|-----------|
| KCal/Mol      | Cal/Mol-K | Cal/Mol-K |
| Total 158.933 | 47.446    | 114.371   |

C,0,2.0567111022,-0.8679876245,-2.2528599574  
O,0,2.796051203,0.3733597139,-2.4118368817  
C,0,2.7866344848,0.9295161946,-3.6201584389  
O,0,2.2101830471,0.4845457872,-4.5935833724  
C,0,3.6191443785,2.2068828839,-3.5671505481  
N,0,3.7107970344,2.9914219293,-4.8544286647  
C,0,4.4103552921,2.1838482363,-5.9250945069  
C,0,4.5409646282,4.2207797237,-4.5643798171  
C,0,2.3262510403,3.4247968442,-5.3935402348  
C,0,1.4863126127,4.1776356596,-4.4056544417  
C,0,1.1679050496,5.4671008014,-4.554365488  
H,0,2.1935558471,-1.1452895965,-1.2100951562  
H,0,1.0021855652,-0.7004035175,-2.4761365337  
H,0,2.4682535926,-1.6301854027,-2.9159062534  
H,0,4.6375253279,1.9449305258,-3.2716426849  
H,0,3.2132958016,2.8646222135,-2.7970340897  
H,0,3.8146491992,1.3023683994,-6.1476028198  
H,0,4.5123832558,2.8093184031,-6.811184128  
H,0,5.3951058772,1.9001245027,-5.5543718602  
H,0,5.5183560127,3.9047600312,-4.201976995  
H,0,4.6488202376,4.7870184544,-5.4884684017  
H,0,4.0330690572,4.8230334041,-3.8135731996  
H,0,2.5436130135,4.0329539254,-6.2726125778  
H,0,1.839026617,2.5017043708,-5.7069289851  
H,0,1.065428755,3.6148788878,-3.5752533719  
H,0,1.5457673256,6.0597966939,-5.3838872164  
H,0,0.5066866416,5.9657865549,-3.8525963752

**TS- B3LYP/6-31+G\*\*/PCM**

/home/bibaswanbiswas/c8/Parentcalcs/23parentTSB3LYPS  
S

23 parent ts  
B3LYP/6-31+G\*\*  
E(RB3LYP) = -519.030461902

Zero-point correction= 0.222429 (Hartree/Particle)  
Thermal correction to Energy= 0.235288  
Thermal correction to Enthalpy= 0.236233  
Thermal correction to Gibbs Free Energy= 0.183971  
Sum of electronic and ZPE= -518.808033  
Sum of electronic and thermal Energies= -518.795173

Sum of electronic and thermal Enthalpies= -518.794229  
Sum of electronic and thermal Free Energies= -518.846491

| E             | CV        | S         |
|---------------|-----------|-----------|
| KCal/Mol      | Cal/Mol-K | Cal/Mol-K |
| Total 147.646 | 47.282    | 109.994   |

C,0,2.0464163806,-0.8404928319,-2.3029579915  
O,0,2.7308080223,0.4128404119,-2.4453893647  
C,0,2.8273741842,0.9117607462,-3.7266111398  
C,0,3.4654026925,2.1860789655,-3.7255076312  
N,0,3.8208471062,2.8832849213,-4.8665259223  
C,0,4.7132744981,4.0259671603,-4.5688935975  
O,0,2.385320975,0.2721326076,-4.6948047545  
C,0,4.2960271129,2.1187232574,-6.0443986626  
C,0,2.1168394678,3.8755825629,-5.6983323958  
C,0,1.4889082395,4.2807756554,-4.5022817705  
C,0,0.9065949286,3.3672315433,-3.6656474406  
H,0,2.0705016078,-1.0656095875,-1.2364122536  
H,0,1.0109504262,-0.7627408857,-2.6459924636  
H,0,2.5524331476,-1.6306357383,-2.864208327  
H,0,3.6923551141,2.6497326321,-2.7772679816  
H,0,5.2871383863,1.7019403186,-5.831547437  
H,0,3.5995235294,1.3120250644,-6.2565750038  
H,0,4.3628180595,2.7974072509,-6.8962440417  
H,0,5.6789058711,3.6583667551,-4.2041153657  
H,0,4.8653966213,4.6111560314,-5.4760087306  
H,0,4.2529195316,4.6535375176,-3.8050270754  
H,0,2.5806312337,4.6083004309,-6.3521704184  
H,0,1.7818858019,2.9624588415,-6.1804654629  
H,0,1.6691797097,5.2912043751,-4.1376569459  
H,0,0.6507166766,2.372773325,-4.0152556285  
H,0,0.5610846756,3.643659669,-2.673742193

**TS- UB3LYP/6-31+G\*\*/PCM**

/home/bibaswanbiswas/c8/Parentcalcs/tsUB3BBPCM  
sean allyl ester checking ts for u instability

UB3LYP/6-31+G\*\*  
E(UB3LYP) = -519.030461924

Zero-point correction= 0.222428 (Hartree/Particle)  
Thermal correction to Energy= 0.235288  
Thermal correction to Enthalpy= 0.236232  
Thermal correction to Gibbs Free Energy= 0.183970  
Sum of electronic and ZPE= -518.808034  
Sum of electronic and thermal Energies= -518.795174  
Sum of electronic and thermal Enthalpies= -518.794230  
Sum of electronic and thermal Free Energies= -518.846492

| E             | CV        | S         |
|---------------|-----------|-----------|
| KCal/Mol      | Cal/Mol-K | Cal/Mol-K |
| Total 147.646 | 47.283    | 109.995   |

C,0,2.047329036,-0.8406727389,-2.3028548348  
O,0,2.7309139453,0.4131264398,-2.4450550182  
C,0,2.8281345915,0.9117958482,-3.7263243397  
C,0,3.4652710447,2.1865658354,-3.7250375863  
N,0,3.8208861261,2.8837848455,-4.8659889232  
C,0,4.7121228876,4.0273148946,-4.5680549793  
O,0,2.387296342,0.2716067618,-4.6947099101

C,0,4.2975640363,2.1193084221,-6.0433107027  
 C,0,2.1166392585,3.8743420473,-5.6992785075  
 C,0,1.4875970393,4.2797034653,-4.5038563906  
 C,0,0.9052483996,3.3662262677,-3.667178332  
 H,0,2.0707028621,-1.0654902546,-1.2362301607  
 H,0,1.0120884651,-0.7637757561,-2.6467620919  
 H,0,2.5543888488,-1.6305924017,-2.8634787924  
 H,0,3.6910951999,2.6506593498,-2.7767433707  
 H,0,5.2888856181,1.7034435374,-5.8296467996  
 H,0,3.6019095276,1.3119464055,-6.2557469716  
 H,0,4.3643700568,2.7978070455,-6.8953023339  
 H,0,5.6778752369,3.6606342205,-4.2026724884  
 H,0,4.8642304205,4.6124870415,-5.4751830084  
 H,0,4.2507787726,4.6546005885,-3.8045531044  
 H,0,2.5802828342,4.6070790157,-6.3531957333  
 H,0,1.7826712835,2.9607167835,-6.1811562034  
 H,0,1.6668758242,5.2904577714,-4.1396453837  
 H,0,0.6502713104,2.371407809,-4.0163929492  
 H,0,0.5588250323,3.6429777555,-2.6756810841

### Cation- M06/6-31+G\*\*/PCM-Conf2

/home/bibaswanbiswas/c8/Parentcalcs/23parentSM2M06S  
 S

parent sm  
 M06/6-31+G\*\*  
 E(RM06) = -519.180677407

Zero-point correction= 0.239200 (Hartree/Particle)  
 Thermal correction to Energy= 0.251979  
 Thermal correction to Enthalpy= 0.252923  
 Thermal correction to Gibbs Free Energy= 0.200158  
 Sum of electronic and ZPE= -518.941477  
 Sum of electronic and thermal Energies= -518.928698  
 Sum of electronic and thermal Enthalpies= -518.927754  
 Sum of electronic and thermal Free Energies= -518.980519

| E             | CV        | S         |
|---------------|-----------|-----------|
| KCal/Mol      | Cal/Mol-K | Cal/Mol-K |
| Total 158.119 | 47.201    | 111.054   |

C,0,2.0548077151,-0.8069902191,-2.2666049013  
 O,0,2.8042002784,0.4132329487,-2.4169704966  
 C,0,2.7767769764,0.9741099188,-3.6145031516  
 O,0,2.1789685075,0.5448848039,-4.5756764332  
 C,0,3.6117059705,2.234379581,-3.5719550411  
 N,0,3.7059292067,2.9892979165,-4.8615985659  
 C,0,4.4132653722,2.1714935893,-5.9030286037  
 C,0,4.5220684648,4.2184481893,-4.5911351054  
 C,0,2.3363538577,3.4068587399,-5.4182216501  
 C,0,1.4685027424,4.0941182983,-4.4220648267  
 C,0,1.2035284449,5.3984864012,-4.4817630139  
 H,0,2.2212763118,-1.1280261754,-1.2401402504  
 H,0,0.9941604072,-0.6152356987,-2.4434531556  
 H,0,2.4205114662,-1.5582436038,-2.9699646958  
 H,0,4.6313822239,1.9732069988,-3.2679626584  
 H,0,3.2109844681,2.9064684808,-2.8059489456  
 H,0,3.8331762872,1.270505657,-6.1036627102  
 H,0,4.5018498274,2.7754423874,-6.8082184424

H,0,5.4062535888,1.9163463418,-5.5270639405  
 H,0,5.4974961666,3.9149976588,-4.2064444092  
 H,0,4.6421597563,4.7641830166,-5.5287204052  
 H,0,4.0035202716,4.8397068741,-3.8590811267  
 H,0,2.5659587835,4.0587900065,-6.2673954754  
 H,0,1.8777191292,2.4867097177,-5.7875349027  
 H,0,0.9930654158,3.4773129776,-3.6584156872  
 H,0,1.6432417987,6.0330394061,-5.2506616709  
 H,0,0.530168561,5.8737937869,-3.7741327345

### TS-M06/6-31+G\*\*/PCM

/home/bibaswanbiswas/c8/Parentcalcs/23parentTSM06SS  
 23 parent ts  
 M06/6-31+G\*\*  
 E(RM06) = -518.672218980

Zero-point correction= 0.221419 (Hartree/Particle)  
 Thermal correction to Energy= 0.234073  
 Thermal correction to Enthalpy= 0.235017  
 Thermal correction to Gibbs Free Energy= 0.183564  
 Sum of electronic and ZPE= -518.450800  
 Sum of electronic and thermal Energies= -518.438146  
 Sum of electronic and thermal Enthalpies= -518.437202  
 Sum of electronic and thermal Free Energies= -518.488655

| E             | CV        | S         |
|---------------|-----------|-----------|
| KCal/Mol      | Cal/Mol-K | Cal/Mol-K |
| Total 146.883 | 47.194    | 108.293   |

C,0,1.9671225433,-0.7456365185,-2.3212418089  
 O,0,2.7121118167,0.4575732541,-2.4580435898  
 C,0,2.8440248132,0.9307112903,-3.732700632  
 C,0,3.4751729877,2.2072828396,-3.7317548961  
 N,0,3.8260521409,2.8911200613,-4.8750453534  
 C,0,4.6869114038,4.0455297489,-4.5899015879  
 O,0,2.4203389841,0.2898949598,-4.6977734322  
 C,0,4.3115944948,2.1371405277,-6.0405883066  
 C,0,2.0913624163,3.8466371973,-5.6885836532  
 C,0,1.5051064714,4.2034505334,-4.47035176  
 C,0,1.0287798396,3.2294026594,-3.6338746784  
 H,0,1.9471634658,-0.9677734744,-1.2533398869  
 H,0,0.9449958083,-0.6159793616,-2.6939085579  
 H,0,2.4399600841,-1.5706304821,-2.8634277195  
 H,0,3.7157110883,2.6684792338,-2.7808011922  
 H,0,5.3160508015,1.7448935292,-5.832348679  
 H,0,3.6342971012,1.3108832667,-6.2522231421  
 H,0,4.3585222749,2.814341629,-6.8985471319  
 H,0,5.660634486,3.7030408787,-4.2154868607  
 H,0,4.8331125829,4.6257257532,-5.5046068256  
 H,0,4.2105695377,4.6764772218,-3.83445581  
 H,0,2.5305003811,4.5955002016,-6.34566916  
 H,0,1.7864595411,2.9165570342,-6.1672448899  
 H,0,1.6757988694,5.2073624813,-4.0784145853  
 H,0,0.755718025,2.2514859249,-4.0250261538  
 H,0,0.7361820408,3.44399061,-2.6086797064

### Cation/ APFD/6-31G\*/PCM- Conf2

/home/bibaswanbiswas/c8/Parentcalcs/SM2APFDPCMSB  
 parent sm conf 2



APFD/6-31G\*

E(RAPFD) = -519.085647732

Zero-point correction= 0.242905 (Hartree/Particle)

Zero-point correction= 0.242996  
 (Hartree/Particle)  
 Thermal correction to Energy= 0.255824  
 Thermal correction to Enthalpy= 0.256768  
 Thermal correction to Gibbs Free Energy= 0.203415  
 Sum of electronic and zero-point Energies= -518.842652  
 Sum of electronic and thermal Energies= -518.829824  
 Sum of electronic and thermal Enthalpies= -518.828880  
 Sum of electronic and thermal Free Energies= -518.882233

|        | E (Thermal) | CV             | S        |
|--------|-------------|----------------|----------|
|        | KCal/Mol    | Cal/Mol-Kelvin | Cal/Mol- |
| Kelvin |             |                |          |
| Total  | 160.532     | 46.701         | 112.290  |

C,0,2.0183189617,-0.7563565164,-2.2586730326  
 O,0,2.783518533,0.4524034038,-2.4162229495  
 C,0,2.7726308215,0.990634896,-3.6254178874  
 O,0,2.1802290993,0.5560312753,-4.5893280946  
 C,0,3.6274444359,2.248747365,-3.5886001182  
 N,0,3.724240861,2.9927182072,-4.8841586239  
 C,0,4.4336071642,2.1683038338,-5.9128069429  
 C,0,4.5221686616,4.2309961967,-4.6201075918  
 C,0,2.3519752871,3.3926952127,-5.4379188305  
 C,0,1.4611410001,4.0278132734,-4.4203097719  
 C,0,1.2125089887,5.3376025827,-4.3961435796  
 H,0,2.148582737,-1.0447555898,-1.2176588233  
 H,0,0.9664810655,-0.5634547827,-2.4784109112  
 H,0,2.4015097069,-1.5307037398,-2.9260566854  
 H,0,4.642483961,1.9820335843,-3.2834641281  
 H,0,3.2264065853,2.9326792008,-2.8367244642  
 H,0,3.8735290519,1.2491854106,-6.0709807328  
 H,0,4.4876566496,2.7439202271,-6.8371083068  
 H,0,5.4386792253,1.9496631447,-5.5509136004  
 H,0,5.4847540738,3.9470314827,-4.1949516377  
 H,0,4.6709763197,4.7542775452,-5.564401883  
 H,0,3.9690042536,4.8623971795,-3.925276023  
 H,0,2.5680434967,4.0716730628,-6.265397622  
 H,0,1.9161958184,2.4742042832,-5.8307330849  
 H,0,0.9671782519,3.3652974542,-3.7112520088  
 H,0,1.6693150965,6.0208992862,-5.1090504213  
 H,0,0.5304518925,5.7713805207,-3.6702552443

**TS/ APFD /6-31G\*/PCM**

/home/bibaswanbiswas/c8/Parentcalcs/TSAPFDPCMSB  
 parent ts exo s-cis  
 APFD/6-31G\*  
 E(RAPFD) = -518.566897926

Zero-point correction= 0.225645 (Hartree/Particle)

Thermal correction to Energy= 0.237974

Thermal correction to Enthalpy= 0.238919

Thermal correction to Gibbs Free Energy= 0.188069

Sum of electronic and ZPE= -518.341253

Sum of electronic and thermal Energies= -518.328924

Sum of electronic and thermal Enthalpies= -518.327979

Sum of electronic and thermal Free Energies= -518.378829

|       | E        | CV        | S         |
|-------|----------|-----------|-----------|
|       | KCal/Mol | Cal/Mol-K | Cal/Mol-K |
| Total | 149.331  | 46.128    | 107.023   |

C,0,1.9999359942,-0.7903283736,-2.3782242315  
 O,0,2.724075863,0.4282193717,-2.4803738468  
 C,0,2.7932427007,0.9588664256,-3.7396778803  
 C,0,3.4471177992,2.2200405452,-3.7171421347  
 N,0,3.7906714559,2.902620653,-4.8711210136  
 C,0,4.6445197283,4.0610883551,-4.5793847854  
 O,0,2.2970650728,0.3821402607,-4.7136473317  
 C,0,4.3177508345,2.121031544,-6.001274973  
 C,0,2.1296616196,3.7761281229,-5.6826316634  
 C,0,1.5216866715,4.2387279153,-4.5008074724  
 C,0,1.0648429184,3.3165133145,-3.5990562224  
 H,0,2.0420203736,-1.0731350642,-1.3253564313  
 H,0,0.957625708,-0.6606409401,-2.6871834842  
 H,0,2.4517285474,-1.5749545574,-2.9932142948  
 H,0,3.7491126643,2.6509222832,-2.7736548576  
 H,0,5.3328072622,1.7806811562,-5.769042725  
 H,0,3.6691185765,1.2642236736,-6.1693754564  
 H,0,4.3401269643,2.7583378302,-6.8883837478  
 H,0,5.598417391,3.7249494313,-4.1587574329  
 H,0,4.8254445606,4.618514077,-5.4998888252  
 H,0,4.1336678089,4.7045138586,-3.86065706  
 H,0,2.5457282208,4.4748511898,-6.4058321653  
 H,0,1.7885709799,2.8312582183,-6.1005542062  
 H,0,1.6947151192,5.2671323759,-4.1841812319  
 H,0,0.7803345964,2.3212922128,-3.9259764806  
 H,0,0.7742645687,3.5944671207,-2.5886400456

**Cation-B3LYPGD2/6-31G\*/PCM-Conf2**

/home/bibaswanbiswas/c8/Parentcalcs/SM2B3LYPPCMSB  
 GD2

parent sm conf 2

B3LYP/6-31G\*

E(RB3LYP) = -519.541373957

Zero-point correction= 0.241730  
 (Hartree/Particle)  
 Thermal correction to Energy= 0.254499  
 Thermal correction to Enthalpy= 0.255443  
 Thermal correction to Gibbs Free Energy= 0.202324  
 Sum of electronic and zero-point Energies= -519.299644  
 Sum of electronic and thermal Energies= -519.286875  
 Sum of electronic and thermal Enthalpies= -519.285931  
 Sum of electronic and thermal Free Energies= -519.339050

|  | E (Thermal) | CV | S |
|--|-------------|----|---|
|--|-------------|----|---|

|        | KCal/Mol | Cal/Mol-Kelvin | Cal/Mol- |
|--------|----------|----------------|----------|
| Kelvin |          |                |          |
| Total  | 159.700  | 46.763         | 111.799  |

C,0,2.0243628679,-0.7919076275,-2.2532830939  
O,0,2.7865950862,0.433093851,-2.4083865448  
C,0,2.7742874194,0.9772896663,-3.6200782559  
O,0,2.1850053133,0.5363738108,-4.5857019749  
C,0,3.6207420756,2.2452731397,-3.5782450973  
N,0,3.7189823465,2.9936657389,-4.8805134428  
C,0,4.4358886691,2.1676469014,-5.9167961454  
C,0,4.5225235979,4.2396631405,-4.6137503115  
C,0,2.3385480653,3.3982602508,-5.4408430236  
C,0,1.4630749419,4.0570411579,-4.4204759789  
C,0,1.2142234089,5.3679042803,-4.4239178528  
H,0,2.1579478252,-1.0801010673,-1.2111689693  
H,0,0.9719318482,-0.6007518815,-2.4773951853  
H,0,2.4169941438,-1.5573120149,-2.9273356856  
H,0,4.6386395063,1.9888258649,-3.2746498205  
H,0,3.206984996,2.9282181215,-2.8331777256  
H,0,3.8570528482,1.2632670978,-6.0940687402  
H,0,4.510977935,2.764922138,-6.826837298  
H,0,5.4299227803,1.9305181398,-5.5336768218  
H,0,5.4903540485,3.9443468648,-4.2061509834  
H,0,4.6502483999,4.765782228,-5.5604776327  
H,0,3.9721274981,4.8580057597,-3.9044527152  
H,0,2.5634059103,4.0666819261,-6.2744082265  
H,0,1.8980259783,2.4744892804,-5.8135487545  
H,0,0.99476643,3.4102260052,-3.6818103797  
H,0,1.6569719606,6.0269948334,-5.1680700052  
H,0,0.5484460989,5.8189003941,-3.6931023349

### TS/ B3LYPGD2 /6-31G\*/PCM

/home/bibaswanbiswas/c8/Parentcalcs/TSB3LYPPCMSBG  
D2  
parent ts exo s-cis  
B3LYP/6-31G\*  
E(RB3LYP) = -519.022559409

Zero-point correction= 0.223789 (Hartree/Particle)  
Thermal correction to Energy= 0.236342  
Thermal correction to Enthalpy= 0.237287  
Thermal correction to Gibbs Free Energy= 0.185860  
Sum of electronic and ZPE= -518.798770  
Sum of electronic and thermal Energies= -518.786217  
Sum of electronic and thermal Enthalpies= -518.785273  
Sum of electronic and thermal Free Energies= -518.836700

|       | E        | CV        | S         |
|-------|----------|-----------|-----------|
|       | KCal/Mol | Cal/Mol-K | Cal/Mol-K |
| Total | 148.307  | 46.622    | 108.237   |

C,0,1.9841384717,-0.8034473331,-2.3646308064  
O,0,2.7305885842,0.4133293752,-2.4658945835  
C,0,2.8094879254,0.9454087977,-3.7311980735  
C,0,3.4880055004,2.197521651,-3.7104448392  
N,0,3.8269326628,2.8868539471,-4.8594396022  
C,0,4.6582953075,4.0715292515,-4.5795028541  
O,0,2.3061396933,0.3691158586,-4.705045214  
C,0,4.336690105,2.1240451039,-6.0181670759

C,0,2.1022583012,3.781443345,-5.6952081653  
C,0,1.5171272083,4.2363656361,-4.5009133427  
C,0,1.0294298577,3.3281291338,-3.5984179891  
H,0,2.0219181727,-1.0864147652,-1.310154135  
H,0,0.9450218547,-0.6537457208,-2.6792861075  
H,0,2.4285853592,-1.5899645775,-2.9844391755  
H,0,3.7639138356,2.6396956,-2.7647136647  
H,0,5.3549129896,1.7746496052,-5.8048097841  
H,0,3.6780988972,1.2763819795,-6.1963593004  
H,0,4.3485243365,2.788623082,-6.8863113399  
H,0,5.6298919205,3.758149816,-4.1776342263  
H,0,4.8017149926,4.6310221409,-5.5063804205  
H,0,4.1384763177,4.696803853,-3.8497345584  
H,0,2.5377515118,4.4768759158,-6.4079743698  
H,0,1.7830612279,2.8236241043,-6.0977192485  
H,0,1.7001065178,5.2629118754,-4.1852737898  
H,0,0.7581176035,2.3284396361,-3.9210927846  
H,0,0.7350648453,3.6201136888,-2.5932945491

### Cation/ PBEGD2/6-31G\*/PCM- Conf2

/home/bibaswanbiswas/c8/Parentcalcs/SM2PBEPCMSBG  
D2  
parent sm conf 2  
PBEPBE/6-31G\*  
E(RPBE-PBE) = -518.871680499  
Zero-point correction= 0.234868  
(Hartree/Particle)  
Thermal correction to Energy= 0.247970  
Thermal correction to Enthalpy= 0.248915  
Thermal correction to Gibbs Free Energy= 0.195083  
Sum of electronic and zero-point Energies= -  
518.636813  
Sum of electronic and thermal Energies= -  
518.623710  
Sum of electronic and thermal Enthalpies= -  
518.622766  
Sum of electronic and thermal Free Energies= -  
518.676598

|                                              | E (Thermal) | CV             | S        |
|----------------------------------------------|-------------|----------------|----------|
|                                              | KCal/Mol    | Cal/Mol-Kelvin | Cal/Mol- |
| Kelvin                                       |             |                |          |
| Total                                        | 155.604     | 48.161         | 113.299  |
| C,0,2.0157960413,-0.8005460685,-2.259521803  |             |                |          |
| O,0,2.7753264908,0.434631849,-2.3930369619   |             |                |          |
| C,0,2.7876740065,0.9638435832,-3.6232436459  |             |                |          |
| O,0,2.222020114,0.4992189312,-4.6047580961   |             |                |          |
| C,0,3.630211618,2.2393272993,-3.5740167089   |             |                |          |
| N,0,3.7218534521,2.993383041,-4.8777132949   |             |                |          |
| C,0,4.4351039459,2.1714566594,-5.9220547593  |             |                |          |
| C,0,4.5192011544,4.2450448066,-4.6121206001  |             |                |          |
| C,0,2.3280139852,3.3889722174,-5.4245152391  |             |                |          |
| C,0,1.4696399951,4.071823844,-4.4044688026   |             |                |          |
| C,0,1.2173594287,5.3910903066,-4.4363321089  |             |                |          |
| H,0,2.1231660248,-1.0878851992,-1.2059393391 |             |                |          |
| H,0,0.9604244096,-0.6184223603,-2.5155440767 |             |                |          |
| H,0,2.4350771446,-1.5703324189,-2.9259240829 |             |                |          |
| H,0,4.6590413274,1.9876644927,-3.2707131399  |             |                |          |
| H,0,3.2137805644,2.926878081,-2.8211485489   |             |                |          |
| H,0,3.8553733265,1.2562010875,-6.0939930484  |             |                |          |

H,0,4.4984008316,2.773090478,-6.8399194091  
 H,0,5.4419370056,1.9390959301,-5.5462570314  
 H,0,5.496613589,3.9537527109,-4.2024603633  
 H,0,4.6450457925,4.7765712267,-5.5657200612  
 H,0,3.9619987634,4.866264485,-3.8972117085  
 H,0,2.5420656573,4.0418079645,-6.2845928805  
 H,0,1.8814734555,2.4461685702,-5.7709866017  
 H,0,1.0050790963,3.4389682206,-3.6386228657  
 H,0,1.6516186757,6.0368741308,-5.2088701392  
 H,0,0.5557361033,5.8623741312,-3.7026376832

### TS/ PBEGD2 /6-31G\*/PCM

/home/bibaswanbiswas/c8/Parentcalcs/TSPBEPMSBGD2  
 parent ts exo s-cis  
 PBEPBE/6-31G\*  
 E(RPBE-PBE) = -518.366686658

Zero-point correction= 0.217743 (Hartree/Particle)  
 Thermal correction to Energy= 0.230580  
 Thermal correction to Enthalpy= 0.231524  
 Thermal correction to Gibbs Free Energy= 0.179576  
 Sum of electronic and ZPE= -518.148943  
 Sum of electronic and thermal Energies= -518.136107  
 Sum of electronic and thermal Enthalpies= -518.135163  
 Sum of electronic and thermal Free Energies= -518.187111

| E             | CV        | S         |
|---------------|-----------|-----------|
| KCal/Mol      | Cal/Mol-K | Cal/Mol-K |
| Total 144.691 | 47.902    | 109.334   |

Charge = 0 Multiplicity = 1

Redundant internal coordinates found in file.  
 C,0,1.9839941672,-0.8238953816,-2.3879762833  
 O,0,2.7462379833,0.3909225266,-2.4619780914  
 C,0,2.8138799616,0.9415034663,-3.7339240465  
 C,0,3.512256651,2.186830635,-3.7029674964  
 N,0,3.8217363723,2.8933790112,-4.8604243743  
 C,0,4.6485280814,4.086594473,-4.580972098  
 O,0,2.2895198387,0.3793309889,-4.7176634904  
 C,0,4.3444002213,2.1253717268,-6.0155616537  
 C,0,2.1290251253,3.7348790411,-5.6796562045  
 C,0,1.5228969361,4.248239435,-4.5060652547  
 C,0,1.0093374492,3.3800916472,-3.5722620424  
 H,0,2.0312180916,-1.1383415507,-1.334552077  
 H,0,0.9343110498,-0.6555191317,-2.6883834426  
 H,0,2.4129977755,-1.6053567766,-3.0396206638  
 H,0,3.7778943679,2.6441416502,-2.7515215968  
 H,0,5.3774909427,1.7995882649,-5.7988545657  
 H,0,3.694596986,1.2546422646,-6.1730464772  
 H,0,4.3362173385,2.7806279924,-6.9009857084  
 H,0,5.6283446134,3.7745595685,-4.1777785109  
 H,0,4.7878866182,4.6514458441,-5.5147817265  
 H,0,4.1208244515,4.7112693644,-3.8440656529  
 H,0,2.5517500004,4.4083759268,-6.43401332  
 H,0,1.7872167351,2.760957932,-6.0499889163  
 H,0,1.6988089994,5.2975108385,-4.2346079485  
 H,0,0.7581669772,2.3531434205,-3.8539257808  
 H,0,0.6947162655,3.7171678227,-2.5784625765

### Cation/ BLYPGD2/6-31G\*/PCM- Conf2

/home/bibaswanbiswas/c8/Parentcalcs/SM2BLYPPCMSB  
 GD2  
 parent sm conf 2  
 BLYP/6-31G\*  
 E(RB-LYP) = -519.318058822  
 Zero-point correction= 0.233919  
 (Hartree/Particle)  
 Thermal correction to Energy= 0.247103  
 Thermal correction to Enthalpy= 0.248047  
 Thermal correction to Gibbs Free Energy= 0.193936  
 Sum of electronic and zero-point Energies= -  
 519.084140  
 Sum of electronic and thermal Energies= -  
 519.070956  
 Sum of electronic and thermal Enthalpies= -  
 519.070011  
 Sum of electronic and thermal Free Energies= -  
 519.124123

|                                              | E (Thermal) | CV             | S        |
|----------------------------------------------|-------------|----------------|----------|
|                                              | KCal/Mol    | Cal/Mol-Kelvin | Cal/Mol- |
| Kelvin                                       |             |                |          |
| Total                                        | 155.060     | 48.455         | 113.887  |
| C,0,2.0041728129,-0.8228240244,-2.2375598515 |             |                |          |
| O,0,2.7734811555,0.4229584498,-2.384605604   |             |                |          |
| C,0,2.7817368085,0.9561892662,-3.6206278081  |             |                |          |
| O,0,2.2091801894,0.4958601335,-4.6033807637  |             |                |          |
| C,0,3.6338781119,2.2364996479,-3.5697890405  |             |                |          |
| N,0,3.7286346218,2.9976305148,-4.884480686   |             |                |          |
| C,0,4.449995304,2.1687442835,-5.9376990194   |             |                |          |
| C,0,4.5348108986,4.2593863449,-4.6143772208  |             |                |          |
| C,0,2.3214234254,3.4022957897,-5.4428439441  |             |                |          |
| C,0,1.4551135414,4.0745368314,-4.4130876063  |             |                |          |
| C,0,1.2034998329,5.3957209692,-4.4281312122  |             |                |          |
| H,0,2.1201118612,-1.1002658804,-1.1826406054 |             |                |          |
| H,0,0.9495980107,-0.6349433884,-2.4898350781 |             |                |          |
| H,0,2.4210012842,-1.5930936639,-2.903881832  |             |                |          |
| H,0,4.6617394072,1.9826980773,-3.2714756431  |             |                |          |
| H,0,3.217062738,2.925539828,-2.821724227     |             |                |          |
| H,0,3.8674833378,1.2570710113,-6.109101532   |             |                |          |
| H,0,4.5137861055,2.7749741947,-6.851305808   |             |                |          |
| H,0,5.4536038395,1.9370730388,-5.5554789269  |             |                |          |
| H,0,5.5091528003,3.9615408786,-4.2047158583  |             |                |          |
| H,0,4.6592040139,4.7875739605,-5.5687708317  |             |                |          |
| H,0,3.9748740318,4.8759525996,-3.8998753832  |             |                |          |
| H,0,2.5459508845,4.0650933113,-6.290209379   |             |                |          |
| H,0,1.8832056282,2.4625837774,-5.7998416262  |             |                |          |
| H,0,0.9957832088,3.4307209426,-3.6556577273  |             |                |          |
| H,0,1.6384876266,6.049803116,-5.1917726866   |             |                |          |
| H,0,0.5420605193,5.8579979901,-3.6894530992  |             |                |          |

### TS/ BLYPGD2 /6-31G\*/PCM

/home/bibaswanbiswas/c8/Parentcalcs/TSBLYPPCMSB  
 D2  
 parent ts exo s-cis  
 BLYP/6-31G\*  
 E(RB-LYP) = -518.811650515

Zero-point correction= 0.216786 (Hartree/Particle)  
 Thermal correction to Energy= 0.229707

Thermal correction to Enthalpy= 0.230651  
 Thermal correction to Gibbs Free Energy= 0.178524  
 Sum of electronic and ZPE= -518.594865  
 Sum of electronic and thermal Energies= -518.581944  
 Sum of electronic and thermal Enthalpies= -518.580999  
 Sum of electronic and thermal Free Energies= -518.633126

| E             | CV        | S         |
|---------------|-----------|-----------|
| KCal/Mol      | Cal/Mol-K | Cal/Mol-K |
| Total 144.143 | 48.136    | 109.711   |

C,0,1.9450451684,-0.830533539,-2.3951735216  
 O,0,2.7697226486,0.3574345904,-2.4680368836  
 C,0,2.8434892981,0.9344973867,-3.7423573283  
 C,0,3.6039148659,2.1415029095,-3.7040441176  
 N,0,3.8557261059,2.8869726922,-4.8635268064  
 C,0,4.6582032905,4.1119035536,-4.5823143321  
 O,0,2.2779407524,0.4101393278,-4.7310462835  
 C,0,4.3946112479,2.1436322123,-6.0455983809  
 C,0,2.1186771046,3.6650252288,-5.6545507253  
 C,0,1.5045188163,4.2291469374,-4.4966712143  
 C,0,0.9477473192,3.4214647168,-3.5371045034  
 H,0,1.9997791953,-1.1612335012,-1.3471694754  
 H,0,0.8997680792,-0.6052622985,-2.6718462477  
 H,0,2.324243255,-1.6192484136,-3.0680275947  
 H,0,3.85450302,2.6048007489,-2.7529712644  
 H,0,5.4354475643,1.8424688055,-5.8349196462  
 H,0,3.7643413756,1.2624096925,-6.2107489736  
 H,0,4.3634858091,2.8143074222,-6.9179121175  
 H,0,5.6532857225,3.8210011305,-4.2037005386  
 H,0,4.7590680101,4.6890046122,-5.5124521018  
 H,0,4.1245661842,4.7068148015,-3.8270799235  
 H,0,2.5231184535,4.3140257226,-6.4372001446  
 H,0,1.7831924062,2.6753770674,-5.9786739852  
 H,0,1.6663827717,5.2928985009,-4.2832253784  
 H,0,0.7394087313,2.3708296823,-3.7513726391  
 H,0,0.6040668045,3.8180810102,-2.5763158721

### Cation/ BP86GD2/6-31G\*/PCM- Conf2

/home/bibaswanbiswas/c8/Parentcalcs/SM2BP86PCMSBG  
 D2  
 parent sm conf 2  
 BP86/6-31G\*  
 E(RB-P86) = -519.527335985  
 Zero-point correction= 0.234056  
 (Hartree/Particle)  
 Thermal correction to Energy= 0.247167  
 Thermal correction to Enthalpy= 0.248111  
 Thermal correction to Gibbs Free Energy= 0.194269  
 Sum of electronic and zero-point Energies= -  
 519.293280  
 Sum of electronic and thermal Energies= -  
 519.280169  
 Sum of electronic and thermal Enthalpies= -  
 519.279225  
 Sum of electronic and thermal Free Energies= -  
 519.333067

| E (Thermal) | CV | S |
|-------------|----|---|
|-------------|----|---|

|                                              | KCal/Mol | Cal/Mol-Kelvin | Cal/Mol-<br>Kelvin |
|----------------------------------------------|----------|----------------|--------------------|
| Total                                        | 155.099  | 48.247         | 113.319            |
| C,0,2.0129905536,-0.806028919,-2.2561888253  |          |                |                    |
| O,0,2.7719166871,0.4355540545,-2.3902539509  |          |                |                    |
| C,0,2.7869913935,0.9630266253,-3.6230404905  |          |                |                    |
| O,0,2.2251143039,0.495005513,-4.6066354132   |          |                |                    |
| C,0,3.6283368292,2.242270385,-3.57255966     |          |                |                    |
| N,0,3.7202529208,2.9942640214,-4.8801700265  |          |                |                    |
| C,0,4.4386938758,2.170663897,-5.9237452049   |          |                |                    |
| C,0,4.5151158136,4.2512866147,-4.6155888788  |          |                |                    |
| C,0,2.3235901342,3.3861862608,-5.4308281665  |          |                |                    |
| C,0,1.4664325839,4.0684916027,-4.4060942262  |          |                |                    |
| C,0,1.228062736,5.3916569398,-4.4293259876   |          |                |                    |
| H,0,2.1194820968,-1.0897703338,-1.2004945906 |          |                |                    |
| H,0,0.957584927,-0.6247156969,-2.5167140087  |          |                |                    |
| H,0,2.4385992842,-1.5743627328,-2.9218522211 |          |                |                    |
| H,0,4.6584255489,1.993723304,-3.2683764725   |          |                |                    |
| H,0,3.2066185688,2.9319763466,-2.823487024   |          |                |                    |
| H,0,3.8577635518,1.2550263589,-6.0951921259  |          |                |                    |
| H,0,4.502871181,2.7744993353,-6.8413115718   |          |                |                    |
| H,0,5.4448379724,1.9402449393,-5.5420096337  |          |                |                    |
| H,0,5.4940690489,3.960945586,-4.20618961     |          |                |                    |
| H,0,4.6365627206,4.7811093272,-5.5718257214  |          |                |                    |
| H,0,3.9532081674,4.8695144853,-3.9002772688  |          |                |                    |
| H,0,2.5394161728,4.0405015702,-6.29045421    |          |                |                    |
| H,0,1.8806807854,2.4405551591,-5.7760013263  |          |                |                    |
| H,0,0.9996498195,3.4333242234,-3.6427493112  |          |                |                    |
| H,0,1.669481779,6.0363327894,-5.2000458559   |          |                |                    |
| H,0,0.5722825436,5.8660363434,-3.6909112178  |          |                |                    |

### TS/ BP86GD2 /6-31G\*/PCM

/home/bibaswanbiswas/c8/Parentcalcs/TSBP86PCMSBG  
 2  
 parent ts exo s-cis  
 BP86/6-31G\*  
 E(RB-P86) = -519.021844990

Zero-point correction= 0.216846 (Hartree/Particle)  
 Thermal correction to Energy= 0.229709  
 Thermal correction to Enthalpy= 0.230654  
 Thermal correction to Gibbs Free Energy= 0.178653  
 Sum of electronic and ZPE= -518.804999  
 Sum of electronic and thermal Energies= -518.792136  
 Sum of electronic and thermal Enthalpies= -518.791191  
 Sum of electronic and thermal Free Energies= -518.843192

| E             | CV        | S         |
|---------------|-----------|-----------|
| KCal/Mol      | Cal/Mol-K | Cal/Mol-K |
| Total 144.145 | 48.034    | 109.444   |

C,0,1.9754168932,-0.8287999233,-2.3896795892  
 O,0,2.7444856205,0.3872940752,-2.460900231  
 C,0,2.812249073,0.9426429397,-3.7330465669  
 C,0,3.5156023018,2.1868405879,-3.6994277285  
 N,0,3.8275202427,2.8914014679,-4.8583465692  
 C,0,4.6459095506,4.0935191662,-4.5810051569  
 O,0,2.2840747728,0.3857386765,-4.719454277  
 C,0,4.3524016962,2.1248609761,-6.0164767917  
 C,0,2.1171535783,3.7308245898,-5.6860392088

C,0,1.5235395408,4.2488648424,-4.5080504564  
 C,0,1.0206275209,3.380247323,-3.5655340074  
 H,0,2.0201405897,-1.1435684968,-1.3351005414  
 H,0,0.926868126,-0.65404666,-2.6937525229  
 H,0,2.4055172225,-1.6098942261,-3.0428029366  
 H,0,3.7819111106,2.6440711292,-2.7473285633  
 H,0,5.3872700556,1.8001740933,-5.7998035648  
 H,0,3.7015084627,1.2540448151,-6.1753800253  
 H,0,4.3416928937,2.7850458204,-6.8996566006  
 H,0,5.6285179205,3.7898993472,-4.1745265781  
 H,0,4.7804133195,4.6554155539,-5.5186165897  
 H,0,4.1086768849,4.7154353583,-3.8468823187  
 H,0,2.5430688353,4.3982962648,-6.4448719029  
 H,0,1.7828603409,2.7482993869,-6.0425752275  
 H,0,1.7039321495,5.2992945108,-4.2406721573  
 H,0,0.7659427832,2.3532684604,-3.8464828173  
 H,0,0.716952515,3.7182909213,-2.5676270706

### Cation/ B3LYPGD3/6-31G\*/PCM- Conf2

/home/bibaswanbiswas/c8/Parentcalcs/SM2B3LYPPCMSB  
 GD3

parent sm conf 2

B3LYP/6-31G\*

E(RB3LYP) = -519.528552243

Zero-point correction= 0.242322

(Hartree/Particle)

Thermal correction to Energy= 0.255129

Thermal correction to Enthalpy= 0.256073

Thermal correction to Gibbs Free Energy= 0.202846

Sum of electronic and zero-point Energies= -

519.286230

Sum of electronic and thermal Energies= -

519.273424

Sum of electronic and thermal Enthalpies= -

519.272479

Sum of electronic and thermal Free Energies= -

519.325707

|        | E (Thermal) | CV             | S        |
|--------|-------------|----------------|----------|
|        | KCal/Mol    | Cal/Mol-Kelvin | Cal/Mol- |
| Kelvin |             |                |          |
| Total  | 160.096     | 46.797         | 112.026  |

C,0,2.0071022247,-0.776382545,-2.2475641334  
 O,0,2.7802617735,0.4411707824,-2.4058465496  
 C,0,2.7742781201,0.9846673246,-3.6182711913  
 O,0,2.1806066683,0.5486663872,-4.5834078193  
 C,0,3.6346685899,2.2432126723,-3.580670352  
 N,0,3.7327104093,2.9960608849,-4.8850859586  
 C,0,4.4452722385,2.1643409319,-5.9261205285  
 C,0,4.542001335,4.2433046725,-4.6189665001  
 C,0,2.3449951647,3.4041037702,-5.4437368399  
 C,0,1.4528567462,4.0418596774,-4.4235802743  
 C,0,1.1866528596,5.3495416847,-4.4041314277  
 H,0,2.1371008719,-1.0628610283,-1.2056387024  
 H,0,0.9562389812,-0.5801931479,-2.4700287023  
 H,0,2.3912060882,-1.5498577025,-2.9157644363  
 H,0,4.6483949695,1.9699710437,-3.2792859015  
 H,0,3.2375178935,2.9240817428,-2.8258318497  
 H,0,3.8797028422,1.249798288,-6.088345609

H,0,4.5027212983,2.7452367188,-6.8467608867  
 H,0,5.4482776864,1.939233658,-5.5624424167  
 H,0,5.5056327465,3.9536496221,-4.200082511  
 H,0,4.6862994476,4.7680091573,-5.563066279  
 H,0,3.9946986569,4.8734377724,-3.9190156756  
 H,0,2.5639035617,4.0811513476,-6.271052845  
 H,0,1.9093421741,2.4852578897,-5.8322729478  
 H,0,0.9740357179,3.3778611461,-3.7070491127  
 H,0,1.6294457915,6.0358152895,-5.1222779496  
 H,0,0.5031071424,5.7761799596,-3.6760256004

### TS/ B3LYPGD3 /6-31G\*/PCM

/home/bibaswanbiswas/c8/Parentcalcs/TSB3LYPPCMSBG  
 D3

parent ts exo s-cis

B3LYP/6-31G\*

E(RB3LYP) = -519.011856695

Zero-point correction= 0.224523 (Hartree/Particle)

Thermal correction to Energy= 0.237051

Thermal correction to Enthalpy= 0.237995

Thermal correction to Gibbs Free Energy= 0.186593

Sum of electronic and ZPE= -518.787334

Sum of electronic and thermal Energies= -518.774806

Sum of electronic and thermal Enthalpies= -518.773862

Sum of electronic and thermal Free Energies= -518.825264

|  | E        | CV        | S         |
|--|----------|-----------|-----------|
|  | KCal/Mol | Cal/Mol-K | Cal/Mol-K |

Total 148.752 46.541 108.185

C,0,1.9866846467,-0.8015225046,-2.3669378769

O,0,2.7412570102,0.4094627254,-2.4690339087

C,0,2.8184042089,0.9479447164,-3.733921268

C,0,3.5093184178,2.1909031702,-3.7129085486

N,0,3.8327248315,2.8918089264,-4.8632179052

C,0,4.6762030536,4.0716894223,-4.5806906754

O,0,2.3063549903,0.3764456728,-4.7071852919

C,0,4.340996961,2.1233313228,-6.0232718209

C,0,2.1097103892,3.7729455719,-5.6829787854

C,0,1.5023653673,4.2286754139,-4.4950232621

C,0,0.9896523656,3.3364742385,-3.5949018789

H,0,2.0283818312,-1.0883825688,-1.3146522924

H,0,0.9459704744,-0.6473413973,-2.6713209823

H,0,2.4186206923,-1.592630499,-2.9883025513

H,0,3.7795834301,2.6337124602,-2.7663263314

H,0,5.3567282935,1.7706865553,-5.8101993241

H,0,3.6843765219,1.2750298114,-6.1994126786

H,0,4.3564293874,2.7771783264,-6.8980707305

H,0,5.6466770861,3.751462259,-4.1848400888

H,0,4.8244975744,4.6381499319,-5.5011846436

H,0,4.1708338851,4.701099242,-3.8461222957

H,0,2.5241815033,4.4775310782,-6.3990899215

H,0,1.7860123278,2.8225622243,-6.0974880062

H,0,1.669824969,5.2605525083,-4.187904618

H,0,0.7359750628,2.3262885636,-3.8971618144

H,0,0.6724887185,3.6434038287,-2.6018924991

**Cation/ M06GD3/6-31G\*/PCM- Conf2**

/home/bibaswanbiswas/c8/Parentcalcs/SM2M06PCMSBG  
D3

parent sm conf 2

M06/6-31G\*

E(RM06) = -519.153693058

Zero-point correction= 0.240263

(Hartree/Particle)

Thermal correction to Energy= 0.253066

Thermal correction to Enthalpy= 0.254010

Thermal correction to Gibbs Free Energy= 0.200939

Sum of electronic and zero-point Energies= -

518.913430

Sum of electronic and thermal Energies= -

518.900627

Sum of electronic and thermal Enthalpies= -

518.899683

Sum of electronic and thermal Free Energies= -

518.952754

|        | E (Thermal) | CV             | S        |
|--------|-------------|----------------|----------|
| Kelvin | KCal/Mol    | Cal/Mol-Kelvin | Cal/Mol- |
| Total  | 158.801     | 47.046         | 111.697  |

C,0,2.0455191788,-0.7824688665,-2.2736836244

O,0,2.8073855096,0.42681895,-2.4187059667

C,0,2.7747204393,0.9886404351,-3.6148319811

O,0,2.168559344,0.5672155385,-4.5724415938

C,0,3.6171754479,2.2453239062,-3.5718128528

N,0,3.7127282613,2.9906642058,-4.8665914065

C,0,4.4189825183,2.1622443883,-5.8980702741

C,0,4.5230869859,4.2240403233,-4.6070984084

C,0,2.3402975794,3.400326728,-5.4256402855

C,0,1.4626331018,4.0632222767,-4.4227185167

C,0,1.2074696891,5.36933152,-4.4458473339

H,0,2.2094918964,-1.1120002763,-1.2481534726

H,0,0.9855772451,-0.5784108837,-2.4489664623

H,0,2.3994048548,-1.5360000816,-2.9826074863

H,0,4.6371898701,1.9849602238,-3.2653138959

H,0,3.21611523,2.9257730238,-2.8120154249

H,0,3.8479374067,1.2478689885,-6.0671930803

H,0,4.4846065527,2.7465184995,-6.8194146989

H,0,5.4220543397,1.9306463218,-5.5303997

H,0,5.4939969952,3.9288503504,-4.2016562129

H,0,4.6567777862,4.7541615228,-5.5532691794

H,0,3.9905912044,4.8567794985,-3.8931543976

H,0,2.569063657,4.0649322424,-6.2662148639

H,0,1.8950465333,2.4783911678,-5.8077106484

H,0,0.9758274121,3.4224964663,-3.6852909445

H,0,1.6576477382,6.0259985625,-5.1910343292

H,0,0.5291452224,5.8309929679,-3.7324859592

**TS/ M06GD3 /6-31G\*/PCM**

/home/bibaswanbiswas/c8/Parentcalcs/TSM06PCMSBGD3

parent ts exo s-cis

M06/6-31G\*

E(RM06) = -518.636532007

Zero-point correction= 0.222776 (Hartree/Particle)

Thermal correction to Energy= 0.235400

Thermal correction to Enthalpy= 0.236344

Thermal correction to Gibbs Free Energy= 0.184630

Sum of electronic and ZPE= -518.413756

Sum of electronic and thermal Energies= -518.401132

Sum of electronic and thermal Enthalpies= -518.400188

Sum of electronic and thermal Free Energies= -518.451902

| E        | CV        | S              |
|----------|-----------|----------------|
| KCal/Mol | Cal/Mol-K | Cal/Mol-K      |
| Total    | 147.716   | 46.776 108.841 |

C,0,1.9687402095,-0.735901955,-2.3381080529

O,0,2.714598796,0.4622698015,-2.4611407738

C,0,2.8329816531,0.9417399961,-3.7348623201

C,0,3.4646191692,2.2169739513,-3.7266952061

N,0,3.8125749001,2.900102372,-4.8747522137

C,0,4.6731788603,4.0531098462,-4.5916999336

O,0,2.3915643397,0.3141327407,-4.6971365788

C,0,4.3085005006,2.1326811389,-6.0257958101

C,0,2.1128160148,3.8288892221,-5.6801159045

C,0,1.5094433467,4.1984372726,-4.4735282658

C,0,1.0581723224,3.2211798605,-3.6295642329

H,0,1.9791593152,-0.993009333,-1.2762334932

H,0,0.9341564602,-0.5933982801,-2.6754117842

H,0,2.4152043352,-1.5492123669,-2.9217322006

H,0,3.7328953931,2.6672546987,-2.7774234389

H,0,5.3247568828,1.7694451398,-5.8184397591

H,0,3.6449777128,1.2859662781,-6.2034643039

H,0,4.3294912044,2.7896224806,-6.9022218347

H,0,5.6417745378,3.7117941402,-4.2011399737

H,0,4.8310802808,4.6247860416,-5.5114934659

H,0,4.1865982861,4.6916022487,-3.8474214218

H,0,2.5364684089,4.5746832519,-6.3533675377

H,0,1.7994976012,2.8993972573,-6.1576335792

H,0,1.6727258168,5.207986358,-4.0899348123

H,0,0.7822745821,2.2425844388,-4.0191668983

H,0,0.7560030703,3.4343443996,-2.6055562038

**Cation/ PBE0GD3/6-31G\*/PCM- Conf2**

/home/bibaswanbiswas/c8/Parentcalcs/SM2PBE0PCMSBG  
D3

parent sm conf 2

PBE1PBE/6-31G\*

E(RPBE1PBE) = -518.911312025

Zero-point correction= 0.243794

(Hartree/Particle)

Thermal correction to Energy= 0.256526

Thermal correction to Enthalpy= 0.257470

Thermal correction to Gibbs Free Energy= 0.204542

Sum of electronic and zero-point Energies= -

518.667518

Sum of electronic and thermal Energies= -

518.654786

Sum of electronic and thermal Enthalpies= -

518.653842

Sum of electronic and thermal Free Energies= -

518.706770

|        | E (Thermal) | CV             | S        |
|--------|-------------|----------------|----------|
| Kelvin | KCal/Mol    | Cal/Mol-Kelvin | Cal/Mol- |
| Total  | 160.973     | 46.479         | 111.396  |

C,0,2.0149126296,-0.7571899549,-2.2693600272  
O,0,2.7748845503,0.4544501958,-2.4141465477  
C,0,2.7851715512,0.9853049554,-3.6241313143  
O,0,2.2127928843,0.537146961,-4.5917018791  
C,0,3.6329359825,2.2431200121,-3.5851480135  
N,0,3.723870322,2.9906532391,-4.8772207773  
C,0,4.4289794016,2.1708848288,-5.9129734682  
C,0,4.5232590544,4.2281786666,-4.6138584148  
C,0,2.3494474189,3.3892224325,-5.4213729963  
C,0,1.4740771538,4.04545354,-4.4059825894  
C,0,1.2013316902,5.3496665706,-4.4203695351  
H,0,2.1274446644,-1.0450305099,-1.2259206501  
H,0,0.9659317829,-0.5709054368,-2.5083407315  
H,0,2.4136620937,-1.5301240991,-2.9294026408  
H,0,4.6490407198,1.975107461,-3.2835754566  
H,0,3.2340155873,2.9207670669,-2.8265381284  
H,0,3.8621814612,1.2575101128,-6.082375925  
H,0,4.4892912386,2.756151265,-6.8312101203  
H,0,5.4320759099,1.940923676,-5.551514414  
H,0,5.492259521,3.9413269242,-4.2044739181  
H,0,4.65872052,4.7594030474,-5.556175536  
H,0,3.9805983573,4.854550903,-3.9057952823  
H,0,2.5578615842,4.0543372328,-6.2622183824  
H,0,1.9028656939,2.4668609995,-5.7936039045  
H,0,1.0046842248,3.4008056386,-3.6650371633  
H,0,1.6307845071,6.0159734013,-5.1653251848  
H,0,0.5259514949,5.7927688702,-3.694549999

### TS/ PBE0GD3 /6-31G\*/PCM

/home/bibaswanbiswas/c8/Parentcalcs/TSPBE0PCMSBGD  
3  
parent ts exo s-cis  
PBE1PBE/6-31G\*  
E(RPBE1PBE) = -518.392479456

Zero-point correction= 0.226405 (Hartree/Particle)  
Thermal correction to Energy= 0.238737  
Thermal correction to Enthalpy= 0.239681  
Thermal correction to Gibbs Free Energy= 0.188764  
Sum of electronic and ZPE= -518.166074  
Sum of electronic and thermal Energies= -518.153743  
Sum of electronic and thermal Enthalpies= -518.152798  
Sum of electronic and thermal Free Energies= -518.203716

| E        | CV        | S         |
|----------|-----------|-----------|
| KCal/Mol | Cal/Mol-K | Cal/Mol-K |
| Total    | 149.810   | 45.920    |

C,0,2.0145562325,-0.7913118165,-2.3718084097  
O,0,2.7201242151,0.4366837062,-2.4733323536  
C,0,2.7859948012,0.9602679804,-3.7320044668  
C,0,3.4143454864,2.2353887925,-3.7168002437  
N,0,3.7767889675,2.9076773035,-4.8716482687  
C,0,4.6412266428,4.0569340951,-4.5794916535  
O,0,2.3019165306,0.3648549915,-4.6981191734

C,0,4.2965082005,2.1170355324,-5.9972030348  
C,0,2.145150778,3.7958460254,-5.6853552582  
C,0,1.5291806279,4.2427954714,-4.5044461232  
C,0,1.0782328154,3.3030529032,-3.616947438  
H,0,2.0523749073,-1.069998597,-1.3175457629  
H,0,0.9731137467,-0.6785222755,-2.6899556748  
H,0,2.4828549078,-1.5707792471,-2.9807683046  
H,0,3.725397308,2.6615117889,-2.7739769182  
H,0,5.3046103198,1.7582984097,-5.7612081474  
H,0,3.6343503049,1.2708923894,-6.1695072577  
H,0,4.3347640207,2.7540485966,-6.8843872894  
H,0,5.5904103039,3.712579564,-4.1541860229  
H,0,4.8317781845,4.6104475493,-5.5008131647  
H,0,4.1355137299,4.7082263123,-3.8637194482  
H,0,2.5703765824,4.5032628788,-6.3946348841  
H,0,1.798939724,2.8610411401,-6.1220599752  
H,0,1.7099087689,5.2625772103,-4.1669415955  
H,0,0.7760514863,2.319991988,-3.9653567153  
H,0,0.7897844072,3.5646583073,-2.6018224152

### Cation/ B3LYP /6-31G\*/PCM-Conf2

/home/bibaswanbiswas/c8/Parentcalcs/SM2B3LYPPSPCM  
SB  
parent sm conf 2  
B3LYP/6-31G\*  
E(RB3LYP) = -519.501174619

Zero-point correction= 0.241778 (Hartree/Particle)  
Thermal correction to Energy= 0.254736  
Thermal correction to Enthalpy= 0.255680  
Thermal correction to Gibbs Free Energy= 0.202408  
Sum of electronic and ZPE= -519.259397  
Sum of electronic and thermal Energies= -519.246439  
Sum of electronic and thermal Enthalpies= -519.245495  
Sum of electronic and thermal Free Energies= -519.299126

| E        | CV        | S         |
|----------|-----------|-----------|
| KCal/Mol | Cal/Mol-K | Cal/Mol-K |
| Total    | 159.849   | 47.134    |

C,0,2.057310332,-0.8525210663,-2.2644215254  
O,0,2.8004239017,0.3836051209,-2.4133833706  
C,0,2.7811731767,0.9430577525,-3.618858864  
O,0,2.196147222,0.5059513815,-4.5887552883  
C,0,3.6175854908,2.2194814405,-3.5641303376  
N,0,3.7125583763,2.9930236554,-4.8571188975  
C,0,4.4128834307,2.1733844154,-5.9158875469  
C,0,4.5368527192,4.227047812,-4.5795129339  
C,0,2.3249993452,3.4161127604,-5.3999901168  
C,0,1.4775098647,4.1532393317,-4.4079726935  
C,0,1.1854150316,5.4507017515,-4.523475005  
H,0,2.1946047229,-1.1423502822,-1.2244671487  
H,0,1.0021190179,-0.6807220039,-2.4841088156  
H,0,2.461033324,-1.6120347478,-2.9362773631  
H,0,4.6352669684,1.9608902164,-3.2626365805  
H,0,3.2078664526,2.8848422748,-2.8020791317  
H,0,3.8269071757,1.2778770232,-6.1076533313  
H,0,4.4940904395,2.7791455699,-6.8183711727  
H,0,5.4068489108,1.9140964916,-5.5500692251  
H,0,5.5063919083,3.9194221315,-4.1880586108

H,0,4.6657064237,4.7713277048,-5.514880347  
 H,0,4.0113098307,4.8465578523,-3.8544571307  
 H,0,2.5412489232,4.0317356399,-6.2744482588  
 H,0,1.8510950239,2.4882231086,-5.7190619141  
 H,0,1.0351231637,3.5703576534,-3.6027360935  
 H,0,1.5847069846,6.0610956377,-5.3302437229  
 H,0,0.5218538388,5.9437693743,-3.8192675742

### TS/ B3LYP/6-31G\*/PCM

/home/bibaswanbiswas/c8/Parentcalcs/TSB3LYPPSPCMS  
 B

parent ts exo s-cis  
 B3LYP/6-31G\*  
 E(RB3LYP) = -518.984732518

Zero-point correction= 0.224070 (Hartree/Particle)  
 Thermal correction to Energy= 0.236778  
 Thermal correction to Enthalpy= 0.237722  
 Thermal correction to Gibbs Free Energy= 0.185859  
 Sum of electronic and ZPE= -518.760663  
 Sum of electronic and thermal Energies= -518.747955  
 Sum of electronic and thermal Enthalpies= -518.747011  
 Sum of electronic and thermal Free Energies= -518.798874

| E                                            | CV        | S              |
|----------------------------------------------|-----------|----------------|
| KCal/Mol                                     | Cal/Mol-K | Cal/Mol-K      |
| Total                                        | 148.580   | 46.847 109.155 |
| C,0,2.036326266,-0.8273470306,-2.3371917288  |           |                |
| O,0,2.7383275449,0.4126488013,-2.4535910539  |           |                |
| C,0,2.8112976155,0.9339679026,-3.7268721839  |           |                |
| C,0,3.4742243681,2.1939486613,-3.7153756902  |           |                |
| N,0,3.8161979518,2.8917848668,-4.8627768863  |           |                |
| C,0,4.6993609501,4.0414038579,-4.5735449359  |           |                |
| O,0,2.3271350897,0.3295760773,-4.693978429   |           |                |
| C,0,4.3050334079,2.1132864994,-6.02497574    |           |                |
| C,0,2.1287052447,3.8367035771,-5.6875491085  |           |                |
| C,0,1.4944377057,4.2670291683,-4.5032165916  |           |                |
| C,0,0.9404699723,3.3611140797,-3.6436048471  |           |                |
| H,0,2.0819040609,-1.0938451002,-1.2798134553 |           |                |
| H,0,0.9924168064,-0.724546189,-2.6505133129  |           |                |
| H,0,2.5080435058,-1.6094425911,-2.9400318655 |           |                |
| H,0,3.7370555229,2.6429043213,-2.769327603   |           |                |
| H,0,5.3129187747,1.7369086231,-5.8141777511  |           |                |
| H,0,3.6299157112,1.2787320813,-6.1978464715  |           |                |
| H,0,4.3362921509,2.7678431748,-6.8986918264  |           |                |
| H,0,5.6612609436,3.6853948294,-4.1873131794  |           |                |
| H,0,4.8615948605,4.6115290266,-5.4893981531  |           |                |
| H,0,4.2220427584,4.6794049961,-3.8279856004  |           |                |
| H,0,2.5661072001,4.5590549983,-6.3718244395  |           |                |
| H,0,1.7924817197,2.9113322098,-6.1460772055  |           |                |
| H,0,1.6589167755,5.2901196078,-4.1661107056  |           |                |
| H,0,0.6938230932,2.3582881637,-3.9754079135  |           |                |
| H,0,0.5879639995,3.6496663871,-2.6568433221  |           |                |

### Cation/M11/6-31G\*/PCM-Conf2

/home/bibaswanbiswas/c8/newMinnFunc/SM2M11  
 parent sm conf 2  
 M11/6-31G\*  
 E(RM11) = -519.215307678

Zero-point correction= 0.241865 (Hartree/Particle)  
 Thermal correction to Energy= 0.254549  
 Thermal correction to Enthalpy= 0.255493  
 Thermal correction to Gibbs Free Energy= 0.202879  
 Sum of electronic and ZPE= -518.973442  
 Sum of electronic and thermal Energies= -518.960759  
 Sum of electronic and thermal Enthalpies= -518.959814  
 Sum of electronic and thermal Free Energies= -519.012428

| E                                            | CV        | S              |
|----------------------------------------------|-----------|----------------|
| KCal/Mol                                     | Cal/Mol-K | Cal/Mol-K      |
| Total                                        | 159.732   | 46.564 110.735 |
| C,0,2.013806569,-0.7434856016,-2.2705517241  |           |                |
| O,0,2.7993331706,0.4596143627,-2.4088108433  |           |                |
| C,0,2.7645167358,1.032736886,-3.5991101612   |           |                |
| O,0,2.1346744659,0.6217342909,-4.548558019   |           |                |
| C,0,3.6261132855,2.2867533376,-3.5757093088  |           |                |
| N,0,3.7248902429,2.994888796,-4.8903262262   |           |                |
| C,0,4.4412938844,2.1437312634,-5.8964992964  |           |                |
| C,0,4.5228935216,4.2430065377,-4.651455869   |           |                |
| C,0,2.3597294168,3.3845848485,-5.4649368007  |           |                |
| C,0,1.4471026475,3.9820840322,-4.4333738678  |           |                |
| C,0,1.2233994629,5.2913174387,-4.3491196041  |           |                |
| H,0,2.1525431586,-1.0683316058,-1.237246996  |           |                |
| H,0,0.9605051198,-0.5203671706,-2.4742769724 |           |                |
| H,0,2.3777177804,-1.5017713835,-2.972910936  |           |                |
| H,0,4.6419490586,2.0166956705,-3.2605357112  |           |                |
| H,0,3.2172728579,2.9872328449,-2.8360616535  |           |                |
| H,0,3.8754340011,1.2192683976,-6.0383814519  |           |                |
| H,0,4.499446002,2.7033408263,-6.8362188558   |           |                |
| H,0,5.4485944109,1.9323823316,-5.5215326827  |           |                |
| H,0,5.4890086446,3.9657715371,-4.2168489018  |           |                |
| H,0,4.6725463785,4.7476631077,-5.6115371164  |           |                |
| H,0,3.9646820028,4.8880366093,-3.9648344073  |           |                |
| H,0,2.5800950538,4.0987240646,-6.2678561992  |           |                |
| H,0,1.9385594964,2.4708745975,-5.8929686747  |           |                |
| H,0,0.9258220151,3.2891474507,-3.7673407634  |           |                |
| H,0,1.7123163756,5.9983318894,-5.0246124749  |           |                |
| H,0,0.5347862408,5.7033526405,-3.6107074824  |           |                |

### TS M11 /6-31G\*/PCM

/home/bibaswanbiswas/c8/newMinnFunc/TSparentRM11  
 parent ts exo s-cis  
 M11/6-31G\*  
 E(RM11) = -518.690990016

Zero-point correction= 0.225201 (Hartree/Particle)  
 Thermal correction to Energy= 0.237309  
 Thermal correction to Enthalpy= 0.238253  
 Thermal correction to Gibbs Free Energy= 0.187899  
 Sum of electronic and ZPE= -518.465789  
 Sum of electronic and thermal Energies= -518.453681  
 Sum of electronic and thermal Enthalpies= -518.452737  
 Sum of electronic and thermal Free Energies= -518.503091

| E                                            | CV        | S              |
|----------------------------------------------|-----------|----------------|
| KCal/Mol                                     | Cal/Mol-K | Cal/Mol-K      |
| Total                                        | 148.914   | 45.420 105.979 |
| C,0,1.9990917477,-0.8112708507,-2.4148524687 |           |                |



O,0,2.7001513553,0.4302106947,-2.4859167187  
 C,0,2.7495685992,0.993033897,-3.7243880246  
 C,0,3.3430589892,2.2914997784,-3.6957182915  
 N,0,3.7370903755,2.925646042,-4.8752369696  
 C,0,4.5914363378,4.0892728446,-4.5839555614  
 O,0,2.2389276698,0.4314893392,-4.6965288329  
 C,0,4.304068565,2.110158674,-5.9670670415  
 C,0,2.1506683135,3.7345696062,-5.6833049862  
 C,0,1.5461271804,4.2530791161,-4.5250848203  
 C,0,1.2116856179,3.304505757,-3.5820433471  
 H,0,2.0324822657,-1.119247934,-1.365125744  
 H,0,0.9581539807,-0.6883524325,-2.7420112782  
 H,0,2.4821726422,-1.5668193404,-3.0480770708  
 H,0,3.7613038927,2.65800439,-2.7636197539  
 H,0,5.3143666309,1.7742682083,-5.6932017149  
 H,0,3.655136416,1.249791411,-6.1426587714  
 H,0,4.3590426437,2.7334071112,-6.8693983809  
 H,0,5.5369242546,3.7537462161,-4.1344128266  
 H,0,4.7948015714,4.6315184871,-5.5151569955  
 H,0,4.0611508985,4.7441266682,-3.8823751498  
 H,0,2.5620728306,4.3967247893,-6.4517186358  
 H,0,1.7830493066,2.7732873481,-6.0603788629  
 H,0,1.743098458,5.2857706078,-4.2278544805  
 H,0,0.8218071774,2.3397580505,-3.9132593075  
 H,0,0.9768162801,3.5792825208,-2.5506939644

### Cation/M11L/6-31G\*/PCM-Conf2

/home/bibaswanbiswas/c8/newMinnFunc/SM2M11L  
 parent sm conf 2  
 M11L/6-31G\*  
 E(RM11L) = -519.327287478  
 Zero-point correction= 0.236445 (Hartree/Particle)  
 Thermal correction to Energy= 0.249534  
 Thermal correction to Enthalpy= 0.250478  
 Thermal correction to Gibbs Free Energy= 0.196184  
 Sum of electronic and ZPE= -519.090842  
 Sum of electronic and thermal Energies= -519.077754  
 Sum of electronic and thermal Enthalpies= -519.076809  
 Sum of electronic and thermal Free Energies= -519.131103

| E        | CV        | S              |
|----------|-----------|----------------|
| KCal/Mol | Cal/Mol-K | Cal/Mol-K      |
| Total    | 156.585   | 47.456 114.271 |

C,0,2.0340726827,-0.7141607078,-2.2956807733  
 O,0,2.7975032983,0.4751438145,-2.4216748932  
 C,0,2.7789965695,1.0081121502,-3.613020059  
 O,0,2.1871339235,0.5800854356,-4.5592651837  
 C,0,3.6262127796,2.2555072033,-3.5833596618  
 N,0,3.7158436265,2.979869074,-4.8698050726  
 C,0,4.4092253537,2.1645056277,-5.8883078243  
 C,0,4.5124352099,4.1991356037,-4.6181554417  
 C,0,2.363157209,3.3829515876,-5.4171054596  
 C,0,1.4793288015,4.0166038477,-4.4101481697  
 C,0,1.2056823388,5.3141635285,-4.4100191268  
 H,0,2.1714024365,-1.0385321175,-1.2592295894  
 H,0,0.9735114883,-0.5084838496,-2.4988183743  
 H,0,2.4027966811,-1.4801262934,-2.9922017889  
 H,0,4.6504699593,1.9938725382,-3.2736468666  
 H,0,3.2342121104,2.9502944273,-2.8234833588  
 H,0,3.8348356963,1.2502436169,-6.0751540558

H,0,4.4834926659,2.7536043489,-6.8117514936  
 H,0,5.416091875,1.9194670255,-5.5256989758  
 H,0,5.4897379563,3.9118707302,-4.2093409584  
 H,0,4.6490877471,4.733725536,-5.5669352691  
 H,0,3.978894462,4.8381307623,-3.9022942272  
 H,0,2.5875306608,4.0710919679,-6.2481830219  
 H,0,1.920389963,2.4656868419,-5.8310136926  
 H,0,0.9848582509,3.3561711575,-3.6851868708  
 H,0,1.6520761694,5.996229451,-5.1439171394  
 H,0,0.510052084,5.7521546916,-3.688925652

### TS/ M11L /6-31G\*/PCM

/home/bibaswanbiswas/c8/newMinnFunc/TSparentM11L  
 parent ts exo s-cis  
 M11L/6-31G\*  
 E(RM11L) = -518.821863825

Zero-point correction= 0.219343 (Hartree/Particle)  
 Thermal correction to Energy= 0.232208  
 Thermal correction to Enthalpy= 0.233152  
 Thermal correction to Gibbs Free Energy= 0.180989  
 Sum of electronic and ZPE= -518.602521  
 Sum of electronic and thermal Energies= -518.589656  
 Sum of electronic and thermal Enthalpies= -518.588712  
 Sum of electronic and thermal Free Energies= -518.640875

| E        | CV        | S              |
|----------|-----------|----------------|
| KCal/Mol | Cal/Mol-K | Cal/Mol-K      |
| Total    | 145.713   | 47.624 109.786 |

C,0,2.0095406451,-0.72564397,-2.3735716423  
 O,0,2.731754584,0.4662964057,-2.4699275684  
 C,0,2.8367125147,0.9396694693,-3.727091124  
 C,0,3.5210538354,2.1825241292,-3.7206445947  
 N,0,3.8350356761,2.8686153217,-4.8491774867  
 C,0,4.6679071403,4.0188828505,-4.5812113521  
 O,0,2.37709327,0.33050037,-4.6735954095  
 C,0,4.2982578508,2.1249668546,-6.0027468325  
 C,0,2.116740734,3.8101927789,-5.6776950658  
 C,0,1.5206337475,4.2028141153,-4.4784315519  
 C,0,0.9955289859,3.282645183,-3.62800938  
 H,0,2.0163858236,-0.9981143903,-1.3097786909  
 H,0,0.9691545833,-0.5968832365,-2.7177991351  
 H,0,2.4719401923,-1.5316791614,-2.9668747524  
 H,0,3.7171352259,2.6753565977,-2.7697082489  
 H,0,5.3166917913,1.7377680333,-5.8161416154  
 H,0,3.6215786873,1.2865124428,-6.1999039035  
 H,0,4.3233798739,2.8003556143,-6.8711198931  
 H,0,5.6547037726,3.6999271946,-4.1995566528  
 H,0,4.8067942001,4.5980744093,-5.5049976716  
 H,0,4.1803589147,4.654721741,-3.8272146509  
 H,0,2.5369292548,4.5499492148,-6.3692604597  
 H,0,1.7933034264,2.8679295877,-6.1387058921  
 H,0,1.6995887121,5.2250808643,-4.1139468787  
 H,0,0.7343641301,2.2812458317,-3.9880619001  
 H,0,0.6616864279,3.5457527485,-2.6188676466

### Cation/MN12L/6-31G\*/PCM-Conf2

/home/bibaswanbiswas/c8/newMinnFunc/SM2MN12L

parent sm conf 2  
MN12L/6-31G\*  
E(RMN12L) = -518.951419795

Zero-point correction= 0.243871 (Hartree/Particle)  
Thermal correction to Energy= 0.256423  
Thermal correction to Enthalpy= 0.257367  
Thermal correction to Gibbs Free Energy= 0.205228  
Sum of electronic and ZPE= -518.707549  
Sum of electronic and thermal Energies= -518.694997  
Sum of electronic and thermal Enthalpies= -518.694053  
Sum of electronic and thermal Free Energies= -518.746192

E CV S  
KCal/Mol Cal/Mol-K Cal/Mol-K  
Total 160.908 46.170 109.736

C,0,2.0169828434,-0.7049087757,-2.2646252304  
O,0,2.8214020853,0.4688281021,-2.421525019  
C,0,2.7473463566,1.0593237716,-3.5941676346  
O,0,2.0742201311,0.6835027372,-4.5237617892  
C,0,3.6215110641,2.292299404,-3.5805403752  
N,0,3.7304764188,2.9893785149,-4.8974695711  
C,0,4.4439388277,2.1340062105,-5.8924629489  
C,0,4.5354299227,4.226101261,-4.6561476084  
C,0,2.375961661,3.4023031116,-5.4890249093  
C,0,1.4405066955,3.9377820435,-4.4578548506  
C,0,1.1979407051,5.23852889,-4.3143488262  
H,0,2.2028163389,-1.0523615892,-1.2497499573  
H,0,0.9619720487,-0.4545475411,-2.4031232884  
H,0,2.315630011,-1.461045135,-2.9952848126  
H,0,4.6348888965,2.023795922,-3.2613690998  
H,0,3.2274952561,3.0085075336,-2.848846377  
H,0,3.8792340087,1.2114559982,-6.0344115308  
H,0,4.5054567972,2.6860273103,-6.8337363302  
H,0,5.4484894764,1.9222221105,-5.5175272614  
H,0,5.4863332028,3.9455736066,-4.1967145379  
H,0,4.7129607197,4.7183498625,-5.6149824195  
H,0,3.9712686967,4.8848383834,-3.9899332592  
H,0,2.621360098,4.1562353184,-6.2457295124  
H,0,1.9767818243,2.5120784534,-5.9800775181  
H,0,0.9201506744,3.2043932581,-3.8386948965  
H,0,1.6868017534,5.9832118681,-4.9439749433  
H,0,0.4916754857,5.6114373694,-3.5762384927

### TS MN12L /6-31G\*/PCM

/home/bibaswanbiswas/c8/newMinnFunc/TSparentMN12L  
parent ts exo s-cis  
MN12L/6-31G\*  
E(RMN12L) = -518.439201710

Zero-point correction= 0.224956 (Hartree/Particle)  
Thermal correction to Energy= 0.237571  
Thermal correction to Enthalpy= 0.238515  
Thermal correction to Gibbs Free Energy= 0.187105  
Sum of electronic and ZPE= -518.214246  
Sum of electronic and thermal Energies= -518.201631  
Sum of electronic and thermal Enthalpies= -518.200687  
Sum of electronic and thermal Free Energies= -518.252097

E CV S  
KCal/Mol Cal/Mol-K Cal/Mol-K  
Total 149.078 46.711 108.202

C,0,1.9325265401,-0.7508724864,-2.4177255391  
O,0,2.7170502308,0.4228731216,-2.4924549408  
C,0,2.8277003282,0.9613161688,-3.7321307835  
C,0,3.5506798141,2.1827082858,-3.6992814757  
N,0,3.8753187468,2.8671519167,-4.8406527571  
C,0,4.6383874729,4.0820319173,-4.5779163876  
O,0,2.3142950986,0.4212165155,-4.7118213978  
C,0,4.3704887247,2.1363986189,-6.0074113063  
C,0,2.0513133216,3.7074753426,-5.694436471  
C,0,1.5301949616,4.1859552394,-4.4927277437  
C,0,1.0772902443,3.3116195317,-3.5408447492  
H,0,1.9336110014,-1.046796882,-1.3671227755  
H,0,0.9059275494,-0.561921754,-2.7528625601  
H,0,2.357600805,-1.5512155504,-3.0338360351  
H,0,3.8113550426,2.634157997,-2.749150699  
H,0,5.4026389585,1.8015658996,-5.8283307079  
H,0,3.7303831307,1.2747687489,-6.198188285  
H,0,4.3565031475,2.8115284725,-6.8700028638  
H,0,5.6393024901,3.8330449033,-4.1965601213  
H,0,4.7343930399,4.6573539976,-5.5034037427  
H,0,4.1058646098,4.6799040948,-3.8309618009  
H,0,2.4541346334,4.3739779979,-6.4564170948  
H,0,1.7835271296,2.7014370055,-6.022651614  
H,0,1.705070261,5.2299114483,-4.2228516363  
H,0,0.7947015077,2.297662185,-3.8189691612  
H,0,0.8139952099,3.6342082642,-2.5353273505

### Cation/MN12SX/6-31G\*/PCM-Conf2

/home/bibaswanbiswas/c8/newMinnFunc/SM2MN12SX  
parent sm conf 2  
MN12SX/6-31G\*  
E(RMN12SX) = -519.055212320

Zero-point correction= 0.243315 (Hartree/Particle)  
Thermal correction to Energy= 0.256065  
Thermal correction to Enthalpy= 0.257009  
Thermal correction to Gibbs Free Energy= 0.203999  
Sum of electronic and ZPE= -518.811897  
Sum of electronic and thermal Energies= -518.799148  
Sum of electronic and thermal Enthalpies= -518.798203  
Sum of electronic and thermal Free Energies= -518.851213

E CV S  
KCal/Mol Cal/Mol-K Cal/Mol-K  
Total 160.683 46.526 111.568

C,0,2.0281694498,-0.7407991288,-2.2597276378  
O,0,2.8045796994,0.4532522075,-2.4152862507  
C,0,2.7613065696,1.0185275437,-3.6058803058  
O,0,2.1298370753,0.6081280331,-4.55095102  
C,0,3.6201832717,2.2684272683,-3.582887212  
N,0,3.7223891657,2.9896468148,-4.8883232399  
C,0,4.4333645787,2.1518370637,-5.9040637475  
C,0,4.5304091009,4.2239768983,-4.6334600956  
C,0,2.3627073007,3.4013170035,-5.4604974291  
C,0,1.4487959128,3.9987531627,-4.4400784115

C,0,1.2034057908,5.3045625773,-4.3689791727  
 H,0,2.1781859981,-1.0535024724,-1.2247177199  
 H,0,0.9708519164,-0.5281763601,-2.4511840208  
 H,0,2.3831491218,-1.5113184309,-2.9526235966  
 H,0,4.6364182629,1.9997729765,-3.2674002712  
 H,0,3.21887838,2.9648759309,-2.8351381606  
 H,0,3.8613161089,1.2371373718,-6.0759034449  
 H,0,4.5092105174,-2.7284893397,-6.8311637816  
 H,0,5.4344609597,1.9181770637,-5.5285291764  
 H,0,5.4960734437,3.9340197119,-4.2083652411  
 H,0,4.6815417218,4.7444494503,-5.5836470014  
 H,0,3.9858448762,4.8655335844,-3.9338950254  
 H,0,2.5962554744,4.1161178581,-6.2590217599  
 H,0,1.9342173749,2.4973665256,-5.9040192549  
 H,0,0.9324569263,3.3065492853,-3.7702438898  
 H,0,1.6815144361,6.0164458883,-5.0452024419  
 H,0,0.5035085656,5.7137508328,-3.6411336914

### TS MN12SX /6-31G\*/PCM

/home/bibaswanbiswas/c8/newMinnFunc/TSparentMN12S

X

parent ts exo s-cis

MN12SX/6-31G\*

E(RMN12SX) = -518.540322510

Zero-point correction= 0.225346 (Hartree/Particle)  
 Thermal correction to Energy= 0.237939  
 Thermal correction to Enthalpy= 0.238883  
 Thermal correction to Gibbs Free Energy= 0.187252  
 Sum of electronic and ZPE= -518.314977  
 Sum of electronic and thermal Energies= -518.302383  
 Sum of electronic and thermal Enthalpies= -518.301439  
 Sum of electronic and thermal Free Energies= -518.353071

| E             | CV        | S         |
|---------------|-----------|-----------|
| KCal/Mol      | Cal/Mol-K | Cal/Mol-K |
| Total 149.309 | 46.521    | 108.668   |

C,0,1.9797597537,-0.7607466632,-2.3636653209  
 O,0,2.7068764343,0.4484683514,-2.4699473142  
 C,0,2.8065465414,0.9550897391,-3.729179851  
 C,0,3.4687007415,2.2132052718,-3.7179805179  
 N,0,3.8202691512,2.8885693683,-4.8642165818  
 C,0,4.6537565714,4.058653194,-4.5825581064  
 O,0,2.3273241175,0.3579310035,-4.6941428454  
 C,0,4.3195655022,2.1282363583,-6.0151205034  
 C,0,2.1035482905,3.7958027652,-5.6914997539  
 C,0,1.5254505726,4.2113985371,-4.4877797194  
 C,0,1.0700142336,3.2691759675,-3.6060422852  
 H,0,1.991149565,-1.026584899,-1.3023718482  
 H,0,0.9439217018,-0.6331807508,-2.7050365473  
 H,0,2.4464725746,-1.5599257412,-2.9537869379  
 H,0,3.7452542253,2.6579355953,-2.7687815146  
 H,0,5.33263677,1.7543215702,-5.8043811019  
 H,0,3.6526987193,1.2885348183,-6.2172830897  
 H,0,4.3559352452,2.7958185214,-6.8840505323  
 H,0,5.6271434187,3.7448778595,-4.1772982293  
 H,0,4.8103455344,4.6261897868,-5.5060135854  
 H,0,4.1444481376,4.6933123873,-3.8484839849  
 H,0,2.5261139463,4.5121895872,-6.3979942571

H,0,1.7917921472,2.8409199235,-6.1205722109  
 H,0,1.7025671126,5.2330418057,-4.1414345896  
 H,0,0.7751561533,2.2817328888,-3.9603882233  
 H,0,0.7868068391,3.5224937541,-2.5840305481

### Cation/N12/6-31G\*/PCM-Conf2

/home/bibaswanbiswas/c8/newMinnFunc/SM2N12

parent sm conf 2

N12/6-31G\*

E(RN12) = -519.370120061

Zero-point correction= 0.241625 (Hartree/Particle)  
 Thermal correction to Energy= 0.254409  
 Thermal correction to Enthalpy= 0.255353  
 Thermal correction to Gibbs Free Energy= 0.202643  
 Sum of electronic and ZPE= -519.128495  
 Sum of electronic and thermal Energies= -519.115711  
 Sum of electronic and thermal Enthalpies= -519.114767  
 Sum of electronic and thermal Free Energies= -519.167477

| E             | CV        | S         |
|---------------|-----------|-----------|
| KCal/Mol      | Cal/Mol-K | Cal/Mol-K |
| Total 159.644 | 47.072    | 110.937   |

C,0,2.0693624114,-0.826735041,-2.2909997007  
 O,0,2.8064644555,0.3910494327,-2.4372418608  
 C,0,2.7836144465,0.960275659,-3.6254962199  
 O,0,2.1978976052,0.5330626786,-4.5935661753  
 C,0,3.6091030077,2.2311816792,-3.5647845136  
 N,0,3.7095908004,2.9896712112,-4.8486298422  
 C,0,4.4036552881,2.1707538984,-5.8886983733  
 C,0,4.5183011185,4.2158805194,-4.5792579416  
 C,0,2.3327333353,3.4001914924,-5.3873340375  
 C,0,1.4956115765,4.1405063755,-4.4074346088  
 C,0,1.2032425912,5.4344107797,-4.5308925466  
 H,0,2.2818971901,-1.1759089232,-1.2885874733  
 H,0,1.0075835416,-0.6317159765,-2.4115605567  
 H,0,2.3966527867,-1.5518029303,-3.0299190452  
 H,0,4.6194798172,1.9829015174,-3.2508074657  
 H,0,3.1905285347,2.8963751551,-2.8148614811  
 H,0,3.8185085826,1.2799104661,-6.07308101  
 H,0,4.4863479581,2.7656242327,-6.7910388045  
 H,0,5.3912550714,1.9137069111,-5.5219890913  
 H,0,5.477772567,3.9206029587,-4.1703597297  
 H,0,4.6594028669,4.7458490933,-5.5142578778  
 H,0,3.9812286754,4.8404324406,-3.8754474012  
 H,0,2.543492918,3.9998697861,-6.2670982487  
 H,0,1.8642342176,2.4688445687,-5.6882927384  
 H,0,1.0578805687,3.568139052,-3.5998993158  
 H,0,1.5964210801,6.0348103394,-5.340336609  
 H,0,0.5467689872,5.9294306236,-3.8304503317

### TS N12 /6-31G\*/PCM

/home/bibaswanbiswas/c8/newMinnFunc/TSparentN12

parent ts exo s-cis

N12/6-31G\*

E(RN12) = -518.859025806

Zero-point correction= 0.223923 (Hartree/Particle)

Thermal correction to Energy= 0.236612  
 Thermal correction to Enthalpy= 0.237556  
 Thermal correction to Gibbs Free Energy= 0.185827  
 Sum of electronic and ZPE= -518.635102  
 Sum of electronic and thermal Energies= -518.622414  
 Sum of electronic and thermal Enthalpies= -518.621469  
 Sum of electronic and thermal Free Energies= -518.673198

E CV S  
 KCal/Mol Cal/Mol-K Cal/Mol-K  
 Total 148.476 46.954 108.873

C,0,2.0490754923,-0.8202855069,-2.378918837  
 O,0,2.7342699992,0.4095184195,-2.4793800431  
 C,0,2.8104394534,0.9437152042,-3.7336248204  
 C,0,3.4795834048,2.1904879947,-3.7123869101  
 N,0,3.8016935943,2.8913013774,-4.8569241793  
 C,0,4.6655550566,4.0398059666,-4.5734471815  
 O,0,2.3226615837,0.3586069398,-4.7040651241  
 C,0,4.2938783878,2.1146141628,-6.0014822734  
 C,0,2.1588480051,3.781536903,-5.6633740417  
 C,0,1.5197493012,4.2672374683,-4.5069511675  
 C,0,0.9517219228,3.4040540935,-3.6220041577  
 H,0,2.0892314482,-1.1014986488,-1.331178372  
 H,0,1.0109620185,-0.7256565957,-2.6954215837  
 H,0,2.5240920646,-1.5896732011,-2.9863934128  
 H,0,3.7382992329,2.6408111724,-2.7723104552  
 H,0,5.3027675852,1.7603653875,-5.7918744266  
 H,0,3.6329878472,1.2707460757,-6.1541514988  
 H,0,4.309376853,2.7517521444,-6.8809088502  
 H,0,5.6211398458,3.6954426987,-4.1799050337  
 H,0,4.8283095699,4.6019937125,-5.4868517795  
 H,0,4.1795941225,4.6747575992,-3.8396880426  
 H,0,2.5868118889,4.4702649037,-6.3792910895  
 H,0,1.8070636777,2.8485678231,-6.0816725312  
 H,0,1.6868628046,5.2968150047,-4.2134599841  
 H,0,0.7112737352,2.3933106164,-3.9149505409  
 H,0,0.5980051046,3.7288692844,-2.6534236632

### Cation/N12SX/6-31G\*/PCM-Conf2

/home/bibaswanbiswas/c8/newMinnFunc/SM2N12SX  
 parent sm conf 2  
 N12SX/6-31G\*  
 E(RN12SX) = -519.225340548

Zero-point correction= 0.245635 (Hartree/Particle)  
 Thermal correction to Energy= 0.258387  
 Thermal correction to Enthalpy= 0.259331  
 Thermal correction to Gibbs Free Energy= 0.206316  
 Sum of electronic and ZPE= -518.979705  
 Sum of electronic and thermal Energies= -518.966954  
 Sum of electronic and thermal Enthalpies= -518.966009  
 Sum of electronic and thermal Free Energies= -519.019024

E CV S  
 KCal/Mol Cal/Mol-K Cal/Mol-K  
 Total 162.140 46.381 111.579

C,0,2.0562441811,-0.8101113042,-2.2769408091  
 O,0,2.7892076254,0.4100953084,-2.4307669779  
 C,0,2.7834968007,0.9646651572,-3.6261628454

O,0,2.2078879347,0.5260615174,-4.5938503898  
 C,0,3.6142948463,2.2305015704,-3.5757234577  
 N,0,3.7094841649,2.9895402465,-4.8589049351  
 C,0,4.4058618069,2.1749494645,-5.9027436964  
 C,0,4.5209116361,4.2155375503,-4.5876463182  
 C,0,2.3387959085,3.4022207212,-5.3976529024  
 C,0,1.4895077728,4.1181758801,-4.4041243941  
 C,0,1.2028196126,5.4136776323,-4.4965873271  
 H,0,2.1849475624,-1.0999904892,-1.2408793037  
 H,0,1.0058667076,-0.6433998364,-2.5008893963  
 H,0,2.4581086681,-1.570997414,-2.94087206  
 H,0,4.6258538726,1.9720088542,-3.2691879871  
 H,0,3.2056171774,2.8946548067,-2.8178895742  
 H,0,3.8261683233,1.2797743606,-6.0906431187  
 H,0,4.4852150663,2.7716251764,-6.8059493879  
 H,0,5.3971145439,1.9205396477,-5.5400448482  
 H,0,5.4859042158,3.9174630823,-4.1903475916  
 H,0,4.6541407465,4.7535363129,-5.5206192089  
 H,0,3.9923636656,4.8369506672,-3.8728015368  
 H,0,2.5487228074,4.0267691632,-6.2618736083  
 H,0,1.8697947514,2.4807636325,-5.7283328605  
 H,0,1.043921468,3.5247739116,-3.6145140687  
 H,0,1.6054222514,6.0339116227,-5.2877631358  
 H,0,0.5413578819,5.8936207574,-3.7886112604

### TS N12SX /6-31G\*/PCM

/home/bibaswanbiswas/c8/newMinnFunc/TSparentN12SX  
 parent ts exo s-cis  
 N12SX/6-31G\*  
 E(RN12SX) = -518.702689131

Zero-point correction= 0.227999 (Hartree/Particle)  
 Thermal correction to Energy= 0.240447  
 Thermal correction to Enthalpy= 0.241391  
 Thermal correction to Gibbs Free Energy= 0.190073  
 Sum of electronic and ZPE= -518.474690  
 Sum of electronic and thermal Energies= -518.462242  
 Sum of electronic and thermal Enthalpies= -518.461298  
 Sum of electronic and thermal Free Energies= -518.512616

E CV S  
 KCal/Mol Cal/Mol-K Cal/Mol-K  
 Total 150.883 45.859 108.009  
 C,0,2.0354877349,-0.8004177525,-2.3548270511  
 O,0,2.7090309373,0.4379353926,-2.476326576  
 C,0,2.7766300822,0.9589915667,-3.7313466413  
 C,0,3.3870970636,2.2406442464,-3.7214866376  
 N,0,3.770800411,2.9073320703,-4.8712943284  
 C,0,4.6468972515,4.0436032668,-4.5746232581  
 O,0,2.3058012098,0.3522465495,-4.6945766119  
 C,0,4.2782297406,2.1150453827,-5.998356289  
 C,0,2.1527298599,3.8258004201,-5.6885034773  
 C,0,1.5307091608,4.2554871924,-4.5093572803  
 C,0,1.0720582713,3.3055370504,-3.6391989501  
 H,0,2.0766919133,-1.0647083282,-1.301945607  
 H,0,0.9970190545,-0.7179210948,-2.674383178  
 H,0,2.5208450307,-1.5733210211,-2.9496218665  
 H,0,3.7012800612,2.6600013709,-2.7822775499  
 H,0,5.2778618294,1.7440439005,-5.7669845835  
 H,0,3.6102091454,1.2802865896,-6.171239081

H,0,4.3252605947,2.7500242149,-6.8803206207  
 H,0,5.5855776519,3.6897707663,-4.1462369962  
 H,0,4.8503021892,4.5925707967,-5.4899705923  
 H,0,4.149785493,4.699156285,-3.8644626444  
 H,0,2.5908945663,4.5382148577,-6.3768752926  
 H,0,1.8106312451,2.9041123066,-6.1428261101  
 H,0,1.7078224175,5.265878805,-4.1577425788  
 H,0,0.7699903031,2.3329034338,-4.000834061  
 H,0,0.7746107819,3.5542427317,-2.6284221365

### Cation/ SOGGA11/6-31G\*/PCM-Conf2

/home/bibaswanbiswas/c8/newMinnFunc/SM2SOGGA11  
 parent sm conf 2  
 SOGGA11/6-31G\*  
 E(RSOGGA11) = -519.511656104

Zero-point correction= 0.238437 (Hartree/Particle)  
 Thermal correction to Energy= 0.251627  
 Thermal correction to Enthalpy= 0.252571  
 Thermal correction to Gibbs Free Energy= 0.198804  
 Sum of electronic and ZPE= -519.273219  
 Sum of electronic and thermal Energies= -519.260029  
 Sum of electronic and thermal Enthalpies= -519.259085  
 Sum of electronic and thermal Free Energies= -519.312852

| E                                            | CV        | S         |
|----------------------------------------------|-----------|-----------|
| KCal/Mol                                     | Cal/Mol-K | Cal/Mol-K |
| Total                                        | 157.898   | 48.019    |
| C,0,1.9820036548,-0.7625748243,-2.2069933209 |           |           |
| O,0,2.6997561064,0.4624778074,-2.4017430785  |           |           |
| C,0,2.8065637154,0.905543301,-3.653163056    |           |           |
| O,0,2.3274245157,0.3840177386,-4.6358261264  |           |           |
| C,0,3.6674515272,2.1700688296,-3.6121448478  |           |           |
| N,0,3.7362689209,2.9869346089,-4.8796345008  |           |           |
| C,0,4.4296816875,2.2235036397,-5.9788337023  |           |           |
| C,0,4.5567612281,4.2113811565,-4.5697834717  |           |           |
| C,0,2.342227481,3.425410937,-5.3960855501    |           |           |
| C,0,1.476682946,4.1080205336,-4.3896226502   |           |           |
| C,0,1.1320607194,5.3949704568,-4.4691662196  |           |           |
| H,0,1.9792150731,-0.9360317997,-1.1295661817 |           |           |
| H,0,0.9568555966,-0.6734240805,-2.5795750521 |           |           |
| H,0,2.4839072826,-1.5879926048,-2.7217461326 |           |           |
| H,0,4.6936309659,1.8852929563,-3.3644480054  |           |           |
| H,0,3.311547633,2.8237849162,-2.8167502212   |           |           |
| H,0,3.8495256684,1.3345307002,-6.2120558916  |           |           |
| H,0,4.5023931214,2.8735534331,-6.8509317524  |           |           |
| H,0,5.4279317738,1.951831097,-5.6330730594   |           |           |
| H,0,5.5341961279,3.8936586196,-4.2063556919  |           |           |
| H,0,4.669271638,4.7892487369,-5.4870333996   |           |           |
| H,0,4.0415138055,4.8035006432,-3.8154887125  |           |           |
| H,0,2.5559069586,4.0758663944,-6.2446323738  |           |           |
| H,0,1.8773626679,2.5091794745,-5.7591571107  |           |           |
| H,0,1.056554752,3.4898110527,-3.5991799926   |           |           |
| H,0,1.5077732133,6.045356907,-5.2565309771   |           |           |
| H,0,0.4445624962,5.8393973688,-3.7528019215  |           |           |

### TS SOGGA11 /6-31G\*/PCM

/home/bibaswanbiswas/c8/newMinnFunc/TSparentRSOGG  
 A11  
 parent ts exo s-cis

SOGGA11/6-31G\*  
 E(RSOGGA11) = -519.003299829

Zero-point correction= 0.221265 (Hartree/Particle)  
 Thermal correction to Energy= 0.234291  
 Thermal correction to Enthalpy= 0.235235  
 Thermal correction to Gibbs Free Energy= 0.182513  
 Sum of electronic and ZPE= -518.782035  
 Sum of electronic and thermal Energies= -518.769009  
 Sum of electronic and thermal Enthalpies= -518.768065  
 Sum of electronic and thermal Free Energies= -518.820786

| E        | CV        | S         |
|----------|-----------|-----------|
| KCal/Mol | Cal/Mol-K | Cal/Mol-K |
| Total    | 147.020   | 47.582    |

|                                              |
|----------------------------------------------|
| C,0,2.0564797802,-0.8334529944,-2.32627083   |
| O,0,2.7798781402,0.3718212073,-2.4720904918  |
| C,0,2.8464312617,0.8687242218,-3.7596730876  |
| C,0,3.5079333273,2.1301560287,-3.7458859324  |
| N,0,3.8106087223,2.8758132106,-4.8738969335  |
| C,0,4.6734602068,4.0320772245,-4.5564802909  |
| O,0,2.3662910416,0.2513817392,-4.7157485035  |
| C,0,4.3217330871,2.1466528706,-6.0553619746  |
| C,0,2.1641414241,3.7846330871,-5.6572731194  |
| C,0,1.5092894797,4.281797856,-4.5023037846   |
| C,0,0.8617998268,3.4627421462,-3.6298899216  |
| H,0,2.0818860756,-1.0816607265,-1.2609291967 |
| H,0,1.0134859762,-0.723010491,-2.6509419358  |
| H,0,2.5039766371,-1.6529530331,-2.9024837616 |
| H,0,3.7272461067,2.5898336618,-2.7954762567  |
| H,0,5.336361283,1.7919793432,-5.845972402    |
| H,0,3.6715317448,1.299571084,-6.2539206387   |
| H,0,4.3410592722,2.8240478598,-6.9106085252  |
| H,0,5.6437616676,3.6767147101,-4.1948353037  |
| H,0,4.8149408403,4.6345792767,-5.4544068259  |
| H,0,4.1936405708,4.6348907035,-3.7856811625  |
| H,0,2.6019405668,4.4815175471,-6.3671436283  |
| H,0,1.7874668747,2.866108758,-6.0968123791   |
| H,0,1.6982949106,5.3148221019,-4.2117654923  |
| H,0,0.6137750433,2.4398303315,-3.8917277591  |
| H,0,0.4868401325,3.8288432755,-2.6764598624  |

### Cation/ SOGGA11X /6-31G\*/PCM-Conf2

/home/bibaswanbiswas/c8/newMinnFunc/SM2SOGGA11X  
 parent sm conf 2  
 SOGGA11X/6-31G\*  
 E(RSOGGA11X) = -519.355548556

Zero-point correction= 0.246551 (Hartree/Particle)  
 Thermal correction to Energy= 0.259250  
 Thermal correction to Enthalpy= 0.260194  
 Thermal correction to Gibbs Free Energy= 0.207270  
 Sum of electronic and ZPE= -519.108998  
 Sum of electronic and thermal Energies= -519.096299  
 Sum of electronic and thermal Enthalpies= -519.095355  
 Sum of electronic and thermal Free Energies= -519.148278

| E        | CV        | S         |
|----------|-----------|-----------|
| KCal/Mol | Cal/Mol-K | Cal/Mol-K |

Total 162.682 46.145 111.387  
 C,0,2.0445472635,-0.8050728211,-2.2729718075  
 O,0,2.7943086836,0.4170624491,-2.418203596  
 C,0,2.7801603675,0.9681703745,-3.6191716474  
 O,0,2.1951968675,0.5325976289,-4.5838313072  
 C,0,3.6209361403,2.236052061,-3.5738105675  
 N,0,3.7143797523,2.9911294324,-4.8645330794  
 C,0,4.4144901202,2.1694072974,-5.9070359922  
 C,0,4.5304587942,4.2206370186,-4.5965052789  
 C,0,2.3431000174,3.4035840898,-5.4099054623  
 C,0,1.4766734171,4.1005745696,-4.4061185134  
 C,0,1.1912214898,5.4012364499,-4.476681724  
 H,0,2.1787095322,-1.0982353716,-1.2340845878  
 H,0,0.9915819716,-0.6229906338,-2.4917567908  
 H,0,2.4416943276,-1.5665317015,-2.9454387939  
 H,0,4.6369742361,1.9718831901,-3.2705668252  
 H,0,3.2145459495,2.9071689653,-2.8141568103  
 H,0,3.8332861621,1.2688173632,-6.091518739  
 H,0,4.4926701606,2.7654193963,-6.8164920727  
 H,0,5.4102421807,1.9181929814,-5.540310264  
 H,0,5.4994826802,3.9191214035,-4.1987937577  
 H,0,4.6628401223,4.7574411625,-5.5357420861  
 H,0,4.0021646628,4.846188684,-3.8779831236  
 H,0,2.5580830294,4.0484445339,-6.2641102073  
 H,0,1.8798757388,2.4820020401,-5.7616746725  
 H,0,1.0167590748,3.4877322577,-3.6331617476  
 H,0,1.606991312,6.039209732,-5.2531605665  
 H,0,0.5176579456,5.8680754468,-3.7646029797

### TS SOGGA11X /6-31G\*/PCM

/home/bibaswanbiswas/c8/newMinnFunc/TSparentRSOGGA11X  
 parent ts exo s-cis  
 SOGGA11X/6-31G\*  
 E(RSOGGA11X) = -518.827279415

Zero-point correction= 0.228862 (Hartree/Particle)  
 Thermal correction to Energy= 0.241196  
 Thermal correction to Enthalpy= 0.242141  
 Thermal correction to Gibbs Free Energy= 0.191092  
 Sum of electronic and ZPE= -518.598417  
 Sum of electronic and thermal Energies= -518.586083  
 Sum of electronic and thermal Enthalpies= -518.585139  
 Sum of electronic and thermal Free Energies= -518.636188

| E             | CV        | S         |
|---------------|-----------|-----------|
| KCal/Mol      | Cal/Mol-K | Cal/Mol-K |
| Total 151.353 | 45.547    | 107.442   |

C,0,2.0392457432,-0.8076916123,-2.3491661653  
 O,0,2.7124331903,0.4409415815,-2.4664164491  
 C,0,2.7679561999,0.9573465487,-3.7272756887  
 C,0,3.3682397852,2.2521112242,-3.7190483075  
 N,0,3.760402671,2.9129515553,-4.8760681687  
 C,0,4.6508850053,4.042684253,-4.57361537  
 O,0,2.2959892859,0.3462591075,-4.6877666119  
 C,0,4.2782730798,2.110791222,-5.9978119679  
 C,0,2.1435972704,3.8414664962,-5.6996449459  
 C,0,1.5210129559,4.2647360704,-4.5141626895  
 C,0,1.085143923,3.2943627455,-3.6447188412

H,0,2.0837639747,-1.0668626306,-1.2906734721  
 H,0,0.997172443,-0.7261969259,-2.6701062895  
 H,0,2.533846945,-1.5798093337,-2.9443437534  
 H,0,3.7004796442,2.6657470546,-2.7781122655  
 H,0,5.2725229504,1.7221408992,-5.7498473071  
 H,0,3.597851255,1.2844575228,-6.1887392907  
 H,0,4.3500081925,2.7531372709,-6.8790720819  
 H,0,5.5885101513,3.6780969951,-4.1394626632  
 H,0,4.8630696591,4.59170167,-5.4928960097  
 H,0,4.1547510374,4.7058230514,-3.8622160849  
 H,0,2.5836476199,4.5615178555,-6.3865471614  
 H,0,1.7997449393,2.9189713456,-6.162500555  
 H,0,1.7071996006,5.2735070392,-4.1486469551  
 H,0,0.7638379763,2.3283292147,-4.0211907286  
 H,0,0.7946685018,3.5309407794,-2.623990176

### Structures for Reactions of 5

#### TSCleavageA/ UB3LYP-D2/6-31G\*/PCM

/home/bibaswanbiswas/c11/cleavageAB3D2SB  
 trimethyl pure cleavage conf A  
 UB3LYP/6-31G\*  
 E(UB3LYP) = -636.975962660

|                                              |          |
|----------------------------------------------|----------|
| Zero-point correction=                       | 0.306380 |
| (Hartree/Particle)                           |          |
| Thermal correction to Energy=                | 0.323922 |
| Thermal correction to Enthalpy=              | 0.324867 |
| Thermal correction to Gibbs Free Energy=     | 0.261199 |
| Sum of electronic and zero-point Energies=   | -        |
| 636.669583                                   |          |
| Sum of electronic and thermal Energies=      | -        |
| 636.652040                                   |          |
| Sum of electronic and thermal Enthalpies=    | -        |
| 636.651096                                   |          |
| Sum of electronic and thermal Free Energies= | -        |
| 636.714763                                   |          |

|        | E (Thermal) | CV             | S        |
|--------|-------------|----------------|----------|
|        | KCal/Mol    | Cal/Mol-Kelvin | Cal/Mol- |
| Kelvin |             |                |          |
| Total  | 203.264     | 63.657         | 133.999  |
| C      | 0.96186     | 0.05852        | -1.11585 |
| C      | 2.23451     | -0.54129       | -1.02972 |
| C      | 3.39921     | 0.03075        | -0.56925 |
| C      | 3.51838     | 1.46587        | -0.13722 |
| C      | 4.67058     | -0.76706       | -0.49488 |
| N      | -0.15945    | -0.24764       | 0.82847  |
| C      | 0.79745     | 0.38775        | 1.74175  |
| C      | -1.41773    | 0.34013        | 0.71215  |
| C      | -1.64495    | 1.68974        | 1.34161  |
| C      | -2.33513    | -0.2014        | -0.24274 |
| C      | -0.07123    | -1.71616       | 0.94601  |
| H      | 4.52065     | -1.80463       | -0.81505 |
| H      | 5.45483     | -0.31884       | -1.1254  |
| H      | 5.07099     | -0.77378       | 0.53108  |
| H      | 4.27061     | 1.98828        | -0.74808 |
| H      | 2.57645     | 2.01639        | -0.2078  |
| H      | 3.87        | 1.52592        | 0.90379  |
| H      | 2.29362     | -1.59289       | -1.3139  |

H 0.83883 1.12812 -0.98334  
H 0.14725 -0.46113 -1.60582  
H 0.84583 1.46082 1.55765  
H 0.50921 0.20546 2.78626  
H 1.78074 -0.04876 1.55089  
H 0.96555 -2.00953 0.76267  
H -0.36575 -2.01269 1.9625  
H -0.72796 -2.17443 0.21135  
H -2.69582 1.96685 1.25076  
H -1.37769 1.69542 2.40647  
H -1.04977 2.48384 0.85964  
O -2.14357 -1.15262 -1.02073  
O -3.54574 0.4606 -0.24836  
C -4.49635 -0.02563 -1.19845  
H -5.37992 0.60622 -1.08043  
H -4.10769 0.05236 -2.22009  
H -4.75037 -1.07316 -1.00045

### TSCleavageB/ UB3LYP-D2/6-31G\*/ PCM

/home/bibaswanbiswas/c11/cleavageBB3D2SB  
trimethyl pure cleavage conf B  
UB3LYP/6-31G\*  
E(UB3LYP) = -636.976342409

Zero-point correction= 0.306776 (Hartree/Particle)  
Thermal correction to Energy= 0.324136  
Thermal correction to Enthalpy= 0.325081  
Thermal correction to Gibbs Free Energy= 0.262236  
Sum of electronic and ZPE= -636.669566  
Sum of electronic and thermal Energies= -636.652206  
Sum of electronic and thermal Enthalpies= -636.651262  
Sum of electronic and thermal Free Energies= -636.714106

| E             | CV        | S         |
|---------------|-----------|-----------|
| KCal/Mol      | Cal/Mol-K | Cal/Mol-K |
| Total 203.399 | 63.496    | 132.268   |

C,0,0.872752882,-0.1728587055,-0.9621135773  
C,0,2.2132613596,-0.6034704406,-0.8936508531  
C,0,3.2954914666,0.1615617617,-0.5204870944  
C,0,3.1953871901,1.6169224157,-0.1541050529  
C,0,4.6764237146,-0.4274655639,-0.4692327916  
N,0,-0.1531187028,-0.3376171624,1.0517264683  
C,0,0.885524265,0.1799987806,1.9611467536  
C,0,-1.3653416886,0.3462921175,0.9509834669  
C,0,-2.6200090805,-0.4478824324,0.6960161764  
C,0,-1.3278519825,1.7618122989,0.7632261062  
C,0,-0.219054196,-1.8020164959,1.1583648557  
H,0,4.6811108953,-1.4859345184,-0.7541818128  
H,0,5.3606376409,0.1155024686,-1.1404861591  
H,0,5.1049325726,-0.3359392166,0.5412906538  
H,0,3.6811499388,2.242565822,-0.9198575582  
H,0,2.1640375766,1.9574621605,-0.0276407449  
H,0,3.73631287,1.8058485073,0.7851569425  
H,0,2.408888652,-1.6535462354,-1.1155033037  
H,0,0.6203996585,0.8789900306,-0.9188992882  
H,0,0.1233612353,-0.8350748306,-1.3824390426  
H,0,0.9098348206,1.2641029922,1.9048136664  
H,0,0.6564907127,-0.1491278083,2.9843484124  
H,0,1.8491039273,-0.2310980077,1.6505648484  
H,0,0.7969758786,-2.1907191648,1.0586038325

H,0,-0.6299364426,-2.0957134823,2.1341728129  
H,0,-0.8388507763,-2.2155876131,0.3625780878  
H,0,-3.4852284107,0.2157789245,0.7116017041  
H,0,-2.6045627682,-0.9494849493,-0.2865844199  
H,0,-2.77456105,-1.2309943697,1.4497252153  
O,0,-0.3189578801,2.4851691844,0.6599410403  
O,0,-2.5866848245,2.3233117166,0.6923076181  
C,0,-2.6078423368,3.7349978289,0.4713573216  
H,0,-3.6642704646,4.0123238703,0.4405246306  
H,0,-2.099059324,4.2685511301,1.2821139524  
H,0,-2.1203973287,3.9926879865,-0.4758198676

### TSCleavageA/ UM062X/6-31G\*/PCM

/home/bibaswanbiswas/c11/cleavageAM062XSB  
trimethyl pure cleavage conf A  
UM062X/6-31G\*  
E(UM062X) = -636.614382233

Zero-point correction= 0.309673 (Hartree/Particle)  
Thermal correction to Energy= 0.327207  
Thermal correction to Enthalpy= 0.328151  
Thermal correction to Gibbs Free Energy= 0.264503  
Sum of electronic and ZPE= -636.304709  
Sum of electronic and thermal Energies= -636.287176  
Sum of electronic and thermal Enthalpies= -636.286232  
Sum of electronic and thermal Free Energies= -636.349879

| E             | CV        | S         |
|---------------|-----------|-----------|
| KCal/Mol      | Cal/Mol-K | Cal/Mol-K |
| Total 205.325 | 63.518    | 133.958   |

C,0,0.9507872778,0.0350160376,-1.0699864052  
C,0,2.2372713318,-0.5447608178,-1.0078149658  
C,0,3.4000723239,0.0450081421,-0.582448903  
C,0,3.5086078426,1.4828491599,-0.1645613874  
C,0,4.6818456566,-0.7338274147,-0.52575822  
N,0,-0.1685744879,-0.269482346,0.8491206837  
C,0,0.779346658,0.3503788638,1.7754044303  
C,0,-1.4074764822,0.3353680996,0.7191925326  
C,0,-1.6282153773,1.6928077109,1.3232652317  
C,0,-2.330644737,-0.2052535351,-0.2311742876  
C,0,-0.1008117135,-1.7349295241,0.9557577721  
H,0,4.5414088782,-1.7720212755,-0.8380848072  
H,0,5.446608044,-0.2802793067,-1.1701948155  
H,0,5.0965980532,-0.7327920482,0.4911366314  
H,0,4.279598364,1.9936766555,-0.7557221038  
H,0,2.5745419416,2.0370668036,-0.2754084118  
H,0,3.8233752955,1.5568680822,0.8850243676  
H,0,2.3036375106,-1.5960675264,-1.2909369962  
H,0,0.8117828012,1.105886779,-0.9581578047  
H,0,0.1470194547,-0.4951675505,-1.5681000675  
H,0,0.8474902442,1.4224059852,1.5934978576  
H,0,0.4729811992,0.1734187572,2.813902463  
H,0,1.7595686441,-0.1007057278,1.6058757236  
H,0,0.9355164429,-2.0400976309,0.7966459891  
H,0,-0.4200171826,-2.0348470125,1.9613111677  
H,0,-0.7442313522,-2.1853350074,0.2064760298  
H,0,-2.6756260941,1.9701961694,1.2175392037  
H,0,-1.3771277378,1.715911625,2.3891736314  
H,0,-1.0299588159,2.4753892174,0.8327171179

O,0,-2.1522139399,-1.1649994016,-0.9894014664  
 O,0,-3.5177248817,0.4747470681,-0.256209482  
 C,0,-4.4603748888,-0.000966734,-1.2063715106  
 H,0,-5.3284286121,0.6519498703,-1.1171153938  
 H,0,-4.0543865503,0.0486079254,-2.2198565687  
 H,0,-4.7448141106,-1.034635093,-0.9932512357

### TS23/ N12/6-31G\*/ exo s-cis /PCM(DMF)

/home/bibaswanbiswas/c11/obscure/me3TSN12normal  
 trimethyl ts exo s-cis  
 N12/6-31G\*  
 E(RN12) = -636.780168187

Zero-point correction= 0.308671 (Hartree/Particle)  
 Thermal correction to Energy= 0.325512  
 Thermal correction to Enthalpy= 0.326456  
 Thermal correction to Gibbs Free Energy= 0.265870  
 Sum of electronic and ZPE= -636.471498  
 Sum of electronic and thermal Energies= -636.454656  
 Sum of electronic and thermal Enthalpies= -636.453712  
 Sum of electronic and thermal Free Energies= -636.514298

| E             | CV        | S         |
|---------------|-----------|-----------|
| KCal/Mol      | Cal/Mol-K | Cal/Mol-K |
| Total 204.262 | 62.915    | 127.514   |

C,0,-0.1715715268,0.7048441087,0.52463348  
 C,0,0.3956347491,0.4590627633,1.7919959173  
 C,0,1.7360901208,0.4423714881,2.0614517443  
 C,0,2.7769006932,0.4468338518,0.9906072038  
 C,0,2.2259502437,0.3323638344,3.4679095638  
 N,0,-0.4345184883,2.7541455998,0.4109040105  
 C,0,-1.866494884,2.8470203983,0.7195816899  
 C,0,0.384799222,3.4776027871,1.2841602816  
 C,0,-0.1478383238,3.8051260704,2.6428463348  
 C,0,1.7392138823,3.7227458393,0.9563546077  
 C,0,-0.2414480376,2.9799460698,-1.0296467312  
 H,0,1.4149352407,0.3554253238,4.1927057986  
 H,0,2.7911192029,-0.5920334297,3.6158440676  
 H,0,2.9173654446,1.1445741005,3.7045900093  
 H,0,2.5064872338,-0.213981913,0.166205217  
 H,0,2.9009695793,1.4471133222,0.5580837988  
 H,0,3.740562466,0.1222096793,1.3792003032  
 H,0,-0.2838329321,0.3860838374,2.6339930877  
 H,0,0.4608833068,0.6202726746,-0.3474395771  
 H,0,-1.203078142,0.4302262819,0.3558564852  
 H,0,-2.0703474087,2.4681402897,1.7134149672  
 H,0,-2.1965267738,3.8832110624,0.6514936257  
 H,0,-2.4170592711,2.2541617298,-0.0028086891  
 H,0,-0.815309818,2.2390344361,-1.5780903365  
 H,0,-0.6016078057,3.9767579663,-1.2859210178  
 H,0,0.8127462336,2.9045403882,-1.2557974073  
 H,0,0.6346474704,4.2771392801,3.224664212  
 H,0,-1.0007413287,4.4879329754,2.6243133688  
 H,0,-0.468879854,2.913856106,3.1892526878  
 O,0,2.377506623,3.3526885492,-0.0439797526  
 O,0,2.3777371766,4.4888818402,1.9042693502  
 C,0,3.7194135881,4.8127539821,1.6246494253  
 H,0,4.0439719445,5.4631584531,2.4318383175  
 H,0,4.3528579387,3.9266841697,1.5946605451

H,0,3.8158612348,5.3322670838,0.6717774105

### TS CleavageA/ UM06/6-31G\*/PCM

/home/bibaswanbiswas/c11/cleavageAM06SB  
 trimethyl pure cleavage conf A  
 UM06/6-31G\*  
 E(UM06) = -636.475361474

Zero-point correction= 0.305133 (Hartree/Particle)  
 Thermal correction to Energy= 0.322776  
 Thermal correction to Enthalpy= 0.323720  
 Thermal correction to Gibbs Free Energy= 0.259429  
 Sum of electronic and ZPE= -636.170229  
 Sum of electronic and thermal Energies= -636.152585  
 Sum of electronic and thermal Enthalpies= -636.151641  
 Sum of electronic and thermal Free Energies= -636.215932

| E             | CV        | S         |
|---------------|-----------|-----------|
| KCal/Mol      | Cal/Mol-K | Cal/Mol-K |
| Total 202.545 | 64.024    | 135.312   |

C,0,0.9542306862,0.0057639336,-1.0119187567  
 C,0,2.24991062,-0.5521893838,-0.9587657612  
 C,0,3.4143391943,0.0691959403,-0.588011801  
 C,0,3.5196206388,1.5193088512,-0.2441285314  
 C,0,4.7006349861,-0.6876519124,-0.5297595624  
 N,0,-0.1680881961,-0.2984112868,0.8474078459  
 C,0,0.7582583438,0.2847245778,1.8139019715  
 C,0,-1.4127142358,0.324818327,0.7217473897  
 C,0,-1.6043156566,1.6846435698,1.3143904115  
 C,0,-2.326531863,-0.1960708768,-0.2428130057  
 C,0,-0.1469649522,-1.7636127417,0.9630595076  
 H,0,4.5747297917,-1.743610966,-0.7967426981  
 H,0,5.45139678,-0.2498371442,-1.2064663584  
 H,0,5.1422426107,-0.640521849,0.4784295576  
 H,0,4.2887187345,2.0061931665,-0.8632268107  
 H,0,2.5833812274,2.0720088469,-0.3760087642  
 H,0,3.8437528158,1.6515787335,0.800265847  
 H,0,2.3264121228,-1.6156101964,-1.2065932235  
 H,0,0.8083222247,1.0826874072,-0.9225212361  
 H,0,0.1597005882,-0.5265768672,-1.5307055912  
 H,0,0.8417677235,1.3641770575,1.6689998824  
 H,0,0.4231490225,0.0823902582,2.8424318002  
 H,0,1.7445683201,-0.1680724317,1.6635773181  
 H,0,0.8818046581,-2.1133481363,0.8251595295  
 H,0,-0.496086824,-2.0520801198,1.9654744365  
 H,0,-0.7946622288,-2.1971891793,0.2022061601  
 H,0,-2.634176194,2.0109755206,1.1553536478  
 H,0,-1.4111906251,1.7111061375,2.3964554578  
 H,0,-0.9512192012,2.4494540731,0.8571963065  
 O,0,-2.1502692076,-1.1454088397,-1.0153814736  
 O,0,-3.5149625173,0.4878859035,-0.2601251289  
 C,0,-4.4579344396,0.0277272255,-1.2099813934  
 H,0,-5.3302782647,0.6785531581,-1.1104547509  
 H,0,-4.0625064515,0.0905759203,-2.230935972  
 H,0,-4.7476092315,-1.012191677,-1.0160302503

### TS23/ UM062X/6-31G\*/ endo s-cis /PCM

/home/bibaswanbiswas/c11/allme3NCM062XSB  
 endo s-cis isomer of trimethylalanine system



um062X/6-31G\*

E(UM062X) = -636.627660384

Zero-point correction= 0.311847 (Hartree/Particle)

Thermal correction to Energy= 0.328356

Thermal correction to Enthalpy= 0.329300

Thermal correction to Gibbs Free Energy= 0.269695

Sum of electronic and ZPE= -636.315814

Sum of electronic and thermal Energies= -636.299305

Sum of electronic and thermal Enthalpies= -636.298361

Sum of electronic and thermal Free Energies= -636.357965

| E        | CV        | S              |
|----------|-----------|----------------|
| KCal/Mol | Cal/Mol-K | Cal/Mol-K      |
| Total    | 206.046   | 62.322 125.449 |

C,0,-0.1804468171,0.4762427891,0.2513172089  
 C,0,0.0990370625,0.1782666755,1.5850693798  
 C,0,1.3390772718,0.3893285586,2.1528033852  
 C,0,1.501886509,0.3106574506,3.6459649546  
 C,0,0.8669272977,2.9180892638,1.3790320534  
 C,0,2.2252721579,3.3728523419,0.9169020567  
 C,0,2.6300593947,0.2975170779,1.3884084469  
 N,0,-0.0832557506,2.5796879381,0.4199190688  
 C,0,0.2341333775,2.9758628389,-0.9612075318  
 C,0,0.4968056772,3.0155573952,2.7644622146  
 O,0,1.5308611425,3.4877948811,3.5368280676  
 C,0,1.2227782525,3.6426642416,4.9148259471  
 C,0,-1.5052520339,2.8668294854,0.7023011221  
 O,0,-0.5803597538,2.7468082195,3.298964544  
 H,0,0.5520682817,0.4889300261,4.1579692105  
 H,0,1.8849990478,-0.6743203774,3.946338628  
 H,0,2.2273000721,1.0564665427,3.9921900791  
 H,0,3.3544030512,1.0376665688,1.7446332732  
 H,0,3.07987674,-0.6910173437,1.5571550963  
 H,0,2.5116803712,0.4278035166,0.310797452  
 H,0,-0.7470266118,0.0887281193,2.2650807637  
 H,0,0.5996965009,0.4279387452,-0.5033866773  
 H,0,-1.188841474,0.3451760265,-0.1328484942  
 H,0,-1.8265639984,2.3174464595,1.5798620599  
 H,0,-1.636658058,3.9403364949,0.8778912431  
 H,0,-2.0868073896,2.5673921752,-0.1709398117  
 H,0,-0.4973600247,2.5141216083,-1.6259318657  
 H,0,0.1831840817,4.0656783949,-1.0680439821  
 H,0,1.2265886281,2.6309378731,-1.2447061105  
 H,0,2.1851771522,4.336185587,0.390446258  
 H,0,2.8822905893,3.4911054292,1.7764945105  
 H,0,2.7043442685,2.657654973,0.2393177076  
 H,0,2.136843684,4.0080183151,5.3836228552  
 H,0,0.4143453607,4.3650919276,5.0560919618  
 H,0,0.9256649393,2.6914347808,5.3631239248

**TS23/ UM06/6-31G\*/ endo s-trans /PCM**

/home/bibaswanbiswas/c11/allme3NTM06SB  
 endo s-trans isomer of trimethylalanine system  
 um06/6-31G\*  
 E(UM06) = -636.483393128

Zero-point correction= 0.308783 (Hartree/Particle)  
 Thermal correction to Energy= 0.324717

Thermal correction to Enthalpy= 0.325661

Thermal correction to Gibbs Free Energy= 0.268103

Sum of electronic and ZPE= -636.174611

Sum of electronic and thermal Energies= -636.158676

Sum of electronic and thermal Enthalpies= -636.157732

Sum of electronic and thermal Free Energies= -636.215290

| E        | CV        | S              |
|----------|-----------|----------------|
| KCal/Mol | Cal/Mol-K | Cal/Mol-K      |
| Total    | 203.763   | 62.069 121.142 |

C,0,-0.0473749285,0.4816483307,0.0764154437  
 C,0,0.1192851936,0.085816142,1.4065039041  
 C,0,1.2920684298,0.1838640465,2.1158664475  
 C,0,2.6490573679,0.2605484762,1.4991386548  
 C,0,1.3066643629,0.0277928524,3.5985877754  
 N,0,-0.1333667834,2.6043766603,0.3704621091  
 C,0,-1.5776854671,2.7684042343,0.6152726887  
 C,0,0.7787260635,2.9893720367,1.3536863828  
 C,0,0.5439873816,2.9863597736,2.7666292153  
 O,0,1.3915707633,3.3008818531,3.611307226  
 C,0,2.1510157495,3.3982863344,0.9167004882  
 C,0,0.1745950013,3.0784508521,-0.9869558254  
 O,0,-0.718792924,2.6510637042,3.1803619756  
 C,0,-0.9694409404,2.82330213,4.5629967697  
 H,0,0.3198420176,-0.2300468464,4.0024817747  
 H,0,2.0266520812,-0.7413409146,3.9175805472  
 H,0,1.6320717551,0.9763869404,4.0635657645  
 H,0,3.2447781445,1.0648318605,1.9572770211  
 H,0,3.197549849,-0.6748285654,1.6937988526  
 H,0,2.6393460971,0.4174672556,0.415427533  
 H,0,-0.7902513682,-0.0879550123,1.9885501357  
 H,0,0.8072386322,0.5345146281,-0.5978277407  
 H,0,-1.0057472905,0.3285137455,-0.4190512666  
 H,0,-1.9025882839,2.1331340773,1.4354739147  
 H,0,-1.7982542369,3.8160870962,0.8616273066  
 H,0,-2.1131588162,2.4910404663,-0.2976016384  
 H,0,-0.5029723563,2.5868737462,-1.6912948764  
 H,0,0.0334417746,4.1672627712,-1.0525376762  
 H,0,1.2001082291,2.8329887768,-1.2676650508  
 H,0,2.1548529548,4.3241484627,0.3211205706  
 H,0,2.7584946091,3.5752848259,1.8074562216  
 H,0,2.665458134,2.6324253361,0.3144106194  
 H,0,-2.0164738276,2.5473411979,4.7150066531  
 H,0,-0.3272019684,2.1832416425,5.1784128639  
 H,0,-0.8145234003,3.8652320828,4.8688902152

**TSCleavageA/ UM06/6-31+G\*\*/ PCM**

/home/bibaswanbiswas/c11/cleavageAM06PS  
 trimethyl pure cleavage conf A  
 UM06/6-31+G\*\*  
 E(UM06) = -636.521859139

Zero-point correction= 0.303596 (Hartree/Particle)  
 Thermal correction to Energy= 0.320985  
 Thermal correction to Enthalpy= 0.321929  
 Thermal correction to Gibbs Free Energy= 0.258927  
 Sum of electronic and ZPE= -636.218263  
 Sum of electronic and thermal Energies= -636.200874  
 Sum of electronic and thermal Enthalpies= -636.199930

Sum of electronic and thermal Free Energies= -636.262932

E CV S  
KCal/Mol Cal/Mol-K Cal/Mol-K  
Total 201.421 64.267 132.600

C,0,0.9923676419,0.0280016999,-1.0227931804  
C,0,2.2841265363,-0.5389304493,-0.9591626444  
C,0,3.4473439242,0.0799201121,-0.5744867839  
C,0,3.5479906647,1.5272665269,-0.2199926923  
C,0,4.7326148457,-0.6777528454,-0.5099830016  
N,0,-0.1774651443,-0.3058482098,0.8226917602  
C,0,0.729735531,0.256321184,1.8239399222  
C,0,-1.4151821326,0.3282231636,0.686921027  
C,0,-1.5709053579,1.7132273029,1.2329965439  
C,0,-2.3606925641,-0.2072754344,-0.2381748119  
C,0,-0.1545108663,-1.7741046139,0.9203638649  
H,0,4.6063353819,-1.7324469936,-0.7757401282  
H,0,5.4833337068,-0.2393781672,-1.1838394175  
H,0,5.1668859818,-0.6262943671,0.4995669905  
H,0,4.3128633982,2.0179362779,-0.8384919917  
H,0,2.6104340248,2.0768138713,-0.3439244844  
H,0,3.8768764432,1.6481667757,0.8228225822  
H,0,2.3599680536,-1.5993855266,-1.2149888686  
H,0,0.8508806323,1.1021873755,-0.9154106182  
H,0,0.2055261957,-0.4955017763,-1.5587518535  
H,0,0.8457464095,1.3330087177,1.6944017084  
H,0,0.3520922401,0.0523435673,2.8361643997  
H,0,1.7088307994,-0.2177717248,1.70885191  
H,0,0.8812708342,-2.1131318015,0.8255925579  
H,0,-0.5432908671,-2.0742167555,1.9038674517  
H,0,-0.7637064528,-2.2117493341,0.1318929315  
H,0,-2.5828847141,2.0725256015,1.0443934937  
H,0,-1.3952963937,1.7697686117,2.3152006224  
H,0,-0.8808247267,2.4318737179,0.7591059524  
O,0,-2.2182511089,-1.1826852124,-0.9901923876  
O,0,-3.5428067701,0.4901778625,-0.2452409183  
C,0,-4.5336397268,0.0109941136,-1.1416875489  
H,0,-5.3956569516,0.6684377851,-1.0154100199  
H,0,-4.1853121001,0.050922041,-2.1791166886  
H,0,-4.8173663679,-1.0202580961,-0.9058996804

### TS23/ UM062X/6-31G\*/ endo s-trans / Gas

/home/bibaswanbiswas/c11/allme3NTM062XSB  
endo s-trans isomer of trimethylalanine system  
um062X/6-31G\*  
E(UM062X) = -636.617219503

Zero-point correction= 0.313451 (Hartree/Particle)  
Thermal correction to Energy= 0.329430  
Thermal correction to Enthalpy= 0.330374  
Thermal correction to Gibbs Free Energy= 0.272567  
Sum of electronic and ZPE= -636.303769  
Sum of electronic and thermal Energies= -636.287789  
Sum of electronic and thermal Enthalpies= -636.286845  
Sum of electronic and thermal Free Energies= -636.344652

E CV S  
KCal/Mol Cal/Mol-K Cal/Mol-K  
Total 206.720 61.600 121.665

C,0,0.0062835006,0.5084784462,0.0103230279  
C,0,0.1140253217,0.0868351913,1.3415343534  
C,0,1.2403593838,0.2611286523,2.1104218977  
C,0,2.6390346254,0.3361341275,1.5701283842  
C,0,1.1735761233,0.0986157702,3.600060813  
N,0,-0.1230321983,2.5630800213,0.3600411144  
C,0,-1.5629934645,2.674950966,0.6669682797  
C,0,0.8051226048,2.9302629844,1.3270302519  
C,0,0.5847591858,2.9580801219,2.7494984401  
O,0,1.4325619367,3.3058893285,3.5670955932  
C,0,2.1640369528,3.3822079737,0.8729387045  
C,0,0.1325968174,3.101610945,-0.9852842331  
O,0,-0.6617727269,2.5862773068,3.1869659773  
C,0,-0.8775499708,2.783057501,4.5772472715  
H,0,0.1458770578,-0.0435695536,3.9457264222  
H,0,1.7782826936,-0.7562888994,3.9301848669  
H,0,1.5869115753,0.9940072475,4.087449942  
H,0,3.1943769844,1.1535736877,2.0447171423  
H,0,3.1700370795,-0.5941474022,1.8137807119  
H,0,2.6843001547,0.4678159684,0.4874494467  
H,0,-0.8129455637,-0.1318263641,1.8707921428  
H,0,0.8959712767,0.589488948,-0.6090806018  
H,0,-0.9104084543,0.3141999396,-0.5421394373  
H,0,-1.8267976405,1.9906761757,1.4656731667  
H,0,-1.7981117092,3.6981201047,0.9768443965  
H,0,-2.1178127748,2.4235355366,-0.2389490833  
H,0,-0.5536548988,2.6214965498,-1.6851630393  
H,0,-0.0311784943,4.1858445028,-0.997840684  
H,0,1.1535573492,2.8884100248,-1.2949417734  
H,0,2.1338711916,4.3332109223,0.3245290486  
H,0,2.7812680609,3.5319695894,1.7581418749  
H,0,2.6678474035,2.6508506228,0.2266171261  
H,0,-1.912363262,2.4889336747,4.7585254598  
H,0,-0.2001187634,2.1692570042,5.1748081529  
H,0,-0.7269453581,3.8306033839,4.8499798431

### TS23/ UM062X/6-31G\*/ exo s-trans / PCM

/home/bibaswanbiswas/c11/allme3XTM062XSB  
exo s-trans isomer of trimethylalanine system  
um062X/6-31G\*  
E(UM062X) = -636.624650896

Zero-point correction= 0.313316 (Hartree/Particle)  
Thermal correction to Energy= 0.329255  
Thermal correction to Enthalpy= 0.330200  
Thermal correction to Gibbs Free Energy= 0.272424  
Sum of electronic and ZPE= -636.311335  
Sum of electronic and thermal Energies= -636.295396  
Sum of electronic and thermal Enthalpies= -636.294451  
Sum of electronic and thermal Free Energies= -636.352227

E CV S  
KCal/Mol Cal/Mol-K Cal/Mol-K  
Total 206.611 61.497 121.600

C,0,-0.275612224,0.7099609689,0.214439431  
C,0,0.302817612,0.3601804197,1.44552669  
C,0,1.5831002556,0.7226815506,1.7867793782  
C,0,2.039390644,0.6992475665,3.2153831741

C,0,2.7041362241,0.8943190753,0.7985286108  
 N,0,-0.4554111078,2.7460830653,0.4949062461  
 C,0,-0.2765610898,3.2428718281,-0.8865855921  
 C,0,-1.8860902857,2.8434829438,0.8551345218  
 C,0,0.4101048297,3.1667852146,1.5117771601  
 C,0,1.7458098793,3.6462625811,1.3364796638  
 O,0,2.1977892277,3.7305886165,0.0473890131  
 C,0,3.5083518879,4.2583348358,-0.102864373  
 C,0,-0.1094918889,3.176561683,2.9241078576  
 O,0,2.496783868,3.9821903707,2.2595481848  
 H,0,1.2192590409,0.4890392179,3.9074605744  
 H,0,2.8314295778,-0.0451663056,3.3708237141  
 H,0,2.4676198657,1.6815971832,3.4620634695  
 H,0,3.3849438311,1.6852557962,1.1320661847  
 H,0,3.2891304548,-0.0348798036,0.7603389377  
 H,0,2.3728044231,1.1338982889,-0.2128177209  
 H,0,-0.3747260839,0.0907114277,2.2558061041  
 H,0,0.3467971058,0.7921652527,-0.6718716312  
 H,0,-1.3055470483,0.4280049291,0.0102956942  
 H,0,-2.0900850775,2.2556944515,1.7481537836  
 H,0,-2.1602960558,3.8893718174,1.0286287099  
 H,0,-2.4790070735,2.4460123738,0.0314345249  
 H,0,-1.0539942144,2.7887131185,-1.5029499498  
 H,0,-0.378379038,4.3324232001,-0.9081982907  
 H,0,0.6989337046,2.9644920792,-1.267471074  
 H,0,0.7225854268,3.3990292018,3.5912094811  
 H,0,-0.8857947854,3.9352293966,3.0905355504  
 H,0,-0.5322718131,2.209618167,3.2230737749  
 H,0,3.696598895,4.2815676563,-1.1763868304  
 H,0,3.5725256594,5.2665509791,0.3134781245  
 H,0,4.2502963729,3.6268538522,0.3923629027

### TS23/ UM06/6-31G\*/ endo s-cis / PCM

/home/bibaswanbiswas/c11/allme3NCM06SB  
 endo s-cis isomer of trimethylalanine system  
 um06/6-31G\*  
 E(UM06) = -636.484358520

Zero-point correction= 0.308491 (Hartree/Particle)  
 Thermal correction to Energy= 0.324683  
 Thermal correction to Enthalpy= 0.325627  
 Thermal correction to Gibbs Free Energy= 0.266985  
 Sum of electronic and ZPE= -636.175868  
 Sum of electronic and thermal Energies= -636.159676  
 Sum of electronic and thermal Enthalpies= -636.158731  
 Sum of electronic and thermal Free Energies= -636.217373

| E             | CV        | S         |
|---------------|-----------|-----------|
| KCal/Mol      | Cal/Mol-K | Cal/Mol-K |
| Total 203.742 | 62.327    | 123.422   |

C,0,-0.1640312234,0.4768482549,0.2603814875  
 C,0,0.1168982902,0.1722108962,1.5929735355  
 C,0,1.3560176428,0.2805656923,2.1780481914  
 C,0,1.5091665717,0.1794089891,3.6599848824  
 C,0,0.8301649431,3.0253543136,1.3714146958  
 C,0,2.1994238511,3.4153376121,0.905450222  
 C,0,2.6456359895,0.2570223272,1.4260975358  
 N,0,-0.1059411095,2.6375254061,0.4141239939  
 C,0,0.2124050958,2.9918005678,-0.9731719603

C,0,0.4820757194,3.0587014667,2.7618464358  
 O,0,1.5471662377,3.4639639549,3.5398119842  
 C,0,1.248779168,3.6536829011,4.910103271  
 C,0,-1.5292751903,2.9232173952,0.6666644151  
 O,0,-0.5972866622,2.8119131377,3.3049379152  
 H,0,0.5416353373,0.1663220752,4.1752461211  
 H,0,2.0702253356,-0.7246472321,3.9456110708  
 H,0,2.0864349612,1.0375773346,4.0395850812  
 H,0,3.3347483591,1.0327578,1.7922964267  
 H,0,3.1548594384,-0.7060716664,1.5927982735  
 H,0,2.5331548463,0.386765047,0.3441484291  
 H,0,-0.7368025128,0.0778479822,2.2688555559  
 H,0,0.6173428433,0.4402973545,-0.4981258888  
 H,0,-1.1751339975,0.3492410881,-0.1241651374  
 H,0,-1.830690437,2.5021406513,1.622863524  
 H,0,-1.6834741412,4.012422651,0.6913168342  
 H,0,-2.1194444883,2.4957945392,-0.1497811959  
 H,0,-0.5190615185,2.5115568484,-1.6303366634  
 H,0,0.1591286353,4.0814715912,-1.1153842532  
 H,0,1.2077330096,2.6420088745,-1.2542033983  
 H,0,2.1931738294,4.3229072788,0.2815280957  
 H,0,2.8401087078,3.6144449003,1.7660898308  
 H,0,2.6969066203,2.6312725823,0.3133193206  
 H,0,2.1793643197,3.9869347408,5.377367213  
 H,0,0.4724532937,4.4165143907,5.0471132342  
 H,0,0.9088672344,2.7258232534,5.3859399211

### TS23/ UM062X/6-31G\* exo s-cis /PCM

/home/bibaswanbiswas/c11/allme3XCM062XSB  
 exo s-cis isomer of trimethylalanine system  
 um062X/6-31G\*  
 E(UM062X) = -636.626820538

Zero-point correction= 0.312284 (Hartree/Particle)  
 Thermal correction to Energy= 0.328784  
 Thermal correction to Enthalpy= 0.329728  
 Thermal correction to Gibbs Free Energy= 0.270034  
 Sum of electronic and ZPE= -636.314537  
 Sum of electronic and thermal Energies= -636.298037  
 Sum of electronic and thermal Enthalpies= -636.297092  
 Sum of electronic and thermal Free Energies= -636.356787

| E             | CV        | S         |
|---------------|-----------|-----------|
| KCal/Mol      | Cal/Mol-K | Cal/Mol-K |
| Total 206.315 | 62.172    | 125.637   |

C,0,-0.3466438234,0.6263672319,0.4011987831  
 C,0,0.2702460329,0.394603681,1.6402136746  
 C,0,1.5764714181,0.7446195511,1.8883971097  
 C,0,2.6484855275,0.7597666592,0.8335574088  
 C,0,2.0967111922,0.8147969383,3.2959669683  
 N,0,-0.4004384262,2.6956318046,0.4310453921  
 C,0,-1.8205305623,2.932519804,0.757353468  
 C,0,0.5021107905,3.1753715635,1.3852994592  
 C,0,-0.0002425345,3.3515668546,2.793179493  
 C,0,1.8211162245,3.5890057559,1.0246668788  
 C,0,-0.1721735806,3.0097838421,-0.9944354387  
 H,0,1.2957364499,0.7151464293,4.0339770856  
 H,0,2.8431028965,0.0310869014,3.4824966848

H,0,2.5976175707,1.7795545082,3.4509488406  
H,0,3.4010917285,1.5249200373,1.0484571028  
H,0,3.1631760803,-0.2109478373,0.8362464023  
H,0,2.2724959255,0.9491608913,-0.1727887886  
H,0,-0.3802137062,0.2401476698,2.5009713014  
H,0,0.2353261695,0.5701974352,-0.5138001395  
H,0,-1.3981953612,0.3805248085,0.2756900061  
H,0,-2.0735222199,2.476725442,1.7129318998  
H,0,-2.0226282476,4.0085432088,0.7955759257  
H,0,-2.4338188381,2.4773176396,-0.0208092274  
H,0,-0.9345692559,2.4864245001,-1.5743221669  
H,0,-0.2633468355,4.0891044929,-1.1554690388  
H,0,0.818988065,2.6892787249,-1.2939819264  
H,0,0.8371094009,3.5571004234,3.4574990002  
H,0,-0.7171142838,4.1781071243,2.8915632536  
H,0,-0.4977650305,2.4469220837,3.1625247708  
O,0,2.3609636267,3.6017277435,-0.084649857  
O,0,2.5409298619,4.0136149048,2.1194678  
C,0,3.8451264017,4.4933811604,1.8278860078  
H,0,4.2607015706,4.820009209,2.7813506215  
H,0,4.4725977609,3.7085763928,1.3970066349  
H,0,3.8074970116,5.3325034202,1.1283586092

H 4.5257 -1.79751 -0.82755  
H 5.46516 -0.30722 -1.10094  
H 5.0563 -0.78766 0.54222  
H 4.29355 1.98445 -0.7117  
H 2.58907 2.02398 -0.20755  
H 3.85417 1.51145 0.92684  
H 2.29874 -1.57818 -1.33803  
H 0.84653 1.14172 -0.97254  
H 0.15672 -0.43863 -1.62628  
H 0.84639 1.4558 1.5562  
H 0.50464 0.20094 2.78315  
H 1.7781 -0.05398 1.55278  
H 0.97771 -2.00747 0.76881  
H -0.36075 -2.01955 1.95765  
H -0.70753 -2.19402 0.20561  
H -2.68153 1.98349 1.22234  
H -1.36519 1.71417 2.37841  
H -1.03109 2.47261 0.81732  
O -2.16378 -1.18047 -1.00165  
O -3.55487 0.45576 -0.24677  
C -4.52503 -0.02849 -1.18495  
H -5.39529 0.61969 -1.06445  
H -4.14259 0.03449 -2.20908  
H -4.79272 -1.06787 -0.96771

### TS CleavageA/ UB3LYP-D2/6-31+G\*\*/ PCM

/home/bibaswanbiswas/c11/cleavageAB3D2PS  
trimethyl pure cleavage conf A  
UB3LYP/6-31+G\*\*

E(UB3LYP) = -637.029163479

Zero-point correction= 0.304002  
(Hartree/Particle)  
Thermal correction to Energy= 0.321694  
Thermal correction to Enthalpy= 0.322638  
Thermal correction to Gibbs Free Energy= 0.258567  
Sum of electronic and zero-point Energies= -  
636.725161  
Sum of electronic and thermal Energies= -  
636.707469  
Sum of electronic and thermal Enthalpies= -  
636.706525  
Sum of electronic and thermal Free Energies= -  
636.770597

|        | E (Thermal) | CV             | S        |
|--------|-------------|----------------|----------|
| Kelvin | KCal/Mol    | Cal/Mol-Kelvin | Cal/Mol- |
| Total  | 201.866     | 64.199         | 134.851  |

|   |          |          |          |
|---|----------|----------|----------|
| C | 0.97015  | 0.07593  | -1.12899 |
| C | 2.24082  | -0.53003 | -1.04338 |
| C | 3.40525  | 0.03581  | -0.56898 |
| C | 3.52406  | 1.46586  | -0.12123 |
| C | 4.67356  | -0.76628 | -0.4895  |
| N | -0.16151 | -0.25434 | 0.82581  |
| C | 0.79556  | 0.3839   | 1.73999  |
| C | -1.41902 | 0.33448  | 0.70547  |
| C | -1.63442 | 1.69629  | 1.31545  |
| C | -2.34672 | -0.2143  | -0.23368 |
| C | -0.06274 | -1.72343 | 0.9424   |

### TS23/ UM06/6-31G\*/ exo s-cis /PCM

/home/bibaswanbiswas/c11/allme3XCM06SB  
exo s-cis isomer of trimethylalanine system  
um06/6-31G\*

E(UM06) = -636.484224568

Zero-point correction= 0.308363 (Hartree/Particle)  
Thermal correction to Energy= 0.324628  
Thermal correction to Enthalpy= 0.325572  
Thermal correction to Gibbs Free Energy= 0.266850  
Sum of electronic and ZPE= -636.175862  
Sum of electronic and thermal Energies= -636.159596  
Sum of electronic and thermal Enthalpies= -636.158652  
Sum of electronic and thermal Free Energies= -636.217374

|       | E        | CV        | S         |
|-------|----------|-----------|-----------|
| Total | KCal/Mol | Cal/Mol-K | Cal/Mol-K |
| Total | 203.707  | 62.325    | 123.591   |

C,0,-0.3596457928,0.6022817651,0.5648361268  
C,0,0.3659359376,0.4437868886,1.7559747168  
C,0,1.7114489264,0.6772257898,1.8788822937  
C,0,2.6652157752,0.6553570904,0.7321288603  
C,0,2.3420387391,0.8152271056,3.2257442818  
N,0,-0.4379026409,2.7088519458,0.4250820902  
C,0,-1.873862657,2.9425072091,0.6510900934  
C,0,0.4058302294,3.3031054826,1.3710007595  
C,0,-0.1418906199,3.4661531525,2.7560375792  
C,0,1.7485777001,3.658925252,1.0639045029  
C,0,-0.1425070394,2.9030545049,-1.0049715224  
H,0,1.6044670618,0.7563169586,4.0355911855  
H,0,3.1116230317,0.0469206332,3.3980160653  
H,0,2.8509945775,1.7903852223,3.3021917217  
H,0,3.4439473075,-0.1005419152,0.9170983671  
H,0,2.1845485674,0.418824218,-0.224407518  
H,0,3.1769712132,1.6208513524,0.5995135561

H,0,-0.2119148787,0.3713830822,2.681936853  
 H,0,0.1364292158,0.4748242114,-0.3965758553  
 H,0,-1.4237627425,0.368832496,0.5547096443  
 H,0,-2.178911237,2.5798942817,1.6344185509  
 H,0,-2.1001930739,4.0152248468,0.5691106878  
 H,0,-2.4407441295,2.3968739929,-0.1089438713  
 H,0,-0.8637136661,2.3171758577,-1.5838230708  
 H,0,-0.2437161373,3.9660073837,-1.264961829  
 H,0,0.8740836123,2.5844294803,-1.2257433711  
 H,0,0.6576519869,3.7474978296,3.4435048025  
 H,0,-0.9259748958,4.2368697818,2.8262334456  
 H,0,-0.5835949805,2.5307228666,3.1347059426  
 O,0,2.356286745,3.5912578344,-0.0113876941  
 O,0,2.4102155184,4.1551450306,2.171099764  
 C,0,3.7562223264,4.5260294056,1.948521487  
 H,0,4.1060248817,4.9696816008,2.8848148825  
 H,0,4.3796762012,3.6560283543,1.7027213343  
 H,0,3.8465439371,5.2560500083,1.1355191369

### TS23/ B3LYP-D2/6-31G\*/exo-cis/ PCM

/home/bibaswanbiswas/c11/exocistsB3D2SB  
 2,3-rearrangement looking at effect of B3D3  
 freq=hpmodes  
 E(RB3LYP) = -636.982869586

Zero-point correction= 0.308691 (Hartree/Particle)  
 Thermal correction to Energy= 0.325316  
 Thermal correction to Enthalpy= 0.326260  
 Thermal correction to Gibbs Free Energy= 0.266139  
 Sum of electronic and ZPE= -636.674178  
 Sum of electronic and thermal Energies= -636.657554  
 Sum of electronic and thermal Enthalpies= -636.656610  
 Sum of electronic and thermal Free Energies= -636.716730

| E             | CV        | S         |
|---------------|-----------|-----------|
| KCal/Mol      | Cal/Mol-K | Cal/Mol-K |
| Total 204.139 | 62.583    | 126.535   |

C,0,-0.0899092224,0.6691163789,0.2394521644  
 C,0,0.3590730144,0.4114130625,1.5502554545  
 C,0,1.624665994,0.6901420473,2.0019436078  
 C,0,2.8445240202,0.7554358233,1.1267465305  
 C,0,1.910499675,0.7605568769,3.4753937631  
 N,0,-0.4517482639,2.732391293,0.4098857455  
 C,0,-1.8530156894,2.706364318,0.8805075589  
 C,0,0.4566105365,3.3153454917,1.3096259337  
 C,0,0.0095396691,3.5351444895,2.7349079741  
 C,0,1.7952203232,3.5684918424,0.8962645745  
 C,0,-0.4270707426,3.1606213827,-1.0095753923  
 H,0,1.0074471304,0.6126458524,4.0780098366  
 H,0,2.6625663928,0.0152357574,3.7761597363  
 H,0,2.3308785859,1.7489803633,3.7134285245  
 H,0,3.3839949715,-0.2030418609,1.1871015002  
 H,0,2.6190559919,0.9697064277,0.0813175516  
 H,0,3.5290613952,1.5331551567,1.4846398624  
 H,0,-0.408542523,0.2360416655,2.3048740986  
 H,0,0.6278477838,0.7592669375,-0.5694608412  
 H,0,-1.0865913183,0.3574853721,-0.0601771234  
 H,0,-1.9214927372,2.163945885,1.8230883763  
 H,0,-2.2245652777,3.7292628295,1.0127159468

H,0,-2.456619418,2.1942752554,0.1288092697  
 H,0,-1.0471180414,2.4653880551,-1.5822174276  
 H,0,-0.843357424,4.1736229216,-1.086812538  
 H,0,0.5991929631,3.1500737307,-1.3636446224  
 H,0,0.8325102737,3.9545978839,3.3128123529  
 H,0,-0.8394296059,4.2306149053,2.8057279345  
 H,0,-0.2971260965,2.6019025981,3.2273159173  
 O,0,2.3058263343,3.402040553,-0.2260917421  
 O,0,2.5844883925,4.0614875421,1.928132907  
 C,0,3.9123417646,4.4244593276,1.5488406292  
 H,0,4.3889006972,4.7903893016,2.461923405  
 H,0,4.4636805187,3.5640387447,1.1550342072  
 H,0,3.9050589327,5.2125627888,0.7866383236

### TS23/ MPW1KSCF/6-31G\*/ endo s-cis /PCM

/home/bibaswanbiswas/c11/me3alaMPW1KSBSCF  
 endo s-cis isomer of trimethylalanine system  
 mpwpw91/6-31G(d)  
 E(RmPW+HF-PW91) = -636.737347303

Zero-point correction= 0.318063 (Hartree/Particle)  
 Thermal correction to Energy= 0.334605  
 Thermal correction to Enthalpy= 0.335550  
 Thermal correction to Gibbs Free Energy= 0.275616  
 Sum of electronic and ZPE= -636.419284  
 Sum of electronic and thermal Energies= -636.402742  
 Sum of electronic and thermal Enthalpies= -636.401798  
 Sum of electronic and thermal Free Energies= -636.461731

| E             | CV        | S         |
|---------------|-----------|-----------|
| KCal/Mol      | Cal/Mol-K | Cal/Mol-K |
| Total 209.968 | 61.469    | 126.140   |

C,0,-0.3918180362,0.5312768287,0.5587274461  
 C,0,0.3240129352,0.4098914181,1.741119056  
 C,0,1.6605225566,0.70673373,1.8595892442  
 C,0,2.6175916743,0.6257694082,0.716396911  
 C,0,2.2873978926,0.8344045786,3.2098651689  
 N,0,-0.3998350809,2.7085603546,0.4365447837  
 C,0,-1.8169528023,2.9753055147,0.6678112371  
 C,0,0.4652676434,3.2051298295,1.3912452905  
 C,0,-0.0820873914,3.4020099503,2.7697475262  
 C,0,1.7840417176,3.637065299,1.080460137  
 C,0,-0.0908025586,2.8932076477,-0.9788742079  
 H,0,1.5420931563,0.8626693665,4.0018093174  
 H,0,2.9676302883,0.0020721445,3.4084032435  
 H,0,2.8808820068,1.7482354957,3.2703009891  
 H,0,3.4379030338,-0.0451559626,0.9806684563  
 H,0,2.153621918,0.2411990591,-0.1883962623  
 H,0,3.0564238835,1.5936469623,0.4683531066  
 H,0,-0.2467089189,0.330787715,2.6588221749  
 H,0,0.1018302067,0.4418457238,-0.3969880947  
 H,0,-1.4502244613,0.3145982527,0.5489385497  
 H,0,-2.1258909375,2.6200676547,1.6419473762  
 H,0,-2.0210002974,4.0446642646,0.5924831337  
 H,0,-2.3952358567,2.4527977756,-0.0869317252  
 H,0,-0.817651764,2.331566789,-1.5575441421  
 H,0,-0.160685113,3.9481280096,-1.2458466485  
 H,0,0.908331,2.5493786231,-1.1944965682  
 H,0,0.7255573266,3.5985471133,3.4631456058

H,0,-0.7825063187,4.2391713446,2.8320605537  
 H,0,-0.6103184727,2.5159611375,3.1220945802  
 O,0,2.3775041006,3.6047378861,0.0042484053  
 O,0,2.4218108232,4.1504261968,2.1689979699  
 C,0,3.7197984431,4.6445459097,1.9320212413  
 H,0,4.0667083919,5.0307842628,2.8846085406  
 H,0,4.3895855129,3.8604712772,1.5887265985  
 H,0,3.7096024985,5.4426594394,1.1935150053

### TS23/BH AND HLYP/6-31G\*/exo s-cis/PCM

/home/bibaswanbiswas/c11/obscure/exocistsBHHSB  
 2,3-rearrangement looking at effect of B3D3  
 freq=hpmodes  
 E(RBHandHLYP) = -636.513957631

Zero-point correction= 0.319942 (Hartree/Particle)  
 Thermal correction to Energy= 0.336476  
 Thermal correction to Enthalpy= 0.337420  
 Thermal correction to Gibbs Free Energy= 0.277422  
 Sum of electronic and ZPE= -636.194016  
 Sum of electronic and thermal Energies= -636.177482  
 Sum of electronic and thermal Enthalpies= -636.176538  
 Sum of electronic and thermal Free Energies= -636.236536

| E             | CV        | S         |
|---------------|-----------|-----------|
| KCal/Mol      | Cal/Mol-K | Cal/Mol-K |
| Total 211.142 | 61.221    | 126.277   |

C,0,-0.3945931961,0.5040270207,0.5884458678  
 C,0,0.3351528964,0.4093571411,1.7647453402  
 C,0,1.6776786577,0.6729249805,1.8724547449  
 C,0,2.6279170362,0.5841433442,0.7202607674  
 C,0,2.3158047967,0.8120150875,3.2199003822  
 N,0,-0.4112232938,2.7336840072,0.4275431243  
 C,0,-1.8368020631,2.9957460238,0.644257516  
 C,0,0.4480986764,3.2483450773,1.3807286118  
 C,0,-0.1066406837,3.4599614236,2.7593281706  
 C,0,1.7785134029,3.6464180921,1.0780114478  
 C,0,-0.0938299443,2.8907516796,-0.9951783788  
 H,0,1.5778822807,0.8380254522,4.0162333855  
 H,0,3.003726788,-0.0119589753,3.4163656488  
 H,0,2.9003933996,1.7301833618,3.2706952208  
 H,0,3.4481169466,-0.0856092678,0.9797760504  
 H,0,2.156627088,0.1991473582,-0.178091241  
 H,0,3.0633726159,1.5501920138,0.4692503024  
 H,0,-0.2278338863,0.3546377465,2.685887265  
 H,0,0.0827978574,0.4057502242,-0.3705888215  
 H,0,-1.4524286018,0.3002109422,0.5986711937  
 H,0,-2.1497578363,2.6610661315,1.6214008043  
 H,0,-2.0478345264,4.0599883271,0.5444142898  
 H,0,-2.4042061852,2.4539278593,-0.1014644364  
 H,0,-0.8237252481,2.3285290179,-1.5647466815  
 H,0,-0.1516368386,3.9398670355,-1.2801461313  
 H,0,0.8985920112,2.5326758885,-1.2025744014  
 H,0,0.6940111199,3.670788832,3.452684485  
 H,0,-0.8117140105,4.2916026682,2.8068379086  
 H,0,-0.6320291176,2.5781832129,3.1201778966  
 O,0,2.3779930529,3.591919021,0.0053915707  
 O,0,2.42522664,4.1568597387,2.1667275107  
 C,0,3.7330343164,4.6400594305,1.9371097906

H,0,4.0747392878,5.0269119443,2.8892474763  
 H,0,4.3965610705,3.8496171868,1.6034473815  
 H,0,3.7344144909,5.4332119724,1.1963699379

### TS23/B3LYP-D2/6-31+G\*\*/exo s-cis/PCM

/home/bibaswanbiswas/c11/exocistsB3D2PS  
 2,3-rearrangement looking at effect of B3D3  
 freq=hpmodes  
 E(RB3LYP) = -637.035481289

Zero-point correction= 0.306093 (Hartree/Particle)  
 Thermal correction to Energy= 0.322938  
 Thermal correction to Enthalpy= 0.323882  
 Thermal correction to Gibbs Free Energy= 0.263479  
 Sum of electronic and ZPE= -636.729389  
 Sum of electronic and thermal Energies= -636.712544  
 Sum of electronic and thermal Enthalpies= -636.711600  
 Sum of electronic and thermal Free Energies= -636.772002

| E             | CV        | S         |
|---------------|-----------|-----------|
| KCal/Mol      | Cal/Mol-K | Cal/Mol-K |
| Total 202.646 | 63.272    | 127.127   |

C,0,-0.067782467,0.6438793263,0.2095712575  
 C,0,0.3607156802,0.3948797499,1.5261344387  
 C,0,1.6207229041,0.6800744877,2.0019746911  
 C,0,2.8532063375,0.7488466238,1.1465469998  
 C,0,1.8782815566,0.7401670166,3.4809303081  
 N,0,-0.4532708928,2.7467387769,0.4128672849  
 C,0,-1.8487853768,2.6990181637,0.8995131042  
 C,0,0.4659511905,3.30526068,1.313505178  
 C,0,0.0283054351,3.5251015987,2.7427609974  
 C,0,1.798052359,3.5782948913,0.8891187955  
 C,0,-0.4469689442,3.186547402,-1.0032407993  
 H,0,0.965260334,0.5799693419,4.0633952497  
 H,0,2.6282603138,-0.0049995508,3.7841448227  
 H,0,2.2884137843,1.7266127169,3.7405967762  
 H,0,3.4033615291,-0.200235193,1.2381791437  
 H,0,2.6402657909,0.9321249762,0.0928474325  
 H,0,3.5225174312,1.541967314,1.497648823  
 H,0,-0.4167776062,0.2121544717,2.2680452211  
 H,0,0.6581086506,0.7707460351,-0.5862243929  
 H,0,-1.0659856935,0.3515189018,-0.1010319792  
 H,0,-1.9048570209,2.1399130947,1.8324095544  
 H,0,-2.2285875157,3.7156229649,1.0544006847  
 H,0,-2.4561437939,2.1954349386,0.1461942027  
 H,0,-1.0863698925,2.5046137654,-1.5691952974  
 H,0,-0.8520651959,4.2050639322,-1.0656413497  
 H,0,0.568795632,3.1653624442,-1.3850844513  
 H,0,0.8636203461,3.9078706009,3.3269533986  
 H,0,-0.7955458042,4.2482499881,2.8178886531  
 H,0,-0.3092629157,2.5973980732,3.2213999619  
 O,0,2.3013056409,3.4001017271,-0.2387834934  
 O,0,2.587598835,4.1003964747,1.9042618591  
 C,0,3.9232738132,4.4570465597,1.5291671998  
 H,0,4.3940824808,4.8250129141,2.4432633387  
 H,0,4.4699072838,3.5905708599,1.1442890431  
 H,0,3.9187947908,5.2418349316,0.7647673426

**TS23/UM06/6-31G\*/exo-trans/PCM**

/home/bibaswanbiswas/c11/allme3XTM06SB  
 exo s-trans isomer of trimethylalanine system  
 um06/6-31G\*  
 E(UM06) = -636.480877828

Zero-point correction= 0.308387 (Hartree/Particle)  
 Thermal correction to Energy= 0.324463  
 Thermal correction to Enthalpy= 0.325407  
 Thermal correction to Gibbs Free Energy= 0.267388  
 Sum of electronic and ZPE= -636.172491  
 Sum of electronic and thermal Energies= -636.156415  
 Sum of electronic and thermal Enthalpies= -636.155471  
 Sum of electronic and thermal Free Energies= -636.213490

| E             | CV        | S         |
|---------------|-----------|-----------|
| KCal/Mol      | Cal/Mol-K | Cal/Mol-K |
| Total 203.604 | 62.335    | 122.112   |

C,0,0.049256444,0.8198435278,-0.0649637651  
 C,0,0.412715011,0.3869881749,1.2078889044  
 C,0,1.6156071485,0.6653828277,1.8196186631  
 C,0,1.7673415624,0.525457904,3.2978734618  
 C,0,2.9047042721,0.8774781447,1.0987802175  
 N,0,-0.4828817527,2.8664567848,0.5277530097  
 C,0,-0.5632079996,3.5601510922,-0.7676991  
 C,0,-1.8469035128,2.6308329414,1.0117491153  
 C,0,0.4148144088,3.300393913,1.5059570329  
 C,0,1.7703415099,3.6593460662,1.2304863105  
 O,0,2.1576827322,3.5183459465,-0.0787147957  
 C,0,3.4595201599,3.9844717934,-0.3872399571  
 C,0,-0.0296722588,3.4067206794,2.9341106131  
 O,0,2.5856845603,4.0593970093,2.0676495623  
 H,0,0.817395605,0.3075719489,3.8014233535  
 H,0,2.4873290313,-0.2656608746,3.5606160548  
 H,0,2.172677807,1.4619484279,3.7151214695  
 H,0,3.4407374243,1.7474363632,1.5088955504  
 H,0,3.5564333776,0.0042353434,1.2645971574  
 H,0,2.7905177278,1.0138330986,0.01932425  
 H,0,-0.3956607277,0.0323706735,1.8561710228  
 H,0,0.8034262383,1.1599352203,-0.774109683  
 H,0,-0.9060233261,0.5264053149,-0.4980760413  
 H,0,-1.8464230078,1.9281538239,1.8482038109  
 H,0,-2.3134743456,3.5737103199,1.3315004311  
 H,0,-2.4410525323,2.2068494167,0.1969963304  
 H,0,-1.1555940702,2.9447921862,-1.4544659531  
 H,0,-1.0646644432,4.5306927805,-0.6354406863  
 H,0,0.428656556,3.7154606323,-1.1823187872  
 H,0,0.8076479774,3.7931588803,3.5208902611  
 H,0,-0.8749715114,4.0986322591,3.069624372  
 H,0,-0.3285194967,2.4468803643,3.3825940638  
 H,0,3.5755537122,3.8585804929,-1.4668729828  
 H,0,3.5760169926,5.0418078738,-0.1224748526  
 H,0,4.2329297262,3.4076716486,0.133137586

**TSCleavageA/UM062X/6-31+G\*\*/PCM**

/home/bibaswanbiswas/c11/cleavageAM062XPS  
 trimethyl pure cleavage conf A  
 UM062X/6-31+G\*\*  
 E(UM062X) = -636.657086476

Zero-point correction= 0.307011 (Hartree/Particle)  
 Thermal correction to Energy= 0.324770  
 Thermal correction to Enthalpy= 0.325714  
 Thermal correction to Gibbs Free Energy= 0.260977  
 Sum of electronic and ZPE= -636.350075  
 Sum of electronic and thermal Energies= -636.332316  
 Sum of electronic and thermal Enthalpies= -636.331372  
 Sum of electronic and thermal Free Energies= -636.396109

| E             | CV        | S         |
|---------------|-----------|-----------|
| KCal/Mol      | Cal/Mol-K | Cal/Mol-K |
| Total 203.796 | 64.043    | 136.250   |

C,0,0.9553871407,0.0689996306,-1.0727349545  
 C,0,2.2372577473,-0.5260308032,-1.0216998846  
 C,0,3.4055144541,0.0462303844,-0.5822540643  
 C,0,3.5255356054,1.4743935779,-0.1354349497  
 C,0,4.680368427,-0.7449695972,-0.5371336616  
 N,0,-0.1696421495,-0.2682691109,0.8479627406  
 C,0,0.7710958592,0.3547099394,1.7823746669  
 C,0,-1.4100220561,0.333004453,0.7122904676  
 C,0,-1.6220331827,1.7051102716,1.288579426  
 C,0,-2.3413561651,-0.2206046386,-0.2217171913  
 C,0,-0.0869258022,-1.7344823517,0.951629873  
 H,0,4.5315338329,-1.7754676656,-0.8687116222  
 H,0,5.4487081155,-0.2840780463,-1.1710704882  
 H,0,5.0897442951,-0.763971888,0.4812711394  
 H,0,4.3046567352,1.9863649319,-0.7138371237  
 H,0,2.5984150868,2.0403468539,-0.2390406641  
 H,0,3.8372531277,1.5216072973,0.9163628406  
 H,0,2.2944955413,-1.5716767215,-1.326286438  
 H,0,0.8253083783,1.1371093582,-0.9290647205  
 H,0,0.1481241753,-0.445011923,-1.5825839198  
 H,0,0.8373890196,1.4269833304,1.6059927269  
 H,0,0.4576601057,0.1711540714,2.8175746427  
 H,0,1.753497885,-0.0928680326,1.6187258458  
 H,0,0.9574682058,-2.0244642834,0.8213833187  
 H,0,-0.4275289074,-2.03879509,1.9490130828  
 H,0,-0.7020560658,-2.1970309813,0.1866198681  
 H,0,-2.6656842223,1.9905244221,1.1726334862  
 H,0,-1.3744788508,1.7477116988,2.3539069001  
 H,0,-1.0137946473,2.4680757583,0.7804463934  
 O,0,-2.1689841428,-1.1972231614,-0.9652771375  
 O,0,-3.5270598947,0.4631247539,-0.2575475515  
 C,0,-4.4848927476,-0.0197071962,-1.1934632127  
 H,0,-5.3440931836,0.6441981211,-1.1051399094  
 H,0,-4.0861842686,0.0123650608,-2.2102485469  
 H,0,-4.7772464512,-1.0459774238,-0.9580353784

**Polyrate structures for rearrangement of 5: B3LYP-D2/6-31+G\*\*/PCM****23 Starting Material**

pb3lypd2/geom/sm/ g091.log  
 sm for 23 from opt of ts  
 B3LYP/6-31+G\*\*  
 E(RB3LYP) = -637.056800173  
 Zero-point correction= 0.309833  
 (Hartree/Particle)  
 Thermal correction to Energy= 0.326548

Thermal correction to Enthalpy= 0.327492  
 Thermal correction to Gibbs Free Energy= 0.266676  
 Sum of electronic and zero-point Energies= -  
 636.746968  
 Sum of electronic and thermal Energies= -  
 636.730252  
 Sum of electronic and thermal Enthalpies= -  
 636.729308  
 Sum of electronic and thermal Free Energies= -  
 636.790124

|        | E (Thermal) | CV             | S        |
|--------|-------------|----------------|----------|
| Kelvin | KCal/Mol    | Cal/Mol-Kelvin | Cal/Mol- |
| Total  | 204.912     | 62.890         | 127.999  |

C,0,1.4846763454,0.9475808171,-1.3323944738  
 C,0,1.0457625478,2.0602645145,-0.4362992417  
 C,0,-0.2247591393,2.4277829553,-0.1911145892  
 C,0,-1.4472766018,1.7870875597,-0.7923237938  
 C,0,-0.5201024856,3.5460217453,0.7761402919  
 N,0,1.7647051994,-0.367360139,-0.5598126214  
 C,0,2.848375725,-0.1025848522,0.445098352  
 C,0,0.5235136685,-0.9018982347,0.1044084261  
 C,0,0.3683447106,-0.656214674,1.5825758622  
 C,0,-0.5191519974,-1.2615102035,-0.7406196032  
 C,0,2.3394193708,-1.3613127071,-1.5407037273  
 H,0,0.3941822551,3.9790982931,1.1949080609  
 H,0,-1.096894036,4.3402983594,0.2831778995  
 H,0,-1.142238737,3.1720078837,1.6015184845  
 H,0,-2.1274267716,2.563885481,-1.1664475318  
 H,0,-1.2222015308,1.0868409173,-1.5974443973  
 H,0,-1.9888294007,1.2319358135,-0.0143804201  
 H,0,1.8389051845,2.6043487301,0.0731422918  
 H,0,0.737963203,0.667662139,-2.0733689619  
 H,0,2.4244942817,1.1968764731,-1.8353505011  
 H,0,2.5083843399,0.6365641997,1.1659558884  
 H,0,3.0877279077,-1.0393238184,0.9480190634  
 H,0,3.7180255391,0.2734945894,-0.0963296101  
 H,0,3.2386745346,-0.9270640938,-1.9848747274  
 H,0,2.5822976972,-2.2667808203,-0.9835708845  
 H,0,1.5817069385,-1.5635650896,-2.2936442408  
 H,0,-0.5853680967,-1.0817825015,1.8986633081  
 H,0,1.1510071235,-1.1257220057,2.1939972652  
 H,0,0.351282542,0.4157013795,1.83900044  
 O,0,-0.5435163311,-1.2804192408,-2.0051325647  
 O,0,-1.6798845343,-1.6404121468,-0.0485799211  
 C,0,-2.8105480152,-1.9478775344,-0.8648925241  
 H,0,-3.6138192188,-2.2031725664,-0.1687135202  
 H,0,-3.1047606153,-1.0861055233,-1.4747640023  
 H,0,-2.6084466028,-2.7963906992,-1.5283197762

### 23 Product

pb3lypd2/geom/p/g091.log  
 B3LYP/6-31+G\*\*  
 E(RB3LYP) = -637.085989816

Zero-point correction= 0.309693  
 (Hartree/Particle)  
 Thermal correction to Energy= 0.326159

Thermal correction to Enthalpy= 0.327103  
 Thermal correction to Gibbs Free Energy= 0.267762  
 Sum of electronic and zero-point Energies= -  
 636.776297  
 Sum of electronic and thermal Energies= -  
 636.759831  
 Sum of electronic and thermal Enthalpies= -  
 636.758886  
 Sum of electronic and thermal Free Energies= -  
 636.818228

C,0,1.9035878192,2.2318895432,-1.3352584808  
 C,0,1.2449339646,2.0374675082,-0.1893731577  
 C,0,-0.1731308191,1.5229975942,-0.0275924204  
 C,0,-0.8041345181,1.0067820133,-1.3405003258  
 C,0,-1.0092886502,2.7730391766,0.3679617463  
 N,0,1.0430854135,-0.4450273805,1.0425955787  
 C,0,1.2085964292,-1.4004733754,2.1471599109  
 C,0,-0.1689028241,0.4017785246,1.1288270414  
 C,0,-0.1838756322,1.079341469,2.5219794608  
 C,0,-1.4648630119,-0.4420071879,1.0044078342  
 C,0,1.3340234945,-1.0991575591,-0.2401649416  
 H,0,-0.5496730281,3.3326721591,1.1874429526  
 H,0,-1.059504702,3.4344167836,-0.5031926586  
 H,0,-2.0253837588,2.4911677198,0.6562919954  
 H,0,-0.6991226504,1.7701273814,-2.1175341427  
 H,0,-0.3682649598,0.0780097981,-1.7083132666  
 H,0,-1.8767882093,0.8442244457,-1.1904020908  
 H,0,1.7212408331,2.3243970359,0.7461683297  
 H,0,1.4814279079,1.9565120224,-2.298283643  
 H,0,2.9000549061,2.6660246969,-1.3381228467  
 H,0,1.3255586724,-0.8849565082,3.1025913062  
 H,0,0.374613001,-2.1171077192,2.2276797579  
 H,0,2.1277643003,-1.9676155356,1.9722208929  
 H,0,1.4969522051,-0.3556131354,-1.0183328243  
 H,0,2.2721820469,-1.6525584936,-0.1262808043  
 H,0,0.5521124808,-1.8031337877,-0.55902938  
 H,0,-1.0200389923,1.7696126979,2.6084969712  
 H,0,-0.2944550608,0.3414320301,3.318813033  
 H,0,0.7556429266,1.6192404475,2.6712512993  
 O,0,-1.5183570476,-1.6074534412,0.6525010617  
 O,0,-2.5658689681,0.2622691655,1.3321484324  
 C,0,-3.8315611563,-0.4246968558,1.2009819499  
 H,0,-4.5873925296,0.3038284828,1.4944659991  
 H,0,-3.9783041027,-0.7426072462,0.1650046021  
 H,0,-3.8543787796,-1.2968224698,1.8596808277

### 23 Transition State

pb3lypd2/geom/ts/g091.log  
 alanine prenyl TSfreq  
 B3LYP/6-31+G\*\*  
 E(RB3LYP) = -637.038443161

Zero-point correction= 0.306141  
 (Hartree/Particle)  
 Thermal correction to Energy= 0.322963  
 Thermal correction to Enthalpy= 0.323907  
 Thermal correction to Gibbs Free Energy= 0.263544  
 Sum of electronic and zero-point Energies= -  
 636.732302



Sum of electronic and thermal Energies= -  
636.715480  
Sum of electronic and thermal Enthalpies= -  
636.714536  
Sum of electronic and thermal Free Energies= -  
636.774900

|        | E (Thermal)<br>KCal/Mol | CV<br>Cal/Mol-Kelvin | S<br>Cal/Mol- |
|--------|-------------------------|----------------------|---------------|
| Kelvin |                         |                      |               |
| Total  | 202.662                 | 63.207               | 127.046       |

C,0,-0.0711494365,0.6534223104,0.2120586619  
C,0,0.3595368194,0.4000549812,1.5285831057  
C,0,1.6196556726,0.6842974269,2.0019265126  
C,0,2.8513470929,0.7559656259,1.1455036  
C,0,1.8789860945,0.7506965606,3.4799959512  
N,0,-0.4528476097,2.7418043194,0.411096931  
C,0,-1.8488283417,2.6996356121,0.898461198  
C,0,0.4660189769,3.3047588665,1.3114069961  
C,0,0.0298750619,3.5121485453,2.7430267345  
C,0,1.7974245305,3.5774569654,0.8876441811  
C,0,-0.4459486683,3.1811858806,-1.0055674053  
H,0,0.9679817991,0.5867040981,4.0647677797  
H,0,2.6351962351,0.0127604754,3.7851837328  
H,0,2.2815861882,1.7419948628,3.7328745375  
H,0,3.4068761238,-0.1894547678,1.2417036216  
H,0,2.6367034935,0.9336315729,0.0913102846  
H,0,3.5153034605,1.5551989341,1.4930524807  
H,0,-0.4173153709,0.220517796,2.2718030331  
H,0,0.6544450008,0.7732114235,-0.5855002641  
H,0,-1.0689614779,0.3582940612,-0.0978809999  
H,0,-1.9074218015,2.1344438237,1.827570635  
H,0,-2.2213214054,3.7176260342,1.0605961552  
H,0,-2.4597832037,2.2049092123,0.1422905692  
H,0,-1.0920806912,2.5039135035,-1.5694695513  
H,0,-0.842286767,4.2030342238,-1.0673997637  
H,0,0.5691744301,3.1512301523,-1.3886168593  
H,0,0.8664122524,3.8868531585,3.3308078059  
H,0,-0.7931185344,4.235474489,2.8265066651  
H,0,-0.3084542661,2.5788808935,3.2101309294  
O,0,2.3011075583,4.0436560171,-0.2409739939  
O,0,2.5882896464,4.093225861,1.9055303063  
C,0,3.9241808282,4.4500013951,1.5321242688  
H,0,4.3941583104,4.8161548947,2.4474763248  
H,0,4.4709082461,3.5837085426,1.1469095366  
H,0,3.9207487529,5.2357632482,0.7686402981

## Polyrate structures for rearrangement of 5: M06/6-31+G\*\*/PCM

### 23 Starting Material

pm06only23/geom/sm/alanineprenyl23smm06631plusgst  
starp  
sm for 23 from opt of ts  
M06/6-31+G\*\*  
E(RM06) = -636.554189139

Zero-point correction= 0.308245 (Hartree/Particle)  
Thermal correction to Energy= 0.325010

Thermal correction to Enthalpy= 0.325954  
Thermal correction to Gibbs Free Energy= 0.265694  
Sum of electronic and ZPE= -636.245944  
Sum of electronic and thermal Energies= -636.229179  
Sum of electronic and thermal Enthalpies= -636.228235  
Sum of electronic and thermal Free Energies= -636.288495

|       | E        | CV        | S         |
|-------|----------|-----------|-----------|
|       | KCal/Mol | Cal/Mol-K | Cal/Mol-K |
| Total | 203.947  | 63.374    | 126.827   |

C,0,1.4534289807,0.9419096635,-1.3197179856  
C,0,1.0429666568,2.0639055153,-0.4355663187  
C,0,-0.2139456443,2.4742702393,-0.1964388234  
C,0,-1.4513208212,1.8650120562,-0.776306911  
C,0,-0.4714327515,3.6091480972,0.7461992758  
N,0,1.7462703963,-0.3634412715,-0.5535198845  
C,0,2.8220278385,-0.0966405521,0.4438821289  
C,0,0.5188693013,-0.9233259722,0.1118183056  
C,0,0.3563125672,-0.7247349551,1.5871005339  
C,0,-0.5187699018,-1.2813682105,-0.7417175141  
C,0,2.3256104103,-1.344456203,-1.5308997444  
H,0,0.4537136084,4.0338988143,1.1486946586  
H,0,-1.0382898198,4.4096782028,0.2524705456  
H,0,-1.0897042019,3.2670403193,1.5884915059  
H,0,-2.0864022917,2.6452636719,-1.2166530956  
H,0,-1.2597800256,1.0969303211,-1.5308070177  
H,0,-2.0423738811,1.3996613499,0.0267970918  
H,0,1.8516713926,2.6061735746,0.0590452313  
H,0,0.6917750011,0.6616666854,-2.0511855552  
H,0,2.3817300291,1.183639628,-1.8532728959  
H,0,2.4747494583,0.6078786615,-1.198222343  
H,0,3.1039328485,-1.0390257674,0.9176801029  
H,0,3.6808932695,0.3240207582,-0.0855386197  
H,0,3.2300727709,-0.9150334106,-1.9722389898  
H,0,2.5668454725,-2.2568152203,-0.9817605049  
H,0,1.5767444291,-1.5507479018,-2.2941858192  
H,0,-0.5806765725,-1.2014784962,1.8837913364  
H,0,1.1455580777,-1.1843051632,2.198308938  
H,0,0.2823437136,0.3341748265,1.8939375228  
O,0,-0.5432664496,-1.2730445263,-1.9963889037  
O,0,-1.6602459666,-1.6943857044,-0.0606645297  
C,0,-2.7713506708,-2.0204347761,-0.8724749572  
H,0,-3.5696646089,-2.3159231682,-0.1872098435  
H,0,-3.103044588,-1.1610666861,-1.4683854083  
H,0,-2.551023027,-2.8500894,-1.5539821986

### 23 Product

pm06only23/geom/p/alanineprenyl23pdtm06631plusgst  
starp  
23 product  
M06/6-31+G\*\*  
E(RM06) = -636.584166461

Zero-point correction= 0.307900 (Hartree/Particle)  
Thermal correction to Energy= 0.324587  
Thermal correction to Enthalpy= 0.325531  
Thermal correction to Gibbs Free Energy= 0.265848  
Sum of electronic and ZPE= -636.276266  
Sum of electronic and thermal Energies= -636.259580

Sum of electronic and thermal Enthalpies= -636.258636  
 Sum of electronic and thermal Free Energies= -636.318318

E CV S  
 KCal/Mol Cal/Mol-K Cal/Mol-K  
 Total 203.681 63.899 125.613

C,0,1.8862740754,2.233417533,-1.347090206  
 C,0,1.239496733,2.0216864595,-0.2013407867  
 C,0,-0.1752422235,1.5180726303,-0.0263320537  
 C,0,-0.8096444633,1.0094071305,-1.3284553596  
 C,0,-0.989157259,2.7699326929,0.3665041454  
 N,0,1.0225774361,-0.4470130149,1.0442833738  
 C,0,1.189209052,-1.3819110438,2.1507891388  
 C,0,-0.1778062177,0.4070728857,1.1235674078  
 C,0,-0.1936549231,1.0675006112,2.5111294614  
 C,0,-1.4657851323,-0.4268687777,0.9836030017  
 C,0,1.3426992311,-1.1125875348,-0.2137721759  
 H,0,-0.5218688213,3.338339189,1.1773740068  
 H,0,-1.0376659883,3.4321589383,-0.5059784108  
 H,0,-2.0136228342,-2.5163142552,0.6597576825  
 H,0,-0.7254395543,1.7753601375,-2.1076133005  
 H,0,-0.3718238286,0.0860194701,-1.7151199169  
 H,0,-1.8833748254,0.833350682,-1.1837852118  
 H,0,1.7323674079,2.3046620836,0.7316672157  
 H,0,1.4644744005,1.9739319549,-2.3169419538  
 H,0,2.8819174047,2.6703880176,-1.353372385  
 H,0,1.3028365264,-0.8664189959,3.1078819676  
 H,0,0.364545842,-2.1121740459,2.2393117812  
 H,0,2.1119257615,-1.947571877,1.9865532802  
 H,0,1.4458939425,-0.3941291613,-1.0279365781  
 H,0,2.3226436269,-1.5899133764,-0.0985119383  
 H,0,0.6165433993,-1.8888381853,-0.5028333398  
 H,0,-1.0046860678,1.7882943259,2.6042357405  
 H,0,-0.3451750113,0.328325238,3.3024610337  
 H,0,0.7602013159,1.5739355443,2.6965222477  
 O,0,-1.5269976856,-1.5609389981,0.556555661  
 O,0,-2.5546052985,0.2471588766,1.3829486337  
 C,0,-3.8077407687,-0.4235081904,1.2096490386  
 H,0,-4.5685842756,0.2659907175,1.5743010901  
 H,0,-3.9738432954,-0.6485912284,0.1514796817  
 H,0,-3.8284006812,-1.3528549433,1.7847980271

### 23 Transition State

pm06only23/geom/ts/alanineprenyl23tsm06631plusstarsta  
 rpcm  
 alanine prenyl TSfreq  
 M06/6-31+G\*\*  
 E(RM06) = -636.529717334

Zero-point correction= 0.303801 (Hartree/Particle)  
 Thermal correction to Energy= 0.321062  
 Thermal correction to Enthalpy= 0.322006  
 Thermal correction to Gibbs Free Energy= 0.260154  
 Sum of electronic and ZPE= -636.225916  
 Sum of electronic and thermal Energies= -636.208655  
 Sum of electronic and thermal Enthalpies= -636.207711  
 Sum of electronic and thermal Free Energies= -636.269563

E CV S

KCal/Mol Cal/Mol-K Cal/Mol-K  
 Total 201.469 64.166 130.179

C,0,-0.0967635102,0.5733433215,0.2479843634  
 C,0,0.3560741693,0.3734367964,1.552212669  
 C,0,1.6271619764,0.6628581776,1.9994840886  
 C,0,2.8288262866,0.7116961137,1.1151795494  
 C,0,1.9270550387,0.6812857028,3.4625831317  
 N,0,-0.4441797728,2.7513925886,0.4228822161  
 C,0,-1.8419709342,2.7486209027,0.8708871376  
 C,0,0.4693372423,3.2872262733,1.3313657656  
 C,0,0.0209606377,3.5563301171,2.7383390102  
 C,0,1.8005761836,3.583661651,0.9113156818  
 C,0,-0.3944807243,3.1583022193,-0.9915825953  
 H,0,1.0311544896,0.533191449,4.0750442098  
 H,0,2.6585994743,-0.0975743827,3.725229657  
 H,0,2.3853506673,1.6399315175,3.7480793153  
 H,0,3.3279352015,-0.2694525631,1.129354306  
 H,0,2.6062761683,0.9712741117,0.0773851763  
 H,0,3.5606938321,1.4401167785,1.4879420422  
 H,0,-0.4038469289,0.1883770631,2.3166906055  
 H,0,0.6047845178,0.6883705706,-0.575644125  
 H,0,-1.1089370139,0.2898303092,-0.0321680433  
 H,0,-1.9545243519,2.208974511,1.8124759563  
 H,0,-2.2082687216,3.7770990726,0.9966249432  
 H,0,-2.4515393668,2.2516809902,0.112761705  
 H,0,-1.0605137778,2.5033309633,-1.5612484484  
 H,0,-0.7442843618,4.1966070351,-1.087685474  
 H,0,0.6210010449,3.081536116,-1.3713252802  
 H,0,0.8727329636,3.8653947133,3.3446203297  
 H,0,-0.7315811049,4.3566243771,2.7989253741  
 H,0,-0.4149853967,2.6728773322,3.2234977508  
 O,0,2.3167817448,3.3878343672,-0.1978729349  
 O,0,2.5514315935,4.1610793458,1.9105448389  
 C,0,3.8667734619,4.5487486919,1.5459657395  
 H,0,4.3127473105,4.9779752546,2.4452605227  
 H,0,4.4628339179,3.6928666325,1.2115310368  
 H,0,3.8531870433,5.2983128795,0.7469337784

### Polyrate structures for rearrangement of 5: M062X/6-31+G\*\*/PCM

#### 23 Starting Material

pm0623/geom/sm/alanineprenyl23smm062x631plusstarsta  
 arpcm  
 sm for 23 from opt of ts  
 m062x/6-31+G\*\*  
 E(RM062X) = -636.700911132

Zero-point correction= 0.313391 (Hartree/Particle)  
 Thermal correction to Energy= 0.330063  
 Thermal correction to Enthalpy= 0.331007  
 Thermal correction to Gibbs Free Energy= 0.270419  
 Sum of electronic and ZPE= -636.387521  
 Sum of electronic and thermal Energies= -636.370848  
 Sum of electronic and thermal Enthalpies= -636.369904  
 Sum of electronic and thermal Free Energies= -636.430493

E CV S  
 KCal/Mol Cal/Mol-K Cal/Mol-K

Total 207.118 62.441 127.519

C,0,1.4584992874,0.9297615226,-1.3432165067  
 C,0,1.0565837422,2.0684336546,-0.4593737405  
 C,0,-0.2006833018,2.4436681586,-0.1781096807  
 C,0,-1.4420819195,1.7723778809,-0.6991304425  
 C,0,-0.4606140274,3.5974123671,0.7537525743  
 N,0,1.7456763513,-0.3581883775,-0.5615850793  
 C,0,2.8104173671,-0.0777779167,0.4482418744  
 C,0,0.5098562453,-0.8944585761,0.0979998108  
 C,0,0.3309932941,-0.674052431,1.5734403763  
 C,0,-0.5166636392,-1.2675725626,-0.7544943714  
 C,0,2.3290134829,-1.358499082,-1.5195196147  
 H,0,0.465734649,4.0379121925,1.1290432174  
 H,0,-1.0423258903,4.3764701589,0.2485994891  
 H,0,-1.05889224,3.2600459748,1.6086057497  
 H,0,-2.1592860365,2.5272476796,-1.039546008  
 H,0,-1.2506476944,1.0695481985,-1.5112778009  
 H,0,-1.9220006793,1.2134763837,0.1149978673  
 H,0,1.8694781028,2.6385361226,-0.0121441787  
 H,0,0.6893363935,0.6495311282,-2.062511619  
 H,0,2.3819118076,1.1672090256,-1.8805315995  
 H,0,2.4481151869,0.6399242145,1.1796216073  
 H,0,3.0771292083,-1.0127806729,0.9397548074  
 H,0,3.6745062349,0.3300155122,-0.0777700457  
 H,0,3.2435035681,-0.9412134019,-1.9452830155  
 H,0,2.5495210854,-2.2636595293,-0.9549430465  
 H,0,1.5915565207,-1.5611459456,-2.2909462229  
 H,0,-0.6123692625,-1.1372943806,1.8620974181  
 H,0,1.1124157809,-1.1302896037,2.1920603868  
 H,0,0.2681146803,0.3899070152,1.8514308385  
 O,0,-0.5284621147,-1.2802995016,-2.0139974213  
 O,0,-1.6690787466,-1.662932635,-0.0831250787  
 C,0,-2.7770591758,-1.978308216,-0.9105307161  
 H,0,-3.5864536047,-2.2488762365,-0.2314314983  
 H,0,-3.0756258373,-1.1184316956,-1.5175387227  
 H,0,-2.5558938186,-2.8177414253,-1.5751156078

### 23 Product

pm0623/geom/p/alanineprenyl23pdtm062x631plusgstarstar  
 pcm  
 23 product  
 m062x/6-31+G\*\*  
 E(RM062X) = -636.730284009

Zero-point correction= 0.312703 (Hartree/Particle)  
 Thermal correction to Energy= 0.329204  
 Thermal correction to Enthalpy= 0.330148  
 Thermal correction to Gibbs Free Energy= 0.270955  
 Sum of electronic and ZPE= -636.417581  
 Sum of electronic and thermal Energies= -636.401080  
 Sum of electronic and thermal Enthalpies= -636.400136  
 Sum of electronic and thermal Free Energies= -636.459329

E CV S  
 KCal/Mol Cal/Mol-K Cal/Mol-K  
 Total 206.579 63.125 124.582

C,0,1.8793957426,2.2109073683,-1.3632725251

C,0,1.2451660138,2.0222859089,-0.2062587707  
 C,0,-0.1744416023,1.5244843344,-0.0155512312  
 C,0,-0.8269192102,1.016692385,-1.3148692872  
 C,0,-0.9845996273,2.778273967,0.3975885675  
 N,0,1.0422827026,-0.4332982717,1.0452480794  
 C,0,1.2096509049,-1.3679896982,2.1589564865  
 C,0,-0.1649232701,0.4074503646,1.1295332952  
 C,0,-0.2006912837,1.0613740392,2.526045063  
 C,0,-1.4511831555,-0.4358696637,0.9905341751  
 C,0,1.3247677124,-1.1060415274,-0.22386756  
 H,0,-0.5060081909,3.3291135707,1.2107887532  
 H,0,-1.0376789884,3.4465142795,-0.4667274507  
 H,0,-2.0026947556,2.5165932654,0.6969343434  
 H,0,-0.7463436921,1.7812493413,-2.0922933883  
 H,0,-0.396203816,0.0917677027,-1.6997435977  
 H,0,-1.8960564339,0.8474701341,-1.1486240492  
 H,0,1.7491435251,2.3073767014,0.7171671248  
 H,0,1.4400258188,1.940773313,-2.3196845153  
 H,0,2.8782501987,2.6352129972,-1.3854293495  
 H,0,1.3701527903,-0.839687671,3.0994517959  
 H,0,0.3613871926,-2.0603480238,2.2785398863  
 H,0,2.1045088847,-1.9643582683,1.9694115174  
 H,0,1.4502330652,-0.3801190381,-1.0243689899  
 H,0,2.2818199442,-1.6234537665,-0.1158226054  
 H,0,0.5634077608,-1.8433188691,-0.5110449097  
 H,0,-1.0355957598,1.7522783099,2.6122551162  
 H,0,-0.3269872533,0.3113380823,3.3083863368  
 H,0,0.7356488589,1.5967428753,2.707843191  
 O,0,-1.5003102381,-1.5937072146,0.6347436242  
 O,0,-2.5514756569,0.2609564815,1.3095006626  
 C,0,-3.799267196,-0.4277868202,1.1538012298  
 H,0,-4.5672497288,0.2860987939,1.4431433981  
 H,0,-3.9312980654,-0.7343494467,0.1140591804  
 H,0,-3.8274261908,-1.3066259359,1.7999164029

### 23 Transition State

pm0623/geom/ts/alanineprenyl23tsm062x631plusgstarstar  
 cm  
 alanine prenyl TSfreq  
 M062x/6-31+G\*\*  
 E(RM062X) = -636.669052060

Zero-point correction= 0.310285 (Hartree/Particle)  
 Thermal correction to Energy= 0.326670  
 Thermal correction to Enthalpy= 0.327615  
 Thermal correction to Gibbs Free Energy= 0.268567  
 Sum of electronic and ZPE= -636.358767  
 Sum of electronic and thermal Energies= -636.342382  
 Sum of electronic and thermal Enthalpies= -636.341437  
 Sum of electronic and thermal Free Energies= -636.400486

E CV S  
 KCal/Mol Cal/Mol-K Cal/Mol-K  
 Total 204.989 62.372 124.277

C,0,-0.3044454378,0.5661859359,0.4335824281  
 C,0,0.3117070217,0.3894461711,1.6811629742  
 C,0,1.6116351182,0.7763004301,1.9270903852  
 C,0,2.6882809513,0.7876243167,0.8773580043  
 C,0,2.1219511777,0.88649285,3.3355380128

N,0,-0.4136766219,2.6604975751,0.4198765702  
 C,0,-1.8382639263,2.8704440583,0.7486704839  
 C,0,0.483607709,3.167439842,1.3637646054  
 C,0,-0.0201257197,3.3687612474,2.7689201608  
 C,0,1.7928178691,3.6047609818,0.9919245768  
 C,0,-0.1984724756,2.9417328411,-1.0150623904  
 H,0,1.3182693163,0.7939336764,4.0707859205  
 H,0,2.8742268936,0.1135814489,3.5406858696  
 H,0,2.6139308949,1.8581500383,3.4736228624  
 H,0,3.2063150443,-0.1807690251,0.8923677239  
 H,0,2.3173662872,0.9661143392,-0.132715371  
 H,0,3.4366635888,1.5570140534,1.092420703  
 H,0,-0.3383874594,0.2416296319,2.5431596604  
 H,0,0.284263686,0.5217756267,-0.4772626086  
 H,0,-1.3510310405,0.2994486557,0.3122485987  
 H,0,-2.0781915856,2.4285025666,1.7135667978  
 H,0,-2.0653298007,3.9421695306,0.7667169675  
 H,0,-2.4431591263,2.3861194528,-0.0174365824  
 H,0,-0.9642323262,2.4016190967,-1.5739695932  
 H,0,-0.2958943917,4.0163700031,-1.2025530266  
 H,0,0.7893390956,2.6169755359,-1.3213775655  
 H,0,0.8137351208,3.5971432272,3.4292943686  
 H,0,-0.7434299329,4.1911643969,2.8439915005  
 H,0,-0.5095631473,2.4681437101,3.1557873576  
 O,0,2.3227106271,3.6146093617,-0.1261554295  
 O,0,2.5127410336,4.056301066,2.0730766297  
 C,0,3.8183986158,4.5409621723,1.7817306646  
 H,0,4.2347043411,4.8569636685,2.737757578  
 H,0,4.4418154424,3.7579465512,1.3429413878  
 H,0,3.7761221576,5.3876059654,1.0920637746

### Polyrate structures for C-N Bond Cleavage in 5: B3LYP-D2/6- 31+G\*\*/PCM

#### Cleavage A Starting Material

SM\_Ylide\_Cleavage/ Ab3lyp\_d2ps1.log  
 SM Alanine ammonium dimethyl allyl ylide  
 b3lyp/6-31+g\*\*  
 E(RB3LYP) = -637.054742510

|                                              |          |
|----------------------------------------------|----------|
| Zero-point correction=                       | 0.309431 |
| (Hartree/Particle)                           |          |
| Thermal correction to Energy=                | 0.326397 |
| Thermal correction to Enthalpy=              | 0.327341 |
| Thermal correction to Gibbs Free Energy=     | 0.265483 |
| Sum of electronic and zero-point Energies=   | -        |
| 636.745311                                   |          |
| Sum of electronic and thermal Energies=      | -        |
| 636.728346                                   |          |
| Sum of electronic and thermal Enthalpies=    | -        |
| 636.727402                                   |          |
| Sum of electronic and thermal Free Energies= | -        |
| 636.789260                                   |          |

|        | E (Thermal)<br>KCal/Mol | CV<br>Cal/Mol-Kelvin | S<br>Cal/Mol- |
|--------|-------------------------|----------------------|---------------|
| Kelvin |                         |                      |               |
| Total  | 204.817                 | 63.124               | 130.191       |

C,0,0.7503973531,-0.4733121616,-0.4453787405

C,0,2.1318469562,-0.9407591219,-0.1076912437  
 C,0,3.2843811244,-0.3267548752,-0.4343809345  
 C,0,3.3869605786,0.9760597734,-1.1839345861  
 C,0,4.6118493423,-0.9218399061,-0.0390324679  
 N,0,0.0289885937,0.2999389941,0.6884557427  
 C,0,0.8427313192,1.5122023897,1.0400427685  
 C,0,-1.3485546938,0.6997944273,0.2258757009  
 C,0,-1.4587041714,2.0570952452,-0.42231885  
 C,0,-2.2441240671,-0.3423021669,-0.0224220165  
 C,0,-0.0186275443,-0.5458867826,1.9365493365  
 H,0,4.4897314779,-1.8564353559,0.5176654141  
 H,0,5.2238662363,-1.1175752372,-0.9300014816  
 H,0,5.1767807272,-0.2120644294,0.580989555  
 H,0,4.0601319639,0.8621225465,-2.0433324321  
 H,0,2.4274498431,1.353308131,-1.542855851  
 H,0,3.8323755734,1.7416059292,-0.5335266446  
 H,0,2.1928729832,-1.8740784843,0.4486334364  
 H,0,0.727487572,0.2128494372,-1.2926828738  
 H,0,0.0876363181,-1.3160741382,-0.6439470937  
 H,0,0.9855371016,2.1257406023,0.1537546884  
 H,0,0.3039837063,2.0696661419,1.8063375204  
 H,0,1.8078670429,1.1722492022,1.4132542874  
 H,0,1.0060903669,-0.772818508,2.236506999  
 H,0,-0.5254678037,0.0410978972,2.7034178655  
 H,0,-0.580168279,-1.4483441119,1.710778516  
 H,0,-2.4762527901,2.1763230571,-0.7973497801  
 H,0,-1.260284765,2.8928045247,0.2615719055  
 H,0,-0.7798321168,2.1813406291,-1.2856733467  
 O,0,-2.1048649723,-1.5763066919,0.2035860696  
 O,0,-3.4501707154,0.0993812151,-0.5849043899  
 C,0,-4.4462004625,-0.9064304642,-0.782703749  
 H,0,-5.2995770478,-0.3890847375,-1.2285664463  
 H,0,-4.0912230294,-1.6936385886,-1.4569572451  
 H,0,-4.7431457215,-1.3654113819,0.1675223673

#### Cleavage A Product

SM\_Ylide\_Cleavage\_pdt/apps1.log

ub3lyp/6-31+g\*\*  
 E(UB3LYP) = -637.032309571

|                                              |          |
|----------------------------------------------|----------|
| Zero-point correction=                       | 0.301659 |
| (Hartree/Particle)                           |          |
| Thermal correction to Energy=                | 0.321232 |
| Thermal correction to Enthalpy=              | 0.322176 |
| Thermal correction to Gibbs Free Energy=     | 0.252304 |
| Sum of electronic and zero-point Energies=   | -        |
| 636.730651                                   |          |
| Sum of electronic and thermal Energies=      | -        |
| 636.711078                                   |          |
| Sum of electronic and thermal Enthalpies=    | -        |
| 636.710134                                   |          |
| Sum of electronic and thermal Free Energies= | -        |
| 636.780005                                   |          |

|        | E (Thermal)<br>KCal/Mol | CV<br>Cal/Mol-Kelvin | S<br>Cal/Mol- |
|--------|-------------------------|----------------------|---------------|
| Kelvin |                         |                      |               |
| Total  | 201.576                 | 67.836               | 147.057       |

C,0,0.7965536274,-0.7737096786,-0.802977391  
 C,0,2.0434101084,-1.0562752399,-0.2615785688  
 C,0,3.1976082271,-0.2737627921,-0.3309081377  
 C,0,3.2729331374,1.0329037146,-1.0680156413  
 C,0,4.4683278927,-0.7179542809,0.3353311074  
 N,0,-0.4207760186,0.7911234411,1.2544073424  
 C,0,0.6580310046,1.7728420202,1.2187088049  
 C,0,-1.6482771225,1.0889422373,0.7162269222  
 C,0,-1.8699969368,2.4767230654,0.1719137122  
 C,0,-2.615084735,0.0436312436,0.5005838827  
 C,0,-0.2200397985,-0.2103746453,2.3027370345  
 H,0,4.3445161276,-1.6761794076,0.8516328892  
 H,0,5.2821916673,-0.8211234411,-0.3992008855  
 H,0,4.809662916,0.0304010576,1.0672392749  
 H,0,4.0257365133,0.9774652389,-1.8688798304  
 H,0,2.3206086958,1.3289024728,-1.5144508764  
 H,0,3.5986597001,1.836968739,-0.3917028103  
 H,0,2.1333390298,-1.9831608276,0.3070104216  
 H,0,0.6056612879,0.1349348243,-1.3644790018  
 H,0,-0.0499380464,-1.426551871,-0.6214584821  
 H,0,0.6408932279,2.3387215352,0.2876833801  
 H,0,0.5898492674,2.4687706536,2.0687845438  
 H,0,1.6063243444,1.2315180637,1.2766466805  
 H,0,0.7400249098,-0.706782682,2.1304380783  
 H,0,-0.190071301,0.2924980481,3.2817482205  
 H,0,-1.0182983448,-0.9467430196,2.2835468625  
 H,0,-2.9306965642,2.6478056125,-0.0102566374  
 H,0,-1.3385507689,2.6300097002,-0.7799611363  
 H,0,-1.5055909784,3.2359697315,0.8730135476  
 O,0,-2.4548765837,-1.175998272,0.6855465918  
 O,0,-3.8144806891,0.5261821937,0.0251739017  
 C,0,-4.8187040762,-0.4627595298,-0.2456161426  
 H,0,-5.681133431,0.0928664635,-0.6181711674  
 H,0,-4.4678220629,-1.1745273007,-0.9998943894  
 H,0,-5.0811212269,-1.008311643,0.6666068997

C,0,0.9631906469,-0.7669448014,-0.8301175942  
 C,0,2.243089843,-1.1128395882,-0.3491918605  
 C,0,3.4020765477,-0.3735932901,-0.4560786194  
 C,0,3.5015020738,0.9318626831,-1.1944511423  
 C,0,4.6830665281,-0.8565337892,0.1637080209  
 N,0,-0.1508335904,0.4264048875,0.7650837899  
 C,0,0.8080438653,1.5285070138,0.922844939  
 C,0,-1.4124135741,0.7452089037,0.2655972281  
 C,0,-1.6305689415,2.1241554927,-0.3035465377  
 C,0,-2.3438251887,-0.3128805367,0.0272595597  
 C,0,-0.0430085067,-0.4987963153,1.9114805342  
 H,0,4.549337182,-1.8097406188,0.6862137326  
 H,0,5.4639190595,-0.9828673987,-0.6014989015  
 H,0,5.0718717042,-0.1164680781,0.8796213648  
 H,0,4.2621143666,0.8619440883,-1.9858173573  
 H,0,2.5584725297,1.2424185431,-1.6497018098  
 H,0,3.8331599799,1.7306112494,-0.5151297568  
 H,0,2.314667627,-2.0442872225,0.2129776622  
 H,0,0.8253395768,0.0768056326,-1.4969838853  
 H,0,0.1536061511,-1.4853071054,-0.7835246323  
 H,0,0.8557887955,2.1292190022,0.0161137047  
 H,0,0.521324172,2.1628136157,1.7723212687  
 H,0,1.7908248497,1.0910781753,1.1097977814  
 H,0,0.997344259,-0.823324952,1.9878626433  
 H,0,-0.3297637908,0.0363721654,2.8272530757  
 H,0,-0.692106823,-1.3554963091,1.7543393197  
 H,0,-2.6798889474,2.255489729,-0.5667979158  
 H,0,-1.3538990658,2.9085339786,0.4112029623  
 H,0,-1.0353173897,2.2946948606,-1.2154832061  
 O,0,-2.1619422922,-1.53483807,0.2019814739  
 O,0,-3.5549635499,0.1395339302,-0.4600445046  
 C,0,-4.5299138318,-0.8735163511,-0.7414405814  
 H,0,-5.4025551639,-0.3397744088,-1.1230392463  
 H,0,-4.1555887607,-1.5770768803,-1.4924123422  
 H,0,-4.7903783413,-1.4269022354,0.1668838327

### Cleavage A Transition State

SM\_Ylide\_Cleavage\_ts/atpcmps1.log  
 alanine prenyl TSfreq  
 UB3LYP/6-31+G\*\*  
 E(UB3LYP) = -637.029145424  
 Zero-point correction= 0.303912  
 (Hartree/Particle)  
 Thermal correction to Energy= 0.321624  
 Thermal correction to Enthalpy= 0.322568  
 Thermal correction to Gibbs Free Energy= 0.258533  
 Sum of electronic and zero-point Energies= -  
 636.725234  
 Sum of electronic and thermal Energies= -  
 636.707522  
 Sum of electronic and thermal Enthalpies= -  
 636.706577  
 Sum of electronic and thermal Free Energies= -  
 636.770613

|        | E (Thermal) | CV             | S        |
|--------|-------------|----------------|----------|
| Kelvin | KCal/Mol    | Cal/Mol-Kelvin | Cal/Mol- |
| Total  | 201.822     | 64.244         | 134.774  |

### Polyrate structures for C-N Bond Cleavage in 5: M06/6-31+G\*\*/PCM

#### Cleavage A Starting Material

SM\_Ylide\_Cleavage/alanineprenylcleavageAsmm06631pl  
 usgstarstarpcm  
 SM Alanine ammonium dimethyl allyl ylide  
 m06/6-31+g\*\*  
 E(RM06) = -636.552177221

Zero-point correction= 0.307731 (Hartree/Particle)  
 Thermal correction to Energy= 0.324900  
 Thermal correction to Enthalpy= 0.325844  
 Thermal correction to Gibbs Free Energy= 0.263370  
 Sum of electronic and ZPE= -636.244446  
 Sum of electronic and thermal Energies= -636.227278  
 Sum of electronic and thermal Enthalpies= -636.226334  
 Sum of electronic and thermal Free Energies= -636.288808

|       | E        | CV        | S         |
|-------|----------|-----------|-----------|
| Total | KCal/Mol | Cal/Mol-K | Cal/Mol-K |
| Total | 203.878  | 63.675    | 131.488   |

C,0,0.7641437801,-0.4285014282,-0.3859347284

C,0,2.1398391687,-0.8830888352,-0.0470216589  
 C,0,3.2921094585,-0.3282488124,-0.4621019477  
 C,0,3.402935776,0.8999492819,-1.3109025326  
 C,0,4.6090237697,-0.9277538359,-0.0763220584  
 N,0,0.0170227086,0.3155082372,0.7368587957  
 C,0,0.7983279105,1.5223538666,1.1335556993  
 C,0,-1.3533878461,0.7138264852,0.254724314  
 C,0,-1.4762296033,2.0694122866,-0.3723805035  
 C,0,-2.2244366078,-0.3390777407,-0.0318141852  
 C,0,-0.0602232182,-0.5460312771,1.9622279655  
 H,0,4.4919126528,-1.8027004,0.5706453704  
 H,0,5.1730926289,-1.229140955,-0.9691793213  
 H,0,5.2308361026,-0.1884744886,0.4465664096  
 H,0,4.0497122667,0.7063313039,-2.1762457859  
 H,0,2.446333838,1.2781598103,-1.6814720258  
 H,0,3.8845777952,1.705760805,-0.7393462909  
 H,0,2.2073771778,-1.7836821583,0.566739743  
 H,0,0.7407044887,0.2618194447,-1.2345278378  
 H,0,0.1099647161,-1.2767052668,-0.6107284765  
 H,0,0.9469567734,2.175847612,0.2737866807  
 H,0,0.2436070312,2.0511024018,1.9116668746  
 H,0,1.7675626672,1.1981042481,1.5169475917  
 H,0,0.9528961633,-0.756670065,2.31362182  
 H,0,-0.6139506554,0.0133745945,2.7193277954  
 H,0,-0.5929739276,-1.46149572,1.7096674214  
 H,0,-2.4924711253,2.1686851143,-0.7594124829  
 H,0,-1.3185846778,2.9078602176,0.3197281901  
 H,0,-0.7991735268,2.2314391798,-1.2318008532  
 O,0,-2.0693419516,-1.5651988174,0.1698724665  
 O,0,-3.4164334533,0.0936424632,-0.6010234716  
 C,0,-4.380686283,-0.9126869227,-0.8462576843  
 H,0,-5.2378440717,-0.4053471738,-1.2954342269  
 H,0,-4.0057158656,-1.6765265651,-1.5368300311  
 H,0,-4.6957160606,-1.4073838903,0.0800809651

### Cleavage A Product

SM\_Ylide\_Cleavage\_pdt/alanineprenylcleavageApdpm066  
 31plusgstarstarpem  
 Pdt Alanine ammonium dimethyl allyl ylide  
 um06/6-31+g\*\*  
 E(UM06) = -636.530381159  
 Zero-point correction= 0.300024 (Hartree/Particle)  
 Thermal correction to Energy= 0.320057  
 Thermal correction to Enthalpy= 0.321002  
 Thermal correction to Gibbs Free Energy= 0.248323  
 Sum of electronic and zero-point Energies= -636.230357  
 Sum of electronic and thermal Energies= -636.210324  
 Sum of electronic and thermal Enthalpies= -636.209379  
 Sum of electronic and thermal Free Energies= -636.282058

|                 | E (Thermal)<br>KCal/Mol | CV<br>Cal/Mol-Kelvin | S<br>Cal/Mol- |
|-----------------|-------------------------|----------------------|---------------|
| Kelvin<br>Total | 200.839                 | 68.482               | 152.965       |
| C               | 0.788524                | -0.745480            | -0.756150     |
| C               | 2.061067                | -1.027741            | -0.293953     |
| C               | 3.220938                | -0.274400            | -0.477519     |

C 3.260697 1.002263 -1.249789  
 C 4.520815 -0.716409 0.108370  
 N -0.541974 0.880252 1.552228  
 C 0.598875 1.773010 1.514043  
 C -1.662397 1.120586 0.804809  
 C -1.808527 2.454129 -0.146953  
 C -2.589271 0.054839 0.543054  
 C -0.450537 -0.133977 2.587437  
 H 4.424260 -1.647140 0.677644  
 H 5.277540 -0.871881 -0.675725  
 H 4.935304 0.052917 0.777692  
 H 4.012925 0.949022 -2.050284  
 H 2.301775 1.266106 -0.1705532  
 H 3.565151 1.837621 -0.600697  
 H 2.177774 -1.941478 0.296263  
 H 0.566841 0.141446 -1.348632  
 H -0.049132 -1.397265 -0.520387  
 H 0.665479 2.293628 0.556831  
 H 0.559573 2.515942 2.325595  
 H 1.513865 1.178831 1.633819  
 H 0.200106 -0.961819 2.271682  
 H -0.017900 0.323471 3.487132  
 H -1.432875 -0.536876 2.826393  
 H -2.843246 2.615646 -0.158192  
 H -1.187072 2.543777 -0.758142  
 H -1.518009 3.267539 0.822033  
 O -2.455259 -1.135945 0.845844  
 O -3.702852 0.487903 -0.123075  
 C -4.656144 -0.516411 -0.441686  
 H -5.462678 -0.007872 -0.972162  
 H -4.217089 -1.288009 -1.082612  
 H -5.047672 -0.990955 0.464146

### Cleavage A Transition State

SM\_Ylide\_Cleavage\_ts/alanineprenylcleavageAtsm06631p  
 lusgstarstarpem  
 alanine prenyl TSfreq  
 UM06/6-31+G\*\*  
 E(UM06) = -636.521890517

Zero-point correction= 0.302763 (Hartree/Particle)  
 Thermal correction to Energy= 0.320520  
 Thermal correction to Enthalpy= 0.321464  
 Thermal correction to Gibbs Free Energy= 0.257307  
 Sum of electronic and ZPE= -636.219128  
 Sum of electronic and thermal Energies= -636.201371  
 Sum of electronic and thermal Enthalpies= -636.200426  
 Sum of electronic and thermal Free Energies= -636.264583

| E        | CV        | S              |
|----------|-----------|----------------|
| KCal/Mol | Cal/Mol-K | Cal/Mol-K      |
| Total    | 201.129   | 64.591 135.030 |

C,0,0.9741155078,-0.7469290698,-0.7177303483  
 C,0,2.2791967219,-1.0719821452,-0.2881627843  
 C,0,3.4267470259,-0.3456381407,-0.4895988684  
 C,0,3.4897464075,0.9178207493,-1.2836977437  
 C,0,4.7315548061,-0.8040648496,0.0740545055  
 N,0,-0.1601997931,0.3838372892,0.8048811019  
 C,0,0.7653604066,1.4890784249,1.0539571805

C,0,-1.4033411981,0.7279340447,0.2669416445  
 C,0,-1.5606560918,2.0786263997,-0.3593437142  
 C,0,-2.3530675192,-0.30896855,0.0256183634  
 C,0,-0.1267441106,-0.5435159444,1.9465420205  
 H,0,4.6310555966,-1.7263818215,0.655488188  
 H,0,5.466401604,-0.9784266506,-0.7256588603  
 H,0,5.1704411795,-0.0325589567,0.7240424625  
 H,0,4.2396520305,0.8299078873,-2.0826168561  
 H,0,2.5371287101,1.1961673451,-1.7433307199  
 H,0,3.8170868421,1.7556380703,-0.6501633722  
 H,0,2.3813130279,-1.9870170523,0.3016289396  
 H,0,0.8061886283,0.0614898526,-1.4276494708  
 H,0,0.1949577306,-1.5034626792,-0.6800478352  
 H,0,0.8714974869,2.1219856016,0.1718719193  
 H,0,0.4135937831,2.0984373106,1.8987530488  
 H,0,1.7452760435,1.070004167,1.3020379074  
 H,0,0.9091060579,-0.8540524775,2.1125633239  
 H,0,-0.4952970059,-0.0231538456,2.8419929801  
 H,0,-0.7479976215,-1.4127627629,1.7410343499  
 H,0,-2.5848670957,2.2048775709,-0.7114616087  
 H,0,-1.3456999928,2.8992733582,0.3371041829  
 H,0,-0.9007118779,2.2188685139,-1.2325997998  
 O,0,-2.2149093042,-1.5251625123,0.2234967309  
 O,0,-3.5326386272,0.1674687039,-0.4899637305  
 C,0,-4.523876527,-0.8109727057,-0.7637677308  
 H,0,-5.3771540481,-0.2674208928,-1.1734007666  
 H,0,-4.1670558613,-1.5457735419,-1.4932789167  
 H,0,-4.8244309226,-1.3387046904,0.1477472769

## Polyrate structures for C-N Bond Cleavage in 5: M062X/6-31+G\*\*/PCM

### Cleavage A Starting Material

SM\_Ylide\_Cleavage/alanineprenylcleavageAsmm062x631  
 plusgstarstarpem  
 SM Alanine ammonium dimethyl allyl ylide  
 m062x/6-31+g\*\*  
 E(RM062X) = -636.698102848

Zero-point correction= 0.313086 (Hartree/Particle)  
 Thermal correction to Energy= 0.330026  
 Thermal correction to Enthalpy= 0.330970  
 Thermal correction to Gibbs Free Energy= 0.269062  
 Sum of electronic and ZPE= -636.385017  
 Sum of electronic and thermal Energies= -636.368077  
 Sum of electronic and thermal Enthalpies= -636.367132  
 Sum of electronic and thermal Free Energies= -636.429041

| E             | CV        | S         |
|---------------|-----------|-----------|
| KCal/Mol      | Cal/Mol-K | Cal/Mol-K |
| Total 207.095 | 62.664    | 130.297   |

C,0,0.747521742,-0.4348997736,-0.4459999366  
 C,0,2.1199326319,-0.9234106488,-0.0966483499  
 C,0,3.2828206896,-0.3435762732,-0.4342826248  
 C,0,3.4163136471,0.94722555,-1.196758635  
 C,0,4.5944713013,-0.967449975,-0.0380639789  
 N,0,0.0299085751,0.3214789156,0.6782479157  
 C,0,0.8220653817,1.5364845074,1.0391098485  
 C,0,-1.3435003748,0.7119328852,0.2167639684

C,0,-1.4983005814,2.0767387566,-0.3950363102  
 C,0,-2.2229131309,-0.3369760684,-0.031796017  
 C,0,-0.0179574247,-0.5259582848,1.9174031375  
 H,0,4.4517330212,-1.8817954013,0.5416487751  
 H,0,5.1876569301,-1.2050992022,-0.928106092  
 H,0,5.1854025074,-0.262532433,0.5577313788  
 H,0,4.1112238766,0.8175383517,-2.0329587824  
 H,0,2.473267283,1.3262502146,-1.5919621845  
 H,0,3.8457686123,1.7176840449,-0.5448947182  
 H,0,2.161943132,-1.8576512481,0.4609885768  
 H,0,0.744437131,0.2548607312,-1.2916569835  
 H,0,0.0814803908,-1.2701038839,-0.6683566284  
 H,0,0.9447621429,2.1717750266,0.1644593621  
 H,0,0.2846452423,2.0734104665,1.8205153879  
 H,0,1.796992087,1.2133349181,1.4015924091  
 H,0,1.0034117477,-0.7049287849,2.2549961671  
 H,0,-0.5750447091,0.032887484,2.6687743025  
 H,0,-0.5281746495,-1.4547620406,1.6813486299  
 H,0,-2.5244690605,2.1648113033,-0.7507335082  
 H,0,-1.3261760684,2.9029704653,0.3037878579  
 H,0,-0.8442289952,2.2463914107,-1.2663325571  
 O,0,-2.0630867092,-1.5647256606,0.1830790882  
 O,0,-3.4283461653,0.0843015225,-0.5807295713  
 C,0,-4.3992360489,-0.931796737,-0.777148801  
 H,0,-5.2637169063,-0.4336675156,-1.2172750323  
 H,0,-4.0339266195,-1.7080365932,-1.4544166211  
 H,0,-4.6849106292,-1.3982400301,0.1699935271

### Cleavage A Product

SM\_Ylide\_Cleavage\_pdt/alanineprenylcleavageApdtm062  
 x631plusgstarstarpem  
 Pdt Alanine ammonium dimethyl allyl ylide  
 um062x/6-31+g\*\*  
 E(UM062X) = -636.665411694  
 Zero-point correction= 0.304695  
 (Hartree/Particle)  
 Thermal correction to Energy= 0.324605  
 Thermal correction to Enthalpy= 0.325549  
 Thermal correction to Gibbs Free Energy= 0.253918  
 Sum of electronic and zero-point Energies= -  
 636.360717  
 Sum of electronic and thermal Energies= -  
 636.340807  
 Sum of electronic and thermal Enthalpies= -  
 636.339863  
 Sum of electronic and thermal Free Energies= -  
 636.411493

|        | E (Thermal)<br>KCal/Mol | CV<br>Cal/Mol-Kelvin | S<br>Cal/Mol- |
|--------|-------------------------|----------------------|---------------|
| Kelvin |                         |                      |               |
| Total  | 203.692                 | 67.834               | 150.759       |
| C      | 0.000000                | 0.000000             | 0.000000      |
| C      | 0.000000                | 0.000000             | 1.384626      |
| C      | 1.107222                | 0.000000             | 2.232264      |
| C      | 0.934996                | 0.016486             | 3.721017      |
| C      | 2.523045                | -0.015710            | 1.741828      |
| N      | 0.112607                | 3.070949             | -0.553587     |
| C      | -1.065275               | 3.425594             | 0.224545      |
| C      | 1.353934                | 3.088724             | 0.204125      |
| C      | 0.095620                | 2.788570             | -1.885595     |

C -1.115142 2.345301 -2.513740  
O -0.981794 2.208761 -3.869932  
C -2.141799 1.744720 -4.552442  
C 1.389919 2.837266 -2.646576  
O -2.188741 2.081594 -1.956820  
H -0.118778 0.020803 4.010027  
H 1.415856 -0.856815 4.181092  
H 1.416698 0.900487 4.159786  
H 3.049108 -0.902243 2.118576  
H 2.601417 -0.012800 0.653619  
H 3.070192 0.856177 2.124207  
H -0.974415 0.015563 1.874278  
H 0.915284 -0.006662 -0.582869  
H -0.931819 0.046698 -0.551570  
H 2.118310 2.485686 -0.284416  
H 1.726456 4.112909 0.333497  
H 1.161670 2.656567 1.191344  
H -1.453438 2.554104 0.764676  
H -0.771503 4.190256 0.949950  
H -1.845893 3.818688 -0.421314  
H 1.190855 2.939197 -3.711964  
H 1.984064 1.923800 -2.507899  
H 2.002139 3.683773 -2.323401  
H -1.861570 1.682637 -5.603045  
H -2.442180 0.761169 -4.183426  
H -2.972998 2.442409 -4.424861

### Cleavage A Transition State

SM\_Ylide\_Cleavage\_ts/alanineprenylcleavageAtsm062x63  
lplusgstarstarp  
alanine prenyl TSfreq  
UM062X/6-31+G\*\*  
E(UM062X) = -636.657111959

Zero-point correction= 0.307282 (Hartree/Particle)  
Thermal correction to Energy= 0.324985  
Thermal correction to Enthalpy= 0.325929  
Thermal correction to Gibbs Free Energy= 0.261888  
Sum of electronic and ZPE= -636.349830  
Sum of electronic and thermal Energies= -636.332127  
Sum of electronic and thermal Enthalpies= -636.331183  
Sum of electronic and thermal Free Energies= -636.395224

| E             | CV        | S         |
|---------------|-----------|-----------|
| KCal/Mol      | Cal/Mol-K | Cal/Mol-K |
| Total 203.931 | 64.003    | 134.785   |

C,0,0.9543247591,-0.725193676,-0.7985209082  
C,0,2.2417647169,-1.0959935489,-0.345422005  
C,0,3.405594593,-0.3775053144,-0.4666751392  
C,0,3.5094320564,0.9350483123,-1.1875999658  
C,0,4.6907614796,-0.8870857039,0.1179598918  
N,0,-0.1580602163,0.433757153,0.7803333779  
C,0,0.7804298115,1.5437451598,0.9652002873  
C,0,-1.4034079941,0.7470558766,0.2618557626  
C,0,-1.6188507022,2.1060497398,-0.3436082712  
C,0,-2.3396172335,-0.3111101802,0.0367348371  
C,0,-0.0625103828,-0.4985533267,1.9156894381  
H,0,4.5534793543,-1.8390584129,0.6363257775  
H,0,5.4476686979,-1.0242498686,-0.6649883528

H,0,5.1086786567,-0.1623884899,0.8287261739  
H,0,4.2765045956,0.8779543127,-1.969760586  
H,0,2.573224774,1.2479178361,-1.652230176  
H,0,3.8278799665,1.7270720369,-0.4972140885  
H,0,2.307866518,-2.0389565474,0.1981835458  
H,0,0.8170632552,0.1167352926,-1.4696175614  
H,0,0.1482507234,-1.4499394599,-0.7706636672  
H,0,0.8451911036,2.1499311653,0.0632705044  
H,0,0.4654438008,2.1714446755,1.8079100266  
H,0,1.7638049719,1.1207344214,1.1792225879  
H,0,0.9842624246,-0.7857430061,2.0307788319  
H,0,-0.4012825715,0.0139703227,2.8243638774  
H,0,-0.6724498222,-1.3761306693,1.7305719638  
H,0,-2.6625258642,2.2142122198,-0.6313224424  
H,0,-1.3731998442,2.9126211085,0.3542611557  
H,0,-1.0105183232,2.25878654,-1.2472643383  
O,0,-2.1667846388,-1.5223143436,0.2343204054  
O,0,-3.5325876597,0.1348383669,-0.4661820275  
C,0,-4.5016805297,-0.8739251451,-0.7306816716  
H,0,-5.3687302715,-0.351349328,-1.1325365018  
H,0,-4.1245289247,-1.5947165153,-1.4600216768  
H,0,-4.7731192805,-1.4031950036,0.1858839344

## Polyrate structures for rearrangement of 2: M06/6-31+G\*\*/PCM(DMF)

### 23 Starting Material

/g/home/biswas85/parentdmfm06/sm/g09.log  
sm for 23 from opt of ts  
M06/6-31+G\*\*  
E(RM06) = -518.694746359

Zero-point correction= 0.223875 (Hartree/Particle)  
Thermal correction to Energy= 0.236917  
Thermal correction to Enthalpy= 0.237861  
Thermal correction to Gibbs Free Energy= 0.184158  
Sum of electronic and ZPE= -518.470871  
Sum of electronic and thermal Energies= -518.457829  
Sum of electronic and thermal Enthalpies= -518.456885  
Sum of electronic and thermal Free Energies= -518.510589

| E             | CV        | S         |
|---------------|-----------|-----------|
| KCal/Mol      | Cal/Mol-K | Cal/Mol-K |
| Total 148.668 | 47.606    | 113.029   |

C,0,1.1333071034,-0.1218041045,2.2064736122  
C,0,0.0000933671,0.0326690312,1.5220872205  
C,0,-0.047768062,-0.0071633904,0.0354155882  
N,0,-0.131398525,1.3843791958,-0.6153483973  
C,0,1.0395596613,2.2399093241,-0.3350302844  
C,0,2.3088823221,1.7771417278,-0.6612243047  
O,0,3.2972129854,2.610343799,-0.164251276  
C,0,4.628824054,2.248251984,-0.484027493  
C,0,-1.3491782563,2.08477429,-0.1201183413  
C,0,-0.2967356606,1.171366675,-2.090028071  
O,0,2.6238708087,0.7659426221,-1.3222093789  
H,0,0.8595729485,-0.4516936169,-0.3840109545  
H,0,-0.9233939406,-0.5621344851,-0.3228546894  
H,0,-0.9412142358,0.1729148895,2.0547282923  
H,0,1.1511140466,-0.1082158632,3.2932473258



H,0,2.08387299,-0.274037335,1.6953626709  
 H,0,-1.2453061905,2.2752581971,0.9495823324  
 H,0,-2.224802973,1.4584105434,-0.309859651  
 H,0,-1.436868616,3.0343601354,-0.6523079255  
 H,0,-1.1789549197,0.5493744809,-2.2689146993  
 H,0,-0.4165303885,2.150844872,-2.556360578  
 H,0,0.6051424569,0.6844316774,-2.4629264389  
 H,0,4.8903416346,1.2661848778,-0.0731431755  
 H,0,5.2666192138,3.0118431856,-0.0333408849  
 H,0,4.7938065027,2.2276111707,-1.5673607619  
 H,0,0.8771776727,2.9881461163,0.4300172631

### 23 Product

/g/home/biswas85/parentdmfm06/p/g09.log  
 23 product  
 M06/6-31+G\*\*  
 E(RM06) = -518.742159479

Zero-point correction= 0.223726 (Hartree/Particle)  
 Thermal correction to Energy= 0.236854  
 Thermal correction to Enthalpy= 0.237798  
 Thermal correction to Gibbs Free Energy= 0.184675  
 Sum of electronic and ZPE= -518.518434  
 Sum of electronic and thermal Energies= -518.505305  
 Sum of electronic and thermal Enthalpies= -518.504361  
 Sum of electronic and thermal Free Energies= -518.557485

| E             | CV        | S         |
|---------------|-----------|-----------|
| KCal/Mol      | Cal/Mol-K | Cal/Mol-K |
| Total 148.628 | 47.081    | 111.808   |

C,0,0.248569026,0.1136980282,1.9585947295  
 C,0,0.5810526322,0.5139119792,0.5516588156  
 C,0,1.4829518537,-0.1172518565,-0.2011163179  
 N,0,-0.3509756572,2.094078552,3.3886020017  
 C,0,-0.916195782,2.8743330853,2.3009523105  
 C,0,0.6685419158,1.1187845757,3.0588438653  
 C,0,2.0285207211,1.6953505816,2.6839142054  
 O,0,2.2438670974,2.8169540825,2.2745605061  
 C,0,0.0017425704,2.9199325248,4.5294745891  
 O,0,2.9835199911,0.7685342633,2.8363855663  
 C,0,4.2950980678,1.1320048808,2.3921779129  
 H,0,2.031522176,-0.980237549,0.1776748281  
 H,0,1.7031314895,0.2007895908,-1.2172548827  
 H,0,0.0630272084,1.3794490129,0.1341369413  
 H,0,-0.8311290668,-0.0524686401,2.0776067804  
 H,0,0.7451077383,-0.8406958306,2.1717226977  
 H,0,0.3679930227,2.2869759032,5.34679906  
 H,0,-0.8904302817,3.4479418329,4.8860854284  
 H,0,0.7753996489,3.6750730397,4.3027152484  
 H,0,-1.7282384913,3.4898721524,2.7047200069  
 H,0,-0.1894061859,3.5442503473,1.8109286735  
 H,0,-1.3588969668,2.2186549574,1.5441576919  
 H,0,4.2774158229,1.3708354706,1.3243197181  
 H,0,4.9257013509,0.2625659108,2.5754419505  
 H,0,4.665355605,1.994536644,2.9526588523  
 H,0,0.8359234937,0.5278064607,3.9721138207

### 23 Transition State

/g/home/biswas85/parentdmfm06/ts/g09.log  
 glycine allyl TSfreq  
 M06/6-31+G\*\*  
 E(RM06) = -518.672174429

Zero-point correction= 0.220896 (Hartree/Particle)  
 Thermal correction to Energy= 0.233692  
 Thermal correction to Enthalpy= 0.234636  
 Thermal correction to Gibbs Free Energy= 0.182582  
 Sum of electronic and ZPE= -518.451279  
 Sum of electronic and thermal Energies= -518.438483  
 Sum of electronic and thermal Enthalpies= -518.437539  
 Sum of electronic and thermal Free Energies= -518.489593

| E             | CV        | S         |
|---------------|-----------|-----------|
| KCal/Mol      | Cal/Mol-K | Cal/Mol-K |
| Total 146.644 | 47.372    | 109.557   |

C,0,1.1208611714,-0.0012050587,2.1125085329  
 C,0,-0.1136273499,-0.2699158874,1.583957285  
 C,0,-0.3554501247,-0.0432927865,0.2254035237  
 N,0,-0.2145010566,2.0936215391,0.285248748  
 C,0,0.7811094194,2.4599781681,1.1635019884  
 C,0,2.1687937195,2.4265017896,0.8465109637  
 O,0,2.9104516828,2.9412969162,1.8715621034  
 C,0,4.3210402146,2.8385615063,1.7252096105  
 C,0,-1.5492321603,2.4601461294,0.7736762782  
 C,0,-0.0607426848,2.4096405313,-1.1429723496  
 O,0,2.7071323417,1.9863243866,-0.1723725164  
 H,0,0.4778537571,-0.0945258587,-0.4744652149  
 H,0,-1.3442334769,-0.1937334883,-0.2048344085  
 H,0,-0.9648707932,-0.3941218825,2.2551627538  
 H,0,1.2950406927,0.0104094622,3.1859679052  
 H,0,2.001846206,0.0291700209,1.4746665458  
 H,0,-1.6902623575,2.0613683712,-1.782007574  
 H,0,-2.3089365272,2.0395412735,0.109954053  
 H,0,-1.6520779981,3.5531027327,0.7990406872  
 H,0,-0.8402921118,1.8839539589,-1.7024796709  
 H,0,-0.1727722291,3.4917198855,-1.2934349281  
 H,0,0.9239864679,2.0932252987,-1.4854614339  
 H,0,4.6303283239,1.7909198975,1.6392737064  
 H,0,4.7501679912,3.2779259748,2.6268805815  
 H,0,4.6701219697,3.3848655609,0.8431640978  
 H,0,0.4788829119,2.8076695588,2.1446875837

### Polyrate structures for rearrangement of 2: M062X/6-31+G\*\*/PCM(DMF)

#### 23 Starting Material

/g/home/biswas85/parentdmfm062x/sm/g09.log  
 sm for 23 from opt of ts  
 M062X/6-31+G\*\*  
 E(RM062X) = -518.806416442

Zero-point correction= 0.227816 (Hartree/Particle)  
 Thermal correction to Energy= 0.240698  
 Thermal correction to Enthalpy= 0.241642  
 Thermal correction to Gibbs Free Energy= 0.188327  
 Sum of electronic and ZPE= -518.578601

Sum of electronic and thermal Energies= -518.565718  
 Sum of electronic and thermal Enthalpies= -518.564774  
 Sum of electronic and thermal Free Energies= -518.618090

E CV S  
 KCal/Mol Cal/Mol-K Cal/Mol-K  
 Total 151.040 46.846 112.212

C,0,1.1269700984,-0.0927661204,2.1998380003  
 C,0,-0.0129008803,0.0125338672,1.5175752732  
 C,0,-0.0474883799,-0.0139001263,0.0217496431  
 N,0,-0.130397807,1.3815076267,-0.6083299145  
 C,0,1.0402761819,2.2251171138,-0.3064318215  
 C,0,2.3061181091,1.7665970479,-0.6273198589  
 O,0,3.3019343985,2.6117448535,-0.1653461172  
 C,0,4.6299404757,2.2359724569,-0.5004037323  
 C,0,-1.3514869522,2.0757612902,-0.1048728894  
 C,0,-0.2819664972,1.1879828851,-2.0893205159  
 O,0,2.6202448181,0.7321195871,-1.2614781342  
 H,0,0.865124861,-0.4474256871,-0.3888032588  
 H,0,-0.9175385479,-0.5654183413,-0.345174927  
 H,0,-0.9598725925,0.1034004429,2.04542985  
 H,0,1.1427029289,-0.0861498449,3.2852017015  
 H,0,2.0793006265,-0.1905753062,1.6828505618  
 H,0,-1.2443265185,2.2440897797,0.9659222639  
 H,0,-2.2223069758,1.451383924,-0.3082977721  
 H,0,-1.4356258969,3.0309022681,-0.6227101229  
 H,0,-1.1599319664,0.5679842643,-2.2807280317  
 H,0,-0.398897612,2.1720384785,-2.5405527157  
 H,0,0.6238601914,0.7067678981,-2.45347295  
 H,0,4.8865725466,1.2615621939,-0.0761469306  
 H,0,5.2729916426,3.0053859662,-0.0726067502  
 H,0,4.7705520983,2.1963548627,-1.5840976165  
 H,0,0.8633976499,3.0361386192,0.3811237656

### 23 Product

/g/home/biswas85/parentdmfm062x/p/g09.log  
 23 product  
 M062X/6-31+G\*\*  
 E(RM062X) = -518.851309696

Zero-point correction= 0.227403 (Hartree/Particle)  
 Thermal correction to Energy= 0.240398  
 Thermal correction to Enthalpy= 0.241342  
 Thermal correction to Gibbs Free Energy= 0.188355  
 Sum of electronic and ZPE= -518.623907  
 Sum of electronic and thermal Energies= -518.610912  
 Sum of electronic and thermal Enthalpies= -518.609967  
 Sum of electronic and thermal Free Energies= -518.662954

E CV S  
 KCal/Mol Cal/Mol-K Cal/Mol-K  
 Total 150.852 46.437 111.520

C,0,0.2296425962,0.1020687292,1.9668478427  
 C,0,0.5907750045,0.5243331986,0.565772539  
 C,0,1.5554705386,-0.0573767365,-0.1486883418  
 N,0,-0.3749900539,2.0828218482,3.4010598736  
 C,0,-0.8988159124,2.8625203808,2.285368259  
 C,0,0.6445902369,1.1004877434,3.0830345889

C,0,2.0107571184,1.6785164431,2.7104668553  
 O,0,2.2324637013,2.8175059376,2.3599329444  
 C,0,-0.0063993852,2.9257444314,4.5318839158  
 O,0,2.9572061051,0.735249234,2.7865595158  
 C,0,4.2628239655,1.1153961192,2.3335295749  
 H,0,2.1299130182,-0.8896672003,0.2528152446  
 H,0,1.7986930697,0.2782469706,-1.15204944  
 H,0,0.0470001625,1.3605850866,0.1298552668  
 H,0,-0.8501343369,-0.0556355602,2.0658316226  
 H,0,0.7230128483,-0.8510680536,2.1756191971  
 H,0,0.3357397267,2.2963081181,5.3590029712  
 H,0,-0.8882415714,3.4786140709,4.8673817744  
 H,0,0.786853976,3.6499042275,4.291105698  
 H,0,-1.6780779637,3.5257379674,2.6704993707  
 H,0,-0.1361815918,3.4756046751,1.7835547196  
 H,0,-1.3684646599,2.202609606,1.5522652973  
 H,0,4.2183854803,1.4120907916,1.2834182847  
 H,0,4.8865462295,0.2326996962,2.4556848845  
 H,0,4.6455458043,1.9422884459,2.9340047246  
 H,0,0.8050548933,0.5100938292,3.9931179445

### 23 Transition State

/g/home/biswas85/parentdmfm062x/ts/g09.log  
 glycine allyl TSfreq  
 M062X/6-31+G\*\*  
 E(RM062X) = -518.778941294

Zero-point correction= 0.225591 (Hartree/Particle)  
 Thermal correction to Energy= 0.237921  
 Thermal correction to Enthalpy= 0.238865  
 Thermal correction to Gibbs Free Energy= 0.187954  
 Sum of electronic and ZPE= -518.553350  
 Sum of electronic and thermal Energies= -518.541021  
 Sum of electronic and thermal Enthalpies= -518.540076  
 Sum of electronic and thermal Free Energies= -518.590988

E CV S  
 KCal/Mol Cal/Mol-K Cal/Mol-K  
 Total 149.297 45.928 107.152

C,0,1.0484463717,0.0846688271,2.1132030365  
 C,0,-0.1614101495,-0.2705747472,1.5631550875  
 C,0,-0.3432959294,0.0074895744,0.1999510948  
 N,0,-0.2054615318,2.0278568246,0.2999088228  
 C,0,0.7865572134,2.3597890321,1.2112700485  
 C,0,2.1728387466,2.3656063811,0.8720067357  
 O,0,2.9221821971,2.9288160568,1.8606939005  
 C,0,4.3350319755,2.8658711801,1.6763663018  
 C,0,-1.5377715433,2.4131060033,0.7965743704  
 C,0,-0.0334413512,2.4102371604,-1.1151786067  
 O,0,2.703664216,1.8865099367,-0.1322570412  
 H,0,0.5204906799,-0.0616541795,-0.4589825337  
 H,0,-1.3062367022,-0.1505056361,-0.2805148502  
 H,0,-1.0325621222,-0.3953812359,2.202425432  
 H,0,1.1947828465,0.1228165415,3.1892115398  
 H,0,1.9486300614,0.0549147309,1.5059560129  
 H,0,-1.6870080919,1.9720379731,1.7833393342  
 H,0,-2.2992672025,2.0402242754,0.1106424521  
 H,0,-1.6057018553,3.5032650623,0.8678237248  
 H,0,-0.8167434569,1.920250442,-1.6971625777

H,0,-0.1287442173,3.4961346546,-1.215509852  
 H,0,0.9454032707,2.0895274085,-1.4610260274  
 H,0,4.669196238,1.8280426814,1.6060366101  
 H,0,4.7687044122,3.3417313268,2.5544406899

H,0,4.6326640346,3.4009332869,0.7719360636  
 H,0,0.4796698898,2.8014344387,2.1480542311

## References, and Complete Reference 5b:

1. Rahal, S.; Badache, L. *Tetrahedron Lett.* **1991**, *32*, 3847-3848.
2. Babayan, L. A.; Grigoryan, D. V.; Kocharyan, S. T. *Hayastani Kimiakan Handes* **2002**, *55*, 129-133.
3. Coldham, I.; Middleton, M. L.; Taylor, P. L. *J. Chem. Soc. Perkin Trans. 1* **1997**, 2951-2952.
4. The rearrangement of compound **1** was achieved using methods outlined in Coldham, I.; Middleton, M. L.; Taylor, P. L. *J. Chem. Soc. Perkin Trans. 1* **1997**, 2951-2952. with slight variation to accommodate isotope effect measurements and the use of preformed **1** as starting material, as well as to prevent negative effects on the reaction by the presence of water.
5. Burkard, O.; Kahovec, L. *Monatsh. Chem.* **1937**, *71*, 333-345.
6. Jemison, R. W.; Laird, T.; Ollis, W. D.; Sutherland, I. O. *Perkin Trans. 1* **1980**, 1450-1457.
7. Vassilikogiannakis, G.; Chronakis, N.; Orfanopoulos, M. *J. Am. Chem. Soc.* **1998**, *120*, 9911-9920.
8. Davisson, V. J.; Woodside, A. B.; Neal, T. R.; Stremmer, K. E.; Muehlbacher, M.; Poulter, C. D. *J. Org. Chem.* **1986**, *51*, 4768-4779.
9. Alexander Hill, E.; Boyd, W. A.; Desai, H.; Darki, A.; Bivens, L. *J. Organomet. Chem.* **1996**, *514*, 1-11.
10. Svendsen, J. S.; Sydnes, L. K.; Whist, J. E. *Org. Mass Spectrom.* **1987**, *22*, 421-429.
11. Gaussian 09, Revision A.02, Frisch, M. J.; Trucks, G. W.; Schlegel, H. B.; Scuseria, G. E.; Robb, M. A.; Cheeseman, J. R.; Scalmani, G.; Barone, V.; Mennucci, B.; Petersson, G. A.; Nakatsuji, H.; Caricato, M.; Li, X.; Hratchian, H. P.; Izmaylov, A. F.; Bloino, J.; Zheng, G.; Sonnenberg, J. L.; Hada, M.; Ehara, M.; Toyota, K.; Fukuda, R.; Hasegawa, J.; Ishida, M.; Nakajima, T.; Honda, Y.; Kitao, O.; Nakai, H.; Vreven, T.; Montgomery, Jr., J. A.; Peralta, J. E.; Ogliaro, F.; Bearpark, M.; Heyd, J. J.; Brothers, E.; Kudin, K. N.; Staroverov, V. N.; Kobayashi, R.; Normand, J.; Raghavachari, K.; Rendell, A.; Burant, J. C.; Iyengar, S. S.; Tomasi, J.; Cossi, M.; Rega, N.; Millam, N. J.; Klene, M.; Knox, J. E.; Cross, J. B.; Bakken, V.; Adamo, C.; Jaramillo, J.; Gomperts, R.; Stratmann, R. E.; Yazyev, O.; Austin, A. J.; Cammi, R.; Pomelli, C.; Ochterski, J. W.; Martin, R. L.; Morokuma, K.; Zakrzewski, V. G.; Voth, G. A.; Salvador, P.; Dannenberg, J. J.; Dapprich, S.; Daniels, A. D.; Farkas, Ö.; Foresman, J. B.; Ortiz, J. V.; Cioslowski, J.; Fox, D. J. Gaussian, Inc., Wallingford CT, 2009.
12. Gaussian 09, Revision B.01, Frisch, M. J.; Trucks, G. W.; Schlegel, H. B.; Scuseria, G. E.; Robb, M. A.; Cheeseman, J. R.; Scalmani, G.; Barone, V.; Mennucci, B.; Petersson, G. A.; Nakatsuji, H.; Caricato, M.; Li, X.; Hratchian, H. P.; Izmaylov, A. F.; Bloino, J.; Zheng, G.; Sonnenberg, J. L.; Hada, M.; Ehara, M.; Toyota, K.; Fukuda, R.; Hasegawa, J.; Ishida, M.; Nakajima, T.; Honda, Y.; Kitao, O.; Nakai, H.; Vreven, T.; Montgomery, Jr., J. A.; Peralta, J. E.; Ogliaro, F.; Bearpark, M.; Heyd, J. J.; Brothers, E.; Kudin, K. N.; Staroverov, V. N.; Kobayashi,

---

R.; Normand, J.; Raghavachari, K.; Rendell, A.; Burant, J. C.; Iyengar, S. S.; Tomasi, J.; Cossi, M.; Rega, N.; Millam, N. J.; Klene, M.; Knox, J. E.; Cross, J. B.; Bakken, V.; Adamo, C.; Jaramillo, J.; Gomperts, R.; Stratmann, R. E.; Yazyev, O.; Austin, A. J.; Cammi, R.; Pomelli, C.; Ochterski, J. W.; Martin, R. L.; Morokuma, K.; Zakrzewski, V. G.; Voth, G. A.; Salvador, P.; Dannenberg, J. J.; Dapprich, S.; Daniels, A. D.; Farkas, Ö.; Foresman, J. B.; Ortiz, J. V.; Cioslowski, J.; Fox, D. J. Gaussian, Inc., Wallingford CT, 2009.

13. Gaussian 09, Revision D.01, Frisch, M. J.; Trucks, G. W.; Schlegel, H. B.; Scuseria, G. E.; Robb, M. A.; Cheeseman, J. R.; Scalmani, G.; Barone, V.; Mennucci, B.; Petersson, G. A.; Nakatsuji, H.; Caricato, M.; Li, X.; Hratchian, H. P.; Izmaylov, A. F.; Bloino, J.; Zheng, G.; Sonnenberg, J. L.; Hada, M.; Ehara, M.; Toyota, K.; Fukuda, R.; Hasegawa, J.; Ishida, M.; Nakajima, T.; Honda, Y.; Kitao, O.; Nakai, H.; Vreven, T.; Montgomery, J. A., Jr.; Peralta, J. E.; Ogliaro, F.; Bearpark, M.; Heyd, J. J.; Brothers, E.; Kudin, K. N.; Staroverov, V. N.; Kobayashi, R.; Normand, J.; Raghavachari, K.; Rendell, A.; Burant, J. C.; Iyengar, S. S.; Tomasi, J.; Cossi, M.; Rega, N.; Millam, N. J.; Klene, M.; Knox, J. E.; Cross, J. B.; Bakken, V.; Adamo, C.; Jaramillo, J.; Gomperts, R.; Stratmann, R. E.; Yazyev, O.; Austin, A. J.; Cammi, R.; Pomelli, C.; Ochterski, J. W.; Martin, R. L.; Morokuma, K.; Zakrzewski, V. G.; Voth, G. A.; Salvador, P.; Dannenberg, J. J.; Dapprich, S.; Daniels, A. D.; Farkas, Ö.; Foresman, J. B.; Ortiz, J. V.; Cioslowski, J.; Fox, D. J. Gaussian, Inc., Wallingford CT, 2009.

14. Singleton, D. A.; Hang, C.; Szymanski, M. J.; Greenwald, E. E. *J. Am. Chem. Soc.* **2003**, *125*, 1176-1177.

15. Bell, R. P. *The Tunnel Effect in Chemistry*; Chapman & Hall: London, 1980; pp 60-63.

16. (a) Meyer, M. P.; DelMonte, A. J.; Singleton, D. A. *J. Am. Chem. Soc.* **1999**, *121*, 10865-10874. (b) DelMonte, A. J.; Haller, J.; Houk, K. N.; Sharpless, K. B.; Singleton, D. A.; Strassner, T.; Thomas, A. A. *J. Am. Chem. Soc.* **1997**, *119*, 9907-9908. (c) Singleton, D. A.; Merrigan, S. R.; Liu, J.; Houk, K. N. *J. Am. Chem. Soc.* **1997**, *119*, 3385-3386. (d) Beno, B. R.; Houk, K. N.; Singleton, D. A. *J. Am. Chem. Soc.* **1996**, *118*, 9984-9985.

17. J. Zheng, S. Zhang, B. J. Lynch, J. C. Corchado, Y.-Y. Chuang, P. L. Fast, W.-P. Hu, Y.-P. Liu, G. C. Lynch, K. A. Nguyen, C. F. Jackels, A. Fernandez Ramos, B. A. Ellingson, V. S. Melissas, J. Villà, I. Rossi, E. L. Coitiño, J. Pu, T. V. Albu, R. Steckler, B. C. Garrett, A. D. Isaacson, and D. G. Truhlar, POLYRATE-version 2010, University of Minnesota, Minneapolis, 2010.

18. Bigeleisen, J.; Mayer, M. G. *J. Chem. Phys.* **1947**, *15*, 261-267. Wolfsberg, M. *Acc. Chem. Res.* **1972**, *5*, 225-233. Bigeleisen, J. *J. Chem. Phys.* **1949**, *17*, 675-678.

19. Saunders, M.; Laidig, K. E.; Wolfsberg, M. *J. Am. Chem. Soc.* **1989**, *111*, 8989-8994.

20. Brueckner, K. A. *Phys. Rev.* **1954**, *96*, 508. Handy, N. C.; Pople, J. A.; Head-Gordon, M.; Raghavachari, K.; Trucks, G. W. *Chem. Phys. Lett.* **1989**, *164*, 185-192.

21. Bekele, T.; Lipton, M. A.; Singleton, D. A.; Christian, C. F. *J. Am. Chem. Soc.* **2005**, *127*, 9216-9223.

22. See, for example: Cramer, C. J.; Squires, R. R. *Org. Lett.* **1999**, *1*, 215-218.

23. Chapman, S.; Bunker, D.L. *J. Chem. Phys.* **1975**, *62*, 2890-2899.
